# Supplementary material for: Income gaps in self-rated poor health and its association with life expectancy in 245 districts of Korea
Source: PubMed Central journal article supplement (PMC5543297; doi:10.4178/epih.e2017011), 2017-03-15
Supplement: epih-39-e2017011-app2.pdf [file epih-39-e2017011-app2.pdf]

**Appendix 2.** Ten top and bottom districts in terms of age-standardized prevalences of self-rated poor health in Korea: findings from the Korea Community Health Survey, 2008-2014

|                   | Top 10            |                |                            | Bottom 10   |              |                            |
|-------------------|-------------------|----------------|----------------------------|-------------|--------------|----------------------------|
|                   | Province          | District       | Self-rated poor health (%) | Province    | District     | Self-rated poor health (%) |
| Total             | Jeollabuk-do      | Gochang-gun    | 21.8                       | Gyeonggi-do | Bundang-gu   | 8.1                        |
|                   | Gyeongsangnam-do  | Namhae-gun     | 21.6                       | Seoul       | Seocho-gu    | 9.4                        |
|                   | Gyeongsangnam-do  | Hadong-gun     | 21.2                       | Seoul       | Gangnam-gu   | 9.7                        |
|                   | Gyeongsangbuk-do  | Yeongyang-gun  | 20.6                       | Seoul       | Songpa-gu    | 10.0                       |
|                   | Gangwon-do        | Taebaek-si     | 20.4                       | Gyeonggi-do | Suji-gu      | 10.0                       |
|                   | Gangwon-do        | Jeongseon-gun  | 19.9                       | Seoul       | Yongsan-gu   | 10.4                       |
|                   | Chungcheongnam-do | Boryeong-si    | 19.8                       | Gyeonggi-do | Giheung-gu   | 11.0                       |
|                   | Jeollanam-do      | Sinan-gun      | 19.8                       | Gyeonggi-do | Yeongtong-gu | 11.2                       |
|                   | Gyeongsangbuk-do  | Bonghwa-gun    | 19.7                       | Gyeonggi-do | Ilseong-gu   | 11.7                       |
|                   | Jeollabuk-do      | Buan-gun       | 19.5                       | Gyeonggi-do | Dongan-gu    | 11.8                       |
|                   | Men               | Gangwon-do     | Taebaek-si                 | 18.7        | Gyeonggi-do  | Bundang-gu                 |
| Gyeongsangnam-do  |                   | Namhae-gun     | 18.6                       | Seoul       | Seocho-gu    | 7.5                        |
| Jeollabuk-do      |                   | Gochang-gun    | 17.9                       | Seoul       | Gangnam-gu   | 7.8                        |
| Gangwon-do        |                   | Jeongseon-gun  | 17.8                       | Seoul       | Songpa-gu    | 7.8                        |
| Gyeongsangnam-do  |                   | Hadong-gun     | 17.7                       | Gyeonggi-do | Suji-gu      | 7.9                        |
| Gyeongsangbuk-do  |                   | Yeongyang-gun  | 17.3                       | Gyeonggi-do | Giheung-gu   | 8.4                        |
| Jeollabuk-do      |                   | Buan-gun       | 17.2                       | Gyeonggi-do | Gwacheon-si  | 8.8                        |
| Gyeongsangbuk-do  |                   | Cheongsong-gun | 16.9                       | Gyeonggi-do | Dongan-gu    | 9.2                        |
| Gyeongsangnam-do  |                   | Sancheong-gun  | 16.9                       | Seoul       | Mapo-gu      | 9.3                        |
| Chungcheongnam-do |                   | Boryeong-si    | 16.8                       | Gyeonggi-do | Ilseong-gu   | 9.4                        |
| Women             |                   | Jeollabuk-do   | Gochang-gun                | 24.4        | Gyeonggi-do  | Bundang-gu                 |
|                   | Gyeongsangnam-do  | Namhae-gun     | 23.5                       | Seoul       | Seocho-gu    | 10.8                       |
|                   | Gyeongsangnam-do  | Hadong-gun     | 23.5                       | Seoul       | Yongsan-gu   | 11.1                       |
|                   | Gyeongsangbuk-do  | Yeongyang-gun  | 23.2                       | Seoul       | Gangnam-gu   | 11.1                       |
|                   | Gyeongsangbuk-do  | Bonghwa-gun    | 23.0                       | Gyeonggi-do | Suji-gu      | 11.6                       |
|                   | Chungcheongnam-do | Boryeong-si    | 22.0                       | Seoul       | Songpa-gu    | 11.8                       |
|                   | Jeollanam-do      | Sinan-gun      | 22.0                       | Gyeonggi-do | Yeongtong-gu | 12.5                       |
|                   | Gyeongsangnam-do  | Tongyeong-si   | 21.9                       | Seoul       | Seongbuk-gu  | 13.0                       |
|                   | Gangwon-do        | Taebaek-si     | 21.8                       | Gyeonggi-do | Giheung-gu   | 13.1                       |
|                   | Jeollanam-do      | Hampyeong-gun  | 21.7                       | Gyeonggi-do | Gimpo-si     | 13.1                       |
