# Supplementary material for: Income gaps in self-rated poor health and its association with life expectancy in 245 districts of Korea
Source: PubMed Central journal article supplement (PMC5543297; doi:10.4178/epih.e2017011), 2017-03-15
Supplement: epih-39-e2017011-app3.pdf [file epih-39-e2017011-app3.pdf]

**Appendix 3.** Ten top and bottom districts in terms of income gaps in self-rated poor health between the lowest and highest income quintiles in South Korea: findings from the Korea Community Health Survey, 2008-2014

|       | Top 10            |                |                                                         | Bottom 10        |                 |                                                         |
|-------|-------------------|----------------|---------------------------------------------------------|------------------|-----------------|---------------------------------------------------------|
|       | Province          | District       | Interquintile income gap in self-rated poor health (%p) | Province         | District        | Interquintile income gap in self-rated poor health (%p) |
| Total | Jeollanam-do      | Goheung-gun    | 20.1                                                    | Gyeonggi-do      | Suji-gu         | 2.8                                                     |
|       | Busan             | Haeundae-gu    | 18.8                                                    | Gyeonggi-do      | Bundang-gu      | 4.0                                                     |
|       | Gyeongsangbuk-do  | Yecheon-gun    | 18.3                                                    | Gyeonggi-do      | Yeongtong-gu    | 4.6                                                     |
|       | Jeollanam-do      | Boseong-gun    | 16.6                                                    | Incheon          | Ongjin-gun      | 5.0                                                     |
|       | Gyeongsangbuk-do  | Yeongdeok-gun  | 16.5                                                    | Seoul            | Songpa-gu       | 5.2                                                     |
|       | Jeollanam-do      | Naju-si        | 16.1                                                    | Gyeonggi-do      | Dongan-gu       | 5.2                                                     |
|       | Jeollanam-do      | Wando-gun      | 16.0                                                    | Gyeonggi-do      | Gwangmyeong-si  | 5.4                                                     |
|       | Gangwon-do        | Samcheok-si    | 15.8                                                    | Seoul            | Seocho-gu       | 5.9                                                     |
|       | Gyeongsangnam-do  | Namhae-gun     | 15.7                                                    | Gyeonggi-do      | Gimpo-si        | 6.2                                                     |
|       | Chungcheongnam-do | Boryeong-si    | 15.6                                                    | Gyeonggi-do      | Osan-si         | 6.2                                                     |
| Men   | Jeollanam-do      | Goheung-gun    | 23.5                                                    | Gyeonggi-do      | Yeongtong-gu    | 2.7                                                     |
|       | Jeollanam-do      | Wando-gun      | 20.1                                                    | Gyeonggi-do      | Bundang-gu      | 2.7                                                     |
|       | Jeollanam-do      | Yeonggwang-gun | 19.4                                                    | Seoul            | Seongdong-gu    | 3.6                                                     |
|       | Jeollabuk-do      | Gochang-gun    | 18.6                                                    | Gyeonggi-do      | Dongan-gu       | 3.9                                                     |
|       | Jeollanam-do      | Boseong-gun    | 18.6                                                    | Gyeonggi-do      | Cheoin-gu       | 4.4                                                     |
|       | Gyeongsangnam-do  | Miryang-si     | 18.2                                                    | Incheon          | Yeonsu-gu       | 4.8                                                     |
|       | Jeollabuk-do      | Imsil-gun      | 18.1                                                    | Gyeonggi-do      | Suji-gu         | 4.8                                                     |
|       | Busan             | Haeundae-gu    | 17.9                                                    | Busan            | Sasang-gu       | 5.4                                                     |
|       | Jeollanam-do      | Naju-si        | 17.8                                                    | Gyeonggi-do      | Yeosu-gun       | 5.7                                                     |
|       | Gyeongsangbuk-do  | Yecheon-gun    | 17.7                                                    | Gyeonggi-do      | Gunpo-si        | 5.7                                                     |
| Women | Busan             | Haeundae-gu    | 19.2                                                    | Gyeonggi-do      | Suji-gu         | 1.5                                                     |
|       | Jeollanam-do      | Goheung-gun    | 18.2                                                    | Gyeongsangbuk-do | Cheongdo-gun    | 2.2                                                     |
|       | Gyeongsangbuk-do  | Uljin-gun      | 16.6                                                    | Gyeonggi-do      | Gimpo-si        | 3.4                                                     |
|       | Jeollanam-do      | Naju-si        | 16.5                                                    | Gyeonggi-do      | Ilseong-gu      | 4.0                                                     |
|       | Jeollanam-do      | Boseong-gun    | 16.4                                                    | Gyeonggi-do      | Bundang-gu      | 4.0                                                     |
|       | Jeollanam-do      | Hwasun-gun     | 16.3                                                    | Gyeonggi-do      | Osan-si         | 4.1                                                     |
|       | Jeollanam-do      | Hampyeong-gun  | 16.0                                                    | Gyeongsangnam-do | Changnyeong-gun | 4.5                                                     |
|       | Gyeongsangbuk-do  | Bonghwa-gun    | 15.8                                                    | Seoul            | Songpa-gu       | 4.6                                                     |
|       | Jeollabuk-do      | Iksan-si       | 15.8                                                    | Gyeonggi-do      | Dongan-gu       | 5.2                                                     |
|       | Jeollanam-do      | Yeonggwang-gun | 15.4                                                    | Gyeonggi-do      | Yeongtong-gu    | 5.2                                                     |
