# Supplementary material for: Income gaps in self-rated poor health and its association with life expectancy in 245 districts of Korea
Source: PubMed Central journal article supplement (PMC5543297; doi:10.4178/epih.e2017011), 2017-03-15
Supplement: epih-39-e2017011-app4.pdf [file epih-39-e2017011-app4.pdf]

**Appendix 4.** Age-standardized prevalences of self-rated poor health, self-rated poor health prevalences according to income quintiles, and income gaps in self-rated poor health (between the highest [Q5] and the lowest [Q1] income quintiles) in 245 local districts of South Korea: findings from the Korea Community Health Survey, 2008-2014

| Gender | Provinces | Districts       | Overall          | Q1 (lowest)      | Q2               | Q3               | Q4               | Q5 (highest)     | Q1-Q5            | Urbanity     |
|--------|-----------|-----------------|------------------|------------------|------------------|------------------|------------------|------------------|------------------|--------------|
| Total  | Seoul     | Jongno-gu       | 12.5 (11.7,13.4) | 20.3 (17.8,22.7) | 12.6 (10.8,14.5) | 12.2 (10.3,14.1) | 9.8 (8.1,11.4)   | 8.2 (6.7,9.7)    | 12.1 (7.1,13.1)  | Metropolitan |
|        | Seoul     | Jung-gu         | 13.5 (12.6,14.4) | 21.7 (19.1,24.2) | 14.5 (12.5,16.6) | 12.7 (10.8,14.5) | 10.2 (8.5,11.9)  | 9.2 (7.5,10.8)   | 12.5 (9.2,15.4)  | Metropolitan |
|        | Seoul     | Yongsan-gu      | 10.4 (9.7,11.2)  | 16.9 (14.6,19.2) | 9.8 (8.1,11.5)   | 8.8 (7.2,10.4)   | 8.7 (7.1,10.3)   | 8.1 (6.6,9.6)    | 8.8 (8.2,14.4)   | Metropolitan |
|        | Seoul     | Seongdong-gu    | 12.8 (11.9,13.8) | 16.3 (14.0,18.6) | 14.3 (12.2,16.3) | 12.9 (10.8,14.9) | 11.2 (9.3,13.0)  | 9.6 (7.8,11.4)   | 6.7 (2.4,7.8)    | Metropolitan |
|        | Seoul     | Gwangjin-gu     | 12.3 (11.3,13.2) | 16.4 (14.0,18.8) | 13.5 (11.3,15.6) | 11.5 (9.5,13.5)  | 11.2 (9.3,13.0)  | 9.0 (7.2,10.8)   | 7.4 (5.8,11.4)   | Metropolitan |
|        | Seoul     | Dongdaemun-gu   | 14.0 (13.1,14.9) | 18.9 (16.5,21.4) | 15.0 (13.0,17.1) | 13.3 (11.3,15.2) | 12.5 (10.5,14.4) | 10.3 (8.5,12.1)  | 8.6 (5.5,11.3)   | Metropolitan |
|        | Seoul     | Jungnang-gu     | 13.1 (12.2,14.0) | 19.8 (17.3,22.4) | 14.2 (12.1,16.2) | 11.6 (9.7,13.4)  | 11.3 (9.4,13.2)  | 8.8 (7.1,10.5)   | 11.0 (8.1,13.9)  | Metropolitan |
|        | Seoul     | Seongbuk-gu     | 11.9 (11.1,12.8) | 18.8 (16.4,21.2) | 11.1 (9.3,12.9)  | 11.0 (9.2,12.7)  | 10.4 (8.6,12.2)  | 8.5 (6.9,10.1)   | 10.3 (7.1,12.9)  | Metropolitan |
|        | Seoul     | Gangbuk-gu      | 13.9 (13.0,14.8) | 18.4 (16.0,20.8) | 16.4 (14.2,18.5) | 12.9 (11.0,14.8) | 11.2 (9.4,12.9)  | 10.4 (8.7,12.1)  | 8.0 (4.7,10.7)   | Metropolitan |
|        | Seoul     | Dobong-gu       | 13.8 (12.9,14.7) | 19.4 (17.0,21.9) | 14.5 (12.5,16.6) | 13.0 (11.0,14.9) | 10.8 (9.0,12.5)  | 11.7 (9.8,13.6)  | 7.7 (4.9,11.1)   | Metropolitan |
|        | Seoul     | Nowon-gu        | 14.2 (13.2,15.1) | 23.8 (21.0,26.5) | 15.8 (13.7,18.0) | 12.3 (10.4,14.3) | 10.1 (8.3,11.8)  | 8.8 (7.1,10.5)   | 15.0 (10.0,16.0) | Metropolitan |
|        | Seoul     | Eunpyeong-gu    | 14.3 (13.3,15.2) | 20.7 (18.2,23.3) | 15.7 (13.5,17.9) | 13.6 (11.6,15.6) | 11.4 (9.6,13.2)  | 10.1 (8.3,11.8)  | 10.6 (7.1,13.1)  | Metropolitan |
|        | Seoul     | Seodaemun-gu    | 13.7 (12.8,14.6) | 20.2 (17.7,22.7) | 14.9 (12.8,17.0) | 12.0 (10.1,13.9) | 12.8 (10.9,14.7) | 8.8 (7.2,10.4)   | 11.4 (8.1,13.9)  | Metropolitan |
|        | Seoul     | Mapo-gu         | 12.0 (11.1,12.9) | 17.0 (14.7,19.4) | 15.0 (12.8,17.2) | 11.8 (9.9,13.8)  | 9.1 (7.4,10.8)   | 7.2 (5.7,8.8)    | 9.8 (6.9,13.1)   | Metropolitan |
|        | Seoul     | Yangcheon-gu    | 13.5 (12.6,14.5) | 21.5 (18.7,24.2) | 13.5 (11.4,15.6) | 11.6 (9.6,13.5)  | 11.0 (9.0,12.9)  | 10.7 (8.8,12.6)  | 10.8 (6.0,12.4)  | Metropolitan |
|        | Seoul     | Gangseo-gu      | 13.7 (12.7,14.6) | 20.7 (18.1,23.4) | 15.8 (13.6,18.0) | 12.6 (10.6,14.6) | 10.1 (8.3,11.9)  | 9.4 (7.7,11.2)   | 11.3 (7.5,13.3)  | Metropolitan |
|        | Seoul     | Guro-gu         | 14.2 (13.3,15.2) | 22.0 (19.2,24.7) | 13.5 (11.4,15.6) | 14.1 (12.1,16.2) | 11.2 (9.3,13.1)  | 10.7 (8.8,12.6)  | 11.3 (7.6,13.8)  | Metropolitan |
|        | Seoul     | Geumcheon-gu    | 14.4 (13.5,15.3) | 21.0 (18.4,23.6) | 15.3 (13.1,17.4) | 13.8 (11.7,15.8) | 10.8 (9.0,12.6)  | 11.4 (9.5,13.3)  | 9.6 (4.5,10.5)   | Metropolitan |
|        | Seoul     | Yeongdeungpo-gu | 13.9 (13.0,14.9) | 21.1 (18.5,23.7) | 14.8 (12.7,17.0) | 12.7 (10.7,14.6) | 10.1 (8.3,11.8)  | 11.0 (9.1,12.9)  | 10.1 (7.4,13.4)  | Metropolitan |
|        | Seoul     | Dongjak-gu      | 14.3 (13.3,15.2) | 19.0 (16.5,21.5) | 15.1 (12.9,17.3) | 12.6 (10.6,14.6) | 14.0 (12.0,16.1) | 10.9 (9.1,12.7)  | 8.1 (3.9,9.9)    | Metropolitan |
|        | Seoul     | Gwanak-gu       | 14.2 (13.3,15.2) | 18.7 (16.1,21.3) | 15.7 (13.4,18.0) | 14.3 (12.1,16.4) | 11.4 (9.4,13.4)  | 11.4 (9.4,13.4)  | 7.3 (5.4,11.2)   | Metropolitan |
|        | Seoul     | Seocho-gu       | 9.4 (8.6,10.2)   | 12.9 (10.8,15.0) | 11.6 (9.6,13.6)  | 8.8 (7.1,10.5)   | 7.1 (5.6,8.6)    | 7.0 (5.4,8.6)    | 5.9 (3.7,8.9)    | Metropolitan |
|        | Seoul     | Gangnam-gu      | 9.7 (8.8,10.5)   | 14.6 (12.3,17.0) | 10.5 (8.5,12.4)  | 8.8 (7.1,10.6)   | 8.0 (6.4,9.7)    | 6.7 (5.2,8.3)    | 7.9 (5.8,11.2)   | Metropolitan |
|        | Seoul     | Songpa-gu       | 10.0 (9.2,10.9)  | 13.2 (11.0,15.4) | 9.4 (7.6,11.2)   | 10.0 (8.1,11.9)  | 9.6 (7.8,11.3)   | 8.0 (6.3,9.7)    | 5.2 (4.0,9.2)    | Metropolitan |
|        | Seoul     | Gangdong-gu     | 13.3 (12.3,14.2) | 17.6 (15.1,20.0) | 16.0 (13.8,18.3) | 12.1 (10.1,14.1) | 10.7 (8.8,12.7)  | 9.9 (8.0,11.9)   | 7.7 (5.2,11.6)   | Metropolitan |
|        | Busan     | Jung-gu         | 15.0 (14.1,15.9) | 21.4 (18.9,23.9) | 16.8 (14.7,18.8) | 15.5 (13.4,17.5) | 12.0 (10.3,13.8) | 9.8 (8.2,11.4)   | 11.6 (7.9,14.1)  | Metropolitan |
|        | Busan     | Seo-gu          | 15.1 (14.2,16.0) | 24.2 (21.6,26.8) | 14.9 (13.0,16.9) | 13.6 (11.7,15.5) | 12.3 (10.6,14.1) | 10.6 (8.9,12.3)  | 13.6 (8.8,15.2)  | Metropolitan |
|        | Busan     | Dong-gu         | 18.7 (17.7,19.7) | 29.4 (26.5,32.3) | 16.6 (16.3,20.8) | 16.6 (14.5,18.6) | 15.2 (13.2,17.2) | 13.8 (11.9,15.7) | 15.6 (11.3,18.1) | Metropolitan |
|        | Busan     | Yeongdo-gu      | 18.0 (17.0,18.9) | 27.9 (25.1,30.8) | 18.8 (16.6,21.1) | 16.4 (14.3,18.4) | 14.1 (12.2,16.0) | 13.1 (11.3,14.9) | 14.8 (10.6,17.4) | Metropolitan |
|        | Busan     | Busanjin-gu     | 15.2 (14.2,16.1) | 23.2 (20.6,25.8) | 16.4 (14.2,18.6) | 13.5 (11.5,15.5) | 12.2 (10.4,14.0) | 10.6 (8.8,12.3)  | 12.6 (10.0,16.2) | Metropolitan |
|        | Busan     | Dongnae-gu      | 13.5 (12.6,14.4) | 19.2 (16.9,21.5) | 14.2 (12.1,16.2) | 11.8 (10.0,13.6) | 12.0 (10.2,13.8) | 10.2 (8.4,12.0)  | 9.0 (6.9,12.7)   | Metropolitan |
|        | Busan     | Nam-gu          | 14.4 (13.5,15.3) | 19.9 (17.4,22.3) | 15.7 (13.6,17.8) | 14.2 (12.2,16.2) | 12.5 (10.7,14.4) | 10.1 (8.4,11.9)  | 9.8 (7.5,13.5)   | Metropolitan |
|        | Busan     | Buk-gu          | 14.9 (13.9,15.9) | 23.6 (20.8,26.4) | 14.8 (12.6,17.0) | 14.8 (12.6,17.0) | 10.4 (8.6,12.2)  | 11.2 (9.2,13.2)  | 12.4 (10.9,17.1) | Metropolitan |
|        | Busan     | Haendae-gu      | 14.7 (13.8,15.7) | 26.9 (24.1,29.5) | 14.4 (12.3,16.5) | 12.3 (10.4,14.2) | 12.3 (10.3,14.2) | 8.1 (6.5,9.6)    | 18.8 (15.3,21.5) | Metropolitan |
|        | Busan     | Saha-gu         | 14.6 (13.6,15.5) | 22.8 (20.1,25.5) | 14.7 (12.6,16.8) | 12.5 (10.5,14.4) | 11.5 (9.6,13.4)  | 11.7 (9.8,13.6)  | 11.1 (8.1,14.5)  | Metropolitan |
|        | Busan     | Geumjeong-gu    | 13.3 (12.4,14.2) | 21.5 (18.9,24.1) | 14.5 (12.5,16.5) | 12.5 (10.6,14.4) | 10.5 (8.8,12.3)  | 8.2 (6.6,9.7)    | 13.3 (10.6,16.4) | Metropolitan |
|        | Busan     | Gangseo-gu      | 16.8 (15.9,17.8) | 23.0 (20.4,25.5) | 18.1 (15.9,20.3) | 15.3 (13.2,17.3) | 14.2 (12.2,16.1) | 13.8 (11.8,15.7) | 9.2 (5.7,12.1)   | Metropolitan |
|        | Busan     | Yeonje-gu       | 15.1 (14.1,16.0) | 24.7 (21.9,27.4) | 14.7 (12.7,16.8) | 12.6 (10.6,14.5) | 11.2 (9.5,13.0)  | 12.4 (10.4,14.3) | 12.3 (8.6,15.0)  | Metropolitan |
|        | Busan     | Suyeong-gu      | 13.7 (12.9,14.6) | 20.0 (17.6,22.3) | 15.0 (12.9,17.0) | 11.2 (9.5,13.0)  | 11.9 (10.1,13.7) | 10.6 (8.9,12.3)  | 9.4 (6.2,12.4)   | Metropolitan |
|        | Busan     | Sasang-gu       | 16.4 (15.4,17.4) | 22.3 (19.6,25.1) | 17.0 (14.7,19.4) | 15.1 (12.9,17.3) | 14.0 (11.9,16.2) | 13.7 (11.5,15.9) | 8.6 (4.8,11.2)   | Metropolitan |
|        | Busan     | Gijang-gun      | 17.9 (16.9,18.9) | 23.8 (21.1,26.4) | 20.6 (18.2,23.1) | 17.3 (15.1,19.4) | 15.6 (13.5,17.6) | 12.5 (10.6,14.3) | 11.3 (7.7,14.3)  | Rural        |
|        | Daegu     | Jung-gu         | 17.0 (16.0,18.0) | 25.5 (22.8,28.3) | 17.9 (15.8,20.1) | 15.4 (13.4,17.5) | 13.4 (11.6,15.3) | 12.8 (10.9,14.7) | 12.7 (9.2,15.8)  | Metropolitan |
|        | Daegu     | Dong-gu         | 18.1 (17.1,19.1) | 25.6 (22.8,28.4) | 18.3 (16.0,20.6) | 17.8 (15.6,20.0) | 16.2 (14.0,18.4) | 12.9 (10.9,14.8) | 12.7 (9.4,15.8)  | Metropolitan |
|        | Daegu     | Seo-gu          | 18.2 (17.2,19.2) | 25.3 (22.5,28.1) | 18.4 (16.1,20.8) | 16.1 (14.0,18.3) | 17.3 (15.1,19.6) | 13.7 (11.7,15.7) | 11.6 (5.6,12.2)  | Metropolitan |
|        | Daegu     | Nam-gu          | 15.8 (14.9,16.8) | 22.8 (20.2,25.4) | 17.5 (15.3,19.8) | 15.0 (13.0,17.0) | 12.9 (11.0,14.8) | 11.1 (9.3,12.9)  | 11.7 (9.5,15.7)  | Metropolitan |
|        | Daegu     | Buk-gu          | 14.7 (13.7,15.7) | 22.5 (19.7,25.3) | 15.6 (13.3,17.8) | 14.9 (12.7,17.1) | 10.8 (9.0,12.7)  | 10.1 (8.3,12.0)  | 12.4 (10.5,16.7) | Metropolitan |
|        | Daegu     | Suseong-gu      | 15.1 (14.2,16.1) | 23.7 (21.0,26.5) | 16.1 (13.8,18.3) | 14.5 (12.4,16.5) | 11.5 (9.6,13.4)  | 10.3 (8.5,12.1)  | 13.4 (9.1,15.3)  | Metropolitan |
|        | Daegu     | Dalseo-gu       | 16.0 (14.9,17.0) | 23.6 (20.8,26.3) | 18.3 (15.8,20.9) | 13.9 (11.8,16.1) | 12.9 (10.9,15.0) | 11.4 (9.4,13.4)  | 12.2 (8.9,15.1)  | Metropolitan |
|        | Daegu     | Dalseong-gun    | 17.2 (16.2,18.2) | 23.2 (20.5,25.9) | 18.3 (15.9,20.6) | 16.1 (13.9,18.3) | 13.8 (11.7,15.8) | 14.9 (12.7,17.0) | 8.3 (6.9,13.3)   | Rural        |
|        | Incheon   | Jung-gu         | 14.7 (13.8,15.6) | 21.2 (18.7,23.8) | 14.5 (12.5,16.5) | 14.7 (12.6,16.7) | 11.7 (9.9,13.5)  | 11.5 (9.6,13.3)  | 9.7 (7.4,14.6)   | Metropolitan |
|        | Incheon   | Dong-gu         | 14.1 (13.3,15.0) | 19.9 (17.4,22.3) | 14.9 (12.9,17.0) | 14.3 (12.3,16.3) | 11.1 (9.4,12.8)  | 10.9 (9.1,12.6)  | 9.0 (5.3,11.3)   | Metropolitan |
|        | Incheon   | Nam-gu          | 12.6 (11.7,13.4) | 19.0 (16.5,21.5) | 12.4 (10.4,14.3) | 11.2 (9.3,13.0)  | 10.9 (9.1,12.7)  | 9.9 (8.2,11.7)   | 9.1 (5.6,11.4)   | Metropolitan |
|        | Incheon   | Yeonsu-gu       | 13.9 (12.9,15.0) | 21.1 (18.2,23.9) | 14.5 (12.1,16.8) | 12.8 (10.6,14.9) | 11.6 (9.6,13.7)  | 10.3 (8.3,12.3)  | 10.8 (6.9,13.3)  | Metropolitan |
|        | Incheon   | Namdong-gu      | 15.0 (14.0,16.0) | 21.5 (18.7,24.3) | 15.4 (13.1,17.8) | 15.1 (12.8,17.4) | 10.6 (8.7,12.5)  | 12.3 (10.3,14.4) | 9.2 (7.7,14.3)   | Metropolitan |
|        | Incheon   | Bupyeong-gu     | 16.0 (14.9,17.0) | 24.3 (21.4,27.3) | 16.0 (13.7,18.4) | 15.5 (13.2,17.7) | 12.9 (10.9,14.9) | 11.8 (9.8,13.8)  | 12.5 (9.2,16.2)  | Metropolitan |
|        | Incheon   | Gyeyang-gu      | 15.7 (14.6,16.8) | 22.3 (19.3,25.3) | 17.5 (14.8,20.1) | 13.7 (11.5,15.9) | 12.9 (10.7,15.1) | 12.6 (10.4,14.8) | 9.7 (6.3,13.1)   | Metropolitan |
|        | Incheon   | Seo-gu          | 16.2 (15.1,17.3) | 21.9 (19.0,24.9) | 16.2 (13.7,18.6) | 15.5 (13.0,17.9) | 14.3 (12.0,16.6) | 13.5 (11.2,15.8) | 8.4 (5.5,12.7)   | Metropolitan |
|        | Incheon   | Ganghwa-gun     | 16.3 (15.3,17.2) | 22.0 (19.5,24.6) | 17.7 (15.5,19.9) | 15.4 (13.5,17.4) | 12.7 (10.9,14.4) | 13.4 (11.5,15.4) | 8.6 (4.3,10.7)   | Rural        |

(continued to the next page)

## Appendix 4. Continued

| Gender | Provinces   | Districts      | Overall          | Q1 (lowest)      | Q2               | Q3               | Q4               | Q5 (highest)     | Q1-Q5            | Urbanity     |
|--------|-------------|----------------|------------------|------------------|------------------|------------------|------------------|------------------|------------------|--------------|
|        | Incheon     | Ongjin-gun     | 12.7 (11.9,13.6) | 16.5 (14.3,18.7) | 12.7 (10.9,14.6) | 11.7 (9.9,13.5)  | 11.2 (9.5,12.9)  | 11.5 (9.7,13.3)  | 5.0 (3.0,9.8)    | Rural        |
|        | Gwangju     | Dong-gu        | 15.1 (14.2,16.0) | 23.4 (20.7,26.0) | 16.9 (14.8,19.1) | 13.5 (11.6,15.4) | 11.8 (10.1,13.6) | 10.5 (8.8,12.2)  | 12.9 (10.3,16.5) | Metropolitan |
|        | Gwangju     | Seo-gu         | 13.8 (12.8,14.7) | 19.7 (17.2,22.3) | 15.5 (13.2,17.8) | 11.9 (9.9,13.9)  | 11.7 (9.8,13.7)  | 10.5 (8.6,12.3)  | 9.2 (6.4,12.2)   | Metropolitan |
|        | Gwangju     | Nam-gu         | 15.3 (14.4,16.3) | 23.0 (20.4,25.7) | 16.5 (14.3,18.7) | 14.2 (12.3,16.2) | 12.1 (10.2,14.0) | 11.4 (9.6,13.2)  | 11.6 (8.9,15.1)  | Metropolitan |
|        | Gwangju     | Buk-gu         | 15.7 (14.7,16.7) | 23.1 (20.4,25.8) | 15.3 (13.1,17.5) | 15.3 (13.1,17.5) | 13.5 (11.5,15.6) | 11.5 (9.5,13.4)  | 11.6 (7.2,13.2)  | Metropolitan |
|        | Gwangju     | Gwangsan-gu    | 15.8 (14.7,16.8) | 23.9 (20.9,27.0) | 17.2 (14.7,19.7) | 14.7 (12.4,17.0) | 11.7 (9.6,13.8)  | 11.6 (9.5,13.8)  | 12.3 (8.7,15.5)  | Metropolitan |
|        | Daejeon     | Dong-gu        | 14.9 (14.0,15.8) | 25.4 (22.6,28.3) | 16.0 (13.9,18.1) | 12.0 (10.1,13.8) | 11.5 (9.7,13.4)  | 10.1 (8.4,11.8)  | 15.3 (10.7,16.9) | Metropolitan |
|        | Daejeon     | Jung-gu        | 13.3 (12.4,14.2) | 20.7 (18.2,23.3) | 13.3 (11.4,15.3) | 12.6 (10.7,14.6) | 11.5 (9.7,13.3)  | 8.9 (7.3,10.5)   | 11.8 (7.8,13.8)  | Metropolitan |
|        | Daejeon     | Seo-gu         | 14.0 (13.0,15.0) | 21.2 (18.3,24.0) | 15.1 (12.8,17.3) | 12.8 (10.6,15.0) | 11.7 (9.7,13.7)  | 9.7 (7.8,11.6)   | 11.5 (9.8,15.8)  | Metropolitan |
|        | Daejeon     | Yuseong-gu     | 12.4 (11.4,13.4) | 17.3 (14.3,19.8) | 15.0 (12.6,17.4) | 9.9 (8.0,11.8)   | 10.8 (8.7,12.9)  | 8.5 (6.5,10.4)   | 8.8 (5.9,11.7)   | Metropolitan |
|        | Daejeon     | Daedeok-gu     | 13.9 (13.0,14.9) | 19.4 (16.8,22.0) | 15.7 (13.5,17.9) | 12.0 (10.0,14.0) | 12.3 (10.2,14.3) | 10.4 (8.5,12.3)  | 9.0 (5.7,13.1)   | Metropolitan |
|        | Ulsan       | Jung-gu        | 15.7 (14.7,16.8) | 22.0 (19.3,24.7) | 15.4 (13.1,17.6) | 13.9 (11.7,16.2) | 13.7 (11.6,15.8) | 13.7 (11.5,15.9) | 8.3 (5.7,12.1)   | Metropolitan |
|        | Ulsan       | Nam-gu         | 13.1 (12.1,14.1) | 17.8 (14.9,20.7) | 13.6 (11.3,15.9) | 12.3 (10.0,14.5) | 11.5 (9.4,13.6)  | 10.8 (8.7,13.0)  | 7.0 (4.9,10.7)   | Metropolitan |
|        | Ulsan       | Dong-gu        | 12.5 (11.5,13.5) | 19.6 (16.7,22.5) | 14.4 (11.9,16.9) | 11.0 (8.9,13.1)  | 8.9 (7.0,10.8)   | 9.3 (7.2,11.4)   | 10.3 (7.8,13.4)  | Metropolitan |
|        | Ulsan       | Buk-gu         | 12.3 (11.3,13.4) | 15.8 (13.1,18.5) | 14.2 (11.8,16.6) | 12.6 (10.3,15.0) | 10.1 (8.0,12.2)  | 8.8 (6.8,10.9)   | 7.0 (4.3,10.3)   | Metropolitan |
|        | Ulsan       | Ulju-gun       | 17.4 (16.4,18.5) | 25.4 (22.6,28.3) | 18.7 (16.3,21.1) | 15.3 (13.2,17.5) | 13.8 (11.8,15.8) | 14.6 (12.5,16.7) | 10.8 (7.8,14.4)  | Rural        |
|        | Sejong      | Sejong         | 17.0 (16.1,18.0) | 24.0 (21.4,26.7) | 18.2 (16.0,20.4) | 16.9 (14.8,19.1) | 14.0 (12.1,15.9) | 12.4 (10.6,14.3) | 11.6 (8.1,14.5)  | Metropolitan |
|        | Gyeonggi-do | Jangan-gu      | 13.6 (12.7,14.6) | 18.5 (16.0,21.0) | 15.8 (13.5,18.0) | 12.4 (10.3,14.4) | 11.7 (9.7,13.7)  | 9.7 (7.8,11.5)   | 8.8 (6.1,12.1)   | Metropolitan |
|        | Gyeonggi-do | Gwonseon-gu    | 14.0 (12.9,15.0) | 20.2 (17.4,22.9) | 14.1 (11.8,16.4) | 13.1 (11.0,15.3) | 11.8 (9.7,13.9)  | 10.7 (8.7,12.8)  | 9.5 (5.7,11.7)   | Metropolitan |
|        | Gyeonggi-do | Paldal-gu      | 14.1 (13.2,15.1) | 20.4 (17.7,23.0) | 14.7 (12.5,16.9) | 12.1 (10.1,14.1) | 11.9 (9.9,13.9)  | 11.8 (9.7,13.8)  | 8.6 (5.5,12.5)   | Metropolitan |
|        | Gyeonggi-do | Yeongtong-gu   | 11.2 (10.1,12.2) | 14.9 (12.1,17.6) | 10.5 (8.2,12.7)  | 9.6 (7.4,11.7)   | 10.8 (8.5,13.2)  | 10.3 (8.0,12.7)  | 4.6 (2.3,10.1)   | Metropolitan |
|        | Gyeonggi-do | Sujeong-gu     | 15.7 (14.6,16.7) | 22.0 (19.3,22.7) | 16.8 (14.5,19.1) | 14.1 (11.9,16.3) | 13.6 (11.6,15.7) | 11.8 (9.8,13.9)  | 10.2 (7.8,14.6)  | Metropolitan |
|        | Gyeonggi-do | Jungwon-gu     | 16.6 (15.5,17.6) | 24.1 (21.2,26.9) | 17.3 (15.0,19.7) | 14.6 (12.4,16.8) | 13.8 (11.6,15.9) | 13.3 (11.2,15.4) | 10.8 (7.7,14.3)  | Metropolitan |
|        | Gyeonggi-do | Bundang-gu     | 8.1 (7.3,8.8)    | 11.0 (9.1,13.0)  | 8.2 (6.5,9.8)    | 6.7 (5.2,8.1)    | 7.5 (5.9,9.1)    | 7.0 (5.4,8.6)    | 4.0 (0.9,6.1)    | Metropolitan |
|        | Gyeonggi-do | Uijeongbu-si   | 15.2 (14.2,16.1) | 23.4 (20.6,26.1) | 17.0 (14.7,19.3) | 12.7 (10.7,14.7) | 11.9 (10.0,13.8) | 11.5 (9.6,13.3)  | 11.9 (8.2,14.6)  | Urban        |
|        | Gyeonggi-do | Manan-gu       | 13.6 (12.7,14.6) | 20.1 (17.5,22.7) | 14.8 (12.6,17.0) | 12.0 (10.1,13.9) | 11.2 (9.3,13.1)  | 10.6 (8.7,12.4)  | 9.5 (7.4,13.4)   | Metropolitan |
|        | Gyeonggi-do | Dongan-gu      | 11.8 (10.9,12.7) | 15.8 (13.4,18.3) | 12.1 (10.0,14.3) | 11.3 (9.4,13.2)  | 9.2 (7.4,11.0)   | 10.6 (8.7,12.6)  | 5.2 (0.6,6.4)    | Metropolitan |
|        | Gyeonggi-do | Wonmi-gu       | 14.1 (13.0,15.1) | 19.9 (17.1,22.6) | 15.1 (12.7,17.6) | 12.2 (10.2,14.3) | 12.0 (9.9,14.1)  | 11.6 (9.5,13.6)  | 8.3 (4.6,10.8)   | Metropolitan |
|        | Gyeonggi-do | Sosa-gu        | 14.2 (13.2,15.2) | 20.0 (17.3,22.7) | 14.8 (12.6,17.0) | 13.3 (11.2,15.4) | 12.7 (10.6,14.7) | 10.8 (8.9,12.7)  | 9.2 (7.4,13.6)   | Metropolitan |
|        | Gyeonggi-do | Ojeong-gu      | 15.2 (14.2,16.2) | 23.7 (20.8,26.5) | 15.6 (13.3,17.8) | 11.7 (9.7,13.6)  | 12.1 (10.1,14.1) | 13.1 (10.9,15.2) | 10.6 (6.2,12.8)  | Metropolitan |
|        | Gyeonggi-do | Gwangmyeong-si | 13.9 (12.9,14.8) | 18.4 (15.8,20.9) | 15.2 (13.0,17.4) | 12.2 (10.2,14.3) | 10.7 (8.8,12.6)  | 13.0 (10.8,15.1) | 5.4 (5.3,13.1)   | Urban        |
|        | Gyeonggi-do | Pyeongtaek-si  | 14.9 (14.2,15.5) | 22.0 (20.1,23.8) | 15.1 (13.5,16.6) | 13.4 (11.9,14.8) | 12.6 (11.2,14.0) | 11.5 (10.2,12.8) | 10.5 (9.2,13.6)  | Urban        |
|        | Gyeonggi-do | Dongducheon-si | 16.3 (15.4,17.3) | 23.8 (21.1,26.5) | 17.3 (15.0,19.6) | 15.4 (13.3,17.5) | 14.0 (12.0,16.0) | 11.5 (9.7,13.4)  | 12.3 (9.0,15.4)  | Urban        |
|        | Gyeonggi-do | Sangnok-gu     | 13.8 (12.7,14.8) | 19.9 (17.2,22.7) | 14.5 (12.1,16.8) | 12.5 (10.3,14.7) | 11.4 (9.4,13.4)  | 10.7 (8.7,12.7)  | 9.2 (8.6,14.6)   | Metropolitan |
|        | Gyeonggi-do | Danwon-gu      | 15.3 (14.2,16.4) | 22.6 (19.5,25.7) | 15.6 (13.1,18.0) | 14.0 (11.6,16.3) | 12.6 (10.3,14.9) | 12.1 (9.8,14.3)  | 10.5 (7.0,13.4)  | Metropolitan |
|        | Gyeonggi-do | Deogyang-gu    | 15.4 (14.4,16.4) | 23.7 (20.9,26.4) | 16.4 (14.2,18.7) | 13.1 (11.0,15.1) | 12.0 (10.1,13.9) | 11.9 (9.9,13.9)  | 11.8 (6.3,12.5)  | Metropolitan |
|        | Gyeonggi-do | Ilсандong-gu   | 12.5 (11.6,13.5) | 16.9 (14.4,19.4) | 13.4 (11.2,15.5) | 12.9 (10.8,14.9) | 11.1 (9.2,13.0)  | 8.7 (6.9,10.4)   | 8.2 (5.6,11.8)   | Metropolitan |
|        | Gyeonggi-do | Ilсанseo-gu    | 11.7 (10.8,12.6) | 17.7 (15.2,20.2) | 11.2 (9.3,13.2)  | 10.1 (8.3,12.0)  | 9.4 (7.7,11.1)   | 10.5 (8.6,12.4)  | 7.2 (2.3,8.1)    | Metropolitan |
|        | Gyeonggi-do | Gwacheon-si    | 11.9 (11.0,12.8) | 16.7 (14.3,19.1) | 11.6 (9.7,13.5)  | 11.1 (9.2,13.0)  | 10.9 (9.0,12.8)  | 9.4 (7.6,11.1)   | 7.3 (3.9,9.7)    | Urban        |
|        | Gyeonggi-do | Guri-si        | 15.3 (14.3,16.4) | 21.4 (18.7,24.2) | 15.6 (13.3,17.9) | 14.5 (12.3,16.8) | 14.5 (12.3,16.6) | 10.6 (8.7,12.6)  | 10.8 (5.4,11.6)  | Urban        |
|        | Gyeonggi-do | Namyangju-si   | 14.8 (13.8,15.8) | 19.6 (17.0,22.1) | 15.6 (13.4,17.9) | 13.3 (11.3,15.3) | 12.5 (10.5,14.5) | 13.3 (11.2,15.4) | 6.3 (3.7,10.1)   | Urban        |
|        | Gyeonggi-do | Osan-si        | 13.9 (12.9,15.0) | 17.6 (14.9,20.3) | 13.2 (10.9,15.6) | 13.3 (11.1,15.5) | 14.3 (11.9,16.7) | 11.4 (9.2,13.6)  | 6.2 (1.9,8.3)    | Urban        |
|        | Gyeonggi-do | Siheung-si     | 14.7 (13.6,15.8) | 19.7 (16.9,22.5) | 15.8 (13.3,18.2) | 12.8 (10.6,14.9) | 13.8 (11.5,16.1) | 11.5 (9.3,13.6)  | 8.2 (5.7,13.3)   | Urban        |
|        | Gyeonggi-do | Gunpo-si       | 14.5 (13.5,15.5) | 21.9 (19.1,24.7) | 13.5 (11.4,15.6) | 12.2 (10.2,14.3) | 13.4 (11.2,15.5) | 11.9 (9.8,13.9)  | 10.0 (5.6,11.8)  | Urban        |
|        | Gyeonggi-do | Uiwang-si      | 12.8 (11.9,13.7) | 18.2 (15.7,20.6) | 13.8 (11.6,16.0) | 10.4 (8.6,12.3)  | 11.2 (9.4,13.1)  | 10.7 (8.8,12.6)  | 7.5 (5.1,11.1)   | Urban        |
|        | Gyeonggi-do | Hanam-si       | 14.6 (13.7,15.6) | 18.9 (16.4,21.4) | 15.8 (13.6,18.1) | 13.6 (11.5,15.7) | 12.9 (11.0,14.9) | 12.4 (10.4,14.4) | 6.5 (3.7,10.3)   | Urban        |
|        | Gyeonggi-do | Cheoin-gu      | 13.4 (12.5,14.3) | 18.2 (15.8,20.6) | 14.4 (12.3,16.5) | 12.6 (10.7,14.5) | 12.2 (10.2,14.1) | 9.8 (8.0,11.5)   | 8.4 (1.7,8.9)    | Metropolitan |
|        | Gyeonggi-do | Giheung-gu     | 11.0 (10.2,11.9) | 16.2 (13.8,18.6) | 10.9 (9.0,12.8)  | 10.2 (8.4,12.1)  | 10.0 (8.1,11.8)  | 8.1 (6.4,9.7)    | 8.1 (4.5,10.1)   | Metropolitan |
|        | Gyeonggi-do | Suji-gu        | 10.0 (9.1,10.8)  | 12.0 (9.9,14.0)  | 10.1 (8.2,11.9)  | 10.4 (8.5,12.2)  | 8.4 (6.7,10.0)   | 9.2 (7.5,11.0)   | 2.8 (-0.1,5.5)   | Metropolitan |
|        | Gyeonggi-do | Paju-si        | 14.7 (13.8,15.7) | 21.7 (19.0,24.4) | 15.4 (13.3,17.6) | 13.4 (11.4,15.4) | 11.6 (9.7,13.4)  | 12.0 (10.1,13.9) | 9.7 (5.4,11.6)   | Urban        |
|        | Gyeonggi-do | Icheon-si      | 15.4 (14.4,16.3) | 21.3 (18.7,23.9) | 16.1 (13.9,18.3) | 13.4 (11.4,15.5) | 13.5 (11.4,15.5) | 12.5 (10.5,14.5) | 8.8 (6.4,12.6)   | Urban        |
|        | Gyeonggi-do | Anseong-si     | 15.3 (14.3,16.2) | 20.9 (18.4,23.3) | 15.7 (13.6,17.9) | 13.5 (11.5,15.5) | 13.8 (11.8,15.8) | 12.2 (10.4,14.1) | 8.7 (4.0,11.4)   | Urban        |
|        | Gyeonggi-do | Gimpo-si       | 11.9 (11.1,12.8) | 15.7 (13.4,17.9) | 12.6 (10.6,14.6) | 11.2 (9.4,13.1)  | 10.8 (9.0,12.6)  | 9.5 (7.8,11.3)   | 6.2 (2.9,8.5)    | Urban        |
|        | Gyeonggi-do | Hwaseong-si    | 13.6 (12.7,14.6) | 19.5 (16.9,22.1) | 14.8 (12.5,17.1) | 12.8 (10.7,14.9) | 11.9 (9.9,13.9)  | 9.4 (7.5,11.2)   | 10.1 (8.0,13.8)  | Urban        |
|        | Gyeonggi-do | Gwangju-si     | 13.2 (12.3,14.1) | 17.4 (15.0,19.8) | 14.3 (12.2,16.4) | 12.5 (10.5,14.4) | 10.6 (8.7,12.4)  | 11.1 (9.2,13.0)  | 6.3 (4.2,11.2)   | Urban        |
|        | Gyeonggi-do | Yangju-si      | 15.5 (14.5,16.5) | 21.6 (19.0,24.3) | 15.8 (13.6,18.0) | 13.3 (11.3,15.3) | 14.7 (12.6,16.7) | 12.5 (10.5,14.5) | 9.1 (6.1,12.3)   | Urban        |
|        | Gyeonggi-do | Pocheon-si     | 16.6 (15.6,17.6) | 23.8 (21.2,26.5) | 17.7 (15.5,19.9) | 15.2 (13.2,17.3) | 14.1 (12.2,16.0) | 12.4 (10.6,14.3) | 11.4 (6.9,13.3)  | Urban        |
|        | Gyeonggi-do | Yeuju-gun      | 16.6 (15.6,17.5) | 21.4 (19.0,23.9) | 18.4 (16.2,20.6) | 15.1 (13.1,17.1) | 14.4 (12.5,16.4) | 13.8 (11.8,15.7) | 7.6 (2.9,9.3)    | Urban        |
|        | Gyeonggi-do | Yeoncheon-gun  | 15.7 (14.8,16.6) | 22.9 (20.4,25.5) | 16.5 (14.5,18.5) | 15.1 (13.1,17.0) | 13.5 (11.6,15.3) | 10.6 (9.0,12.2)  | 12.3 (8.2,14.4)  | Rural        |
|        | Gyeonggi-do | Gapyeong-gun   | 14.9 (14.0,15.8) | 23.2 (20.6,25.8) | 16.6 (14.6,18.7) | 13.5 (11.7,15.4) | 10.8 (9.2,12.5)  | 10.5 (8.8,12.1)  | 12.7 (9.4,15.6)  | Rural        |

(continued to the next page)

Appendix 4. Continued

| Gender | Provinces         | Districts       | Overall          | Q1 (lowest)      | Q2               | Q3               | Q4               | Q5 (highest)     | Q1-Q5            | Urbanity     |
|--------|-------------------|-----------------|------------------|------------------|------------------|------------------|------------------|------------------|------------------|--------------|
|        | Gyeonggi-do       | Yangpyeong-gun  | 15.9 (15.0,16.8) | 20.4 (18.0,22.8) | 18.0 (15.8,20.1) | 14.7 (12.7,16.6) | 15.0 (13.1,17.0) | 11.4 (9.6,13.1)  | 9.0 (5.8,12.0)   | Rural        |
|        | Gangwon-do        | Chuncheon-si    | 13.9 (13.0,14.8) | 22.4 (19.8,25.0) | 15.4 (13.3,17.5) | 11.7 (9.9,13.5)  | 11.3 (9.5,13.1)  | 9.2 (7.6,10.8)   | 13.2 (9.0,15.8)  | Urban        |
|        | Gangwon-do        | Wonju-si        | 14.6 (13.7,15.6) | 21.7 (19.1,24.4) | 17.4 (15.1,19.7) | 11.5 (9.7,13.4)  | 12.7 (10.7,14.6) | 10.0 (8.2,11.8)  | 11.7 (7.9,14.1)  | Urban        |
|        | Gangwon-do        | Gangneung-si    | 15.3 (14.4,16.2) | 22.6 (20.0,25.2) | 16.3 (14.2,18.3) | 13.6 (11.7,15.4) | 13.2 (11.3,15.1) | 11.3 (9.5,13.1)  | 11.3 (9.3,15.5)  | Urban        |
|        | Gangwon-do        | Donghae-si      | 15.3 (14.3,16.2) | 22.6 (20.0,25.2) | 16.5 (14.4,18.6) | 14.1 (12.1,16.1) | 11.8 (10.0,13.6) | 11.6 (9.7,13.4)  | 11.0 (8.6,14.8)  | Urban        |
|        | Gangwon-do        | Taebaek-si      | 20.4 (19.4,21.5) | 28.4 (25.5,31.2) | 22.4 (20.0,24.9) | 19.9 (17.7,22.2) | 15.9 (13.9,18.0) | 15.6 (13.5,17.6) | 12.8 (10.0,17.0) | Urban        |
|        | Gangwon-do        | Sokcho-si       | 17.3 (16.3,18.3) | 26.1 (23.3,28.9) | 17.8 (15.6,20.0) | 15.2 (13.1,17.2) | 13.3 (11.4,15.2) | 14.5 (12.4,16.6) | 11.6 (8.0,14.6)  | Urban        |
|        | Gangwon-do        | Samcheok-si     | 17.5 (16.5,18.4) | 27.7 (24.8,30.6) | 18.3 (16.1,20.5) | 16.5 (14.5,18.5) | 13.5 (11.6,15.4) | 11.9 (10.2,13.7) | 15.8 (10.8,17.4) | Urban        |
|        | Gangwon-do        | Hongcheon-gun   | 15.1 (14.2,16.0) | 22.4 (19.9,24.9) | 16.5 (14.4,18.5) | 13.6 (11.8,15.4) | 12.2 (10.4,14.0) | 10.2 (7.9,14.5)  | 10.2 (7.9,14.5)  | Rural        |
|        | Gangwon-do        | Hongseong-gun   | 17.4 (16.5,18.4) | 23.7 (21.0,26.3) | 18.8 (16.6,21.0) | 17.0 (14.9,19.1) | 15.1 (13.1,17.1) | 12.6 (10.7,14.5) | 9.6 (7.6,14.0)   | Rural        |
|        | Gangwon-do        | Yeongwol-gun    | 18.8 (17.8,19.8) | 28.1 (25.1,31.0) | 20.6 (18.3,22.9) | 15.9 (13.9,17.8) | 15.6 (13.7,17.6) | 14.2 (12.3,16.1) | 13.9 (10.3,17.1) | Rural        |
|        | Gangwon-do        | Pyeongchang-gun | 16.3 (15.3,17.2) | 24.2 (21.6,26.8) | 17.4 (15.4,19.5) | 13.9 (12.1,15.8) | 14.4 (12.5,16.3) | 11.6 (9.8,13.3)  | 12.6 (7.9,14.3)  | Rural        |
|        | Gangwon-do        | Jeongseon-gun   | 19.9 (18.9,20.9) | 27.4 (24.6,30.2) | 20.7 (18.4,22.9) | 20.0 (17.7,22.2) | 18.0 (15.9,20.2) | 13.7 (11.8,15.6) | 13.7 (11.7,18.5) | Rural        |
|        | Gangwon-do        | Cheorwon-gun    | 14.7 (13.8,15.6) | 23.5 (20.9,26.1) | 15.3 (13.4,17.3) | 13.3 (11.4,15.1) | 11.5 (9.7,13.2)  | 10.1 (8.4,11.7)  | 13.4 (11.3,17.7) | Rural        |
|        | Gangwon-do        | Hwacheon-gun    | 15.6 (14.6,16.5) | 22.5 (19.8,25.2) | 17.0 (14.8,19.2) | 13.6 (11.7,15.5) | 13.5 (11.5,15.4) | 11.6 (9.9,13.4)  | 10.9 (8.9,15.3)  | Rural        |
|        | Gangwon-do        | Yanggu-gun      | 16.1 (15.2,17.1) | 22.9 (20.2,25.5) | 16.8 (14.6,19.0) | 14.7 (12.8,16.7) | 13.2 (11.3,15.1) | 13.3 (11.4,15.2) | 9.6 (5.9,12.5)   | Rural        |
|        | Gangwon-do        | Inje-gun        | 15.6 (14.7,16.6) | 23.1 (20.5,25.7) | 15.5 (13.5,17.6) | 14.6 (12.7,16.6) | 13.1 (11.2,15.0) | 11.6 (9.8,13.5)  | 11.5 (8.6,15.0)  | Rural        |
|        | Gangwon-do        | Goseong-gun     | 15.4 (14.5,16.3) | 21.3 (18.7,23.8) | 17.8 (15.5,20.1) | 14.8 (12.8,16.8) | 12.7 (10.9,14.5) | 10.6 (8.9,12.3)  | 10.7 (7.9,14.1)  | Rural        |
|        | Gangwon-do        | Yangyang-gun    | 15.1 (14.2,16.0) | 22.6 (20.0,25.2) | 17.2 (15.1,19.3) | 13.3 (11.4,15.2) | 12.9 (11.1,14.7) | 9.5 (8.0,11.0)   | 13.1 (9.7,15.9)  | Rural        |
|        | Chungcheongbuk-do | Cheongju-si     | 13.8 (13.2,14.3) | 20.7 (19.1,22.2) | 15.4 (14.1,16.8) | 12.1 (11.0,13.2) | 11.2 (10.2,12.3) | 10.2 (9.2,11.2)  | 10.5 (8.2,11.8)  | Metropolitan |
|        | Chungcheongbuk-do | Chungju-si      | 17.5 (16.5,18.5) | 25.0 (22.3,27.7) | 20.3 (18.0,22.6) | 15.4 (13.4,17.5) | 13.8 (11.9,15.7) | 13.2 (11.3,15.2) | 11.8 (9.1,15.5)  | Urban        |
|        | Chungcheongbuk-do | Jecheon-si      | 15.1 (14.2,16.0) | 21.9 (19.4,24.4) | 15.2 (13.2,17.1) | 14.6 (12.7,16.6) | 12.6 (10.8,14.4) | 11.5 (9.7,13.3)  | 10.4 (7.7,14.1)  | Urban        |
|        | Chungcheongbuk-do | Boeun-gun       | 17.9 (17.0,18.9) | 26.8 (23.9,29.8) | 20.6 (18.3,23.0) | 15.2 (13.4,17.1) | 14.5 (12.5,16.4) | 13.6 (11.7,15.5) | 13.2 (10.6,17.4) | Rural        |
|        | Chungcheongbuk-do | Okcheon-gun     | 16.3 (15.4,17.2) | 21.2 (18.8,23.7) | 18.5 (16.4,20.7) | 15.3 (13.4,17.3) | 14.3 (12.4,16.1) | 12.2 (10.3,14.0) | 9.0 (5.4,11.8)   | Rural        |
|        | Chungcheongbuk-do | Yeongdong-gun   | 16.3 (15.4,17.2) | 24.9 (22.2,27.5) | 16.9 (14.8,18.9) | 14.3 (12.5,16.1) | 13.1 (11.4,14.9) | 12.5 (10.7,14.3) | 12.4 (8.4,14.8)  | Rural        |
|        | Chungcheongbuk-do | Jincheon-gun    | 16.8 (15.9,17.8) | 23.8 (21.1,26.5) | 15.1 (13.0,17.2) | 16.8 (14.6,18.9) | 13.5 (11.6,15.4) | 15.2 (13.1,17.2) | 8.6 (4.6,11.4)   | Rural        |
|        | Chungcheongbuk-do | Goesan-gun      | 15.6 (14.7,16.5) | 21.2 (18.7,23.6) | 15.4 (13.4,17.5) | 14.9 (12.9,16.9) | 14.1 (12.1,16.0) | 12.6 (10.8,14.5) | 8.6 (6.7,12.9)   | Rural        |
|        | Chungcheongbuk-do | Eumseong-gun    | 17.5 (16.5,18.4) | 25.2 (22.4,28.0) | 19.5 (17.1,21.8) | 16.8 (14.8,18.8) | 13.5 (11.7,15.2) | 12.6 (10.8,14.4) | 12.6 (9.8,16.4)  | Rural        |
|        | Chungcheongbuk-do | Danyang-gun     | 17.7 (16.7,18.6) | 26.9 (24.1,29.7) | 16.6 (14.4,18.7) | 15.7 (13.7,17.7) | 14.3 (12.5,16.2) | 15.4 (13.3,17.5) | 11.5 (6.2,13.0)  | Rural        |
|        | Chungcheongbuk-do | Jeungpyeong-gun | 14.9 (14.1,15.8) | 22.4 (19.9,24.9) | 14.8 (13.0,16.6) | 14.1 (12.3,15.8) | 13.1 (11.3,14.8) | 10.4 (8.8,12.0)  | 12.0 (9.3,15.5)  | Rural        |
|        | Chungcheongnam-do | Cheonan-si      | 16.0 (14.9,17.0) | 23.0 (20.0,26.0) | 17.9 (15.4,20.4) | 14.5 (12.3,16.8) | 13.5 (11.3,15.7) | 11.6 (9.6,13.7)  | 11.4 (8.3,14.7)  | Metropolitan |
|        | Chungcheongnam-do | Gongju-si       | 17.2 (16.2,18.1) | 25.3 (22.6,28.0) | 18.0 (15.8,20.1) | 16.6 (14.5,18.6) | 14.3 (12.4,16.1) | 11.9 (10.1,13.7) | 13.4 (10.3,16.7) | Urban        |
|        | Chungcheongnam-do | Boryeong-si     | 19.8 (18.8,20.8) | 30.1 (27.1,33.1) | 22.5 (20.0,24.9) | 15.7 (13.8,17.6) | 16.9 (14.8,19.0) | 14.5 (12.5,16.4) | 15.6 (11.9,18.9) | Urban        |
|        | Chungcheongnam-do | Asan-si         | 15.9 (14.9,16.9) | 24.3 (21.4,27.2) | 16.7 (14.4,18.9) | 14.2 (12.1,16.3) | 12.8 (10.8,14.8) | 11.7 (9.8,13.6)  | 12.6 (9.3,15.7)  | Urban        |
|        | Chungcheongnam-do | Seosan-si       | 16.0 (15.1,17.0) | 21.8 (19.3,24.3) | 17.2 (15.1,19.4) | 14.5 (12.5,16.5) | 14.3 (12.3,16.3) | 12.5 (10.6,14.3) | 9.3 (6.2,12.4)   | Urban        |
|        | Chungcheongnam-do | Nonsan-si       | 17.1 (16.1,18.0) | 26.1 (23.3,28.8) | 17.6 (15.6,19.7) | 15.2 (13.3,17.2) | 14.1 (12.2,16.0) | 12.2 (10.4,14.0) | 13.9 (10.9,17.7) | Urban        |
|        | Chungcheongnam-do | Gyeryong-si     | 13.5 (12.5,14.5) | 18.7 (16.0,21.4) | 15.7 (13.3,18.1) | 11.3 (9.2,13.4)  | 12.0 (9.9,14.1)  | 10.0 (8.0,11.9)  | 8.7 (4.7,10.7)   | Urban        |
|        | Chungcheongnam-do | Dangjin-si      | 16.4 (15.4,17.3) | 23.6 (21.0,26.2) | 16.4 (14.3,18.5) | 16.2 (14.1,18.4) | 13.8 (11.9,15.7) | 12.3 (10.4,14.1) | 11.3 (6.3,12.7)  | Rural        |
|        | Chungcheongnam-do | Geumsan-gun     | 16.8 (15.9,17.7) | 22.9 (20.4,25.5) | 19.7 (17.5,21.9) | 15.2 (13.4,17.1) | 13.9 (12.1,15.7) | 12.1 (10.4,13.7) | 10.8 (6.9,13.3)  | Rural        |
|        | Chungcheongnam-do | Buyeo-gun       | 15.8 (14.9,16.7) | 22.9 (20.3,25.6) | 17.7 (15.6,19.8) | 13.6 (11.9,15.3) | 14.0 (12.2,15.9) | 11.2 (9.6,12.9)  | 11.7 (7.6,13.8)  | Rural        |
|        | Chungcheongnam-do | Seocheon-gun    | 17.0 (16.1,18.0) | 25.2 (22.4,28.0) | 17.0 (14.9,19.1) | 15.2 (13.3,17.1) | 15.1 (13.1,17.0) | 13.1 (11.2,15.0) | 12.1 (7.4,14.0)  | Rural        |
|        | Chungcheongnam-do | Cheongyang-gun  | 15.2 (14.4,16.1) | 22.8 (20.1,25.4) | 16.6 (14.6,18.6) | 15.3 (13.4,17.2) | 11.9 (10.1,13.6) | 9.9 (8.4,11.3)   | 12.9 (10.8,17.4) | Rural        |
|        | Chungcheongnam-do | Hongseong-gun   | 16.8 (15.9,17.7) | 22.8 (20.3,25.4) | 18.1 (15.9,20.2) | 15.6 (13.6,17.5) | 14.5 (12.6,16.5) | 13.1 (11.3,14.9) | 9.7 (8.0,14.4)   | Rural        |
|        | Chungcheongnam-do | Yesan-gun       | 15.6 (14.8,16.5) | 23.9 (21.3,26.6) | 16.9 (14.8,18.9) | 13.3 (11.5,15.0) | 12.5 (10.8,14.2) | 12.3 (10.5,14.1) | 11.6 (9.0,15.6)  | Rural        |
|        | Chungcheongnam-do | Taean-gun       | 15.9 (15.0,16.8) | 20.8 (18.4,23.2) | 17.9 (15.8,20.1) | 15.6 (13.7,17.6) | 13.4 (11.6,15.3) | 11.7 (10.0,13.5) | 9.1 (5.4,11.6)   | Urban        |
|        | Jeollabuk-do      | Jeonju-si       | 14.0 (13.1,15.0) | 21.6 (19.0,24.3) | 14.9 (12.8,17.1) | 12.5 (10.5,14.4) | 11.5 (9.7,13.4)  | 10.3 (8.5,12.1)  | 11.3 (9.9,16.7)  | Metropolitan |
|        | Jeollabuk-do      | Gunsan-si       | 17.7 (16.7,18.7) | 26.2 (23.4,29.0) | 17.5 (15.3,19.7) | 15.6 (13.5,17.7) | 15.9 (13.8,18.1) | 13.7 (11.8,15.7) | 12.5 (10.6,18.6) | Urban        |
|        | Jeollabuk-do      | Iksan-si        | 18.5 (17.4,19.5) | 29.0 (26.1,31.9) | 18.4 (16.2,20.7) | 17.1 (14.9,19.2) | 14.5 (12.6,16.5) | 13.4 (11.5,15.3) | 15.6 (12.9,19.7) | Urban        |
|        | Jeollabuk-do      | Jeongeup-si     | 19.0 (18.0,20.0) | 29.6 (26.6,32.5) | 19.0 (16.8,21.2) | 17.9 (15.8,20.0) | 13.9 (12.0,15.7) | 15.0 (13.0,17.0) | 14.6 (10.5,17.3) | Urban        |
|        | Jeollabuk-do      | Namwon-si       | 18.4 (17.5,19.4) | 25.8 (23.1,28.5) | 20.9 (18.6,23.2) | 17.1 (15.0,19.2) | 13.5 (11.8,15.3) | 15.1 (13.2,17.0) | 10.7 (10.5,18.1) | Urban        |
|        | Jeollabuk-do      | Gimje-si        | 17.7 (16.7,18.7) | 26.4 (23.6,29.2) | 17.9 (15.8,20.0) | 15.7 (13.7,17.6) | 15.7 (13.7,17.7) | 13.2 (11.3,15.1) | 13.2 (6.3,14.7)  | Urban        |
|        | Jeollabuk-do      | Wanju-gun       | 16.7 (15.8,17.6) | 24.3 (21.7,27.0) | 19.4 (17.2,21.6) | 15.4 (13.5,17.3) | 12.2 (10.4,13.9) | 12.5 (10.8,14.2) | 11.8 (8.7,17.3)  | Rural        |
|        | Jeollabuk-do      | Jinan-gun       | 16.2 (15.2,17.1) | 23.0 (20.3,25.8) | 19.6 (17.3,21.9) | 13.7 (12.0,15.4) | 14.3 (12.4,16.2) | 10.4 (8.8,12.0)  | 12.6 (11.8,21.6) | Rural        |
|        | Jeollabuk-do      | Muji-gun        | 18.3 (17.3,19.3) | 25.6 (22.8,28.3) | 20.7 (18.3,23.0) | 16.7 (14.7,18.7) | 14.9 (13.0,16.9) | 13.4 (11.5,15.3) | 12.2 (7.9,14.7)  | Rural        |
|        | Jeollabuk-do      | Jangsu-gun      | 18.0 (17.0,19.0) | 24.6 (21.8,27.4) | 19.7 (17.4,21.9) | 16.2 (14.3,18.2) | 13.9 (12.1,15.8) | 16.0 (13.9,18.0) | 8.6 (5.7,13.5)   | Rural        |
|        | Jeollabuk-do      | Imsil-gun       | 17.7 (16.7,18.7) | 24.2 (21.3,27.1) | 17.2 (15.2,19.2) | 22.2 (19.7,24.6) | 13.8 (11.9,15.7) | 11.0 (9.5,12.6)  | 13.2 (11.1,18.3) | Rural        |
|        | Jeollabuk-do      | Sunchang-gun    | 17.7 (16.7,18.7) | 25.6 (22.8,28.3) | 21.3 (18.8,23.8) | 15.6 (13.8,17.5) | 13.9 (12.0,15.9) | 12.0 (10.3,13.8) | 13.6 (9.7,16.3)  | Rural        |
|        | Jeollabuk-do      | Gochang-gun     | 21.8 (20.7,22.9) | 31.2 (28.0,34.3) | 21.9 (19.6,24.2) | 19.5 (17.2,21.7) | 20.8 (18.4,23.2) | 16.2 (14.2,18.3) | 15.0 (11.3,18.3) | Rural        |
|        | Jeollabuk-do      | Buan-gun        | 19.5 (18.5,20.5) | 30.8 (27.7,33.9) | 20.2 (17.9,22.5) | 18.3 (16.1,20.5) | 12.9 (11.2,14.7) | 15.4 (13.3,17.4) | 15.4 (11.7,19.1) | Rural        |
|        | Jeollanam-do      | Mokpo-si        | 17.2 (16.2,18.2) | 25.6 (22.8,28.4) | 19.5 (17.1,21.9) | 16.6 (14.4,18.7) | 13.7 (11.7,15.6) | 10.9 (9.1,12.7)  | 14.7 (8.9,15.3)  | Urban        |

(continued to the next page)

## Appendix 4. Continued

| Gender | Provinces        | Districts       | Overall          | Q1 (lowest)      | Q2               | Q3               | Q4               | Q5 (highest)     | Q1-Q5            | Urbanity     |
|--------|------------------|-----------------|------------------|------------------|------------------|------------------|------------------|------------------|------------------|--------------|
|        | Jeollanam-do     | Yeosu-si        | 16.0 (15.1,16.9) | 22.7 (20.1,25.2) | 15.7 (13.7,17.7) | 14.7 (12.7,16.7) | 12.5 (10.6,14.3) | 14.6 (12.6,16.6) | 8.1 (4.8,11.2)   | Urban        |
|        | Jeollanam-do     | Suncheon-si     | 14.8 (13.9,15.8) | 21.7 (19.1,24.3) | 17.0 (14.9,19.2) | 12.4 (10.5,14.3) | 12.7 (10.8,14.6) | 10.7 (9.0,12.4)  | 11.0 (10.1,16.3) | Urban        |
|        | Jeollanam-do     | Naju-si         | 17.6 (16.6,18.5) | 28.2 (25.4,31.1) | 18.4 (16.3,20.6) | 15.4 (13.5,17.4) | 13.6 (11.8,15.3) | 12.1 (10.4,13.7) | 16.1 (13.6,20.2) | Urban        |
|        | Jeollanam-do     | Gwangyang-si    | 14.3 (13.3,15.3) | 21.3 (18.6,24.0) | 15.6 (13.4,17.8) | 13.0 (11.0,15.1) | 11.2 (9.3,13.1)  | 10.7 (8.8,12.5)  | 10.6 (6.8,13.0)  | Urban        |
|        | Jeollanam-do     | Damyang-gun     | 17.4 (16.4,18.3) | 25.6 (22.9,28.4) | 18.8 (16.6,21.0) | 15.2 (13.4,17.0) | 13.9 (12.1,15.7) | 13.6 (11.7,15.5) | 12.0 (10.2,16.6) | Rural        |
|        | Jeollanam-do     | Gokseong-gun    | 16.8 (15.9,17.7) | 22.4 (19.8,25.0) | 17.3 (15.3,19.3) | 17.1 (15.0,19.2) | 13.3 (11.6,15.0) | 14.0 (12.1,15.9) | 8.4 (5.9,12.5)   | Rural        |
|        | Jeollanam-do     | Gurye-gun       | 13.4 (12.6,14.2) | 22.1 (19.6,24.7) | 15.7 (13.7,17.7) | 10.4 (9.0,11.9)  | 10.1 (8.6,11.6)  | 9.1 (7.6,10.7)   | 13.0 (10.3,16.5) | Rural        |
|        | Jeollanam-do     | Goheung-gun     | 15.6 (14.7,16.5) | 28.3 (25.1,31.6) | 15.4 (13.5,17.3) | 14.8 (12.9,16.6) | 11.8 (10.2,13.5) | 8.2 (7.0,9.5)    | 20.1 (18.0,24.0) | Rural        |
|        | Jeollanam-do     | Boseong-gun     | 18.2 (17.2,19.1) | 27.8 (24.7,30.8) | 21.0 (18.6,23.3) | 17.3 (15.2,19.3) | 13.7 (11.9,15.5) | 11.2 (9.8,12.7)  | 16.6 (14.1,20.9) | Rural        |
|        | Jeollanam-do     | Hwasun-gun      | 18.9 (17.9,19.9) | 29.2 (26.3,32.1) | 18.4 (16.3,20.5) | 17.1 (16.0,20.3) | 14.3 (12.5,16.2) | 14.7 (12.8,16.7) | 14.5 (11.0,18.0) | Rural        |
|        | Jeollanam-do     | Jangheung-gun   | 15.9 (15.0,16.8) | 26.4 (23.5,29.3) | 16.0 (14.1,18.0) | 13.7 (11.8,15.5) | 11.3 (9.8,12.8)  | 12.7 (10.9,14.6) | 13.7 (9.8,18.0)  | Rural        |
|        | Jeollanam-do     | Gangjin-gun     | 14.2 (13.3,15.1) | 21.7 (19.1,24.3) | 15.1 (13.1,17.0) | 12.6 (10.8,14.4) | 12.2 (10.4,13.9) | 9.8 (8.2,11.3)   | 11.9 (10.8,18.2) | Rural        |
|        | Jeollanam-do     | Haenam-gun      | 17.9 (16.9,18.8) | 25.8 (23.0,28.7) | 17.8 (15.7,19.8) | 16.4 (14.5,18.3) | 15.4 (13.4,17.4) | 14.6 (12.7,16.5) | 11.2 (8.0,15.4)  | Rural        |
|        | Jeollanam-do     | Yeongam-gun     | 17.5 (16.6,18.5) | 25.9 (23.2,28.6) | 19.2 (17.0,21.4) | 16.1 (14.1,18.1) | 15.0 (13.0,16.9) | 11.7 (10.1,13.4) | 14.2 (10.8,17.2) | Rural        |
|        | Jeollanam-do     | Muan-gun        | 15.2 (14.3,16.1) | 20.3 (17.9,22.7) | 15.7 (13.7,17.6) | 16.0 (14.0,18.0) | 11.8 (10.2,13.5) | 12.5 (10.6,14.3) | 7.8 (6.0,12.2)   | Rural        |
|        | Jeollanam-do     | Hampyeong-gun   | 19.2 (18.2,20.2) | 28.6 (25.6,31.6) | 19.7 (17.5,22.0) | 17.1 (15.0,19.3) | 16.3 (14.3,18.4) | 14.3 (12.3,16.2) | 14.3 (11.6,18.4) | Rural        |
|        | Jeollanam-do     | Yeonggwang-gun  | 19.3 (18.3,20.3) | 29.0 (26.1,31.8) | 21.7 (19.4,24.0) | 17.7 (15.6,19.8) | 15.1 (13.3,16.9) | 13.4 (11.6,15.3) | 15.6 (13.8,20.6) | Rural        |
|        | Jeollanam-do     | Jangseong-gun   | 17.2 (16.3,18.2) | 26.0 (23.2,28.8) | 18.2 (16.1,20.4) | 15.0 (13.1,16.9) | 15.0 (13.1,16.9) | 12.3 (10.6,14.1) | 13.7 (6.3,12.9)  | Rural        |
|        | Jeollanam-do     | Wando-gun       | 17.4 (16.5,18.4) | 27.4 (24.5,30.2) | 19.3 (17.2,21.4) | 14.3 (12.5,16.2) | 14.8 (13.0,16.6) | 11.4 (9.7,13.0)  | 16.0 (13.8,20.2) | Rural        |
|        | Jeollanam-do     | Jindo-gun       | 18.5 (17.6,19.5) | 28.4 (25.4,31.4) | 20.1 (17.8,22.3) | 16.7 (14.8,18.7) | 14.6 (12.8,16.4) | 13.0 (11.2,14.9) | 15.4 (12.7,19.3) | Rural        |
|        | Jeollanam-do     | Sinan-gun       | 19.8 (18.7,20.8) | 25.9 (23.2,28.6) | 23.3 (20.8,25.9) | 17.2 (15.1,19.3) | 17.5 (15.4,19.5) | 14.7 (12.7,16.6) | 11.2 (11.8,19.4) | Rural        |
|        | Gyeongsangbuk-do | Nam-gu          | 17.1 (16.1,18.1) | 26.5 (23.7,29.3) | 17.7 (15.4,19.9) | 15.9 (13.7,18.1) | 12.6 (10.7,14.6) | 12.8 (10.8,14.7) | 13.7 (10.1,16.7) | Metropolitan |
|        | Gyeongsangbuk-do | Buk-gu          | 15.5 (14.6,16.5) | 23.3 (20.6,26.0) | 15.7 (13.6,17.8) | 14.2 (12.2,16.2) | 12.7 (10.8,14.7) | 11.8 (9.9,13.7)  | 11.5 (8.1,14.5)  | Metropolitan |
|        | Gyeongsangbuk-do | Gyeongju-si     | 16.9 (16.0,17.9) | 24.4 (21.8,27.0) | 17.8 (15.6,20.0) | 16.3 (14.2,18.3) | 13.9 (12.1,15.8) | 12.7 (10.9,14.5) | 11.7 (8.5,14.9)  | Urban        |
|        | Gyeongsangbuk-do | Gimcheon-si     | 16.2 (15.3,17.2) | 22.4 (19.9,24.8) | 17.3 (15.3,19.4) | 16.1 (14.0,18.1) | 12.7 (10.9,14.6) | 12.5 (10.6,14.3) | 9.9 (6.2,12.6)   | Urban        |
|        | Gyeongsangbuk-do | Andong-si       | 16.9 (15.9,17.8) | 25.6 (22.9,28.3) | 18.7 (16.5,20.9) | 15.8 (13.8,17.7) | 12.6 (10.8,14.4) | 12.2 (10.5,14.0) | 13.4 (8.9,15.3)  | Urban        |
|        | Gyeongsangbuk-do | Gumi-si         | 17.1 (16.2,17.9) | 25.7 (23.3,28.0) | 18.2 (16.2,20.1) | 15.2 (13.4,17.0) | 14.3 (12.6,16.1) | 13.3 (11.8,14.9) | 12.4 (8.5,13.1)  | Urban        |
|        | Gyeongsangbuk-do | Yeongju-si      | 17.5 (16.6,18.5) | 26.5 (23.7,29.3) | 18.0 (15.9,20.1) | 16.9 (14.9,19.0) | 14.2 (12.3,16.0) | 12.7 (10.9,14.4) | 13.8 (9.9,16.5)  | Urban        |
|        | Gyeongsangbuk-do | Yeongscheon-si  | 19.3 (18.3,20.3) | 25.4 (22.7,28.1) | 22.3 (19.9,24.6) | 17.6 (15.5,19.7) | 16.3 (14.3,18.4) | 15.0 (13.0,17.0) | 10.4 (6.7,13.5)  | Urban        |
|        | Gyeongsangbuk-do | Sangju-si       | 17.1 (16.2,18.0) | 24.9 (22.3,27.6) | 16.7 (14.7,18.6) | 15.9 (13.9,17.8) | 14.7 (12.8,16.5) | 13.3 (11.5,15.2) | 11.6 (7.5,13.9)  | Urban        |
|        | Gyeongsangbuk-do | Mungyeong-si    | 17.5 (16.6,18.5) | 23.7 (21.2,26.3) | 17.3 (15.3,19.4) | 17.9 (15.8,19.9) | 15.5 (13.6,17.5) | 13.4 (11.5,15.2) | 10.3 (5.3,12.7)  | Urban        |
|        | Gyeongsangbuk-do | Gyeongsan-si    | 17.1 (16.1,18.1) | 24.2 (21.5,27.0) | 18.2 (15.9,20.4) | 14.1 (12.1,16.1) | 15.8 (13.7,18.0) | 13.5 (11.5,15.4) | 10.7 (6.4,12.8)  | Urban        |
|        | Gyeongsangbuk-do | Gunwi-gun       | 17.1 (16.1,18.0) | 24.4 (21.6,27.3) | 18.1 (16.1,20.2) | 15.6 (13.7,17.5) | 14.8 (12.8,16.7) | 12.9 (11.1,14.7) | 11.5 (5.9,12.7)  | Rural        |
|        | Gyeongsangbuk-do | Uiseong-gun     | 16.4 (15.4,17.3) | 22.2 (19.6,24.9) | 17.1 (15.0,19.1) | 14.2 (12.4,16.1) | 15.3 (13.2,17.3) | 13.3 (11.4,15.3) | 8.9 (4.4,10.8)   | Rural        |
|        | Gyeongsangbuk-do | Cheongsong-gun  | 18.9 (17.9,19.9) | 28.0 (24.9,31.0) | 19.1 (17.0,21.2) | 16.5 (14.5,18.5) | 15.5 (13.6,17.5) | 15.6 (13.5,17.7) | 12.4 (9.6,16.4)  | Rural        |
|        | Gyeongsangbuk-do | Yeongyang-gun   | 20.6 (19.5,21.6) | 29.5 (26.4,32.5) | 22.9 (20.4,25.4) | 19.1 (16.8,21.3) | 17.1 (15.0,19.2) | 14.6 (12.7,16.6) | 14.9 (11.2,18.2) | Rural        |
|        | Gyeongsangbuk-do | Yeongdeok-gun   | 17.6 (16.6,18.6) | 27.9 (24.8,31.0) | 20.8 (18.4,23.3) | 14.8 (13.0,16.6) | 13.0 (11.2,14.8) | 11.4 (9.7,13.1)  | 16.5 (11.9,18.3) | Rural        |
|        | Gyeongsangbuk-do | Cheongdo-gun    | 18.2 (17.3,19.2) | 25.3 (22.5,28.0) | 17.6 (15.5,19.7) | 16.0 (14.1,17.9) | 16.9 (14.8,19.0) | 15.7 (13.7,17.8) | 9.6 (4.4,11.2)   | Rural        |
|        | Gyeongsangbuk-do | Goryeong-gun    | 17.9 (16.9,18.8) | 23.8 (21.1,26.4) | 17.4 (15.3,19.4) | 17.2 (15.1,19.4) | 15.3 (13.3,17.2) | 15.7 (13.6,17.8) | 8.1 (4.1,10.9)   | Rural        |
|        | Gyeongsangbuk-do | Seongju-gun     | 12.1 (11.3,12.9) | 19.8 (17.4,22.2) | 13.0 (11.2,14.8) | 9.9 (8.3,11.4)   | 9.0 (7.5,10.4)   | 8.9 (7.4,10.4)   | 10.9 (7.5,13.3)  | Rural        |
|        | Gyeongsangbuk-do | Chilgok-gun     | 17.1 (16.1,18.1) | 24.3 (21.5,27.2) | 17.4 (15.0,19.8) | 17.2 (14.9,19.5) | 13.1 (11.1,15.1) | 13.9 (11.9,16.0) | 10.4 (6.5,13.1)  | Rural        |
|        | Gyeongsangbuk-do | Yecheon-gun     | 18.4 (17.3,19.4) | 30.1 (26.9,33.3) | 18.6 (16.4,20.7) | 17.7 (15.4,19.9) | 13.8 (12.0,15.6) | 11.8 (10.1,13.5) | 18.3 (11.4,18.2) | Rural        |
|        | Gyeongsangbuk-do | Bonghwa-gun     | 19.7 (18.7,20.8) | 28.0 (25.0,31.0) | 19.8 (17.5,22.1) | 19.6 (17.3,21.9) | 17.0 (15.0,19.1) | 14.4 (12.4,16.4) | 13.6 (9.4,16.4)  | Rural        |
|        | Gyeongsangbuk-do | Uljin-gun       | 18.3 (17.3,19.3) | 27.2 (24.4,30.0) | 19.6 (17.5,21.8) | 16.4 (14.4,18.3) | 15.5 (13.5,17.5) | 13.3 (11.5,15.0) | 13.9 (10.3,17.1) | Rural        |
|        | Gyeongsangbuk-do | Ulleung-gun     | 15.7 (14.8,16.7) | 22.6 (19.9,25.2) | 17.7 (15.5,19.9) | 14.3 (12.3,16.4) | 12.3 (10.4,14.1) | 11.7 (9.8,13.6)  | 10.9 (8.8,15.6)  | Rural        |
|        | Gyeongsangnam-do | Changwon-si     | 17.5 (16.3,18.7) | 23.3 (20.1,26.4) | 18.6 (15.9,21.4) | 16.9 (14.4,19.4) | 15.9 (13.4,18.4) | 13.2 (10.9,15.5) | 10.1 (6.7,13.3)  | Metropolitan |
|        | Gyeongsangnam-do | Masan-si        | 14.6 (13.7,15.5) | 22.1 (19.6,24.7) | 14.0 (12.0,15.9) | 13.4 (11.4,15.3) | 13.7 (11.7,15.7) | 10.1 (8.4,11.8)  | 12.0 (7.4,13.6)  | Metropolitan |
|        | Gyeongsangnam-do | Jinju-si        | 15.7 (14.7,16.6) | 24.1 (21.4,26.7) | 15.1 (13.0,17.1) | 15.1 (13.0,17.1) | 13.0 (11.1,14.9) | 11.4 (9.6,13.2)  | 12.7 (8.8,15.2)  | Urban        |
|        | Gyeongsangnam-do | Jinhae-si       | 15.8 (14.8,16.8) | 22.0 (19.3,24.8) | 16.8 (14.5,19.0) | 14.9 (12.7,17.1) | 13.4 (11.4,15.5) | 12.1 (10.2,14.1) | 9.9 (6.4,12.8)   | Metropolitan |
|        | Gyeongsangnam-do | Tongyeong-si    | 19.5 (18.5,20.6) | 28.1 (25.2,31.0) | 20.8 (18.4,23.2) | 17.7 (15.5,20.0) | 15.3 (13.3,17.4) | 16.0 (13.9,18.2) | 12.1 (8.5,15.3)  | Urban        |
|        | Gyeongsangnam-do | Sacheon-si      | 16.8 (15.9,17.8) | 25.7 (22.9,28.4) | 18.6 (16.4,20.9) | 13.7 (11.8,15.5) | 13.6 (11.8,15.5) | 12.9 (11.1,14.8) | 12.8 (8.5,15.1)  | Urban        |
|        | Gyeongsangnam-do | Gimhae-si       | 16.6 (15.5,17.7) | 23.1 (20.1,26.1) | 16.6 (14.3,19.0) | 15.2 (12.9,17.5) | 13.8 (11.6,16.0) | 15.0 (12.7,17.2) | 8.1 (4.3,10.9)   | Urban        |
|        | Gyeongsangnam-do | Miryang-si      | 17.4 (16.5,18.4) | 26.6 (23.9,29.2) | 19.0 (16.8,21.2) | 16.8 (14.8,18.8) | 12.9 (11.2,14.6) | 12.1 (10.4,13.8) | 14.5 (12.7,19.1) | Urban        |
|        | Gyeongsangnam-do | Geoje-si        | 16.4 (15.3,17.5) | 21.0 (18.3,23.8) | 17.3 (14.8,19.8) | 15.8 (13.4,18.2) | 13.9 (11.7,16.1) | 14.1 (11.9,16.4) | 6.9 (3.3,9.7)    | Urban        |
|        | Gyeongsangnam-do | Yangsang-si     | 13.6 (12.7,14.6) | 20.7 (18.1,23.2) | 14.1 (11.9,16.3) | 11.9 (10.0,13.8) | 11.0 (9.1,12.8)  | 10.9 (9.0,12.7)  | 9.8 (5.1,11.3)   | Urban        |
|        | Gyeongsangnam-do | Uiryeong-gun    | 17.5 (16.5,18.5) | 23.1 (20.4,25.8) | 19.4 (17.1,21.7) | 15.0 (13.1,16.8) | 15.9 (13.8,18.0) | 14.6 (12.5,16.6) | 8.5 (7.6,14.8)   | Rural        |
|        | Gyeongsangnam-do | Haman-gun       | 15.8 (14.9,16.7) | 22.2 (19.7,24.6) | 15.9 (13.9,17.9) | 15.0 (13.2,16.9) | 12.9 (11.1,14.6) | 13.1 (11.3,14.9) | 9.1 (6.3,12.9)   | Rural        |
|        | Gyeongsangnam-do | Changnyeong-gun | 18.4 (17.5,19.4) | 24.8 (22.1,27.5) | 19.7 (17.5,21.9) | 16.7 (14.7,18.7) | 15.4 (13.5,17.3) | 15.8 (13.7,17.8) | 9.0 (5.2,12.0)   | Rural        |
|        | Gyeongsangnam-do | Goseong-gun     | 15.9 (15.0,16.8) | 22.8 (20.2,25.4) | 17.0 (15.0,19.1) | 15.1 (13.2,17.0) | 13.7 (11.8,15.5) | 11.1 (9.5,12.8)  | 11.7 (8.0,14.2)  | Rural        |
|        | Gyeongsangnam-do | Namhae-gun      | 21.6 (20.5,22.7) | 31.0 (27.8,34.2) | 24.2 (21.6,26.8) | 19.9 (17.6,22.2) | 18.1 (15.9,20.3) | 15.3 (13.2,17.4) | 15.7 (11.7,18.9) | Rural        |

(continued to the next page)

## Appendix 4. Continued

| Gender | Provinces        | Districts       | Overall          | Q1 (lowest)      | Q2               | Q3               | Q4               | Q5 (highest)     | Q1-Q5            | Urbanity     |
|--------|------------------|-----------------|------------------|------------------|------------------|------------------|------------------|------------------|------------------|--------------|
|        | Gyeongsangnam-do | Hadong-gun      | 21.2 (20.1,22.3) | 28.8 (25.8,31.8) | 22.7 (20.3,25.2) | 20.4 (18.1,22.7) | 17.3 (15.2,19.3) | 17.2 (15.0,19.4) | 11.6 (5.5,12.7)  | Rural        |
|        | Gyeongsangnam-do | Sancheong-gun   | 19.4 (18.3,20.4) | 27.9 (24.9,30.9) | 21.2 (18.9,23.6) | 17.1 (15.1,19.0) | 16.7 (14.6,18.7) | 14.2 (12.3,16.2) | 13.7 (10.2,17.0) | Rural        |
|        | Gyeongsangnam-do | Hamyang-gun     | 19.2 (18.2,20.2) | 23.5 (20.9,26.2) | 22.3 (19.8,24.8) | 18.0 (15.8,20.1) | 17.1 (15.0,19.2) | 15.3 (13.3,17.3) | 8.2 (5.5,13.7)   | Rural        |
|        | Gyeongsangnam-do | Geochang-gun    | 17.0 (16.0,17.9) | 25.5 (22.8,28.1) | 17.3 (15.3,19.4) | 16.3 (14.3,18.4) | 13.6 (11.8,15.4) | 12.3 (10.5,14.0) | 13.2 (8.4,15.0)  | Rural        |
|        | Gyeongsangnam-do | Hapcheon-gun    | 19.2 (18.1,20.2) | 26.5 (23.6,29.5) | 21.8 (19.3,24.3) | 18.6 (16.5,20.7) | 14.8 (13.0,16.7) | 14.7 (12.7,16.7) | 11.8 (5.9,13.3)  | Rural        |
|        | Jeju-do          | Jeju-si         | 15.7 (15.1,16.2) | 24.4 (22.7,26.0) | 17.6 (16.2,19.1) | 13.7 (12.5,15.0) | 11.7 (10.6,12.8) | 11.6 (10.6,12.7) | 12.8 (10.9,14.7) | Urban        |
|        | Jeju-do          | Seogwipo-si     | 16.0 (15.5,16.6) | 23.2 (21.6,24.8) | 16.7 (15.4,18.0) | 14.5 (13.3,15.7) | 13.2 (12.1,14.3) | 13.0 (11.9,14.2) | 10.2 (7.0,11.0)  | Urban        |
| Men    | Seoul            | Jongno-gu       | 10.0 (8.9,11.2)  | 18.1 (14.6,21.5) | 10.7 (8.1,13.4)  | 9.6 (7.0,12.1)   | 6.4 (4.4,8.5)    | 5.7 (3.8,7.6)    | 12.4 (8.5,16.5)  | Metropolitan |
|        | Seoul            | Jung-gu         | 11.1 (9.9,12.3)  | 20.1 (16.3,23.8) | 11.2 (8.5,13.9)  | 9.7 (7.2,12.2)   | 8.6 (6.3,10.9)   | 6.3 (4.3,8.3)    | 13.8 (8.8,17.4)  | Metropolitan |
|        | Seoul            | Yongsan-gu      | 9.5 (8.3,10.7)   | 16.8 (13.3,20.2) | 6.8 (4.6,8.9)    | 9.1 (6.6,11.6)   | 7.9 (5.5,10.3)   | 6.7 (4.6,8.9)    | 10.1 (8.1,16.7)  | Metropolitan |
|        | Seoul            | Seongdong-gu    | 10.7 (9.4,12.0)  | 12.7 (9.6,15.8)  | 10.6 (7.9,13.2)  | 11.6 (8.5,14.7)  | 10.3 (7.7,13.0)  | 8.2 (5.7,10.6)   | 4.5 (-0.1,7.3)   | Metropolitan |
|        | Seoul            | Gwangjin-gu     | 9.9 (8.6,11.1)   | 13.0 (9.7,16.2)  | 12.1 (9.1,15.1)  | 9.3 (6.5,12.0)   | 8.8 (6.2,11.4)   | 6.3 (4.0,8.5)    | 6.7 (5.9,12.9)   | Metropolitan |
|        | Seoul            | Dongdaemun-gu   | 11.0 (9.8,12.3)  | 17.4 (13.8,20.9) | 11.9 (9.1,14.7)  | 9.0 (6.5,11.5)   | 8.1 (5.7,10.6)   | 8.7 (6.1,11.3)   | 8.7 (3.7,11.9)   | Metropolitan |
|        | Seoul            | Jungnang-gu     | 11.1 (9.9,12.4)  | 18.8 (15.0,22.5) | 13.2 (10.0,16.3) | 8.6 (6.1,11.1)   | 9.9 (7.2,12.7)   | 5.5 (3.3,7.6)    | 13.3 (10.3,18.7) | Metropolitan |
|        | Seoul            | Seongbuk-gu     | 10.4 (9.2,11.6)  | 19.0 (15.3,22.7) | 9.8 (7.2,12.4)   | 7.3 (5.1,9.5)    | 9.0 (6.4,11.6)   | 7.5 (5.2,9.8)    | 11.5 (8.1,16.7)  | Metropolitan |
|        | Seoul            | Gangbuk-gu      | 12.0 (10.8,13.3) | 17.7 (14.2,21.3) | 13.8 (10.7,16.8) | 12.4 (9.5,15.3)  | 8.4 (6.0,10.7)   | 7.7 (5.4,10.0)   | 10.0 (6.2,15.0)  | Metropolitan |
|        | Seoul            | Dobong-gu       | 11.5 (10.2,12.8) | 18.4 (14.8,22.1) | 11.2 (8.4,14.1)  | 11.7 (8.8,14.5)  | 9.0 (6.5,11.4)   | 7.7 (5.3,10.0)   | 10.7 (6.7,15.7)  | Metropolitan |
|        | Seoul            | Nowon-gu        | 11.3 (9.9,12.6)  | 21.2 (17.1,25.4) | 11.5 (8.6,14.3)  | 10.6 (7.6,13.6)  | 7.9 (5.4,10.5)   | 5.4 (3.4,7.5)    | 15.8 (9.6,18.0)  | Metropolitan |
|        | Seoul            | Eunpyeong-gu    | 12.0 (10.7,13.3) | 18.8 (15.1,22.6) | 13.4 (10.3,16.4) | 11.4 (8.6,14.1)  | 10.3 (7.6,13.0)  | 6.0 (3.9,8.1)    | 12.8 (7.8,16.2)  | Metropolitan |
|        | Seoul            | Seodaemun-gu    | 11.2 (9.9,12.4)  | 16.6 (13.2,20.1) | 12.9 (9.9,15.9)  | 10.6 (7.8,13.4)  | 9.6 (7.1,12.1)   | 6.1 (4.0,8.2)    | 10.5 (4.9,13.1)  | Metropolitan |
|        | Seoul            | Mapo-gu         | 9.3 (8.1,10.5)   | 13.7 (10.4,17.0) | 11.8 (8.8,14.9)  | 10.2 (7.5,13.0)  | 6.3 (4.1,8.4)    | 4.9 (3.0,6.9)    | 8.8 (2.6,10.8)   | Metropolitan |
|        | Seoul            | Yangcheon-gu    | 11.0 (9.6,12.3)  | 20.6 (16.4,24.8) | 12.3 (9.3,15.3)  | 8.0 (5.3,10.6)   | 7.2 (4.7,9.7)    | 7.2 (4.7,9.7)    | 13.4 (6.6,15.4)  | Metropolitan |
|        | Seoul            | Gangseo-gu      | 12.4 (11.0,13.8) | 20.4 (16.3,24.5) | 14.0 (10.8,17.2) | 10.5 (7.6,13.4)  | 9.9 (7.1,12.7)   | 7.5 (5.1,10.0)   | 12.9 (5.1,13.5)  | Metropolitan |
|        | Seoul            | Guro-gu         | 11.9 (10.5,13.2) | 21.6 (17.6,25.7) | 9.9 (7.2,12.6)   | 11.0 (8.1,13.9)  | 9.3 (6.7,11.8)   | 7.7 (5.2,10.2)   | 13.9 (9.1,17.7)  | Metropolitan |
|        | Seoul            | Geumcheon-gu    | 11.6 (10.3,12.9) | 18.0 (14.4,21.6) | 11.4 (8.6,14.2)  | 11.5 (8.7,14.3)  | 7.7 (5.4,10.0)   | 9.7 (7.1,12.4)   | 8.3 (2.7,11.1)   | Metropolitan |
|        | Seoul            | Yeongdeungpo-gu | 11.9 (10.6,13.2) | 19.3 (15.6,23.1) | 12.0 (9.0,14.9)  | 11.0 (8.2,13.8)  | 8.9 (6.4,11.5)   | 8.3 (5.8,10.8)   | 11.0 (5.9,14.3)  | Metropolitan |
|        | Seoul            | Dongjak-gu      | 11.6 (10.3,12.9) | 17.4 (13.7,21.0) | 11.1 (8.2,14.0)  | 10.1 (7.5,12.7)  | 10.4 (7.7,13.1)  | 9.4 (6.8,12.1)   | 8.0 (2.0,10.4)   | Metropolitan |
|        | Seoul            | Gwanak-gu       | 11.7 (10.3,13.0) | 16.3 (12.7,19.9) | 13.4 (10.1,16.7) | 11.1 (8.3,13.9)  | 8.4 (5.8,11.0)   | 9.8 (6.9,12.6)   | 6.5 (5.0,13.2)   | Metropolitan |
|        | Seoul            | Seocho-gu       | 7.5 (6.4,8.6)    | 10.9 (8.0,13.9)  | 9.2 (6.5,11.8)   | 7.0 (4.7,9.3)    | 5.1 (3.2,7.1)    | 5.3 (3.1,7.5)    | 5.6 (4.2,11.2)   | Metropolitan |
|        | Seoul            | Gangnam-gu      | 7.8 (6.6,8.9)    | 11.6 (8.3,15.0)  | 7.4 (4.8,9.9)    | 7.7 (5.2,10.2)   | 6.5 (4.1,8.9)    | 5.9 (3.5,8.3)    | 5.7 (3.0,10.6)   | Metropolitan |
|        | Seoul            | Songpa-gu       | 7.8 (6.6,8.9)    | 12.9 (9.6,16.3)  | 8.0 (5.3,10.7)   | 6.8 (4.3,9.2)    | 7.2 (4.8,9.6)    | 4.0 (2.2,5.7)    | 8.9 (5.9,13.1)   | Metropolitan |
|        | Seoul            | Gangdong-gu     | 11.5 (10.1,12.9) | 17.1 (13.4,20.8) | 13.5 (10.4,16.7) | 9.8 (6.9,12.6)   | 8.8 (6.1,11.5)   | 8.2 (5.4,11.0)   | 8.9 (5.9,14.3)   | Metropolitan |
|        | Busan            | Jung-gu         | 12.8 (11.5,14.1) | 21.5 (17.7,25.4) | 13.3 (10.5,16.2) | 13.2 (10.2,16.1) | 8.8 (6.4,11.1)   | 7.7 (5.5,9.9)    | 13.8 (10.0,19.0) | Metropolitan |
|        | Busan            | Seo-gu          | 13.5 (12.2,14.8) | 23.0 (19.1,26.8) | 14.5 (11.5,17.4) | 10.2 (7.7,12.7)  | 9.8 (7.4,12.3)   | 10.0 (7.5,12.5)  | 13.0 (7.6,16.8)  | Metropolitan |
|        | Busan            | Dong-gu         | 16.0 (14.6,17.5) | 26.7 (22.4,30.9) | 15.3 (12.1,18.5) | 13.2 (10.3,16.1) | 13.1 (10.2,16.0) | 12.2 (9.4,15.1)  | 14.5 (8.8,18.6)  | Metropolitan |
|        | Busan            | Yeongdo-gu      | 16.1 (14.7,17.6) | 27.8 (23.5,32.1) | 17.3 (14.1,20.5) | 13.6 (10.6,16.5) | 11.6 (9.0,14.2)  | 11.1 (8.5,13.7)  | 16.7 (10.4,20.2) | Metropolitan |
|        | Busan            | Busanjin-gu     | 11.9 (10.6,13.1) | 20.0 (16.3,23.7) | 14.2 (11.2,17.3) | 10.4 (7.6,13.2)  | 8.6 (6.1,11.0)   | 5.8 (3.8,7.9)    | 14.2 (9.6,17.8)  | Metropolitan |
|        | Busan            | Dongnae-gu      | 11.3 (10.0,12.5) | 15.8 (12.6,19.0) | 11.6 (8.6,14.5)  | 9.7 (7.2,12.3)   | 9.3 (6.8,11.8)   | 9.7 (7.0,12.3)   | 6.1 (4.7,12.7)   | Metropolitan |
|        | Busan            | Nam-gu          | 11.2 (9.9,12.4)  | 17.0 (13.6,20.4) | 11.8 (9.0,14.6)  | 10.2 (7.5,12.8)  | 9.0 (6.6,11.5)   | 7.9 (5.5,10.3)   | 9.1 (6.7,14.7)   | Metropolitan |
|        | Busan            | Buk-gu          | 12.1 (10.7,13.5) | 20.8 (16.9,24.8) | 10.6 (7.5,13.6)  | 10.9 (8.0,13.7)  | 8.2 (5.7,10.7)   | 10.1 (7.1,13.0)  | 10.7 (9.0,17.8)  | Metropolitan |
|        | Busan            | Haendae-gu      | 11.8 (10.5,13.1) | 24.7 (20.4,29.0) | 10.9 (8.1,13.7)  | 10.1 (7.4,12.8)  | 8.6 (6.1,11.2)   | 5.3 (3.2,7.3)    | 19.4 (13.6,22.2) | Metropolitan |
|        | Busan            | Saha-gu         | 12.7 (11.4,14.1) | 21.5 (17.5,25.5) | 12.7 (9.6,15.8)  | 9.7 (7.1,12.4)   | 9.8 (7.1,12.5)   | 10.1 (7.3,13.0)  | 11.4 (6.7,15.7)  | Metropolitan |
|        | Busan            | Geumjeong-gu    | 10.9 (9.6,12.1)  | 20.0 (16.2,23.9) | 11.5 (8.6,14.3)  | 8.4 (6.1,10.7)   | 7.4 (5.2,9.7)    | 7.9 (5.5,10.3)   | 12.1 (10.2,18.4) | Metropolitan |
|        | Busan            | Gangseo-gu      | 14.0 (12.7,15.3) | 21.1 (17.4,24.8) | 13.4 (10.5,16.2) | 13.7 (10.7,16.6) | 11.4 (8.7,14.2)  | 10.5 (7.9,13.2)  | 10.6 (4.5,13.5)  | Metropolitan |
|        | Busan            | Yeonje-gu       | 12.5 (11.1,13.8) | 21.7 (17.8,25.6) | 11.1 (8.4,13.8)  | 10.3 (7.6,13.0)  | 8.5 (6.2,10.9)   | 11.1 (8.2,14.0)  | 10.6 (5.2,14.2)  | Metropolitan |
|        | Busan            | Suyeong-gu      | 10.9 (9.8,12.1)  | 17.5 (14.1,20.8) | 11.1 (8.4,13.9)  | 8.2 (6.0,10.5)   | 10.2 (7.6,12.8)  | 7.8 (5.4,10.1)   | 9.7 (5.9,14.3)   | Metropolitan |
|        | Busan            | Sasang-gu       | 13.5 (12.0,14.9) | 18.8 (15.1,22.6) | 12.2 (9.2,15.3)  | 12.5 (9.4,15.6)  | 12.2 (9.2,15.2)  | 11.9 (8.8,15.0)  | 6.9 (1.0,9.8)    | Metropolitan |
|        | Busan            | Gijang-gun      | 15.0 (13.5,16.4) | 21.3 (17.4,25.1) | 15.7 (12.3,19.1) | 15.2 (12.0,18.3) | 13.9 (10.8,17.0) | 9.2 (6.6,11.7)   | 12.1 (5.2,14.2)  | Rural        |
|        | Daegu            | Jung-gu         | 15.8 (14.4,17.3) | 24.0 (19.8,28.1) | 17.7 (14.5,21.0) | 14.8 (11.7,18.0) | 12.0 (9.2,14.7)  | 10.8 (8.0,13.5)  | 13.2 (7.1,16.3)  | Metropolitan |
|        | Daegu            | Dong-gu         | 15.7 (14.3,17.2) | 22.8 (18.7,26.9) | 18.2 (14.8,21.6) | 13.9 (10.9,16.8) | 13.5 (10.5,16.6) | 10.6 (7.9,13.3)  | 12.2 (7.9,16.9)  | Metropolitan |
|        | Daegu            | Seo-gu          | 15.1 (13.7,16.6) | 21.0 (17.1,24.8) | 16.6 (13.0,20.1) | 13.6 (10.5,16.6) | 14.0 (10.8,17.2) | 10.4 (7.6,13.1)  | 10.6 (7.0,15.6)  | Metropolitan |
|        | Daegu            | Nam-gu          | 13.1 (11.7,14.4) | 21.1 (17.2,25.0) | 13.7 (10.7,16.8) | 11.6 (8.8,14.4)  | 10.4 (7.8,12.9)  | 9.0 (6.5,11.5)   | 12.1 (7.7,16.5)  | Metropolitan |
|        | Daegu            | Buk-gu          | 12.5 (11.2,13.9) | 20.8 (16.7,24.9) | 13.6 (10.3,16.8) | 11.8 (8.9,14.7)  | 8.7 (6.2,11.3)   | 8.4 (5.8,10.9)   | 12.4 (10.1,18.5) | Metropolitan |
|        | Daegu            | Suseong-gu      | 11.7 (10.4,13.0) | 19.1 (15.4,22.8) | 12.1 (9.2,15.1)  | 11.0 (8.3,13.7)  | 9.0 (6.5,11.6)   | 7.3 (5.0,9.7)    | 11.8 (6.1,14.3)  | Metropolitan |
|        | Daegu            | Dalseo-gu       | 13.1 (11.7,14.5) | 21.7 (17.6,25.7) | 16.0 (12.3,19.7) | 10.1 (7.4,12.9)  | 9.4 (6.7,12.2)   | 8.4 (5.8,10.9)   | 13.3 (7.7,16.5)  | Metropolitan |
|        | Daegu            | Dalseong-gun    | 14.2 (12.8,15.6) | 18.1 (14.4,21.7) | 16.1 (12.6,19.6) | 14.7 (11.6,17.8) | 12.2 (9.1,15.2)  | 9.9 (7.2,12.7)   | 8.2 (7.9,16.3)   | Rural        |
|        | Incheon          | Jung-gu         | 12.2 (10.9,13.5) | 18.3 (14.7,22.0) | 13.5 (10.6,16.4) | 12.0 (9.1,14.9)  | 9.6 (7.1,12.2)   | 7.7 (5.4,10.1)   | 10.6 (5.7,14.1)  | Metropolitan |
|        | Incheon          | Dong-gu         | 12.1 (10.9,13.4) | 18.6 (15.0,22.2) | 12.9 (9.9,16.0)  | 13.2 (10.3,16.0) | 8.2 (5.9,10.5)   | 8.2 (5.8,10.5)   | 10.4 (5.9,14.1)  | Metropolitan |
|        | Incheon          | Nam-gu          | 10.3 (9.1,11.5)  | 17.6 (13.9,21.2) | 8.7 (6.1,11.2)   | 8.7 (6.3,11.1)   | 8.4 (5.9,10.8)   | 8.7 (6.2,11.2)   | 8.9 (2.4,10.6)   | Metropolitan |
|        | Incheon          | Yeonsu-gu       | 11.9 (10.4,13.4) | 15.8 (12.0,19.7) | 12.4 (8.9,15.9)  | 10.5 (7.4,13.5)  | 10.0 (6.9,13.1)  | 11.0 (7.6,14.3)  | 4.8 (0.4,9.2)    | Metropolitan |

(continued to the next page)



## Appendix 4. Continued

| Gender | Provinces   | Districts      | Overall          | Q1 (lowest)      | Q2               | Q3               | Q4              | Q5 (highest)    | Q1-Q5            | Urbanity     |
|--------|-------------|----------------|------------------|------------------|------------------|------------------|-----------------|-----------------|------------------|--------------|
|        | Incheon     | Namdong-gu     | 12.2 (10.7,13.7) | 18.9 (14.8,23.1) | 12.3 (8.8,15.7)  | 11.7 (8.4,14.9)  | 7.5 (4.9,10.1)  | 10.7 (7.6,13.8) | 8.2 (7.8,16.8)   | Metropolitan |
|        | Incheon     | Bupyeong-gu    | 14.3 (12.8,15.9) | 24.2 (19.7,28.8) | 13.8 (10.4,17.2) | 13.7 (10.5,17.0) | 10.7 (7.7,13.6) | 9.8 (6.8,12.7)  | 14.4 (10.1,19.5) | Metropolitan |
|        | Incheon     | Gyeong-gu      | 14.1 (12.4,15.8) | 21.2 (16.5,25.9) | 14.6 (10.7,18.6) | 13.4 (9.9,16.9)  | 11.1 (7.7,14.5) | 10.8 (7.4,14.1) | 10.4 (5.2,14.8)  | Metropolitan |
|        | Incheon     | Seo-gu         | 12.8 (11.3,14.4) | 18.8 (14.5,23.0) | 11.4 (8.2,14.5)  | 12.1 (8.8,15.4)  | 11.6 (8.3,14.9) | 10.5 (7.4,13.6) | 8.3 (5.7,14.3)   | Metropolitan |
|        | Incheon     | Ganghwa-gun    | 13.5 (12.2,14.8) | 20.5 (16.8,24.2) | 15.9 (12.8,18.9) | 10.9 (8.5,13.3)  | 9.4 (7.1,11.7)  | 10.9 (8.3,13.4) | 9.6 (3.0,12.2)   | Rural        |
|        | Incheon     | Ongjin-gun     | 10.8 (9.7,12.0)  | 15.5 (12.3,18.8) | 9.8 (7.4,12.2)   | 10.2 (7.6,12.8)  | 9.5 (7.1,12.0)  | 9.0 (6.6,11.4)  | 6.5 (3.6,11.8)   | Rural        |
|        | Gwangju     | Dong-gu        | 13.0 (11.7,14.3) | 21.1 (17.3,24.9) | 15.2 (12.1,18.4) | 9.9 (7.5,12.3)   | 10.4 (7.8,13.0) | 8.8 (6.3,11.2)  | 12.3 (8.5,17.3)  | Metropolitan |
|        | Gwangju     | Seo-gu         | 10.8 (9.4,12.1)  | 15.3 (11.9,18.8) | 12.6 (9.2,15.9)  | 11.1 (8.1,14.0)  | 7.6 (5.2,10.0)  | 7.8 (5.2,10.4)  | 7.5 (5.6,13.0)   | Metropolitan |
|        | Gwangju     | Nam-gu         | 12.9 (11.6,14.2) | 21.3 (17.4,25.1) | 15.1 (12.0,18.2) | 9.7 (7.1,12.3)   | 9.0 (6.6,11.4)  | 9.8 (7.3,12.4)  | 11.5 (7.0,15.8)  | Metropolitan |
|        | Gwangju     | Buk-gu         | 13.5 (12.1,14.9) | 19.3 (15.4,23.1) | 13.7 (10.6,16.9) | 11.6 (8.6,14.6)  | 12.0 (8.9,15.0) | 10.9 (8.0,13.8) | 8.4 (5.0,13.6)   | Metropolitan |
|        | Gwangju     | Gwangsan-gu    | 12.8 (11.2,14.3) | 21.1 (16.6,25.5) | 14.9 (11.2,18.6) | 11.0 (7.8,14.2)  | 8.2 (5.4,11.0)  | 8.8 (5.8,11.8)  | 12.3 (9.1,17.7)  | Metropolitan |
|        | Daejeon     | Dong-gu        | 12.7 (11.3,14.0) | 25.1 (20.9,29.3) | 12.2 (9.3,15.0)  | 9.2 (6.7,11.7)   | 8.1 (5.6,10.5)  | 8.9 (6.4,11.4)  | 16.2 (9.2,18.2)  | Metropolitan |
|        | Daejeon     | Jung-gu        | 11.3 (10.0,12.5) | 18.6 (14.9,22.3) | 12.0 (9.2,14.9)  | 10.1 (7.4,12.9)  | 9.5 (7.0,11.9)  | 6.5 (4.4,8.7)   | 12.1 (6.5,15.1)  | Metropolitan |
|        | Daejeon     | Seo-gu         | 11.4 (10.0,12.8) | 18.7 (14.5,22.8) | 13.4 (10.3,16.5) | 10.8 (7.7,13.9)  | 8.5 (5.9,11.2)  | 6.5 (4.2,8.8)   | 12.2 (8.9,16.9)  | Metropolitan |
|        | Daejeon     | Yuseong-gu     | 10.4 (9.0,11.8)  | 15.5 (11.9,19.1) | 12.4 (8.9,15.8)  | 8.9 (6.1,11.7)   | 7.2 (4.5,9.8)   | 7.1 (4.3,9.8)   | 8.4 (4.0,12.0)   | Metropolitan |
|        | Daejeon     | Daedeok-gu     | 11.0 (9.7,12.4)  | 16.7 (13.0,20.5) | 13.0 (9.9,16.1)  | 8.8 (6.1,11.6)   | 9.4 (6.5,12.2)  | 7.2 (4.6,9.8)   | 9.5 (5.9,14.1)   | Metropolitan |
|        | Ulsan       | Jung-gu        | 13.9 (12.4,15.4) | 20.8 (16.8,24.7) | 13.0 (9.7,16.4)  | 11.7 (8.5,14.9)  | 11.9 (8.9,14.8) | 11.9 (8.8,15.0) | 8.9 (7.1,16.1)   | Metropolitan |
|        | Ulsan       | Nam-gu         | 10.4 (9.0,11.8)  | 13.9 (10.1,17.8) | 10.8 (7.6,13.9)  | 11.1 (7.9,14.2)  | 8.9 (5.9,11.9)  | 7.9 (5.3,10.4)  | 6.0 (2.5,9.9)    | Metropolitan |
|        | Ulsan       | Dong-gu        | 10.0 (8.6,11.4)  | 17.3 (13.1,21.4) | 10.5 (7.2,13.8)  | 8.8 (6.0,11.5)   | 6.6 (4.1,9.0)   | 7.6 (4.7,10.5)  | 9.7 (6.6,14.0)   | Metropolitan |
|        | Ulsan       | Buk-gu         | 10.3 (8.8,11.8)  | 14.4 (10.5,18.4) | 11.9 (8.3,15.4)  | 9.3 (6.0,12.5)   | 7.5 (4.6,10.4)  | 8.8 (5.5,12.0)  | 5.6 (2.6,10.2)   | Metropolitan |
|        | Ulsan       | Ulju-gun       | 14.9 (13.4,16.3) | 23.9 (19.6,28.2) | 16.1 (12.7,19.6) | 12.6 (9.6,15.6)  | 10.0 (7.3,12.8) | 12.2 (9.2,15.2) | 11.7 (5.5,14.9)  | Rural        |
|        | Sejong      | Sejong         | 15.1 (13.7,16.5) | 24.3 (20.2,28.4) | 14.8 (11.8,17.8) | 15.0 (11.9,18.1) | 11.6 (8.9,14.2) | 9.9 (7.3,12.5)  | 14.4 (9.3,18.5)  | Metropolitan |
|        | Gyeonggi-do | Jangan-gu      | 10.8 (9.5,12.2)  | 18.2 (14.2,22.2) | 12.5 (9.3,15.7)  | 10.0 (7.3,12.6)  | 7.2 (4.8,9.7)   | 6.3 (3.9,8.6)   | 11.9 (8.1,16.5)  | Metropolitan |
|        | Gyeonggi-do | Gwonseon-gu    | 10.7 (9.3,12.1)  | 17.4 (13.4,21.5) | 9.9 (6.9,13.0)   | 10.7 (7.7,13.7)  | 8.6 (5.9,11.3)  | 6.9 (4.3,9.5)   | 10.5 (7.0,14.8)  | Metropolitan |
|        | Gyeonggi-do | Paldal-gu      | 11.0 (9.7,12.4)  | 16.2 (12.6,19.9) | 11.3 (8.4,14.2)  | 8.5 (5.9,11.2)   | 9.6 (6.9,12.3)  | 9.6 (6.8,12.3)  | 6.6 (1.2,11.0)   | Metropolitan |
|        | Gyeonggi-do | Yeongtong-gu   | 9.6 (8.1,11.2)   | 11.9 (8.1,15.7)  | 9.9 (6.3,13.5)   | 8.2 (5.2,11.1)   | 8.9 (5.6,12.1)  | 9.0 (5.3,12.6)  | 2.9 (-1.1,6.5)   | Metropolitan |
|        | Gyeonggi-do | Sujeong-gu     | 13.5 (12.0,14.9) | 20.4 (16.4,24.3) | 14.3 (11.0,17.5) | 12.7 (9.6,15.9)  | 10.0 (7.3,12.6) | 10.1 (7.3,12.9) | 10.3 (5.9,14.5)  | Metropolitan |
|        | Gyeonggi-do | Jungwon-gu     | 13.5 (12.0,14.9) | 22.9 (18.7,27.0) | 13.2 (10.1,16.4) | 11.7 (8.7,14.8)  | 10.1 (7.3,12.9) | 9.7 (7.0,12.4)  | 13.2 (7.1,16.1)  | Metropolitan |
|        | Gyeonggi-do | Bundang-gu     | 6.2 (5.2,7.2)    | 9.1 (6.4,11.8)   | 5.1 (3.1,7.1)    | 6.4 (4.2,8.6)    | 5.3 (3.3,7.4)   | 5.2 (3.1,7.3)   | 3.9 (-0.3,5.7)   | Metropolitan |
|        | Gyeonggi-do | Uijeongbu-si   | 12.6 (11.2,14.0) | 20.0 (16.0,24.0) | 13.0 (9.8,16.2)  | 10.9 (8.0,13.7)  | 9.7 (7.1,12.4)  | 9.7 (7.0,12.5)  | 10.3 (4.6,13.6)  | Urban        |
|        | Gyeonggi-do | Manan-gu       | 10.7 (9.4,11.9)  | 17.6 (14.0,21.3) | 13.2 (10.1,16.3) | 9.1 (6.5,11.7)   | 7.2 (4.8,9.5)   | 6.3 (4.1,8.6)   | 11.3 (7.3,15.3)  | Metropolitan |
|        | Gyeonggi-do | Dongan-gu      | 9.2 (7.9,10.5)   | 13.7 (10.0,17.4) | 8.3 (5.4,11.1)   | 8.6 (6.0,11.3)   | 6.2 (3.9,8.5)   | 9.4 (6.5,12.3)  | 4.3 (0.1,7.7)    | Metropolitan |
|        | Gyeonggi-do | Wonmi-gu       | 11.2 (9.8,12.7)  | 16.2 (12.3,20.0) | 11.5 (8.3,14.7)  | 8.5 (5.7,11.4)   | 9.8 (6.9,12.7)  | 10.3 (7.1,13.4) | 5.9 (2.2,10.8)   | Metropolitan |
|        | Gyeonggi-do | Sosa-gu        | 11.7 (10.3,13.1) | 17.2 (13.3,21.1) | 12.7 (9.6,15.8)  | 9.6 (6.9,12.4)   | 10.2 (7.4,13.1) | 9.2 (6.4,12.1)  | 8.0 (5.8,14.4)   | Metropolitan |
|        | Gyeonggi-do | Ojeong-gu      | 12.5 (11.1,13.9) | 21.8 (17.7,26.0) | 11.4 (8.4,14.5)  | 9.7 (6.9,12.4)   | 9.8 (7.0,12.6)  | 9.8 (6.8,12.8)  | 12.0 (6.5,15.3)  | Metropolitan |
|        | Gyeonggi-do | Gwangmyeong-si | 11.2 (9.9,12.5)  | 13.9 (10.4,17.3) | 11.9 (8.9,14.9)  | 11.7 (8.6,14.7)  | 8.9 (6.2,11.6)  | 10.0 (7.1,12.9) | 3.9 (2.0,10.4)   | Urban        |
|        | Gyeonggi-do | Pyeongtaek-si  | 12.0 (11.1,12.9) | 19.2 (16.6,21.8) | 12.5 (10.3,14.6) | 10.0 (8.1,11.9)  | 9.8 (7.9,11.7)  | 8.7 (6.9,10.4)  | 10.5 (8.5,14.5)  | Urban        |
|        | Gyeonggi-do | Dongducheon-si | 13.2 (11.8,14.5) | 19.5 (15.8,23.2) | 15.0 (11.8,18.2) | 13.6 (10.7,16.5) | 9.2 (6.7,11.8)  | 8.8 (6.4,11.2)  | 10.7 (6.9,15.7)  | Urban        |
|        | Gyeonggi-do | Sangnok-gu     | 11.1 (9.7,12.5)  | 18.2 (14.1,22.2) | 10.0 (6.9,13.1)  | 9.0 (6.0,11.9)   | 9.5 (6.6,12.3)  | 8.6 (5.8,11.4)  | 9.6 (7.9,16.5)   | Metropolitan |
|        | Gyeonggi-do | Danwon-gu      | 11.7 (10.2,13.2) | 17.9 (13.6,22.2) | 12.4 (9.1,15.8)  | 10.2 (7.1,13.3)  | 9.6 (6.5,12.6)  | 8.7 (5.7,11.6)  | 9.2 (3.5,11.7)   | Metropolitan |
|        | Gyeonggi-do | Deogyang-gu    | 12.8 (11.4,14.1) | 21.8 (17.7,25.9) | 13.2 (10.2,16.3) | 9.5 (6.9,12.2)   | 9.2 (6.6,11.8)  | 10.3 (7.5,13.2) | 11.5 (5.1,13.9)  | Metropolitan |
|        | Gyeonggi-do | Ilsandong-gu   | 9.4 (8.2,10.7)   | 13.5 (10.0,17.1) | 10.1 (7.3,13.0)  | 10.1 (7.3,12.9)  | 8.0 (5.5,10.5)  | 5.8 (3.5,8.2)   | 7.7 (4.3,12.1)   | Metropolitan |
|        | Gyeonggi-do | Ilsanseo-gu    | 9.5 (8.3,10.8)   | 15.5 (11.9,19.1) | 8.7 (5.9,11.4)   | 9.5 (6.9,12.1)   | 7.5 (5.1,9.9)   | 6.8 (4.5,9.1)   | 8.7 (2.6,10.6)   | Metropolitan |
|        | Gyeonggi-do | Gwacheon-si    | 8.8 (7.6,9.9)    | 13.3 (9.9,16.7)  | 8.4 (5.9,10.9)   | 7.6 (5.1,10.0)   | 8.9 (6.3,11.4)  | 5.8 (3.7,7.9)   | 7.5 (3.2,10.6)   | Urban        |
|        | Gyeonggi-do | Guri-si        | 13.2 (11.7,14.7) | 19.9 (15.8,23.9) | 13.8 (10.5,17.1) | 10.7 (7.7,13.6)  | 12.5 (9.4,15.7) | 9.0 (6.2,11.8)  | 10.9 (4.4,13.4)  | Urban        |
|        | Gyeonggi-do | Namyangju-si   | 13.1 (11.7,14.5) | 18.7 (14.9,22.5) | 13.0 (9.9,16.1)  | 11.8 (8.8,14.8)  | 11.6 (8.5,14.6) | 10.5 (7.5,13.4) | 8.2 (4.0,12.8)   | Urban        |
|        | Gyeonggi-do | Osan-si        | 11.4 (9.9,12.9)  | 15.8 (11.8,19.8) | 10.4 (7.4,13.5)  | 10.5 (7.4,13.6)  | 12.5 (9.0,16.0) | 8.2 (5.4,10.9)  | 7.6 (4.1,12.1)   | Urban        |
|        | Gyeonggi-do | Siheung-si     | 11.4 (9.9,12.9)  | 18.6 (14.4,22.8) | 11.9 (8.6,15.2)  | 7.6 (4.9,10.3)   | 9.2 (6.1,12.4)  | 9.8 (6.7,12.8)  | 8.8 (4.8,13.2)   | Urban        |
|        | Gyeonggi-do | Gunpo-si       | 11.8 (10.4,13.2) | 18.3 (14.3,22.3) | 11.0 (8.1,13.9)  | 9.2 (6.3,12.0)   | 11.4 (8.4,14.5) | 9.5 (6.7,12.3)  | 8.8 (1.4,10.0)   | Urban        |
|        | Gyeonggi-do | Uiwang-si      | 10.2 (8.9,11.4)  | 14.7 (11.3,18.1) | 11.6 (8.5,14.8)  | 7.2 (4.8,9.6)    | 9.6 (6.9,12.2)  | 8.3 (5.8,10.9)  | 6.4 (3.5,11.5)   | Urban        |
|        | Gyeonggi-do | Hanam-si       | 12.7 (11.3,14.1) | 17.9 (14.2,21.6) | 13.5 (10.2,16.8) | 11.2 (8.3,14.1)  | 11.4 (8.5,14.3) | 10.1 (7.2,13.0) | 7.8 (3.7,12.3)   | Urban        |
|        | Gyeonggi-do | Cheoin-gu      | 10.7 (9.5,12.0)  | 14.6 (11.3,17.8) | 13.7 (10.5,16.8) | 7.8 (5.5,10.0)   | 10.7 (7.9,13.5) | 7.5 (5.2,9.8)   | 7.1 (0.5,8.3)    | Metropolitan |
|        | Gyeonggi-do | Giheung-gu     | 8.4 (7.3,9.6)    | 13.7 (10.3,17.0) | 8.1 (5.6,10.6)   | 7.7 (5.3,10.0)   | 7.8 (5.3,10.4)  | 5.1 (3.2,7.0)   | 8.6 (3.4,10.4)   | Metropolitan |
|        | Gyeonggi-do | Suji-gu        | 7.9 (6.8,8.9)    | 10.1 (7.3,12.8)  | 9.1 (6.5,11.8)   | 7.3 (5.1,9.6)    | 6.7 (4.5,8.9)   | 6.1 (3.9,8.2)   | 4.0 (1.3,8.3)    | Metropolitan |
|        | Gyeonggi-do | Paju-si        | 12.3 (11.0,13.7) | 19.3 (15.5,23.1) | 13.2 (10.1,16.2) | 10.6 (7.9,13.4)  | 11.0 (8.2,13.8) | 8.1 (5.7,10.5)  | 11.2 (5.1,13.7)  | Urban        |
|        | Gyeonggi-do | Icheon-si      | 12.5 (11.2,13.9) | 16.8 (13.3,20.2) | 12.0 (9.0,15.0)  | 12.4 (9.4,15.3)  | 11.0 (8.3,13.7) | 10.5 (7.7,13.3) | 6.3 (3.4,11.8)   | Urban        |
|        | Gyeonggi-do | Anseong-si     | 12.2 (10.9,13.4) | 18.1 (14.7,21.5) | 12.7 (9.8,15.7)  | 10.0 (7.4,12.6)  | 10.3 (7.7,12.9) | 9.4 (6.9,11.9)  | 8.7 (5.0,13.4)   | Urban        |
|        | Gyeonggi-do | Gimpo-si       | 10.3 (9.1,11.5)  | 15.4 (12.1,18.8) | 10.3 (7.7,13.0)  | 10.0 (7.3,12.6)  | 8.6 (6.2,11.0)  | 7.6 (5.2,9.9)   | 7.8 (4.3,11.9)   | Urban        |
|        | Gyeonggi-do | Hwaseong-si    | 11.4 (10.0,12.7) | 16.6 (13.0,20.2) | 13.1 (9.8,16.5)  | 10.3 (7.4,13.1)  | 8.2 (5.6,10.7)  | 9.0 (6.2,11.9)  | 7.6 (5.2,13.2)   | Urban        |
|        | Gyeonggi-do | Gwangju-si     | 11.8 (10.5,13.1) | 16.0 (12.7,19.4) | 12.3 (9.3,15.2)  | 10.9 (8.2,13.6)  | 10.0 (7.3,12.7) | 9.6 (7.0,12.3)  | 6.4 (2.5,10.7)   | Urban        |

(continued to the next page)

Appendix 4. Continued

| Gender | Provinces         | Districts       | Overall          | Q1 (lowest)      | Q2               | Q3               | Q4               | Q5 (highest)     | Q1-Q5            | Urbanity     |
|--------|-------------------|-----------------|------------------|------------------|------------------|------------------|------------------|------------------|------------------|--------------|
|        | Gyeonggi-do       | Yangju-si       | 13.1 (11.7,14.4) | 20.1 (16.3,24.0) | 12.0 (9.1,14.9)  | 10.3 (7.5,13.0)  | 12.0 (9.2,14.9)  | 11.3 (8.3,14.2)  | 8.8 (3.6,12.2)   | Urban        |
|        | Gyeonggi-do       | Pocheon-si      | 14.0 (12.7,15.3) | 23.0 (18.9,27.1) | 13.3 (10.5,16.1) | 13.2 (10.3,16.1) | 10.5 (7.9,13.1)  | 10.6 (8.0,13.3)  | 12.4 (6.3,15.3)  | Urban        |
|        | Gyeonggi-do       | Yeouju-gun      | 13.7 (12.4,15.0) | 20.1 (16.6,23.6) | 13.9 (11.0,16.8) | 11.3 (8.7,14.0)  | 12.3 (9.6,15.0)  | 11.3 (8.6,13.9)  | 8.8 (1.2,10.2)   | Urban        |
|        | Gyeonggi-do       | Yeoncheon-gun   | 13.4 (12.1,14.7) | 22.6 (18.8,26.4) | 14.4 (11.5,17.2) | 11.3 (8.9,13.8)  | 10.4 (7.9,12.9)  | 9.0 (6.8,11.2)   | 13.6 (6.1,14.9)  | Rural        |
|        | Gyeonggi-do       | Gapyeong-gun    | 12.5 (11.3,13.7) | 21.5 (17.8,25.3) | 13.5 (10.7,16.3) | 11.5 (9.0,14.0)  | 8.2 (6.0,10.3)   | 8.0 (5.8,10.1)   | 13.5 (7.7,16.3)  | Rural        |
|        | Gyeonggi-do       | Yangpyeong-gun  | 12.9 (11.6,14.1) | 18.3 (14.9,21.6) | 15.2 (12.2,18.1) | 10.2 (7.7,12.6)  | 12.4 (9.8,15.0)  | 8.1 (5.9,10.3)   | 10.2 (6.6,15.2)  | Rural        |
|        | Gangwon-do        | Chuncheon-si    | 11.5 (10.3,12.8) | 22.5 (18.3,26.6) | 12.6 (9.7,15.5)  | 8.8 (6.3,11.3)   | 8.0 (5.7,10.4)   | 7.1 (4.9,9.3)    | 15.4 (8.6,17.2)  | Urban        |
|        | Gangwon-do        | Wonju-si        | 11.4 (10.2,12.7) | 18.4 (14.7,22.1) | 12.9 (10.0,15.8) | 8.8 (6.3,11.4)   | 9.9 (7.4,12.5)   | 7.4 (5.0,9.7)    | 11.0 (5.8,14.2)  | Urban        |
|        | Gangwon-do        | Gangneung-si    | 13.6 (12.2,14.9) | 21.9 (17.9,25.9) | 13.4 (10.6,16.3) | 12.5 (9.8,15.2)  | 11.7 (8.9,14.4)  | 8.9 (6.4,11.3)   | 13.0 (9.8,18.6)  | Urban        |
|        | Gangwon-do        | Donghae-si      | 12.2 (10.9,13.4) | 20.3 (16.6,24.0) | 12.4 (9.5,15.3)  | 10.7 (8.1,13.4)  | 7.6 (5.4,9.9)    | 10.0 (7.4,12.7)  | 10.3 (6.1,14.9)  | Urban        |
|        | Gangwon-do        | Taebaek-si      | 18.7 (17.2,20.2) | 26.1 (21.9,30.2) | 21.0 (17.4,24.5) | 18.0 (14.6,21.4) | 14.3 (11.4,17.2) | 14.7 (11.7,17.8) | 11.4 (6.7,16.5)  | Urban        |
|        | Gangwon-do        | Sokcho-si       | 14.7 (13.2,16.1) | 24.3 (20.1,28.5) | 15.6 (12.3,18.8) | 13.1 (10.2,16.1) | 10.2 (7.5,12.8)  | 10.3 (7.5,13.1)  | 14.0 (8.8,18.4)  | Urban        |
|        | Gangwon-do        | Samcheok-si     | 15.1 (13.7,16.4) | 26.6 (22.4,30.8) | 16.2 (13.1,19.3) | 12.3 (9.6,14.9)  | 11.1 (8.5,13.7)  | 9.9 (7.5,12.3)   | 16.7 (9.3,18.7)  | Urban        |
|        | Gangwon-do        | Hongcheon-gun   | 12.4 (11.2,13.6) | 19.9 (16.4,23.3) | 12.2 (9.6,14.8)  | 11.2 (8.6,13.7)  | 9.3 (7.1,11.4)   | 9.4 (7.0,11.8)   | 10.5 (7.9,16.7)  | Rural        |
|        | Gangwon-do        | Hoengseong-gun  | 14.3 (13.0,15.6) | 19.9 (16.5,23.4) | 15.6 (12.6,18.5) | 13.8 (11.1,16.6) | 12.3 (9.7,14.9)  | 10.1 (7.6,12.7)  | 9.8 (5.3,14.1)   | Rural        |
|        | Gangwon-do        | Yeongwol-gun    | 15.2 (13.9,16.6) | 24.5 (20.5,28.5) | 16.3 (13.3,19.3) | 12.7 (10.0,15.3) | 12.1 (9.5,14.7)  | 10.9 (8.4,13.4)  | 13.6 (9.6,18.6)  | Rural        |
|        | Gangwon-do        | Pyeongchang-gun | 14.7 (13.4,16.1) | 23.6 (19.7,27.5) | 16.1 (13.0,19.2) | 12.6 (10.0,15.3) | 11.7 (9.1,14.3)  | 9.9 (7.5,12.4)   | 13.7 (7.3,16.3)  | Rural        |
|        | Gangwon-do        | Jeongseon-gun   | 17.8 (16.4,19.3) | 25.6 (21.6,29.6) | 19.2 (15.9,22.5) | 18.0 (14.8,21.1) | 14.9 (12.0,17.7) | 11.7 (9.0,14.4)  | 13.9 (11.2,20.6) | Rural        |
|        | Gangwon-do        | Cheorwon-gun    | 11.9 (10.7,13.1) | 22.1 (18.4,25.8) | 12.2 (9.6,14.8)  | 8.9 (6.5,11.3)   | 8.8 (6.5,11.2)   | 7.5 (5.3,9.6)    | 14.6 (9.7,18.3)  | Rural        |
|        | Gangwon-do        | Hwacheon-gun    | 13.7 (12.4,15.1) | 21.5 (17.5,25.5) | 14.8 (11.8,17.9) | 11.3 (8.5,14.1)  | 12.7 (9.9,15.6)  | 8.6 (6.2,11.0)   | 12.9 (8.2,17.2)  | Rural        |
|        | Gangwon-do        | Yanggu-gun      | 13.8 (12.5,15.2) | 22.2 (18.2,26.1) | 13.6 (10.5,16.7) | 13.2 (10.4,16.1) | 11.3 (8.5,14.0)  | 9.1 (6.6,11.5)   | 13.1 (7.5,16.5)  | Rural        |
|        | Gangwon-do        | Inje-gun        | 13.2 (11.9,14.4) | 19.5 (15.9,23.0) | 13.7 (10.8,16.5) | 13.5 (10.6,16.3) | 9.7 (7.3,12.1)   | 9.5 (7.0,12.0)   | 10.0 (5.9,14.5)  | Rural        |
|        | Gangwon-do        | Goseong-gun     | 13.7 (12.4,15.0) | 20.5 (16.8,24.2) | 18.1 (14.6,21.6) | 13.0 (10.1,15.9) | 9.2 (6.9,11.5)   | 8.0 (5.8,10.3)   | 12.5 (8.3,17.1)  | Rural        |
|        | Gangwon-do        | Yangyang-gun    | 13.3 (12.0,14.5) | 22.2 (18.4,26.0) | 16.1 (13.0,19.2) | 10.0 (7.5,12.4)  | 10.5 (8.0,13.0)  | 8.0 (5.9,10.1)   | 14.2 (8.8,17.8)  | Rural        |
|        | Chungcheongbuk-do | Cheongju-si     | 11.0 (10.3,11.8) | 17.4 (15.2,19.6) | 12.6 (10.8,14.5) | 9.1 (7.6,10.7)   | 9.1 (7.6,10.5)   | 7.8 (6.4,9.2)    | 9.6 (7.1,11.9)   | Metropolitan |
|        | Chungcheongbuk-do | Chungju-si      | 15.1 (13.7,16.5) | 23.3 (19.4,27.3) | 17.9 (14.6,21.2) | 11.5 (8.9,14.2)  | 11.8 (9.1,14.4)  | 11.2 (8.5,13.9)  | 12.1 (8.6,17.8)  | Urban        |
|        | Chungcheongbuk-do | Jecheon-si      | 12.4 (11.1,13.6) | 19.7 (16.2,23.3) | 12.5 (9.7,15.2)  | 10.9 (8.3,13.5)  | 9.7 (7.3,12.2)   | 9.5 (7.0,12.0)   | 10.2 (5.9,14.7)  | Urban        |
|        | Chungcheongbuk-do | Boeun-gun       | 15.0 (13.7,16.3) | 24.7 (20.7,28.8) | 17.8 (14.6,21.1) | 12.1 (9.6,14.5)  | 9.8 (7.5,12.2)   | 11.8 (9.1,14.5)  | 12.9 (9.1,18.5)  | Rural        |
|        | Chungcheongbuk-do | Okcheon-gun     | 13.3 (12.0,14.6) | 19.6 (16.0,23.1) | 16.1 (13.0,19.3) | 11.1 (8.6,13.6)  | 11.1 (8.6,13.7)  | 8.7 (6.3,11.0)   | 10.9 (5.0,13.8)  | Rural        |
|        | Chungcheongbuk-do | Yeongdong-gun   | 13.0 (11.8,14.2) | 22.0 (18.3,25.7) | 12.9 (10.3,15.5) | 10.3 (8.0,12.6)  | 10.3 (7.8,12.7)  | 9.6 (7.3,12.0)   | 12.4 (7.2,16.2)  | Rural        |
|        | Chungcheongbuk-do | Jincheon-gun    | 13.9 (12.5,15.2) | 20.7 (16.8,24.5) | 11.2 (8.5,13.8)  | 14.3 (11.2,17.5) | 11.6 (8.9,14.3)  | 12.3 (9.4,15.2)  | 8.4 (2.0,11.2)   | Rural        |
|        | Chungcheongbuk-do | Goesan-gun      | 11.3 (10.1,12.5) | 16.0 (12.8,19.2) | 11.2 (8.6,13.8)  | 10.9 (8.2,13.6)  | 9.6 (7.1,12.0)   | 8.9 (6.5,11.3)   | 7.1 (2.1,10.3)   | Rural        |
|        | Chungcheongbuk-do | Eumseong-gun    | 14.1 (12.8,15.3) | 22.0 (18.0,25.9) | 14.8 (11.9,17.8) | 14.0 (11.4,16.6) | 10.2 (7.8,12.5)  | 9.9 (7.5,12.3)   | 12.1 (7.7,16.5)  | Rural        |
|        | Chungcheongbuk-do | Danyang-gun     | 14.6 (13.2,15.9) | 22.9 (19.2,26.7) | 13.3 (10.4,16.2) | 13.0 (10.2,15.7) | 10.1 (7.6,12.5)  | 13.3 (10.4,16.2) | 9.6 (2.2,11.6)   | Rural        |
|        | Chungcheongbuk-do | Jeungpyeong-gun | 12.9 (11.7,14.1) | 24.0 (20.1,28.0) | 12.4 (9.9,15.0)  | 11.7 (9.3,14.1)  | 10.2 (7.8,12.5)  | 6.6 (4.7,8.5)    | 17.4 (11.9,20.5) | Rural        |
|        | Chungcheongnam-do | Cheonan-si      | 13.8 (12.2,15.3) | 19.8 (15.7,23.9) | 16.1 (12.4,19.8) | 12.3 (9.1,15.5)  | 12.2 (9.1,15.4)  | 8.5 (5.9,11.1)   | 11.3 (8.0,16.6)  | Metropolitan |
|        | Chungcheongnam-do | Gongju-si       | 14.1 (12.8,15.3) | 24.9 (21.0,28.9) | 16.1 (13.0,19.2) | 12.3 (9.6,14.9)  | 9.3 (7.1,11.4)   | 7.8 (5.7,9.9)    | 17.1 (13.0,21.8) | Urban        |
|        | Chungcheongnam-do | Boryeong-si     | 16.8 (15.4,18.2) | 28.3 (23.9,32.7) | 18.9 (15.6,22.1) | 12.9 (10.1,15.7) | 12.7 (9.9,15.4)  | 12.1 (9.4,14.9)  | 16.2 (11.4,21.2) | Urban        |
|        | Chungcheongnam-do | Asan-si         | 12.5 (11.2,13.8) | 21.6 (17.5,25.6) | 11.5 (8.7,14.4)  | 11.1 (8.2,14.0)  | 10.4 (7.7,13.1)  | 7.9 (5.6,10.3)   | 13.7 (7.1,15.3)  | Urban        |
|        | Chungcheongnam-do | Seosan-si       | 13.4 (12.1,14.7) | 20.0 (16.4,23.7) | 14.0 (11.0,16.9) | 12.4 (9.6,15.1)  | 11.4 (8.7,14.1)  | 9.1 (6.7,11.5)   | 10.9 (7.0,15.4)  | Urban        |
|        | Chungcheongnam-do | Nonsan-si       | 14.6 (13.3,15.9) | 24.3 (20.4,28.3) | 16.3 (13.3,19.4) | 12.1 (9.3,14.8)  | 10.6 (8.2,13.0)  | 9.4 (6.9,11.8)   | 14.9 (8.8,17.8)  | Urban        |
|        | Chungcheongnam-do | Gyeryong-si     | 10.3 (8.8,11.7)  | 15.1 (11.0,19.1) | 12.1 (8.6,15.6)  | 9.8 (6.6,13.0)   | 8.4 (5.4,11.3)   | 6.2 (3.7,8.8)    | 6.2 (3.7,8.8)    | Urban        |
|        | Chungcheongnam-do | Dangjin-si      | 13.4 (12.1,14.7) | 21.2 (17.5,24.8) | 11.1 (8.4,13.8)  | 12.5 (9.8,15.3)  | 12.5 (9.8,15.3)  | 9.9 (7.4,12.4)   | 11.3 (5.0,14.0)  | Rural        |
|        | Chungcheongnam-do | Geumsan-gun     | 14.1 (12.9,15.4) | 21.0 (17.4,24.6) | 16.9 (13.6,20.1) | 12.7 (10.1,15.3) | 10.8 (8.4,13.2)  | 9.4 (7.1,11.7)   | 11.6 (6.1,15.1)  | Rural        |
|        | Chungcheongnam-do | Buyeo-gun       | 13.5 (12.3,14.8) | 23.3 (19.2,27.3) | 15.2 (12.3,18.2) | 10.3 (8.1,12.5)  | 10.6 (8.2,13.0)  | 8.8 (6.6,10.9)   | 14.5 (9.5,18.5)  | Rural        |
|        | Chungcheongnam-do | Seocheon-gun    | 14.9 (13.5,16.3) | 24.0 (19.9,28.1) | 16.4 (13.3,19.5) | 12.8 (10.1,15.6) | 10.0 (7.6,12.4)  | 11.9 (9.1,14.7)  | 12.1 (5.8,15.4)  | Rural        |
|        | Chungcheongnam-do | Cheongyang-gun  | 13.2 (12.0,14.4) | 23.0 (19.1,26.9) | 13.7 (11.1,16.4) | 11.6 (9.2,13.9)  | 10.1 (7.8,12.5)  | 8.1 (6.1,10.2)   | 14.9 (11.0,19.8) | Rural        |
|        | Chungcheongnam-do | Hongseong-gun   | 14.7 (13.4,16.1) | 23.4 (19.6,27.2) | 14.6 (11.7,17.5) | 14.0 (11.1,16.9) | 11.4 (8.8,14.0)  | 10.5 (7.9,13.0)  | 12.9 (8.8,18.0)  | Rural        |
|        | Chungcheongnam-do | Yesan-gun       | 12.8 (11.6,14.0) | 20.9 (17.3,24.6) | 12.9 (10.2,15.7) | 11.3 (8.9,13.8)  | 9.1 (6.9,11.3)   | 10.1 (7.6,12.5)  | 10.8 (6.6,15.6)  | Rural        |
|        | Chungcheongnam-do | Tae'an-gun      | 13.3 (12.0,14.5) | 17.8 (14.5,21.1) | 14.7 (11.7,17.7) | 12.8 (10.2,15.5) | 11.1 (8.6,13.7)  | 10.2 (7.8,12.6)  | 7.6 (2.2,11.0)   | Urban        |
|        | Jeollabuk-do      | Jeonju-si       | 11.4 (10.1,12.7) | 18.8 (15.0,22.6) | 12.6 (9.6,15.6)  | 9.1 (6.6,11.7)   | 9.0 (6.4,11.6)   | 8.3 (5.9,10.7)   | 10.5 (6.3,14.9)  | Metropolitan |
|        | Jeollabuk-do      | Gunsan-si       | 14.6 (13.2,16.0) | 22.1 (18.2,26.0) | 12.9 (9.8,15.9)  | 13.2 (10.3,16.2) | 13.1 (10.1,16.1) | 12.3 (9.4,15.1)  | 9.8 (5.6,14.8)   | Urban        |
|        | Jeollabuk-do      | Iksan-si        | 15.2 (13.8,16.6) | 25.7 (21.5,29.9) | 15.6 (12.5,18.7) | 14.3 (11.4,17.3) | 10.8 (8.1,13.4)  | 10.1 (7.6,12.6)  | 15.6 (12.2,21.6) | Urban        |
|        | Jeollabuk-do      | Jeongeup-si     | 16.4 (14.9,17.8) | 26.2 (22.0,30.5) | 18.0 (14.7,21.3) | 14.8 (11.9,17.7) | 11.5 (8.9,14.1)  | 11.8 (9.0,14.6)  | 14.4 (8.2,18.0)  | Urban        |
|        | Jeollabuk-do      | Namwon-si       | 15.2 (13.8,16.5) | 23.7 (19.7,27.6) | 18.0 (14.7,21.4) | 13.7 (10.9,16.6) | 9.8 (7.4,12.1)   | 11.0 (8.5,13.6)  | 12.7 (9.5,18.7)  | Urban        |
|        | Jeollabuk-do      | Gimje-si        | 15.7 (14.4,17.1) | 25.7 (21.6,29.8) | 15.9 (12.9,18.9) | 14.0 (11.2,16.9) | 12.9 (10.2,15.6) | 10.6 (8.0,13.2)  | 15.1 (9.1,18.7)  | Urban        |
|        | Jeollabuk-do      | Wanju-gun       | 13.3 (12.1,14.5) | 18.9 (15.5,22.2) | 17.8 (14.5,21.0) | 11.9 (9.4,14.3)  | 8.5 (6.3,10.7)   | 9.6 (7.3,11.9)   | 9.3 (6.2,14.8)   | Rural        |
|        | Jeollabuk-do      | Jinan-gun       | 13.2 (11.9,14.4) | 19.9 (16.4,23.5) | 15.6 (12.5,18.6) | 11.3 (8.9,13.8)  | 10.6 (8.2,13.0)  | 8.2 (6.1,10.3)   | 11.7 (7.9,17.1)  | Rural        |
|        | Jeollabuk-do      | Muju-gun        | 14.2 (12.8,15.5) | 23.4 (19.4,27.4) | 15.4 (12.5,18.4) | 12.8 (10.1,15.6) | 10.3 (7.9,12.7)  | 8.4 (6.1,10.6)   | 15.0 (10.2,19.6) | Rural        |
|        | Jeollabuk-do      | Jangsu-gun      | 15.5 (14.2,16.9) | 24.6 (20.4,28.7) | 17.0 (13.8,20.2) | 13.3 (10.5,16.0) | 11.7 (9.2,14.2)  | 11.6 (9.0,14.2)  | 13.0 (6.8,16.6)  | Rural        |

(continued to the next page)

## Appendix 4. Continued

| Gender | Provinces        | Districts      | Overall          | Q1 (lowest)      | Q2               | Q3               | Q4               | Q5 (highest)     | Q1-Q5            | Urbanity     |
|--------|------------------|----------------|------------------|------------------|------------------|------------------|------------------|------------------|------------------|--------------|
|        | Jeollabuk-do     | Imsil-gun      | 15.1 (13.7,16.4) | 23.6 (19.4,27.9) | 14.8 (12.1,17.5) | 15.2 (12.2,18.2) | 13.5 (10.8,16.3) | 8.1 (6.1,10.2)   | 15.5 (13.6,22.6) | Rural        |
|        | Jeollabuk-do     | Sunchang-gun   | 14.9 (13.5,16.3) | 22.6 (18.8,26.5) | 19.8 (16.2,23.4) | 12.4 (9.9,14.9)  | 11.3 (8.6,14.0)  | 8.3 (6.1,10.4)   | 14.3 (11.0,20.4) | Rural        |
|        | Jeollabuk-do     | Gochang-gun    | 17.9 (16.4,19.4) | 29.8 (25.1,34.6) | 18.7 (15.3,22.1) | 14.8 (11.9,17.7) | 16.2 (13.0,19.4) | 10.7 (8.2,13.1)  | 19.1 (13.7,23.5) | Rural        |
|        | Jeollabuk-do     | Buan-gun       | 17.2 (15.7,18.6) | 29.1 (24.7,33.6) | 19.1 (15.5,22.7) | 15.9 (12.8,18.9) | 9.8 (7.4,12.1)   | 11.5 (8.8,14.1)  | 17.6 (12.4,22.8) | Rural        |
|        | Jeollanam-do     | Mokpo-si       | 14.0 (12.6,15.4) | 24.2 (20.0,28.4) | 15.9 (12.5,19.3) | 12.5 (9.6,15.4)  | 10.4 (7.7,13.1)  | 7.3 (5.0,9.6)    | 16.9 (9.8,18.6)  | Urban        |
|        | Jeollanam-do     | Yeosu-si       | 13.2 (11.9,14.5) | 21.6 (17.8,25.4) | 13.5 (10.7,16.3) | 9.8 (7.3,12.4)   | 10.2 (7.6,12.8)  | 11.0 (8.2,13.8)  | 10.6 (5.6,14.6)  | Urban        |
|        | Jeollanam-do     | Suncheon-si    | 12.2 (10.9,13.4) | 20.1 (16.4,23.8) | 13.9 (10.8,17.0) | 8.8 (6.4,11.2)   | 8.1 (5.7,10.5)   | 10.0 (7.4,12.6)  | 10.1 (7.3,16.3)  | Urban        |
|        | Jeollanam-do     | Naju-si        | 14.9 (13.6,16.3) | 26.5 (22.4,30.7) | 14.5 (11.6,17.4) | 13.3 (10.5,16.1) | 11.1 (8.6,13.5)  | 9.2 (6.9,11.5)   | 17.3 (13.1,22.5) | Urban        |
|        | Jeollanam-do     | Gwangyang-si   | 11.2 (9.9,12.5)  | 18.0 (14.2,21.7) | 12.5 (9.4,15.5)  | 9.9 (6.9,12.8)   | 7.9 (5.4,10.3)   | 8.2 (5.5,10.8)   | 9.8 (4.2,12.2)   | Urban        |
|        | Jeollanam-do     | Damyang-gun    | 14.7 (13.4,16.0) | 25.7 (21.6,29.9) | 15.6 (12.5,18.6) | 13.4 (10.8,16.0) | 9.5 (7.4,11.7)   | 9.6 (7.2,12.0)   | 16.1 (12.1,21.1) | Rural        |
|        | Jeollanam-do     | Gokseong-gun   | 14.1 (12.8,15.5) | 20.9 (17.0,24.8) | 14.9 (11.8,17.9) | 13.9 (11.0,16.7) | 9.1 (6.8,11.3)   | 12.4 (9.6,15.3)  | 8.5 (3.9,13.5)   | Rural        |
|        | Jeollanam-do     | Gurye-gun      | 11.7 (10.5,12.9) | 23.1 (19.1,27.1) | 13.8 (10.9,16.8) | 7.4 (5.5,9.3)    | 9.0 (6.7,11.2)   | 5.9 (4.1,7.8)    | 17.2 (11.2,20.2) | Rural        |
|        | Jeollanam-do     | Goheung-gun    | 14.4 (13.1,15.8) | 30.2 (25.3,35.1) | 13.3 (10.6,16.0) | 11.8 (9.4,14.2)  | 11.1 (8.6,13.6)  | 7.0 (5.1,8.8)    | 23.2 (18.9,28.1) | Rural        |
|        | Jeollanam-do     | Boseong-gun    | 15.2 (13.8,16.6) | 25.5 (21.1,29.8) | 19.3 (15.9,22.8) | 12.8 (10.2,15.3) | 10.4 (8.0,12.8)  | 7.8 (5.9,9.8)    | 17.7 (13.7,23.5) | Rural        |
|        | Jeollanam-do     | Hwasun-gun     | 15.9 (14.5,17.3) | 25.5 (21.3,29.6) | 16.0 (13.0,19.1) | 15.2 (12.2,18.2) | 10.8 (8.2,13.4)  | 12.2 (9.4,15.0)  | 13.3 (8.1,18.1)  | Rural        |
|        | Jeollanam-do     | Jangheung-gun  | 15.2 (13.8,16.6) | 29.8 (25.0,34.5) | 15.9 (12.9,18.9) | 12.5 (9.8,15.2)  | 9.4 (7.3,11.5)   | 9.4 (6.8,11.9)   | 20.4 (12.9,22.5) | Rural        |
|        | Jeollanam-do     | Gangjin-gun    | 12.0 (10.8,13.2) | 21.0 (17.1,25.0) | 14.7 (11.6,17.8) | 10.9 (8.4,13.4)  | 9.2 (6.8,11.5)   | 4.9 (3.4,6.4)    | 16.1 (10.8,19.2) | Rural        |
|        | Jeollanam-do     | Haenam-gun     | 15.6 (14.2,17.0) | 26.2 (21.8,30.7) | 14.8 (11.8,17.7) | 13.6 (10.9,16.3) | 12.8 (10.0,15.6) | 11.7 (9.0,14.5)  | 14.5 (7.7,17.3)  | Rural        |
|        | Jeollanam-do     | Yeongam-gun    | 15.0 (13.6,16.3) | 24.6 (20.7,28.6) | 16.5 (13.4,19.6) | 12.2 (9.4,14.9)  | 11.6 (9.1,14.2)  | 10.3 (7.8,12.7)  | 14.3 (10.3,19.5) | Rural        |
|        | Jeollanam-do     | Muan-gun       | 13.7 (12.4,15.0) | 20.5 (16.8,24.1) | 14.4 (11.5,17.3) | 13.9 (11.1,16.7) | 9.9 (7.6,12.2)   | 10.5 (7.9,13.1)  | 10.0 (6.3,15.3)  | Rural        |
|        | Jeollanam-do     | Hampyeong-gun  | 15.6 (14.2,17.0) | 25.5 (21.3,29.7) | 16.1 (13.0,19.2) | 13.1 (10.3,16.0) | 12.9 (10.2,15.7) | 10.2 (7.8,12.6)  | 15.3 (9.3,18.7)  | Rural        |
|        | Jeollanam-do     | Yeonggwang-gun | 15.8 (14.5,17.2) | 26.3 (22.2,30.4) | 18.7 (15.4,22.0) | 15.0 (12.0,17.9) | 11.2 (8.8,13.7)  | 8.3 (6.1,10.4)   | 18.0 (14.7,24.1) | Rural        |
|        | Jeollanam-do     | Jangseong-gun  | 15.3 (14.0,16.7) | 25.8 (21.6,29.9) | 15.6 (12.5,18.8) | 12.8 (10.1,15.4) | 12.1 (9.5,14.8)  | 10.6 (8.1,13.1)  | 15.2 (7.2,17.0)  | Rural        |
|        | Jeollanam-do     | Wando-gun      | 15.7 (14.4,17.1) | 28.8 (24.4,33.3) | 16.7 (13.7,19.7) | 12.0 (9.6,14.4)  | 12.6 (10.0,15.3) | 8.9 (6.6,11.1)   | 19.9 (15.4,24.8) | Rural        |
|        | Jeollanam-do     | Jindo-gun      | 15.4 (14.1,16.8) | 26.8 (22.4,31.1) | 17.4 (14.2,20.6) | 13.1 (10.6,15.7) | 9.9 (7.7,12.1)   | 9.9 (7.5,12.4)   | 16.9 (12.3,21.7) | Rural        |
|        | Jeollanam-do     | Sinan-gun      | 16.7 (15.3,18.1) | 24.4 (20.5,28.3) | 18.9 (15.7,22.1) | 16.3 (13.1,19.5) | 12.2 (9.7,14.7)  | 11.0 (8.4,13.7)  | 13.4 (10.5,20.1) | Rural        |
|        | Gyeongsangbuk-do | Nam-gu         | 13.8 (12.4,15.2) | 23.9 (19.8,27.9) | 14.8 (11.7,17.9) | 12.1 (9.0,15.1)  | 9.5 (6.7,12.2)   | 8.7 (6.3,11.2)   | 15.2 (10.9,19.5) | Metropolitan |
|        | Gyeongsangbuk-do | Buk-gu         | 12.4 (11.1,13.7) | 19.0 (15.4,22.7) | 12.6 (9.8,15.4)  | 11.0 (8.2,13.8)  | 9.8 (7.2,12.4)   | 9.5 (6.9,12.1)   | 9.5 (5.9,14.3)   | Metropolitan |
|        | Gyeongsangbuk-do | Gyeongju-si    | 15.2 (13.8,16.6) | 23.5 (19.6,27.5) | 15.0 (11.9,18.1) | 14.9 (12.0,17.9) | 10.9 (8.3,13.4)  | 12.0 (9.2,14.8)  | 11.5 (5.8,15.0)  | Urban        |
|        | Gyeongsangbuk-do | Gimcheon-si    | 14.8 (13.5,16.2) | 22.9 (19.2,26.7) | 16.0 (12.9,19.1) | 14.2 (11.2,17.1) | 10.1 (7.6,12.6)  | 10.8 (8.2,13.4)  | 12.1 (6.6,15.8)  | Urban        |
|        | Gyeongsangbuk-do | Andong-si      | 14.2 (12.9,15.6) | 23.8 (19.8,27.7) | 15.2 (12.3,18.1) | 13.2 (10.4,16.1) | 9.9 (7.6,12.3)   | 9.8 (7.3,12.2)   | 14.0 (8.2,17.0)  | Urban        |
|        | Gyeongsangbuk-do | Gumi-si        | 14.6 (13.4,15.8) | 22.7 (19.3,26.1) | 14.6 (12.0,17.2) | 14.3 (11.6,17.0) | 11.7 (9.3,14.1)  | 11.1 (8.9,13.4)  | 11.6 (6.6,13.2)  | Urban        |
|        | Gyeongsangbuk-do | Yeongju-si     | 14.8 (13.4,16.1) | 26.1 (21.8,30.3) | 14.0 (11.2,16.9) | 13.9 (11.1,16.8) | 11.6 (8.9,14.2)  | 8.6 (6.4,10.8)   | 17.5 (11.7,20.9) | Urban        |
|        | Gyeongsangbuk-do | Yeongcheon-si  | 16.7 (15.2,18.1) | 24.3 (20.3,28.3) | 19.6 (16.1,23.1) | 14.9 (12.1,17.7) | 10.9 (8.4,13.4)  | 13.6 (10.6,16.5) | 10.7 (7.2,17.0)  | Urban        |
|        | Gyeongsangbuk-do | Sangju-si      | 15.2 (13.8,16.5) | 23.4 (19.6,27.1) | 14.9 (12.1,17.7) | 13.8 (11.0,16.5) | 13.3 (10.6,15.9) | 10.3 (7.8,12.7)  | 13.1 (8.6,17.6)  | Urban        |
|        | Gyeongsangbuk-do | Mungyeong-si   | 15.7 (14.4,17.1) | 25.0 (21.0,28.9) | 12.5 (9.8,15.2)  | 16.2 (13.1,19.3) | 12.6 (9.9,15.3)  | 12.6 (9.7,15.5)  | 12.4 (5.8,15.8)  | Urban        |
|        | Gyeongsangbuk-do | Gyeongsan-si   | 15.3 (13.9,16.7) | 23.6 (19.6,27.7) | 15.1 (12.1,18.2) | 11.9 (9.0,14.8)  | 13.6 (10.6,16.7) | 12.3 (9.4,15.2)  | 11.3 (4.1,13.3)  | Urban        |
|        | Gyeongsangbuk-do | Gunwi-gun      | 14.6 (13.3,15.9) | 22.2 (18.1,26.3) | 16.6 (13.5,19.7) | 13.1 (10.5,15.6) | 11.7 (9.1,14.2)  | 10.1 (7.7,12.5)  | 12.1 (5.2,14.6)  | Rural        |
|        | Gyeongsangbuk-do | Uiseong-gun    | 13.6 (12.4,14.9) | 18.5 (15.0,22.0) | 15.6 (12.6,18.6) | 12.0 (9.5,14.5)  | 11.5 (8.9,14.2)  | 11.1 (8.4,13.7)  | 7.4 (3.1,12.3)   | Rural        |
|        | Gyeongsangbuk-do | Cheongsong-gun | 16.9 (15.4,18.4) | 27.8 (23.2,32.4) | 16.1 (13.2,19.0) | 14.7 (11.8,17.6) | 12.3 (9.7,14.9)  | 14.0 (10.8,17.3) | 13.8 (9.2,19.2)  | Rural        |
|        | Gyeongsangbuk-do | Yeongyang-gun  | 17.3 (15.8,18.7) | 24.5 (20.6,28.4) | 21.0 (17.5,24.5) | 15.3 (12.4,18.3) | 13.6 (10.8,16.3) | 11.6 (8.9,14.3)  | 12.9 (11.0,20.6) | Rural        |
|        | Gyeongsangbuk-do | Yeongdeok-gun  | 16.7 (15.2,18.3) | 30.3 (25.3,35.3) | 20.3 (16.6,23.9) | 12.9 (10.1,15.8) | 10.8 (8.3,13.3)  | 9.7 (7.2,12.2)   | 20.6 (12.2,21.8) | Rural        |
|        | Gyeongsangbuk-do | Cheongdo-gun   | 16.1 (14.7,17.6) | 27.9 (23.3,32.5) | 14.7 (11.8,17.5) | 14.8 (11.9,17.7) | 13.1 (10.2,15.9) | 10.7 (8.1,13.2)  | 17.2 (9.5,19.5)  | Rural        |
|        | Gyeongsangbuk-do | Goryeong-gun   | 14.7 (13.3,16.0) | 21.1 (17.4,24.8) | 14.2 (11.3,17.1) | 14.0 (11.1,16.9) | 12.0 (9.4,14.6)  | 12.0 (9.3,14.8)  | 9.1 (3.7,13.3)   | Rural        |
|        | Gyeongsangbuk-do | Seongju-gun    | 10.4 (9.3,11.5)  | 18.8 (15.3,22.3) | 10.6 (8.2,13.1)  | 7.4 (5.3,9.5)    | 7.5 (5.5,9.5)    | 7.7 (5.7,9.8)    | 11.1 (7.8,16.0)  | Rural        |
|        | Gyeongsangbuk-do | Chilgok-gun    | 14.8 (13.3,16.3) | 24.2 (20.0,28.4) | 15.5 (12.0,18.9) | 13.6 (10.6,16.7) | 9.1 (6.5,11.6)   | 11.7 (8.7,14.7)  | 12.5 (7.1,16.3)  | Rural        |
|        | Gyeongsangbuk-do | Yecheon-gun    | 16.1 (14.7,17.6) | 31.0 (26.2,35.8) | 15.0 (12.1,18.0) | 14.7 (11.7,17.6) | 11.3 (8.8,13.9)  | 9.4 (7.0,11.8)   | 21.6 (12.7,22.7) | Rural        |
|        | Gyeongsangbuk-do | Bonghwa-gun    | 15.9 (14.5,17.2) | 23.5 (19.7,27.4) | 15.7 (12.8,18.6) | 17.3 (14.0,20.5) | 10.6 (8.3,12.8)  | 12.0 (9.2,14.8)  | 11.5 (5.3,14.9)  | Rural        |
|        | Gyeongsangbuk-do | Uljin-gun      | 15.1 (13.8,16.5) | 23.2 (19.3,27.1) | 15.8 (12.7,18.9) | 11.4 (9.0,13.8)  | 13.2 (10.3,16.0) | 12.5 (9.8,15.2)  | 10.7 (6.1,16.1)  | Rural        |
|        | Gyeongsangbuk-do | Ulleung-gun    | 13.1 (11.8,14.4) | 21.7 (17.9,25.5) | 14.5 (11.4,17.6) | 11.3 (8.8,13.9)  | 9.1 (6.7,11.4)   | 9.4 (6.9,11.9)   | 12.3 (8.9,18.3)  | Rural        |
|        | Gyeongsangnam-do | Changwon-si    | 13.6 (11.9,15.2) | 18.6 (14.2,22.9) | 15.2 (11.1,19.4) | 13.4 (10.0,16.9) | 11.3 (8.0,14.7)  | 9.5 (6.2,12.8)   | 9.1 (6.0,14.6)   | Metropolitan |
|        | Gyeongsangnam-do | Masan-si       | 12.6 (11.3,13.9) | 19.9 (16.2,23.6) | 11.3 (8.6,13.9)  | 11.8 (9.0,14.5)  | 11.6 (8.7,14.5)  | 8.6 (6.1,11.1)   | 11.3 (6.2,14.8)  | Metropolitan |
|        | Gyeongsangnam-do | Jinju-si       | 12.8 (11.5,14.1) | 22.7 (18.6,26.8) | 11.4 (8.7,14.2)  | 12.4 (9.4,15.3)  | 10.6 (7.9,13.3)  | 7.1 (4.8,9.4)    | 15.6 (10.1,18.9) | Urban        |
|        | Gyeongsangnam-do | Jinhae-si      | 13.1 (11.7,14.5) | 21.5 (17.2,25.7) | 13.3 (10.3,16.4) | 13.1 (9.9,16.3)  | 10.4 (7.6,13.1)  | 8.1 (5.6,10.6)   | 13.4 (7.7,16.5)  | Metropolitan |
|        | Gyeongsangnam-do | Tongyeong-si   | 16.2 (14.7,17.6) | 26.7 (22.4,31.1) | 18.3 (15.0,21.7) | 14.2 (11.1,17.4) | 11.7 (8.9,14.5)  | 10.1 (7.5,12.8)  | 16.6 (11.3,20.5) | Urban        |
|        | Gyeongsangnam-do | Sacheon-si     | 15.1 (13.7,16.5) | 25.8 (21.7,30.0) | 15.8 (12.4,19.1) | 11.0 (8.4,13.5)  | 12.1 (9.3,14.9)  | 11.4 (8.6,14.2)  | 14.4 (8.5,18.1)  | Urban        |
|        | Gyeongsangnam-do | Gimhae-si      | 13.8 (12.2,15.3) | 22.4 (17.9,27.0) | 13.9 (10.6,17.2) | 11.9 (8.6,15.2)  | 10.2 (7.4,13.1)  | 11.5 (8.2,14.8)  | 10.9 (5.6,14.6)  | Urban        |
|        | Gyeongsangnam-do | Miryang-si     | 14.8 (13.4,16.1) | 27.0 (22.9,31.1) | 15.9 (12.8,18.9) | 12.0 (9.4,14.6)  | 8.8 (6.6,11.1)   | 10.4 (7.9,12.9)  | 16.6 (13.6,22.8) | Urban        |
|        | Gyeongsangnam-do | Geoje-si       | 13.6 (12.1,15.2) | 20.3 (16.1,24.4) | 12.9 (9.5,16.3)  | 12.0 (8.7,15.4)  | 10.8 (7.8,13.7)  | 12.1 (8.9,15.2)  | 8.2 (3.9,12.9)   | Urban        |
|        | Gyeongsangnam-do | Yangsang-si    | 11.4 (10.1,12.7) | 17.3 (13.7,20.9) | 12.2 (9.1,15.4)  | 9.0 (6.5,11.4)   | 9.6 (6.8,12.5)   | 9.3 (6.6,11.9)   | 8.0 (3.4,12.0)   | Urban        |

(continued to the next page)











## Appendix 4. Continued

| Gender | Provinces        | Districts       | Overall          | Q1 (lowest)      | Q2               | Q3               | Q4               | Q5 (highest)     | Q1-Q5           | Urbanity |
|--------|------------------|-----------------|------------------|------------------|------------------|------------------|------------------|------------------|-----------------|----------|
|        | Gyeongsangnam-do | Sacheon-si      | 17.8 (16.5,19.1) | 25.4 (21.7,29.1) | 20.3 (17.2,23.4) | 15.7 (13.1,18.4) | 14.6 (12.1,17.2) | 13.5 (11.0,15.9) | 11.9 (6.4,15.2) | Urban    |
|        | Gyeongsangnam-do | Gimhae-si       | 18.5 (17.0,20.0) | 23.4 (19.5,27.4) | 18.4 (15.1,21.7) | 17.4 (14.2,20.6) | 16.0 (13.0,19.1) | 17.6 (14.4,20.8) | 5.8 (1.4,10.6)  | Urban    |
|        | Gyeongsangnam-do | Miryang-si      | 19.1 (17.8,20.4) | 25.7 (22.3,29.2) | 21.2 (18.1,24.3) | 20.3 (17.2,23.3) | 15.4 (12.9,17.8) | 13.1 (10.8,15.4) | 12.6 (9.3,18.1) | Urban    |
|        | Gyeongsangnam-do | Geoje-si        | 18.5 (16.9,20.0) | 21.6 (17.9,25.4) | 20.5 (16.9,24.2) | 19.0 (15.5,22.5) | 16.0 (12.7,19.2) | 15.2 (12.1,18.2) | 6.4 (1.6,10.8)  | Urban    |
|        | Gyeongsangnam-do | Yangsang-si     | 15.2 (13.9,16.5) | 23.1 (19.5,26.6) | 15.5 (12.4,18.5) | 13.8 (11.1,16.6) | 12.1 (9.5,14.6)  | 11.8 (9.3,14.4)  | 11.3 (4.2,13.0) | Urban    |
|        | Gyeongsangnam-do | Uiryeong-gun    | 18.0 (16.7,19.3) | 22.5 (19.1,25.9) | 20.4 (17.1,23.7) | 16.2 (13.5,18.8) | 15.9 (13.3,18.5) | 15.6 (12.7,18.5) | 6.9 (5.6,14.6)  | Rural    |
|        | Gyeongsangnam-do | Haman-gun       | 17.6 (16.4,18.8) | 22.1 (18.9,25.3) | 17.9 (15.2,20.7) | 17.5 (14.8,20.2) | 14.7 (12.2,17.2) | 16.0 (13.3,18.7) | 6.1 (2.6,11.6)  | Rural    |
|        | Gyeongsangnam-do | Changnyeong-gun | 20.7 (19.3,22.1) | 25.8 (22.1,29.4) | 21.9 (18.8,24.9) | 18.7 (15.8,21.5) | 18.1 (15.5,20.8) | 19.3 (16.2,22.5) | 6.5 (-0.3,9.3)  | Rural    |
|        | Gyeongsangnam-do | Goseong-gun     | 17.3 (16.1,18.6) | 20.5 (17.3,23.7) | 18.2 (15.5,21.0) | 17.9 (15.1,20.8) | 17.2 (14.3,20.0) | 12.9 (10.5,15.2) | 7.6 (3.3,11.9)  | Rural    |
|        | Gyeongsangnam-do | Namhae-gun      | 23.5 (22.0,25.1) | 32.8 (28.3,37.4) | 25.8 (22.2,29.4) | 22.8 (19.4,26.1) | 19.2 (16.3,22.1) | 17.7 (14.6,20.8) | 15.1 (9.8,19.4) | Rural    |
|        | Gyeongsangnam-do | Hadong-gun      | 23.5 (22.0,25.0) | 30.7 (26.4,34.9) | 27.1 (23.5,30.8) | 20.6 (17.5,23.6) | 18.8 (16.1,21.6) | 20.4 (17.1,23.7) | 10.3 (2.6,12.4) | Rural    |
|        | Gyeongsangnam-do | Sancheong-gun   | 20.8 (19.4,22.2) | 27.1 (23.1,31.1) | 23.6 (20.2,27.0) | 19.5 (16.7,22.2) | 18.2 (15.5,21.0) | 15.6 (12.9,18.3) | 11.5 (6.8,16.0) | Rural    |
|        | Gyeongsangnam-do | Hamyang-gun     | 20.6 (19.2,22.0) | 23.7 (20.3,27.2) | 22.3 (19.0,25.5) | 19.4 (16.5,22.3) | 19.2 (16.2,22.2) | 18.5 (15.4,21.7) | 5.2 (0.9,10.3)  | Rural    |
|        | Gyeongsangnam-do | Geochang-gun    | 18.1 (16.8,19.3) | 25.2 (21.7,28.7) | 17.2 (14.5,19.8) | 19.1 (16.2,22.1) | 15.1 (12.6,17.6) | 13.9 (11.5,16.4) | 11.3 (6.2,15.2) | Rural    |
|        | Gyeongsangnam-do | Hapcheon-gun    | 21.0 (19.6,22.4) | 25.7 (21.9,29.6) | 24.5 (20.9,28.0) | 21.8 (18.6,25.0) | 18.5 (15.6,21.5) | 14.7 (12.3,17.1) | 11.0 (3.8,13.0) | Rural    |
|        | Jeju-do          | Jeju-si         | 16.6 (15.9,17.4) | 24.3 (22.1,26.5) | 19.6 (17.6,21.6) | 14.3 (12.6,16.0) | 12.7 (11.2,14.2) | 12.9 (11.4,14.4) | 11.4 (9.1,14.3) | Urban    |
|        | Jeju-do          | Seogwipo-si     | 16.4 (15.6,17.1) | 23.3 (21.2,25.4) | 17.3 (15.6,19.1) | 14.9 (13.3,16.6) | 13.0 (11.5,14.4) | 13.8 (12.2,15.4) | 9.5 (6.1,11.5)  | Urban    |
