# Supplementary material for: Income gaps in self-rated poor health and its association with life expectancy in 245 districts of Korea
Source: PubMed Central journal article supplement (PMC5543297; doi:10.4178/epih.e2017011), 2017-03-15
Supplement: epih-39-e2017011-app5.pdf [file epih-39-e2017011-app5.pdf]

**Appendix 5.** Mean equivalized household income and its relative ratios and absolute differences among metropolitan, urban, and rural areas: findings for total study population, those with the lowest and highest income quintiles using the Community Health Survey in South Korea, 2008-2014

| Subjects                           | Measures                      | Metropolitan | Urban   | Rural     |
|------------------------------------|-------------------------------|--------------|---------|-----------|
| Total study population             | Mean equivalized house income | 2,119.2      | 1,831.9 | 1,407.1   |
|                                    | Standard deviation            | 1,971.4      | 1,826.9 | 1,830.1   |
|                                    | Relative ratio                | 1.5          | 1.3     | Reference |
|                                    | Absolute difference           | 712.1        | 424.8   | Reference |
| Those with Lowest income quintile  | Mean equivalized house income | 818.7        | 674.7   | 444.8     |
|                                    | Standard deviation            | 410.5        | 391.8   | 292.2     |
|                                    | Relative ratio                | 1.8          | 1.5     | Reference |
|                                    | Absolute difference           | 373.9        | 229.9   | Reference |
| Those with Highest income quintile | Mean equivalized house income | 4,088.0      | 3,638.5 | 3,036.4   |
|                                    | Standard deviation            | 3,496.9      | 3,245.4 | 3,453.5   |
|                                    | Relative ratio                | 1.3          | 1.2     | Reference |
|                                    | Absolute difference           | 1,051.6      | 602.1   | Reference |
