# Supplementary material for: Income gaps in self-rated poor health and its association with life expectancy in 245 districts of Korea
Source: PubMed Central journal article supplement (PMC5543297; doi:10.4178/epih.e2017011), 2017-03-15
Supplement: epih-39-e2017011-supplementary.pdf [file epih-39-e2017011-supplementary.pdf]

## 우리나라 245 개 시군구 자가평가 불건강 유병률의 소득수준 간 격차 및 기대수명과의 상관성

김익한<sup>1</sup>, 박진욱<sup>2,3</sup>, 윤성철<sup>4</sup>, 강영호<sup>1,2\*</sup>

<sup>1</sup>서울대학교 의과대학 의료관리학교실; <sup>2</sup>서울대학교 의학연구원 의료관리학연구소; <sup>3</sup>계명대학교 공중보건학과; <sup>4</sup>울산대학교 의과대학 의학통계학교실

## Income gaps in self-rated poor health and its association with life expectancy in 245 districts of Korea

Ikhan Kim<sup>1</sup>, Jinwook Bahk<sup>2,3</sup>, Sung-Cheol Yun<sup>4</sup>, Young-Ho Khang<sup>1,2\*</sup>

<sup>1</sup>Department of Health Policy and Management, Seoul National University College of Medicine, Seoul, Korea; <sup>2</sup>Institute of Health Policy and Management, Seoul National University Medical Research Center, Seoul, Korea; <sup>3</sup>Department of Public Health, Keimyung University, Daegu, Korea; <sup>4</sup>Department of Clinical Epidemiology and Biostatistics, Asan Medical Center, University of Ulsan College of Medicine, Seoul, Korea

### ABSTRACT

**OBJECTIVES:** To examine the income gaps associated with self-rated poor health at the district level in Korea and to identify the geographical correlations between self-rated poor health, life expectancy, and the associated income gaps.

**METHODS:** We analyzed data for 1,578,189 participants from the Community Health Survey of Korea collected between 2008 and 2014. The age-standardized prevalence of self-rated poor health and the associated income gaps were calculated. Previously released data on life expectancy and the associated income gaps were also used. We performed correlation and regression analyses for self-rated poor health, life expectancy, and associated income gaps.

**RESULTS:** Across 245 districts, the median prevalence of self-rated poor health was 15.7% (95% confidence interval [CI], 14.6 to 16.8%), with interquartile range (IQR) of 3.1

percentage points (%p). The median interquintile gaps in the prevalence of self-rated poor health was 11.1%p (95% CI, 8.1 to 14.5%p), with IQR of 3.6%p. Pro-rich inequalities in self-rated health were observed across all 245 districts of Korea. The correlation coefficients for the association between self-rated poor health and the associated income gaps, self-rated poor health and life expectancy, and income gaps associated with self-rated poor health and life expectancy were 0.59, 0.78 and 0.55 respectively.

**CONCLUSIONS:** Income gaps associated with self-rated poor health were evident across all districts in Korea. The magnitude of income gaps associated with self-rated poor health was larger in the districts with greater prevalence of self-rated poor health. A strong correlation between self-rated poor health and life expectancy was also observed.

**KEY WORDS:** Geography, Income, Self-rated health, Socioeconomic factors, Korea

## 서 론

자가평가 건강수준은 사망률의 예측변수로 잘 알려져 있다 [1]. 우리나라에서 시행된 연구에서도 자가평가 건강수준은 사망률을 예측하는 중요한 인자로 밝혀졌다 [2-4]. 또한 자가평가 건강수준은 주관적 건강상태를 반영하는 중요한 지표로도 활용되어 왔다 [5, 6]. 건강 불평등 측정에 있어 사망률과 같은 객관적 건강수준에서의 지표와 함께 자가평가 건강수준과 같은 주관적 건강수준에 있어서의 불평등을 파악하는 것도 중요한 과제라고 할 수 있다.

우리나라에서는 지난 10여 년 간 건강 형평성에 대한 관심이 커져 왔다 [7]. 지난 2005년 발간된 '새국민건강증진종합계획' 에서 처음으로 소득수준 간 건강 형평성 확보가 목표로 제시된 바 있고 [8], 뒤이어 발표된 제3차 국민건강증진종합계획에서는

지역 간 건강 형평성 목표가 추가되었다 [9]. 최근 수립된 제4차 국민건강증진종합계획에서는 소득 및 지역에 따른 건강 형평성 제고가 목표로 설정된 바 있다 [10]. 이처럼 소득 및 지역간 건강 불평등에 대한 인식이 증가하고, 문제 해결에 대한 요구는 커지고 있다. 그러나 건강 형평성 확보 정책은 중앙정부 차원의 개입 뿐 아니라 지방정부 차원의 문제 해결 노력이 함께 이루어 질 때 가장 효과적일 수 있다. 지방정부별로 건강 불평등 감소 정책을 추진하는 데 있어서 해당 지역의 건강수준의 사회경제적 격차에 대한 정보는 필수적이다. 사망신고자료와 지역사회건강조사 등의 분석을 통해 시군구 간 건강수준에서의 차이에 대한 정보는 제공되어 왔지만, 개별 시군구 내에서 건강 불평등의 현황(예를 들어 한 시군구 내에서의 소득수준에 따른 건강수준이나 건강행태의 차이)에 대한 정보는 충분하게 제공되지 않고 있다.

한편, 2015년 국민건강보험공단에 의해 수행된 연구를 통해 우리나라 시군구 수준에서 기대수명의 소득수준에 따른 불평등의 존재와 그 크기가 밝혀진 바 있다 [11]. 그러나 객관적 건강 상태 지표인 사망지표와 달리 주관적 건강 상태 지표인 자가평가 건강에 있어서는 시군구 수준에서의 소득수준에 따른 격차가 아직 보고되지 못했다. 그리고 두 지표들 간의 상관성 또한 아직까지 규명되지 않았다.

본 연구에서는 지역사회 건강조사 자료를 이용하여 시군구 수준에서 자가평가 불건강 유병률의 소득수준 간 격차를 규명하고, 그 결과를 기준에 보고된 기대수명의 소득수준 간 격차의 결과와 비교해보고자 한다.

## 재료 및 방법

### 분석 자료 및 단위

지역사회 건강조사는 2008 년부터 매년 각 시군구의 주민등록인구자료를 토대로 층화와 집락을 고려하여 추출된 만 19 세 이상 900 여명의 지역주민들을 대상으로 약 2.5 개월 동안 조사가 이루어진다. 설문조사는 조사원들이 직접 응답자의 가구를 방문하여 노트북에 설치된 전자조사표를 이용하여 이루어진다. 본 연구에서는 2008-2014 년도 지역사회건강조사 자료의 20 세 이상 응답자 총 1,578,990 명 중 자가평가 건강수준 문항이나 가구원 수 문항이 결측인 응답자 801 명(0.05%)을 제외한 1,578,189 명을 분석하였다. 본 연구에서는 우리나라의 2015 년도 기준 252 개 시군구를 2008 년도부터 2014 년도까지의 지방행정구역의 변화를 고려해 245 개 시군구로 다시 분류하였다. 첫째, 2014 년 충청북도 청주시와 청원군이 통합 청주시로 통합되며 상당구, 서원구, 흥덕구, 청원구 등의 행정구로 구성되었는데 본 연구에서는 청주시로 재분류하였다. 둘째, 충청남도 천안시의 경우, 2008 년 6 월 현재의 동남구와 서북구가 설치되었는데 대상자의 지역 정보가 천안시, 동남구 및 서북구 세 가지 범주로 관측됨에 따라 천안시로 통합하였다. 셋째, 전라북도 전주시 또한 실제 행정구역 상으로는 완산구와 덕진구로 이루어져 있지만 위와 같은 이유로 전주시로 통합하여 분석하였다. 넷째, 충청남도 연기군은 2012 년 7 월 세종특별자치시로 편입이 되었다. 따라서 본 연구에서도 세종특별자치시로 포함시켜 분석하였다. 다섯째, 경상남도 통합창원시는 2010 년 창원시, 마산시, 진해시가 통합되어 만들어졌다. 통합창원시는 현재 의창구,

성산구, 마산회원구, 마산합포구, 진해구로 나뉘었는데, 본 연구에서는 기존 행정구역을 감안하여 의창구와 성산구, 마산회원구와 마산합포구 그리고 진해구 세 지역으로 나누어 분석하였다. 도시화 정도는 대도시(Metropolitan area), 도시(Urban area), 농촌(Rural area)을 행정구역에 따라 각각 "구", "시", "군" 지역으로 설정하였다.

### 자가평가 불건강

자가평가 불건강은 "평소에 본인의 건강은 어떻다고 생각하십니까?"라는 질문에 "나쁨" 혹은 "매우 나쁨"이라고 대답한 사람들의 분율로 정의하였다. 이와 같이 정의한 이유는 선행 연구들에 의해서 자가평가 건강수준을 "매우 좋음", "좋음" 혹은 "보통"이라고 응답한 사람들의 사망에 대한 상대위험도가 비슷하였고, "나쁨" 혹은 "매우 나쁨"이라고 응답한 사람들에서 유의하게 증가하였기 때문이다 [2-4].

### 소득

2008 년도부터 2013 년도까지의 지역사회 건강조사는 연간 혹은 월간 가구소득을 연속형 변수로 파악하였다. 그러나 2014 년도부터는 월간 가구소득을 여덟 개의 범주 (50 만원 미만, 50-100 만원 미만, 100 만원-200 만원 미만, 200-300 만원 미만, 300-400 만원 미만, 400-500 만원 미만, 500-600 만원 미만, 600 만원 이상)로 파악하는 것으로

변경되었다. 이에 따라 본 연구에서는 각 범주의 중간값을 응답자의 월 가구소득으로 취해 연속형 변수로 변환한 뒤, 연간 가구소득을 산출하였다. 예를 들면, “100 만원-200 만원 미만”이라고 응답한 경우에는 월 가구소득을 150 만원으로 변환한 뒤, 연간 가구소득을 계산하였다. “600 만원 이상”으로 응답한 경우에는 650 만원으로 변환하였다. 2008 년도부터 2014 년도까지의 자료를 합산했으므로 각 연도에 따른 물가의 변동을 고려할 필요가 있었다. 본 연구에서는 2010 년도 기준 소비자물가지수를 이용하여 가구소득을 보정하였다. 예를 들면, 2008 년도의 가구소득은 2008 년도와 2010 년도 소비자물가지수의 비 100/94.52 를 곱했다. 따라서 모든 가구소득은 2010 년도의 물가를 기준으로 환산되었다. 2008 년도부터 2014 년도까지의 응답자 중 가구소득이 결측인 응답자는 110,579 명(7.0%)이었다. 시군구 수준에서 지역 대표성을 지닌 소득수준 간 건강 불평등 지표를 산출하기 위해, 결측인 소득정보는 대치(imputation)하였다. 대치는 소비자물가지수가 반영된 가구소득 정보를 가지고 있는 응답자들의 성별, 5 세별 연령군, 가족 구성원 수, 직업, 교육수준을 활용한 단순 대치(single imputation) 방식으로 이루어졌다. 본 연구에서는 가구원 수의 효과를 보정하기 위하여 ‘가구원수 보정 연간 가구소득’을 산출하였다. 이 때, 균등화지수는 OECD 연구에서 이용하는 방식을 따라 0.5 을 이용하였다 [12]. 계산식은 아래와 같다.

$$\text{가구원수 보정 연간 가구소득} = \frac{\text{연간 가구소득}}{\text{가구원수}^{0.5}}$$

245 개의 개별 시군구 내에서 자가평가 불건강 유병률의 소득 5 분위 간 격차 산출을 위해 각 연도별, 시군구별, 성별, 10 세 단위 연령구간별 소득 5 분위를 산출하였다. 소득 5 분위는 특정 연령대의 집단을 소득수준에 따라 서열화 한 뒤, 5 분위 분율(20%, 40%, 60%, 80%)에서 가장 가까운 지점(the nearest quintile points)에서 구분하여 개별 시군구 내에서의 상대적인 소득 순위를 가진 5 분위 집단을 산출하였다.

### 기대수명 분석 결과의 활용

이 연구에서는 기존에 이루어진 시군구별 소득수준에 따른 기대수명 산출결과를 이용하였다 [11]. 국민건강보험공단(2015)에 의해 수행된 기대수명의 산출은 국민건강보험 자격DB를 활용하여 이루어졌다. 국민건강보험 자격DB는 우리나라 건강보험 가입자 전체를 대상으로 구축되었다. 이 연구에서는 2009년도부터 2014년도까지 6년간의 자료를 통합하여 294,010,120명의 대상자 정보와 1,459,660명의 사망자 정보를 이용하여 분석이 이루어졌다. 이 연구에서는 2014년도 행정구역을 기준으로 252개 시군구별 분석이 이루어졌는데, 본 연구의 시군구 분석단위와 일치시키기 위해 일부 행정구역을 재분류해 기대수명의 재산출이 이루어졌다. 기대수명 산출은 연령별 사망률( ${}_n m_x$ )을 통해 산출한 연령별 사망확률( ${}_n q_x$ )을 토대로 연령별 사망자 수와 생존자 수( $l_x$ )를 구한 뒤, 연령별 정지 인구(x 연령에서 x+n 연령까지의 기간 동안 생존이 기대되는 생존 연 수의 합계,  ${}_n L_x$ )를 계산하였다. 계산식은 아래와 같다.

$${}_n q_x = \frac{{}_n m_x}{1 + \frac{1}{2} {}_n m_x},$$

$${}_nL_x = n \frac{(l_x + l_{n+x})}{2},$$

그 후, 특정 연령 이후의 정지인구를 모두 합해 총 정지인구( $T_x$ )를 계산한 뒤, 이를 생존자 수로 나누어 기대수명( $e_x$ )을 산출하였다. 계산식은 아래와 같다.

$$T_x = \sum_x {}_nL_x,$$

$$e_x = \frac{T_x}{l_x}$$

소득 자료는 국민건강보험 보험료를 이용하였다. 앞선 연구들에 의해 국민건강보험 보험료가 기대수명의 소득에 따른 차이 산출에 유용함이 밝혀진 바 있다 [13, 14]. 6 년간의 국민건강보험 자격 DB 를 통합하여 산출된 대상자들을 연도별, 성별, 시군구별, 5 세 단위 연령별로 소득 5 분위로 나누어, 생성된 각 그룹의 연도별 연앙 인구수와 사망자수를 토대로 성별, 시군구별로 소득수준과 5 세 단위 연령군에 따른 사망확률을 산출한 후 생명표를 작성하여 시군구별 소득수준에 따른 기대수명을 산출하였다. 기대수명의 소득수준 간 격차는 소득수준 상위 20%와 하위 20%의 차로 정의하였다.

## 분석 방법



지역사회 건강조사 자료의 가구원수 보정 연간 가구소득을 성별과 10 세별 연령군을 고려하여 지역별로 5 분위를 산출해 총 14,700 개의 세부 그룹으로 나뉘었다. 이 때, 자가평가건강을 “나쁨” 혹은 “매우 나쁨”이라고 보고한 응답자가 한 명도 없는 그룹이 남자에서 273 개(전체 남성에서 3.7%), 여자에서는 186 개 그룹(전체 여성에서 2.5%)으로 나타났다. 이 때, 연령표준화 자가평가 불건강 유병률이 과소추정 될 수 있기 때문에 각 그룹의 분자 수가 0 인 경우 0.01 로 치환했다. 가중치는 지역사회 건강조사 자료에서 제공하는 원 가중치를 이용하여 성별과 연도별로 각 시군구의 응답자 수와 가중치의 총합이 일치하도록 새로운 가중치를 산출하였다. 연령표준화 자가평가 불건강 유병률은 2010 년도 주민등록연앙인구를 표준 인구로 사용하여 산출하였다. 소득 5 분위 간 차이는 소득수준 상위 20%와 하위 20%의 절대적 차이를 이용해서 산출하였다. 그 이유는 유병률의 절대적 차이가 상대비에 비해서 일반인들이 직관적으로 이해하기 쉽다는 장점 때문이었다. 다음 식을 이용해 소득 5 분위 간 격차의 95% 신뢰구간을 산출하였다.

$$\text{Lower CI} = \text{Gap} - (1.96 \times \sqrt{\frac{P1(1 - P1)}{N1} + \frac{P2(1 - P2)}{N2}})$$

$$\text{Upper CI} = \text{Gap} + (1.96 \times \sqrt{\frac{P1(1 - P1)}{N1} + \frac{P2(1 - P2)}{N2}})$$

Lower CI= 95% 신뢰구간의 하한값, Upper CI= 95% 신뢰구간의 상한값

Gap=소득수준 상, 하위 20% 간 연령표준화 자가평가 불건강 유병률 격차

P1=소득수준 상위 20% 연령표준화 자가평가 불건강 유병률,

P2=소득수준 하위 20% 연령표준화 자가평가 불건강 유병률

N1=소득수준 상위 20% 인구수, N2=소득수준 하위 20% 인구수

연령표준화 자가평가 불건강 유병률과 소득수준 간 격차 및 기대수명 그리고 연령표준화 자가평가 불건강 유병률 소득수준 간 격차와 기대수명의 소득수준 간 격차와의 상관분석 및 선형 회귀분석을 수행하였다. 모든 분석은 SAS 9.4 를 이용하여 이루어졌다.

## 결 과

<Table 1>에서 볼 수 있듯이 본 연구에 사용된 지역사회 건강조사의 대상자는 총 1,578,189명이었다. 그 중 남자는 717,183명(45.4%), 여자는 861,006명(54.6%)이었다. 대도시 지역에 사는 응답자가 625,991명으로 가장 많았고, 농촌 지역이 511,699명, 도시 지역이 440,499명이었다. 모든 응답자의 평균 나이는 51.3세, 표준편차는 16.7세였다. 평균 나이는 성별에 따라 차이가 있었는데 남성이 50.4세, 여성이 52.0세로 나타났다. 표본가중치를 적용한 후에도 유사한 양상이 나타났다. 자신의 건강수준을 '나쁨' 혹은 '매우 나쁨'이라고 평가한 사람은 339,708명(조율 = 21.5%)이었는데 남자보다는 여자에서 조율값이 더 높았다. 가중치를 적용한 연령표준화 자가평가 불건강 유병률은 남녀 전체에서는 16.3% (95% CI: 16.3%-16.4%), 남성은 13.7% (95% CI: 13.6%-13.8%), 여성은

18.2% (95% CI: 18.1%-18.3%)로 나타났다.

<Table 2>에는 245개 시군구별 연령표준화 자가평가 불건강 유병률과 소득수준별 격차의 대표값(중앙값)과 분포 양상이 제시되어 있다. 남녀 전체의 연령표준화 자가평가 불건강 유병률의 중앙값은 15.7% (95% CI: 14.6%-16.8%)이었고, 최소값은 경기도 성남시 분당구의 8.1% (95% CI: 7.3%-8.8%), 최대값은 전라북도 고창군의 21.8% (95% CI: 20.7%-22.9%)이었다. 남성에서 중앙값은 13.2% (95% CI: 11.8%-14.5%), 최소값은 경기도 성남시 분당구의 6.2% (95% CI: 5.2%-7.2%), 최대값은 강원도 태백시의 18.7% (95% CI: 17.2%-20.2%)이었다. 여성에서는 중앙값이 17.4% (95% CI: 15.8%-18.9%), 최소값은 경기도 성남시 분당구의 9.6% (95% CI: 8.5%-10.6%), 최대값은 전라북도 고창군의 24.4% (95% CI: 22.9%-26.0%)이었다. 남녀 전체 소득수준 상위 20%와 하위 20% 간 연령표준화 자가평가 불건강 유병률의 격차의 중앙값은 11.1%p (95% CI: 8.1%p-14.5%p)이었고 최소값은 경기도 용인시 수지구의 2.8%p (95% CI: -0.1%p-5.5%p), 최대값은 전라남도 고흥군의 20.1%p (95% CI: 18.0%p-24.0%p)로 나타났다. 남성 연령표준화 자가평가 불건강 유병률 격차의 중앙값은 11.2%p (95% CI: 7.0%p-15.4%p)이었고 최소값은 경기도 수원시 영통구와 경기도 성남시 분당구의 2.7%p (95% CI: -1.1%p-6.5%p), 최대값은 전라남도 고흥군의 23.5%p (18.9%p-28.1%p)이었다. 여성의 경우, 연령표준화 자가평가 불건강 유병률 격차의 중앙값은 10.4%p (95% CI: 5.9%p-14.5%p)로 나타났고, 최소값은 경기도 용인시 수지구의 1.5%p (95% CI: -2.2%p-5.2%p), 최대값은 부산광역시 해운대구의 19.2%p (95% CI: 14.8%p-23.6%p)가 기록했다. 소득수준 하위 20%와 상위 20% 간 연령표준화 자가평가 불건강 유병률의 격차는 성별에 상관없이 245개 전체 시군구

지역에서 0%p보다 컸다. 95% 신뢰구간을 고려하더라도 245개 시군구 중 남녀 전체에서는 244개 지역(99.6%), 남성에서는 242개 지역(98.8%), 여성은 239개 지역(97.6%)에서 소득수준 하위 20%의 자가평가 불건강 유병률이 상위 20%보다 통계적으로 유의하게 높은 것으로 나타났다.

<Appendix 1>은 우리나라 245개 시군구에서 자가평가 불건강 유병률과 이의 소득계층간 불평등 크기를 남녀별로 제시한 그림이다. 전반적으로 남성보다 여성에서의 자가평가 불건강 유병률이 높은 양상을 나타냈다. 하지만 자가평가 불건강 유병률의 소득5분위간 격차의 크기는 남녀별로 큰 차이를 보이지는 않았다.

<Figure 1>은 245개 시군구의 연령표준화 자가평가 불건강 유병률의 순위에 따라 최하위 소득군과 최상위 소득군의 연령표준화 자가평가 불건강 유병률과 회귀직선을 보여주고 있다. 그림에서 볼 수 있듯이 연령표준화 자가평가 불건강 유병률이 높아질수록 최하위 및 최상위 소득군의 연령표준화 자가평가 불건강 유병률 또한 높아지는 양상을 관찰할 수 있었다. 최하위 소득군의 회귀선 기울기는 최상위 소득군에 비해서 컸다. 지역의 자가평가 불평등 유병률과 소득수준의 교호작용은 통계적으로 유의하여 ( $P < 0.001$ ), 자가평가 불평등 유병률이 커질수록 최상위 및 최하위 소득군 간 유병률 격차의 크기는 커지는 양상이 나타났다.

<Appendix 2>과 <Appendix 3>에는 연령표준화 자가평가 불건강 유병률과 그것의 소득수준 간 격차가 가장 높거나 낮은 10개 지역들이 제시되어 있다. 남녀 전체 연령표준화 자가평가 불건강 유병률은 전라북도 고창군, 경상남도 남해군 등의 지역에서 높았고 경기도 성남시 분당구, 서울특별시 서초구 등의 지역에서 낮았다. 남자에서는

강원도 태백시, 경상남도 남해군 등에서 자가평가 불건강 유병률이 높았고 경기도 성남시 분당구, 서울특별시 서초구에서 낮았다. 여자 연령표준화 자가평가 불건강 유병률은 전라북도 고창군, 경상남도 남해군 등의 지역들에서 높은 것으로 나타났고, 경기도 성남시 분당구, 서울특별시 서초구 등에서 낮았다. 남녀 전체 연령표준화 자가평가 불건강 유병률의 소득수준 간 격차가 큰 지역들은 전라남도 고흥군, 부산광역시 해운대구 등으로 나타났고, 작은 지역들은 경기도 용인시 수지구, 경기도 성남시 분당구 등이었다. 남자에서는 전라남도 고흥군, 전라남도 완도군 등에서 컸고, 경기도 수원시 영통구, 경기도 성남시 분당구 등의 지역들에서 작은 것으로 나타났다. 여자의 경우, 부산광역시 해운대구, 전라남도 고흥군에서 연령표준화 자가평가 불건강 유병률 격차가 컸고 경기도 용인시 수지구, 경상북도 청도군 등의 지역들에서 그 격차가 작았다. <Appendix 4>에는 245개 전체 시군구 지역의 연령표준화 자가평가 불건강 유병률과 그 격차가 제시되어 있다.

우리나라 시군구별 남녀 전체 연령표준화 자가평가 불건강 유병률과 그것의 소득수준 간 격차를 지도로 표현한 것이 <Figure 2-A, B>에 나타나 있다. 연령표준화 자가평가 불건강 유병률은 경상남도와 경상북도 및 강원도의 일부 지역들과 전라남도과 전라북도 일부 지역 등에서 높은 양상을 보였다. 서울특별시의 경우, 전국의 자가평가 불건강 유병률 수준과 비교했을 때 모든 시군구에서 낮은 경향을 보였지만 강남과 강북 지역 간 뚜렷한 격차를 보였다. 부산광역시에서는 동구, 기장군, 사상구 등의 지역들에서 유병률이 높았고 금정구, 동래구, 수영구 등의 지역들에서는 낮은 것으로 나타나 동부와 서부 지역 간 유병률 격차가 나타났다. 연령표준화 자가평가 불건강 유병률 격차에서는

강원도, 경상북도 및 전라남도과 전라북도 지역이 큰 격차를 의미하는 붉은색으로 나타났다. 서울특별시의 경우, 노원구, 중구 및 종로구에서 연령표준화 자가평가 불건강 유병률 격차가 컸고 송파구, 서초구, 성동구에서는 그 격차가 작았다. 부산광역시에서는 해운대구, 영도구, 서구 등에서 큰 격차가 관찰되었고 사상구, 강서구, 수영구 등에서는 격차가 작았다.

<Figure 3-A, B, C>에는 245개 시군구별 남녀 전체 연령표준화 자가평가 불건강 유병률과 소득수준 간 격차(A), 기대수명과 연령표준화 자가평가 불건강 유병률 소득수준 간 격차(B), 그리고 기대수명의 소득수준 간 격차와 연령표준화 자가평가 불건강 유병률의 소득수준 간 격차(C)의 상관관계와 회귀계수가 나타나 있다. 기대수명에서도 우리나라 모든 시군구 지역에서 소득수준간 격차가 존재하는 것으로 나타났다(Figure 3-C 참조). 연령표준화 자가평가 불건강 유병률 및 소득수준 간 격차에서는 연령표준화 자가평가 불건강 유병률이 높을수록 소득수준 간 격차 또한 큰 양상을 보였고, 상관계수( $r$  값)는 0.59이었다. 회귀계수는 0.70이었다. 연령표준화 자가평가 불건강 유병률과 기대수명의 관계에서는 유병률이 높은 지역일수록 기대수명은 낮아지는 양상이 나타났다. 상관계수의 크기는 0.78로 상대적으로 컸고 회귀계수는 -0.37으로 나타났다. 또한 연령표준화 자가평가 불건강 유병률 소득수준 간 격차가 큰 지역일수록 기대수명의 소득수준 간 격차 또한 큰 양상을 보였는데 상관계수는 0.55, 회귀계수는 0.35였다. 모든 분석에서  $P$ 값은 0.001 미만이었다.

## 고 찰

본 연구는 우리나라의 245개 시군구별 자가평가 불건강 유병률의 소득수준 간 격차를 산출하고, 이를 기준에 보고된 기대수명의 소득수준 간 격차와의 상관성을 밝히는 것을 목적으로 하였다. 연구 결과, 우리나라 모든 시군구에서 연령표준화 자가평가 불건강 유병률의 소득수준 간 격차가 뚜렷하게 나타났다. 연령표준화 자가평가 불건강 유병률의 소득수준 간 격차가 역전되는 지역은 존재하지 않았다. 95% 신뢰구간을 고려할 경우에도 남녀 전체 244개 지역(99.6%)에서 소득 하위 20% 집단이 상위 20% 집단보다 유의하게 높은 자가평가 불건강 유병률을 보였다. 이와 같은 양상은 우리나라에서 자가평가 불건강 유병률에서의 불평등이 매우 명료하다는 점을 의미한다. 기대수명에서의 소득수준간 격차의 경우에도 모든 시군구에서 높은 소득군에 유리한 불평등이 존재하였으므로, 우리나라 245개 전체 시군구 내에서 객관적, 주관적 건강지표(기대수명과 주관적 건강수준) 모두 불평등이 존재한다고 볼 수 있다. 자가평가 불건강 유병률의 소득수준 간 격차가 큰 지역들은 자가평가 불건강 유병률 또한 높은 양상을 보였는데, 이는 도시보다는 농촌이 그러하였다. 자가평가 불건강 유병률과 기대수명, 자가평가 불건강 유병률 소득수준 간 격차와 기대수명의 소득수준 간 격차는 높은 상관성을 나타냈다.

연구 결과에 따르면, 여성의 연령표준화 자가평가 불건강 유병률이 남성의 유병률보다 낮은 지역은 한 군데도 없었다. 이는 자가평가 건강수준의 측정에서 성별에 따른 차이가 존재함을 보고한 선행 연구의 결과와 같다 [15]. 성별에 따른 자가평가 불건강 유

병률의 차이는 완전히 해명되지는 않았지만, 고통의 경험에 대한 차이가 하나의 설명 방법이 될 수 있다. 여성들은 고통에 대한 감수성이 남성들보다 더 크고, 고통에 대한 내성(tolerance)은 더 작은 것으로 알려져 있다 [16, 17]. 예를 들어, 여성은 남성보다 근골격계 질환에 따른 고통의 경험에 더 취약하다 [16, 18].

성별 자가평가 건강수준 보고의 차이에도 불구하고 본 연구에서는 연령표준화 자가평가 불건강 유병률의 소득수준 간 격차가 소득수준에 따른 역전 현상 없이 남녀 모두 저소득층에 불리한 불평등이 모든 시군구에서 나타났다. 이는 국가 혹은 광역시도 수준에서 시행한 선행 연구들의 결과와도 부합한다. Mackenbach 등(2004)에 의해 유럽의 7개 국가를 대상으로 시행된 연구에 의하면 소득이 높은 집단은 낮은 집단보다 자가평가 불건강 유병률이 낮았고 [19], Hildebrand와 Van Kerm (2009)에 의해 유럽의 11개 국가에서 이루어진 연구에서도 남녀 모두 소득에 따른 자가평가 불건강 유병률의 불평등을 발견할 수 있었다 [20]. 국내에서는 1989년도부터 1999년도까지 사회통계조사를 분석한 바에 따르면 교육수준에 따른 자가평가 건강수준 불평등이 10년 간 심화되었음이 밝혀진 바 있으며 [21], 김혜련(2005)이 서울 지역을 대상으로 시행한 연구에서도 남녀 모두 교육수준, 소득, 직업 등의 사회경제적 위치에 따른 자가평가 건강수준의 불평등이 보고된 바 있다 [22]. 1998년도와 2001년도 국민건강영양조사 자료를 합산하여 분석한 연구에서 자가평가 건강수준은 경제활동 상태, 가구소득수준과 깊은 관련성을 보였다 [4]. 2005년도 국민건강영양조사 자료를 이용한 연구에서도 성별에 상관없이 사회계층, 교육수준, 소득수



준에 따른 자가평가 불건강 유병률의 불평등이 관찰되었다 [23].

이 연구에서는 도시보다 농촌에서 연령표준화 자가평가 불건강 유병률이 더 높고 소득수준 간 격차는 큰 것으로 나타났다. 또한 수도권과 비수도권, 서울의 강남과 강북 지역에서도 자가평가 불건강 유병률의 격차와 함께 소득수준 간 격차의 차이 또한 관찰되었다. 이와 같은 현상이 나타난 이유는 <Figure 1>에서 볼 수 있듯이, 자가평가 불건강 유병률의 증가에 따라 소득 상위 20% 유병률의 상승폭은 크지 않았던 반면, 소득 하위 20%의 유병률 상승폭은 상대적으로 컸기 때문이다. 자가평가 불건강 유병률이 높은 지역(농촌 지역, 서울의 강북 지역)은 상대적으로 사회경제적 수준이 낮은 지역으로, 해당 지역에서의 소득 하위 20%의 절대 소득수준은 자가평가 불건강 유병률이 낮은 지역(도시 지역, 서울시에서 강남지역)의 소득 하위 20%의 절대 소득수준보다 낮다. 소득 상위 20%의 절대 소득수준 또한 자가평가 불건강 유병률이 낮은 지역에서 더 높았지만 소득 하위 20%에 비해서 지역 간 상대적 격차가 작았고, 가구원 수 보정 연간 가구소득액이 농촌 지역에서도 소득수준을 고려하지 않았을 때의 전체 평균액보다 큰 것으로 나타났다. 이는 <Appendix 5>에서 확인할 수 있다. 소득이 낮을수록 자가평가 불건강 유병률이 높은 점을 고려하면 자가평가 불건강 유병률이 높아짐에 따라 소득 하위 20% 유병률의 상승폭이 상위 20% 유병률의 상승폭보다 더 컸던 것은 구성적 효과(compositional effect)가 일부 원인으로 작용했기 때문이라고 할 수 있다. 건강행태에서도 자가평가 불건강 유병률이 높은 지역의 최하위 소득군 흡연율은 자가평가 불건강 유병률이 낮은 지역의 최하위 소득군에 비해서 더 높은 흡연율을 보였다 [24]. 이러한 차이에는 구성적 효과 뿐만 아니라 사회경제적 지표가 좋지 않은 지역들에서 담배 구매가 더 용이하게

나 [25] 실내 금연 정책의 시행이 늦게 이루어지는 등 [26] 흡연 행태에 영향을 미치는 맥락 효과(contextual effect)가 해당 지역에 작용하기 때문으로 여겨진다. 사회경제적으로 취약한 지역의 저소득계층에서 보이는 높은 자가평가 불건강 유병률에는 주거 환경 [27], 도심 내 휴식시설 [28] 및 보건의료 서비스 접근성 [29] 등의 맥락적 요인도 기여할 것으로 생각된다. 이처럼 구성적 및 맥락적 요인들은 동시에 작용하며, 자가평가 불건강 유병률이 높은 농촌지역이나 강북 지역에 거주하는 낮은 소득계층의 주관적 건강수준에 영향을 미쳤을 것으로 생각된다.

연구 결과에 따르면, 우리나라 시군구 수준에서 연령표준화 자가평가 불건강 유병률과 그 격차의 크기는 상관성을 보였다. 2015년 국민건강보험공단에 의해 이루어진 연구에서 기대수명과 기대수명의 소득수준 간 격차가 높은 상관성을 보인 결과와 유사한 양상이라고 할 수 있다. 우리나라 시군구 수준에서 기대수명과 자가평가 불건강 유병 지표 모두 불평등의 크기가 작은 지역일수록 기대수명과 자가평가 불건강 유병률 또한 낮게 나타남을 알 수 있다. 또한 이 연구에서는 연령표준화 자가평가 불건강 유병률과 기대수명, 그리고 자가평가 불건강 유병률과 기대수명의 소득수준 간 격차가 높은 상관성을 나타냈다. 즉, 우리나라 시군구 수준에서 자가평가 불건강 유병률이 높은 지역일수록 사망률 또한 높고 유병률의 불평등 크기가 큰 지역일수록 사망률에 있어서의 불평등의 크기 또한 큰 경향을 보였다. 이들 결과는 지역 단위에서 건강 불평등의 감소를 통하여 지역 전체의 객관적, 주관적 건강수준이 함께 향상될 가능성이 존재한다는 점을 알려준다.

이 연구는 다음과 같은 제한점을 지닌다. 2008년도부터 2013년도까지 연속형 변수로 측정되던 지역사회 건강조사의 가구소득 측정이 2014년도부터 월 가구소득을 범주형으로 측정하는 것으로 바뀌었다. 이에 따라 가구소득의 정확한 측정에 제한이 있을 수 있다. 특히 600만원 이상의 월 가구소득을 가진 사람들은 "650만원 이상"이라는 단일한 범주로 분류되기 때문에 상위 소득군의 산출에 주의를 기울여야 했다. 그러나 본 연구에서는 성별과 연령을 고려하여 지역별로 소득 5분위를 나눠 각 연도별로 14,700개의 그룹을 나누는 분석 방법을 적용했는데 2014년도 지역사회 건강조사 자료에서 월 가구소득을 '600만원 이상'이라고 응답한 사람의 비율이 20%가 넘는 그룹은 290개 그룹으로 전체의 2.0%를 차지했고 이 290개 그룹에 속한 응답자들의 수는 6,025명으로 2014년도 지역사회 건강조사 응답자 228,712명의 2.6%에 불과하였다. 또한 2014년도 자료를 제외하여 분석하였을 경우에도 전반적인 양상은 비슷하게 나타났다. 하지만 본 연구에 사용한 기대수명 자료가 2014년도까지를 포함하고 있고, 가능한 시군구 단위에서 많은 표본수를 사용하는 것이 보다 안정적인 소득5분위별 유병률을 산출할 수 있기 때문에, 최종 분석에는 2014년도 자료를 포함하였다. 또한 본 연구에서는 유병률의 절대 차이값에 초점을 두고 기술하였기 때문에, 유병률 비라는 상대 지표를 별도로 제시하지는 않았다. 상대지표는 <Appendix Table 3>을 이용하여 계산이 가능하다.

본 연구는 우리나라의 245개 모든 시군구에 존재하는 자가평가 불건강 유병률의 소득수준 간 격차의 크기를 밝혔다. 또한 자가평가 불건강 유병률의 격차와 시군구별 기대수명의 소득수준 간 격차는 높은 상관성을 보였다. 즉, 주관적 건강 상태 지표와 객관적 건강 상태 지표 모두에서 우리나라의 시군구 지역 내에 건강 불평등이 존재한다는 점

을 제시하였다는 점에서 이 연구의 의의를 찾을 수 있다. 자가평가 불건강 유병률의 소득수준 간 격차는 향후 개별 시군구 내 건강 형평성 현황에 관해서 유의미한 정보를 제공하고 이를 지역별 보건정책 수립의 근거로 활용할 수 있을 것으로 보인다. 앞으로는 지역과 사회경제적 위치에 따른 자가평가 건강 불평등의 크기 변이의 원인에 대해서 규명하는 연구가 필요할 것이다.

## References

1. Idler EL, Benyamini Y. Self-rated health and mortality: a review of twenty-seven community studies. *J Health Soc Behav* 1997;38:21-37.
2. Jee SH, Ohrr HC, Kim IS. Self-rated health and mortality in elderly: Kangwha cohort, 8-year follow up. *Korean J Epidemiol* 1994 (Korean);16:172-180.
3. Khang YH, Kim HR. Gender differences in self-rated health and mortality association: role of pain-inducing musculoskeletal disorders. *J Womens Health (Larchmt)* 2010;19:109-116.
4. Khang YH, Kim HR. Self-rated health and mortality: gender- and age-specific contributions of explanatory factors in South Korea. *Int J Public Health* 2010;55:279-289.
5. Kaplan GA, Goldberg DE, Everson SA, Cohen RD, Salonen R, Tuomilehto J, et al. Perceived health status and morbidity and mortality: evidence from the Kuopio ischaemic heart disease risk factor study. *Int J Epidemiol* 1996;25:259-265.
6. Wu S, Wang R, Zhao Y, Ma X, Wu M, Yan X, et al. The relationship between self-rated health and objective health status: a population-based study. *BMC Public Health* 2013;13
7. Khang YH, Lee SI. Health inequalities policy in Korea: current status and future challenges. *J Korean Med Sci* 2012;27 Suppl:S33-40.
8. Ministry of Health and Welfare. Health Plan 2010. Seoul: Ministry of Health and Welfare; 2005 (Korean) p. 211
9. Ministry of Health and Welfare. Health Plan 2020. Seoul: Ministry of Health and Welfare; 2011 (Korean) p. 96
10. Ministry of Health and Welfare. Health Plan 2020. Seoul: Ministry of Health and Welfare; 2015 (Korean) p. 36
11. Khang YH, Bahk J, Kang H, Park JH. Income differences in life expectancy at birth in provinces and local districts in South Korea: Findings from National Health Insurance Data, 2009-2014. Seoul: National Health Insurance Service; 2015. (Korean).
12. Khang YH, Yun SC, Cho HJ, Jung-Choi K. The impact of governmental antismoking policy on socioeconomic disparities in cigarette smoking in South Korea. *Nicotine Tob Res* 2009;11:262-269.
13. Khang YH, Bahk J, Yi N, Yun SC. Age- and cause-specific contributions to income difference in life expectancy at birth: findings from nationally representative data on one million South Koreans. *Eur J Public Health* 2016;26:242-248.
14. Khang YH, Yang S, Cho HJ, Jung-Choi K, Yun SC. Decomposition of socio-economic differences

in life expectancy at birth by age and cause of death among 4 million South Korean public servants and their dependents. *Int J Epidemiol* 2010;39:1656-1666.

15. Benyamini Y, Leventhal EA, Leventhal H. Gender differences in processing information for making self-assessments of health. *Psychosom Med* 2000;62:354-364.

16. Unruh AM. Gender variations in clinical pain experience. *Pain* 1996;65:123-167.

17. Keogh E. Sex Differences in Pain. *Rev Pain* 2008;2:4-7.

18. Rollman GB, Lautenbacher S. Sex differences in musculoskeletal pain. *Clin J Pain* 2001;17:20-24.

19. Mackenbach JP, Martikainen P, Looman CW, Dalstra JA, Kunst AE, Lahelma E, et al. The shape of the relationship between income and self-assessed health: an international study. *Int J Epidemiol* 2005;34:286-293.

20. Hildebrand V, Van Kerm P. Income inequality and self-rated health status: evidence from the European Community Household Panel. *Demography* 2009;46:805-825.

21. Khang YH, Lynch JW, Yun S, Lee SI. Trends in socioeconomic health inequalities in Korea: use of mortality and morbidity measures. *J Epidemiol Community Health* 2004;58:308-314.

22. Kim HR. The relationship of socioeconomic position and health behaviors with morbidity in Seoul, Korea. *Health and Social Welfare Review* 2005;25:3-35 (Korean).

23. Kim M, Chung W, Lim S, Yoon S, Lee J, Kim E, et al. [Socioeconomic inequity in self-rated health status and contribution of health behavioral factors in Korea]. *J Prev Med Public Health* 2010;43:50-61.

24. Kim I, Bahk J, Yoon T-H, Khang YH. Income differences in smoking prevalences in 245 districts of South Korea: Patterns by area deprivation and urbanity, 2008-2014. *Korean J Prev Med* 2017;0

25. Rodriguez D, Carlos HA, Adachi-Mejia AM, Berke EM, Sargent JD. Predictors of tobacco outlet density nationwide: a geographic analysis. *Tob Control* 2013;22:349-355.

26. National health promotion act. Article 9. 2014. Available from: <http://www.law.go.kr/lsInfoP.do?lsiSeq=181391&efYd=20160903#0000>.

27. Oh S. Disparities of residential well-being for urban and rural autonomies: Application of homeownership and minimum standard (dissertation). Seoul: Seoul National University 2002 (Korean)

28. Lee KH, Seo JS. A Study on the Regional Disparity between the Major 3 Gangnam Districts and the Major 3 Gangbuk Districts in Seoul. *Korean Public Management Review* 2009;23:357-381 (Korean).

29. Cho HJ. Equity in health care: current situation in South Korea. *J Korean Med Assoc* 2013;56:184-194.

Volume: 39, Article ID: e2017011,

<https://doi.org/10.4178/epih.e2017011>

**Table 1.** Characteristics of study subjects in 245 districts of South Korea: Data from the Community Health Survey, 2008-2014

|                                                                                                 | Total               | Men                 | Women               |
|-------------------------------------------------------------------------------------------------|---------------------|---------------------|---------------------|
| No. of study subjects (%)                                                                       | 1,578,189 (100.0)   | 717,183 (45.4)      | 861,006 (54.6)      |
| Residential area (%)                                                                            |                     |                     |                     |
| Metropolitan                                                                                    | 625,991 (100.0)     | 284,892 (45.5)      | 341,099 (54.5)      |
| Urban                                                                                           | 440,499 (100.0)     | 202,102 (45.9)      | 238,397 (54.1)      |
| Rural                                                                                           | 511,699 (100.0)     | 230,189 (45.0)      | 281,510 (55.0)      |
| Mean age (SD)                                                                                   | 51.3 (16.7)         | 50.4 (16.1)         | 52.0 (17.1)         |
| Weighted mean age (SD)                                                                          | 48.2 (18.7)         | 46.6 (17.8)         | 49.5 (19.1)         |
| Mean equivalized household income (SD) (10,000 won)                                             | 1808.1 (1910.5)     | 1892.9 (1975.0)     | 1737.6 (1852.1)     |
| Quintile I (Lowest)                                                                             | 657.8 (403.1)       | 690.6 (407.6)       | 630.5 (397.3)       |
| Quintile II                                                                                     | 1134.0 (524.9)      | 1203.1 (508.1)      | 1076.8 (531.6)      |
| Quintile III                                                                                    | 1546.9 (641.1)      | 1626.2 (618.7)      | 1480.3 (651.8)      |
| Quintile IV                                                                                     | 2093.5 (786.6)      | 2193.7 (759.5)      | 2009.8 (799.1)      |
| Quintile V (Highest)                                                                            | 3622.2 (3443.0)     | 3766.8 (3589.3)     | 3502.3 (3312.1)     |
| No. of subjects with self-rated poor health<br>(crude prevalences of self-rated poor health, %) | 339,708<br>(21.5)   | 122,060<br>(17.0)   | 217,648<br>(25.3)   |
| Age-standardized prevalences of self-rated poor health <sup>1</sup> (%) (95% CI)                | 16.3<br>(16.3-16.4) | 13.7<br>(13.6-13.8) | 18.2<br>(18.1-18.3) |

CI, confidence interval; SD, standard deviation.

<sup>1</sup>Age-standardized prevalences of self-rated poor health were estimated with standard population being 2010 mid-year resident population, after taking into account sample weights of the Community Health Survey.



**Table 2.** Overall age-standardized prevalences of self-rated poor health, self-rated poor health prevalences by income quintiles, and interquintile income gaps in the prevalences of self-rated poor health stratified by gender among 245 local districts of South Korea: Findings from the Community Health Survey , 2008-2014

| Variable            | Total  |       |       |        |       | Men    |       |       |        |       | Women  |       |       |        |       |
|---------------------|--------|-------|-------|--------|-------|--------|-------|-------|--------|-------|--------|-------|-------|--------|-------|
|                     | Median | SD    | Min   | Max    | IQR   | Median | SD    | Min   | Max    | IQR   | Median | SD    | Min   | Max    | IQR   |
| Overall             | 15.7%  | 2.3%  | 8.1%  | 21.8%  | 3.1%p | 13.2%  | 2.2%  | 6.2%  | 18.7%  | 3.2%p | 17.4%  | 2.4%  | 9.6%  | 24.4%  | 3.0%p |
| Income Q1 (lowest)  | 22.8%  | 3.6%  | 11.0% | 31.2%  | 4.6%p | 21.1%  | 4.1%  | 9.1%  | 31.0%  | 5.4%p | 23.9%  | 3.7%  | 12.6% | 34.2%  | 4.3%p |
| Income Q2           | 16.6%  | 2.6%  | 8.2%  | 24.2%  | 3.1%p | 13.7%  | 2.8%  | 5.1%  | 21.6%  | 3.5%p | 18.5%  | 2.8%  | 10.5% | 27.7%  | 3.3%p |
| Income Q3           | 14.5%  | 2.3%  | 6.7%  | 22.2%  | 3.1%p | 11.7%  | 2.2%  | 6.4%  | 19.3%  | 3.1%p | 16.4%  | 2.7%  | 6.9%  | 27.3%  | 3.6%p |
| Income Q4           | 12.9%  | 2.0%  | 7.1%  | 20.8%  | 2.7%p | 10.1%  | 1.9%  | 5.1%  | 16.2%  | 2.5%p | 14.9%  | 2.5%  | 8.4%  | 23.8%  | 3.2%p |
| Income Q5 (highest) | 11.7%  | 2.0%  | 6.7%  | 17.2%  | 2.7%p | 9.4%   | 1.9%  | 4.0%  | 14.7%  | 2.6%p | 13.4%  | 2.3%  | 7.4%  | 20.7%  | 2.7%p |
| Q1-Q5               | 11.1%p | 2.7%p | 2.8%p | 20.1%p | 3.6%p | 11.2%p | 3.4%p | 2.7%p | 23.5%p | 4.3%p | 10.4%p | 3.0%p | 1.5%p | 19.2%p | 4.3%p |

SD, standard deviation; Min, minimum; Max, maximum; IQR, interquartile range

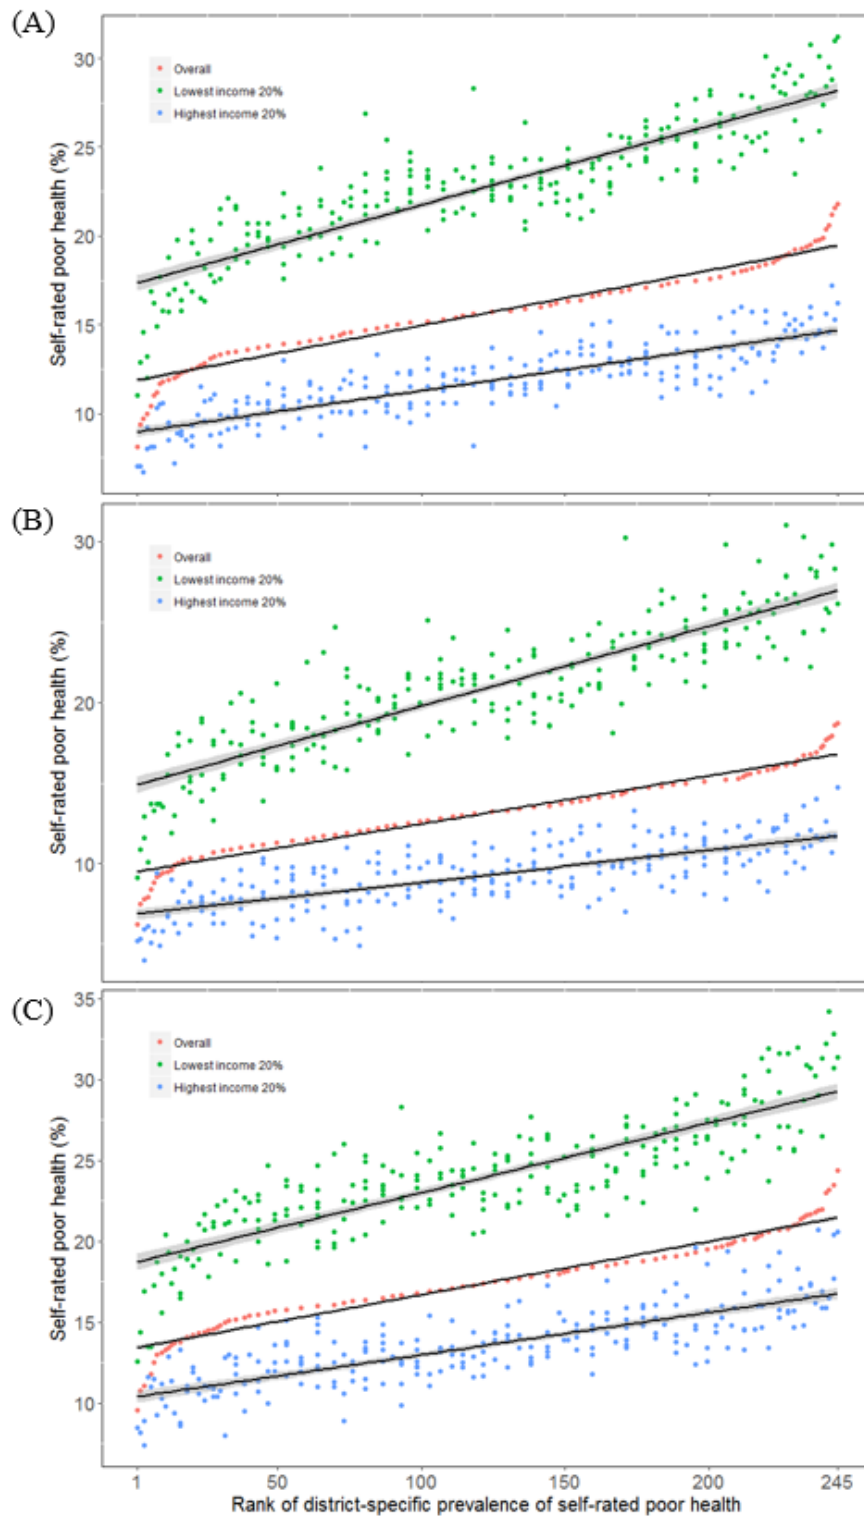

**Figure 1.** Scatter plots and regression lines of age-standardized prevalence of self-rated poor health in overall, the lowest [Q5] and the highest [Q1] income quintiles on the rank of district-specific

Volume: 39, Article ID: e2017011,

<https://doi.org/10.4178/epih.e2017011>

prevalence of self-rated poor health in (A) total, (B) men, and (C) women: Findings from the Community Health Survey, 2008-2014

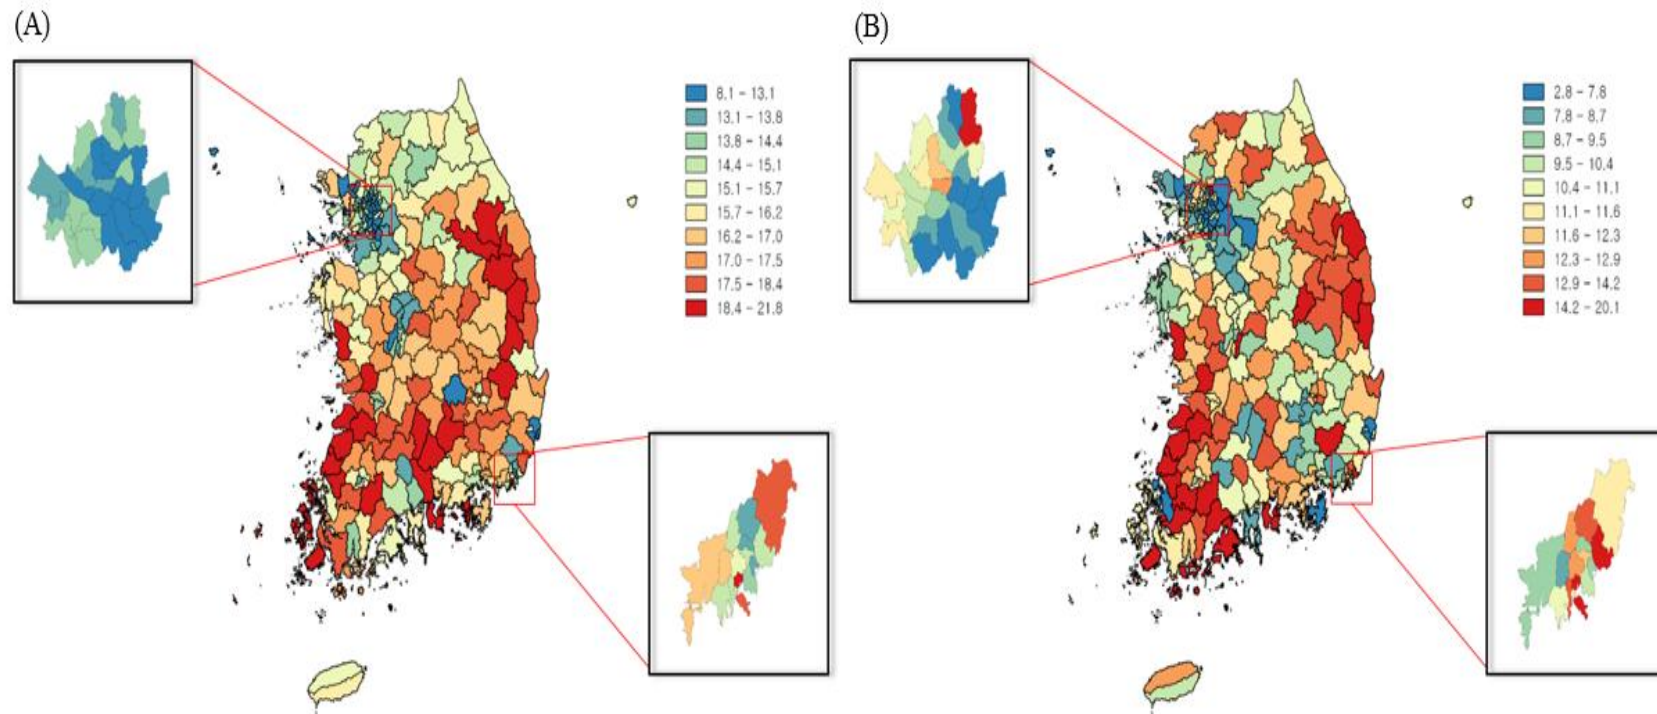

**Figure 2.** Choropleth maps for (A) the age-standardized prevalences of self-rated poor health and (B) the interquintile income gaps in self-rated poor health in Korea (both genders combined): Findings from the Korea Community Health Survey in Korea, 2008-2014.

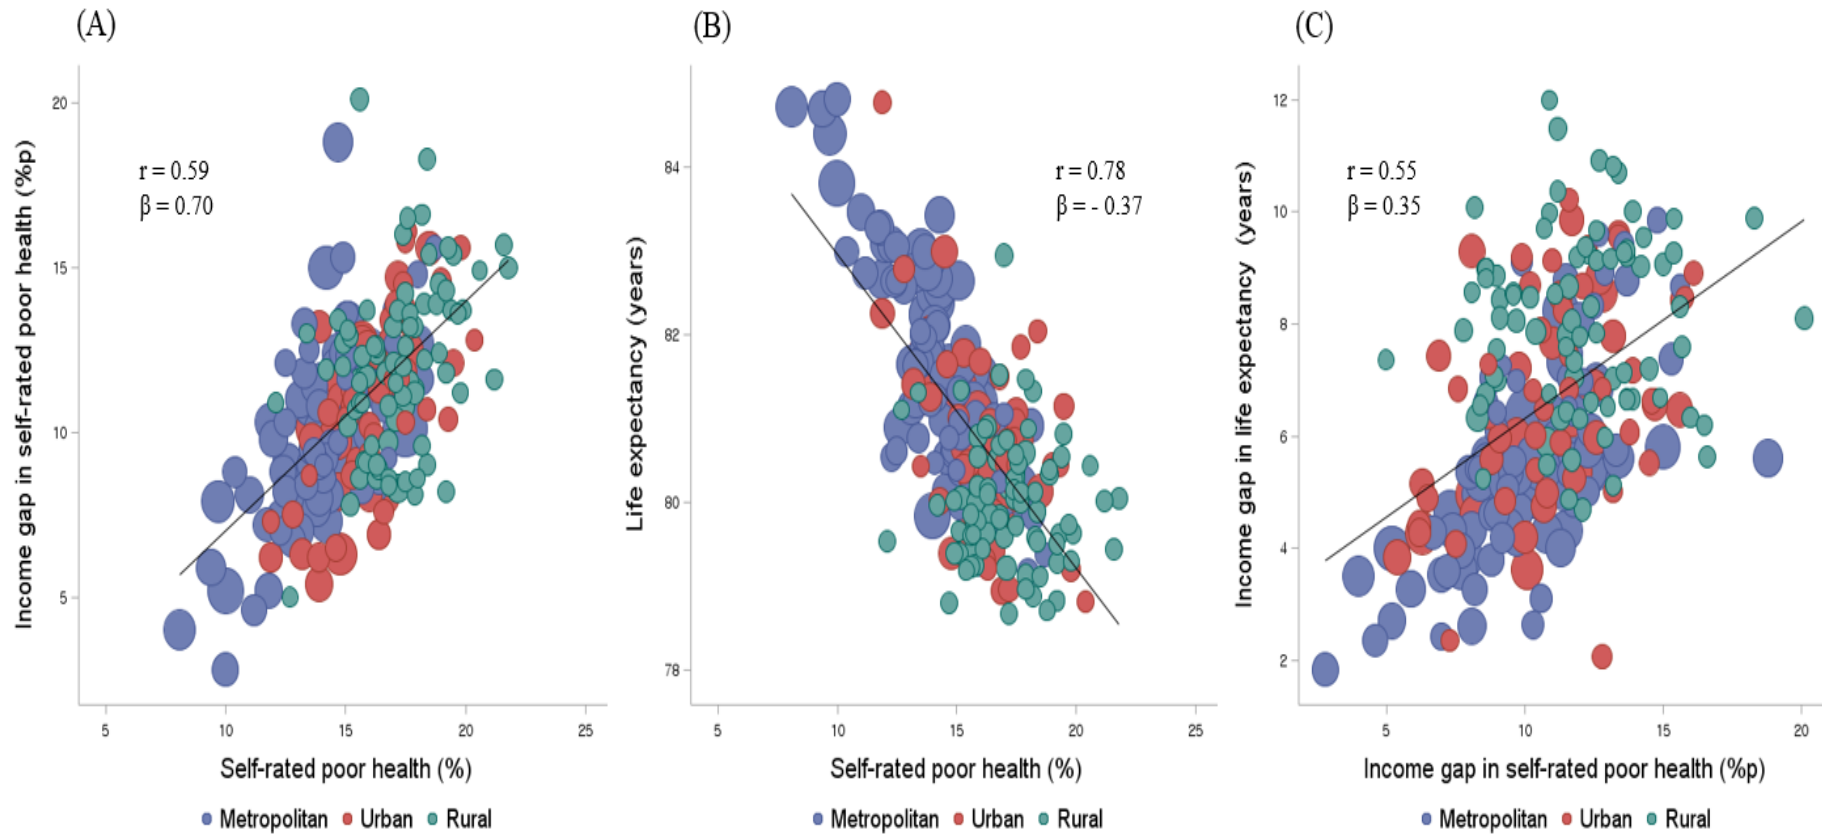

**Figure 3.** Scatter plots for correlations of age-standardized prevalences of self-rated poor health with (A) interquintile income gaps of self-rated poor health prevalence and (B) life expectancy and of (C) interquintile income gaps in self-rated poor health with life expectancy gap by income in the 245 local

Volume: 39, Article ID: e2017011,

<https://doi.org/10.4178/epih.e2017011>

districts of South Korea (both sexes combined): Findings from the Community Health Survey in Korea, 2008-2014, and analysis results on life expectancy from the National Health Insurance Service

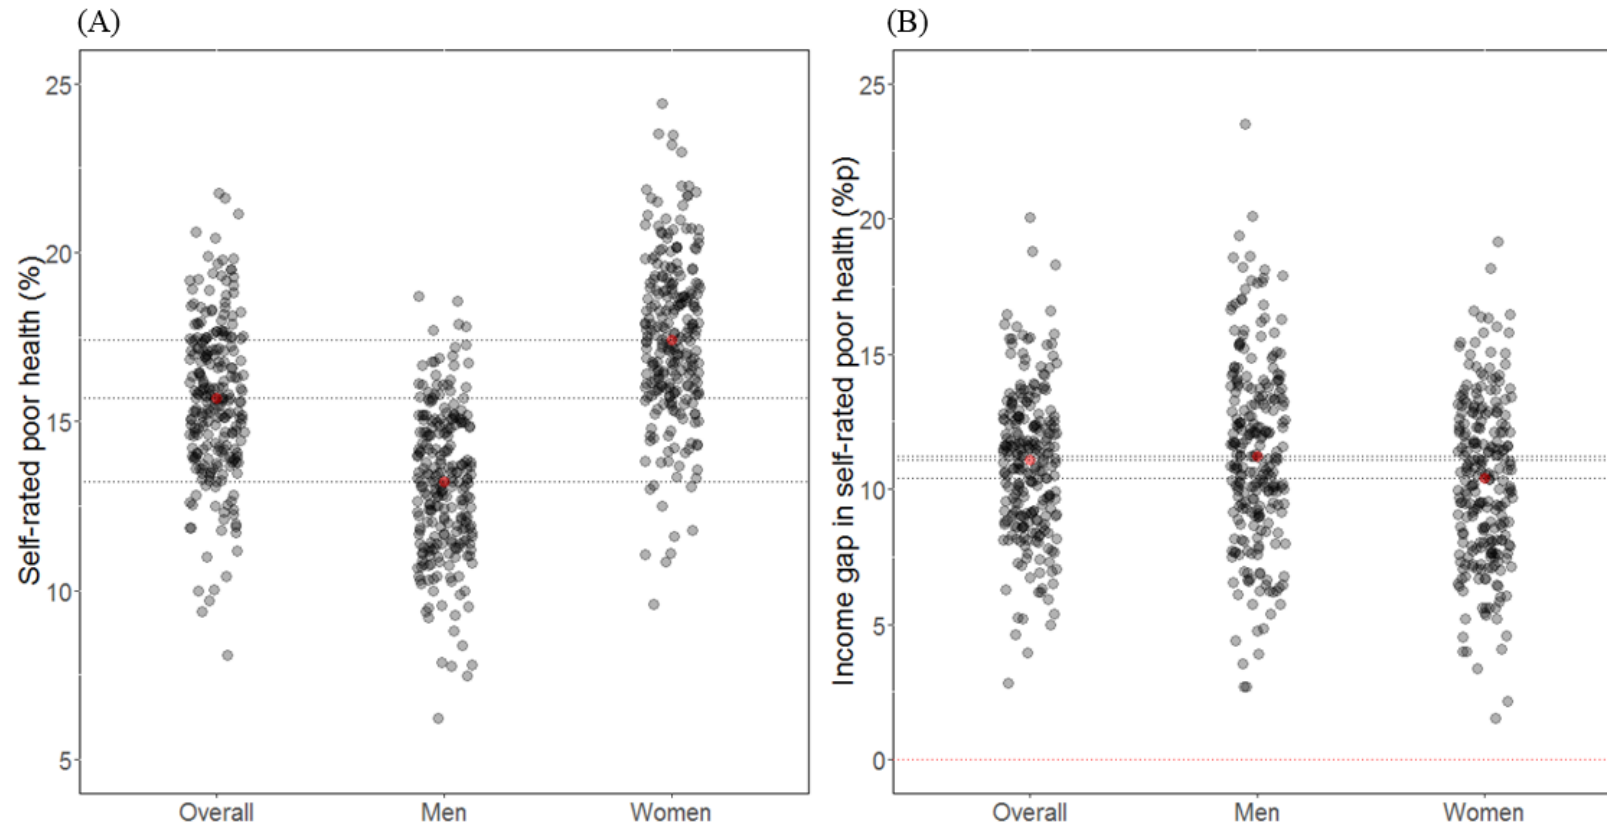

**Appendix 2.** Distribution of (A) age-standardized prevalences of self-rated poor health, and of (B) interquintile income gaps in self-rated poor health in the 245 local districts in South Korea, Findings from the Community Health Survey, 2008-2014

**Appendix 2.** Ten top and bottom districts in terms of age-standardized prevalences of self-rated poor health in South Korea: Findings from the Community Health Survey, 2008-2014

|       | Top 10            |                |                            | Bottom 10   |              |                            |
|-------|-------------------|----------------|----------------------------|-------------|--------------|----------------------------|
|       | Province          | District       | Self-rated poor health (%) | Province    | District     | Self-rated poor health (%) |
| Total | Jeollabuk-do      | Gochang-gun    | 21.8                       | Gyeonggi-do | Bundang-gu   | 8.1                        |
|       | Gyeongsangnam-do  | Namhae-gun     | 21.6                       | Seoul       | Seocho-gu    | 9.4                        |
|       | Gyeongsangnam-do  | Hadong-gun     | 21.2                       | Seoul       | Gangnam-gu   | 9.7                        |
|       | Gyeongsangbuk-do  | Yeongyang-gun  | 20.6                       | Seoul       | Songpa-gu    | 10.0                       |
|       | Gangwon-do        | Taebaek-si     | 20.4                       | Gyeonggi-do | Suji-gu      | 10.0                       |
|       | Gangwon-do        | Jeongseon-gun  | 19.9                       | Seoul       | Yongsan-gu   | 10.4                       |
|       | Chungcheongnam-do | Boryeong-si    | 19.8                       | Gyeonggi-do | Giheung-gu   | 11.0                       |
|       | Jeollanam-do      | Sinan-gun      | 19.8                       | Gyeonggi-do | Yeongtong-gu | 11.2                       |
|       | Gyeongsangbuk-do  | Bonghwa-gun    | 19.7                       | Gyeonggi-do | Ilsanseo-gu  | 11.7                       |
|       | Jeollabuk-do      | Buan-gun       | 19.5                       | Gyeonggi-do | Dongan-gu    | 11.8                       |
| Men   | Gangwon-do        | Taebaek-si     | 18.7                       | Gyeonggi-do | Bundang-gu   | 6.2                        |
|       | Gyeongsangnam-do  | Namhae-gun     | 18.6                       | Seoul       | Seocho-gu    | 7.5                        |
|       | Jeollabuk-do      | Gochang-gun    | 17.9                       | Seoul       | Gangnam-gu   | 7.8                        |
|       | Gangwon-do        | Jeongseon-gun  | 17.8                       | Seoul       | Songpa-gu    | 7.8                        |
|       | Gyeongsangnam-do  | Hadong-gun     | 17.7                       | Gyeonggi-do | Suji-gu      | 7.9                        |
|       | Gyeongsangbuk-do  | Yeongyang-gun  | 17.3                       | Gyeonggi-do | Giheung-gu   | 8.4                        |
|       | Jeollabuk-do      | Buan-gun       | 17.2                       | Gyeonggi-do | Gwacheon-si  | 8.8                        |
|       | Gyeongsangbuk-do  | Cheongsong-gun | 16.9                       | Gyeonggi-do | Dongan-gu    | 9.2                        |
|       | Gyeongsangnam-do  | Sancheong-gun  | 16.9                       | Seoul       | Mapo-gu      | 9.3                        |
|       | Chungcheongnam-do | Boryeong-si    | 16.8                       | Gyeonggi-do | Ilsandong-gu | 9.4                        |
| Women | Jeollabuk-do      | Gochang-gun    | 24.4                       | Gyeonggi-do | Bundang-gu   | 9.6                        |
|       | Gyeongsangnam-do  | Namhae-gun     | 23.5                       | Seoul       | Seocho-gu    | 10.8                       |
|       | Gyeongsangnam-do  | Hadong-gun     | 23.5                       | Seoul       | Yongsan-gu   | 11.1                       |
|       | Gyeongsangbuk-do  | Yeongyang-gun  | 23.2                       | Seoul       | Gangnam-gu   | 11.1                       |
|       | Gyeongsangbuk-do  | Bonghwa-gun    | 23.0                       | Gyeonggi-do | Suji-gu      | 11.6                       |
|       | Chungcheongnam-do | Boryeong-si    | 22.0                       | Seoul       | Songpa-gu    | 11.8                       |
|       | Jeollanam-do      | Sinan-gun      | 22.0                       | Gyeonggi-do | Yeongtong-gu | 12.5                       |
|       | Gyeongsangnam-do  | Tongyeong-si   | 21.9                       | Seoul       | Seongbuk-gu  | 13.0                       |
|       | Gangwon-do        | Taebaek-si     | 21.8                       | Gyeonggi-do | Giheung-gu   | 13.1                       |
|       | Jeollanam-do      | Hampyeong-gun  | 21.7                       | Gyeonggi-do | Gimpo-si     | 13.1                       |



Volume: 39, Article ID: e2017011,

<https://doi.org/10.4178/epih.e2017011>

**Appendix 3.** Ten top and bottom districts in terms of income gaps in self-rated poor health between the lowest and highest income quintiles in South Korea: Findings from the Community Health Survey in South Korea, 2008-2014

|       | Top 10            |                |                                                         | Bottom 10        |                 |                                                         |
|-------|-------------------|----------------|---------------------------------------------------------|------------------|-----------------|---------------------------------------------------------|
|       | Province          | District       | Interquintile income gap in self-rated poor health (%p) | Province         | District        | Interquintile income gap in self-rated poor health (%p) |
| Total | Jeollanam-do      | Goheung-gun    | 20.1                                                    | Gyeonggi-do      | Suji-gu         | 2.8                                                     |
|       | Busan             | Haeundae-gu    | 18.8                                                    | Gyeonggi-do      | Bundang-gu      | 4.0                                                     |
|       | Gyeongsangbuk-do  | Yecheon-gun    | 18.3                                                    | Gyeonggi-do      | Yeongtong-gu    | 4.6                                                     |
|       | Jeollanam-do      | Boseong-gun    | 16.6                                                    | Incheon          | Ongjin-gun      | 5.0                                                     |
|       | Gyeongsangbuk-do  | Yeongdeok-gun  | 16.5                                                    | Seoul            | Songpa-gu       | 5.2                                                     |
|       | Jeollanam-do      | Naju-si        | 16.1                                                    | Gyeonggi-do      | Dongan-gu       | 5.2                                                     |
|       | Jeollanam-do      | Wando-gun      | 16.0                                                    | Gyeonggi-do      | Gwangmyeong-si  | 5.4                                                     |
|       | Gangwon-do        | Samcheok-si    | 15.8                                                    | Seoul            | Seocho-gu       | 5.9                                                     |
|       | Gyeongsangnam-do  | Namhae-gun     | 15.7                                                    | Gyeonggi-do      | Gimpo-si        | 6.2                                                     |
|       | Chungcheongnam-do | Boryeong-si    | 15.6                                                    | Gyeonggi-do      | Osan-si         | 6.2                                                     |
| Men   | Jeollanam-do      | Goheung-gun    | 23.5                                                    | Gyeonggi-do      | Yeongtong-gu    | 2.7                                                     |
|       | Jeollanam-do      | Wando-gun      | 20.1                                                    | Gyeonggi-do      | Bundang-gu      | 2.7                                                     |
|       | Jeollanam-do      | Yeonggwang-gun | 19.4                                                    | Seoul            | Seongdong-gu    | 3.6                                                     |
|       | Jeollabuk-do      | Gochang-gun    | 18.6                                                    | Gyeonggi-do      | Dongan-gu       | 3.9                                                     |
|       | Jeollanam-do      | Boseong-gun    | 18.6                                                    | Gyeonggi-do      | Cheoin-gu       | 4.4                                                     |
|       | Gyeongsangnam-do  | Miryang-si     | 18.2                                                    | Incheon          | Yeonsu-gu       | 4.8                                                     |
|       | Jeollabuk-do      | Imsil-gun      | 18.1                                                    | Gyeonggi-do      | Suji-gu         | 4.8                                                     |
|       | Busan             | Haeundae-gu    | 17.9                                                    | Busan            | Sasang-gu       | 5.4                                                     |
|       | Jeollanam-do      | Naju-si        | 17.8                                                    | Gyeonggi-do      | Yeoju-gun       | 5.7                                                     |
|       | Gyeongsangbuk-do  | Yecheon-gun    | 17.7                                                    | Gyeonggi-do      | Gunpo-si        | 5.7                                                     |
| Women | Busan             | Haeundae-gu    | 19.2                                                    | Gyeonggi-do      | Suji-gu         | 1.5                                                     |
|       | Jeollanam-do      | Goheung-gun    | 18.2                                                    | Gyeongsangbuk-do | Cheongdo-gun    | 2.2                                                     |
|       | Gyeongsangbuk-do  | Uljin-gun      | 16.6                                                    | Gyeonggi-do      | Gimpo-si        | 3.4                                                     |
|       | Jeollanam-do      | Naju-si        | 16.5                                                    | Gyeonggi-do      | Ilsanseo-gu     | 4.0                                                     |
|       | Jeollanam-do      | Boseong-gun    | 16.4                                                    | Gyeonggi-do      | Bundang-gu      | 4.0                                                     |
|       | Jeollanam-do      | Hwasun-gun     | 16.3                                                    | Gyeonggi-do      | Osan-si         | 4.1                                                     |
|       | Jeollanam-do      | Hampyeong-gun  | 16.0                                                    | Gyeongsangnam-do | Changnyeong-gun | 4.5                                                     |
|       | Gyeongsangbuk-do  | Bonghwa-gun    | 15.8                                                    | Seoul            | Songpa-gu       | 4.6                                                     |
|       | Jeollabuk-do      | Iksan-si       | 15.8                                                    | Gyeonggi-do      | Dongan-gu       | 5.2                                                     |
|       | Jeollanam-do      | Yeonggwang-gun | 15.4                                                    | Gyeonggi-do      | Yeongtong-gu    | 5.2                                                     |

Volume: 39, Article ID: e2017011,

<https://doi.org/10.4178/epih.e2017011>

**Appendix 4.** Age-standardized prevalences of self-rated poor health, self-rated poor health prevalences according to income quintiles, and income gaps in self-rated poor health (between the highest [Q5] and the lowest [Q1] income quintiles) in 245 local districts of South Korea: Findings from the Community Health Survey in South Korea, 2008-2014

| Gender | Provinces | Districts       | Overall             | Q1 (Lowest)         | Q2                  | Q3                  | Q4                  | Q5 (Highest)        | Q1-Q5               | Urbanity     |
|--------|-----------|-----------------|---------------------|---------------------|---------------------|---------------------|---------------------|---------------------|---------------------|--------------|
| Total  | Seoul     | Jongno-gu       | 12.5<br>(11.7,13.4) | 20.3<br>(17.8,22.7) | 12.6<br>(10.8,14.5) | 12.2<br>(10.3,14.1) | 9.8<br>(8.1,11.4)   | 8.2<br>(6.7,9.7)    | 12.1<br>(7.1,13.1)  | Metropolitan |
| Total  | Seoul     | Jung-gu         | 13.5<br>(12.6,14.4) | 21.7<br>(19.1,24.2) | 14.5<br>(12.5,16.6) | 12.7<br>(10.8,14.5) | 10.2<br>(8.5,11.9)  | 9.2<br>(7.5,10.8)   | 12.5<br>(9.2,15.4)  | Metropolitan |
| Total  | Seoul     | Yongsan-gu      | 10.4<br>(9.7,11.2)  | 16.9<br>(14.6,19.2) | 9.8<br>(8.1,11.5)   | 8.8<br>(7.2,10.4)   | 8.7<br>(7.1,10.3)   | 8.1<br>(6.6,9.6)    | 8.8<br>(8.2,14.4)   | Metropolitan |
| Total  | Seoul     | Seongdong-gu    | 12.8<br>(11.9,13.8) | 16.3<br>(14.0,18.6) | 14.3<br>(12.2,16.3) | 12.9<br>(10.8,14.9) | 11.2<br>(9.3,13.0)  | 9.6<br>(7.8,11.4)   | 6.7<br>(2.4,7.8)    | Metropolitan |
| Total  | Seoul     | Gwangjin-gu     | 12.3<br>(11.3,13.2) | 16.4<br>(14.0,18.8) | 13.5<br>(11.3,15.6) | 11.5<br>(9.5,13.5)  | 9.3<br>(9.3,13.0)   | 9.0<br>(7.2,10.8)   | 7.4<br>(5.8,11.4)   | Metropolitan |
| Total  | Seoul     | Dongdaemun-gu   | 14.0<br>(13.1,14.9) | 18.9<br>(16.5,21.4) | 15.0<br>(13.0,17.1) | 13.3<br>(11.3,15.2) | 12.5<br>(10.5,14.4) | 10.3<br>(8.5,12.1)  | 8.6<br>(5.5,11.3)   | Metropolitan |
| Total  | Seoul     | Jungnang-gu     | 13.1<br>(12.2,14.0) | 19.8<br>(17.3,22.4) | 14.2<br>(12.1,16.2) | 11.6<br>(9.7,13.4)  | 11.3<br>(9.4,13.2)  | 8.8<br>(7.1,10.5)   | 11.0<br>(8.1,13.9)  | Metropolitan |
| Total  | Seoul     | Seongbuk-gu     | 11.9<br>(11.1,12.8) | 18.8<br>(16.4,21.2) | 11.1<br>(9.3,12.9)  | 11.0<br>(9.2,12.7)  | 10.4<br>(8.6,12.2)  | 8.5<br>(6.9,10.1)   | 10.3<br>(7.1,12.9)  | Metropolitan |
| Total  | Seoul     | Gangbuk-gu      | 13.9<br>(13.0,14.8) | 18.4<br>(16.0,20.8) | 16.4<br>(14.2,18.5) | 12.9<br>(11.0,14.8) | 11.2<br>(9.4,12.9)  | 10.4<br>(8.7,12.1)  | 8.0<br>(4.7,10.7)   | Metropolitan |
| Total  | Seoul     | Dobong-gu       | 13.8<br>(12.9,14.7) | 19.4<br>(17.0,21.9) | 14.5<br>(12.5,16.6) | 13.0<br>(11.0,14.9) | 10.8<br>(9.0,12.5)  | 11.7<br>(9.8,13.6)  | 7.7<br>(4.9,11.1)   | Metropolitan |
| Total  | Seoul     | Nowon-gu        | 14.2<br>(13.2,15.1) | 23.8<br>(21.0,26.5) | 15.8<br>(13.7,18.0) | 12.3<br>(10.4,14.3) | 10.1<br>(8.3,11.8)  | 8.8<br>(7.1,10.5)   | 15.0<br>(10.0,16.0) | Metropolitan |
| Total  | Seoul     | Eunpyeong-gu    | 14.3<br>(13.3,15.2) | 20.7<br>(18.2,23.3) | 15.7<br>(13.5,17.9) | 13.6<br>(11.6,15.6) | 11.4<br>(9.6,13.2)  | 10.1<br>(8.3,11.8)  | 10.6<br>(7.1,13.1)  | Metropolitan |
| Total  | Seoul     | Seodaemun-gu    | 13.7<br>(12.8,14.6) | 20.2<br>(17.7,22.7) | 14.9<br>(12.8,17.0) | 12.0<br>(10.1,13.9) | 12.8<br>(10.9,14.7) | 8.8<br>(7.2,10.4)   | 11.4<br>(8.1,13.9)  | Metropolitan |
| Total  | Seoul     | Mapo-gu         | 12.0<br>(11.1,12.9) | 17.0<br>(14.7,19.4) | 15.0<br>(12.8,17.2) | 11.8<br>(9.9,13.8)  | 9.1<br>(7.4,10.8)   | 7.2<br>(5.7,8.8)    | 9.8<br>(6.9,13.1)   | Metropolitan |
| Total  | Seoul     | Yangcheon-gu    | 13.5<br>(12.6,14.5) | 21.5<br>(18.7,24.2) | 13.5<br>(11.4,15.6) | 11.6<br>(9.6,13.5)  | 11.0<br>(9.0,12.9)  | 10.7<br>(8.8,12.6)  | 10.8<br>(6.0,12.4)  | Metropolitan |
| Total  | Seoul     | Gangseo-gu      | 13.7<br>(12.7,14.6) | 20.7<br>(18.1,23.4) | 15.8<br>(13.6,18.0) | 12.6<br>(10.6,14.6) | 12.6<br>(8.3,11.9)  | 9.4<br>(7.7,11.2)   | 11.3<br>(7.5,13.3)  | Metropolitan |
| Total  | Seoul     | Guro-gu         | 14.2<br>(13.3,15.2) | 22.0<br>(19.2,24.7) | 13.5<br>(11.4,15.6) | 14.1<br>(12.1,16.2) | 11.2<br>(9.3,13.1)  | 10.7<br>(8.8,12.6)  | 11.3<br>(7.6,13.8)  | Metropolitan |
| Total  | Seoul     | Geumcheon-gu    | 14.4<br>(13.5,15.3) | 21.0<br>(18.4,23.6) | 15.3<br>(13.1,17.4) | 13.8<br>(11.7,15.8) | 10.8<br>(9.0,12.6)  | 11.4<br>(9.5,13.3)  | 9.6<br>(4.5,10.5)   | Metropolitan |
| Total  | Seoul     | Yeongdeungpo-gu | 13.9<br>(13.0,14.9) | 21.1<br>(18.5,23.7) | 14.8<br>(12.7,17.0) | 12.7<br>(10.7,14.6) | 10.1<br>(8.3,11.8)  | 11.0<br>(9.1,12.9)  | 10.1<br>(7.4,13.4)  | Metropolitan |
| Total  | Seoul     | Dongjak-gu      | 14.3<br>(13.3,15.2) | 19.0<br>(16.5,21.5) | 15.1<br>(12.9,17.3) | 12.6<br>(10.6,14.6) | 14.0<br>(12.0,16.1) | 10.9<br>(9.1,12.7)  | 8.1<br>(3.9,9.9)    | Metropolitan |
| Total  | Seoul     | Gwanak-gu       | 14.2<br>(13.3,15.2) | 18.7<br>(16.1,21.3) | 15.7<br>(13.4,18.0) | 14.3<br>(12.1,16.4) | 11.4<br>(9.4,13.4)  | 11.4<br>(9.4,13.4)  | 7.3<br>(5.4,11.2)   | Metropolitan |
| Total  | Seoul     | Seocho-gu       | 9.4<br>(8.6,10.2)   | 12.9<br>(10.8,15.0) | 11.6<br>(9.6,13.6)  | 8.8<br>(7.1,10.5)   | 7.1<br>(5.6,8.6)    | 7.0<br>(5.4,8.6)    | 5.9<br>(3.7,8.9)    | Metropolitan |
| Total  | Seoul     | Gangnam-gu      | 9.7<br>(8.8,10.5)   | 14.6<br>(12.3,17.0) | 10.5<br>(8.5,12.4)  | 8.8<br>(7.1,10.6)   | 8.0<br>(6.4,9.7)    | 6.7<br>(5.2,8.3)    | 7.9<br>(5.8,11.2)   | Metropolitan |
| Total  | Seoul     | Songpa-gu       | 10.0<br>(9.2,10.9)  | 13.2<br>(11.0,15.4) | 9.4<br>(7.6,11.2)   | 10.0<br>(8.1,11.9)  | 9.6<br>(7.8,11.3)   | 8.0<br>(6.3,9.7)    | 5.2<br>(4.0,9.2)    | Metropolitan |
| Total  | Seoul     | Gangdong-gu     | 13.3<br>(12.3,14.2) | 17.6<br>(15.1,20.0) | 16.0<br>(13.8,18.3) | 12.1<br>(10.1,14.1) | 10.7<br>(8.8,12.7)  | 9.9<br>(8.0,11.9)   | 7.7<br>(5.2,11.6)   | Metropolitan |
| Total  | Busan     | Jung-gu         | 15.0<br>(14.1,15.9) | 21.4<br>(18.9,23.9) | 16.8<br>(14.7,18.8) | 15.5<br>(13.4,17.5) | 12.0<br>(10.3,13.8) | 9.8<br>(8.2,11.4)   | 11.6<br>(7.9,14.1)  | Metropolitan |
| Total  | Busan     | Seo-gu          | 15.1<br>(14.2,16.0) | 24.2<br>(21.6,26.8) | 14.9<br>(13.0,16.9) | 13.6<br>(11.7,15.5) | 12.3<br>(10.6,14.1) | 10.6<br>(8.9,12.3)  | 13.6<br>(8.8,15.2)  | Metropolitan |
| Total  | Busan     | Dong-gu         | 18.7<br>(17.7,19.7) | 29.4<br>(26.5,32.3) | 18.6<br>(16.3,20.8) | 16.6<br>(14.5,18.6) | 15.2<br>(13.2,17.2) | 13.8<br>(11.9,15.7) | 15.6<br>(11.3,18.1) | Metropolitan |
| Total  | Busan     | Yeongdo-gu      | 18.0<br>(17.0,18.9) | 27.9<br>(25.1,30.8) | 18.8<br>(16.6,21.1) | 16.4<br>(14.3,18.4) | 14.1<br>(12.2,16.0) | 13.1<br>(11.3,14.9) | 14.8<br>(10.6,17.4) | Metropolitan |
| Total  | Busan     | Busanjin-gu     | 15.2<br>(14.2,16.1) | 23.2<br>(20.6,25.8) | 16.4<br>(14.2,18.6) | 13.5<br>(11.5,15.5) | 12.2<br>(10.4,14.0) | 10.6<br>(8.8,12.3)  | 12.6<br>(10.0,16.2) | Metropolitan |
| Total  | Busan     | Dongnae-gu      | 13.5<br>(12.6,14.4) | 19.2<br>(16.9,21.5) | 14.2<br>(12.1,16.2) | 11.8<br>(10.0,13.6) | 12.0<br>(10.2,13.8) | 10.2<br>(8.4,12.0)  | 9.0<br>(6.9,12.7)   | Metropolitan |
| Total  | Busan     | Nam-gu          | 14.4<br>(13.5,15.3) | 19.9<br>(17.4,22.3) | 15.7<br>(13.6,17.8) | 14.2<br>(12.2,16.2) | 12.5<br>(10.7,14.4) | 10.1<br>(8.4,11.9)  | 9.8<br>(7.5,13.5)   | Metropolitan |

|       |         |              |                     |                     |                     |                     |                     |                     |                     |              |
|-------|---------|--------------|---------------------|---------------------|---------------------|---------------------|---------------------|---------------------|---------------------|--------------|
| Total | Busan   | Buk-gu       | 14.9<br>(13.9,15.9) | 23.6<br>(20.8,26.4) | 14.8<br>(12.6,17.0) | 14.8<br>(12.6,17.0) | 10.4<br>(8.6,12.2)  | 11.2<br>(9.2,13.2)  | 12.4<br>(10.9,17.1) | Metropolitan |
| Total | Busan   | Haebundae-gu | 14.7<br>(13.8,15.7) | 26.9<br>(24.1,29.8) | 14.4<br>(12.3,16.5) | 12.3<br>(10.4,14.2) | 12.3<br>(10.3,14.2) | 8.1<br>(6.5,9.6)    | 18.8<br>(15.3,21.5) | Metropolitan |
| Total | Busan   | Saha-gu      | 14.6<br>(13.6,15.5) | 22.8<br>(20.1,25.5) | 14.7<br>(12.6,16.8) | 12.5<br>(10.5,14.4) | 11.5<br>(9.6,13.4)  | 11.7<br>(9.8,13.6)  | 11.1<br>(8.1,14.5)  | Metropolitan |
| Total | Busan   | Geumjeong-gu | 13.3<br>(12.4,14.2) | 21.5<br>(18.9,24.1) | 14.5<br>(12.5,16.5) | 12.5<br>(10.6,14.4) | 10.5<br>(8.8,12.3)  | 8.2<br>(6.6,9.7)    | 13.3<br>(10.6,16.4) | Metropolitan |
| Total | Busan   | Gangseo-gu   | 16.8<br>(15.9,17.8) | 23.0<br>(20.4,25.5) | 18.1<br>(15.9,20.3) | 15.3<br>(13.2,17.3) | 14.2<br>(12.2,16.1) | 13.8<br>(11.8,15.7) | 9.2<br>(5.7,12.1)   | Metropolitan |
| Total | Busan   | Yeonje-gu    | 15.1<br>(14.1,16.0) | 24.7<br>(21.9,27.4) | 14.7<br>(12.7,16.8) | 12.6<br>(10.6,14.5) | 11.2<br>(9.5,13.0)  | 12.4<br>(10.4,14.3) | 12.3<br>(8.6,15.0)  | Metropolitan |
| Total | Busan   | Suyeong-gu   | 13.7<br>(12.9,14.6) | 20.0<br>(17.6,22.3) | 15.0<br>(12.9,17.0) | 11.2<br>(9.5,13.0)  | 11.9<br>(10.1,13.7) | 10.6<br>(8.9,12.3)  | 9.4<br>(6.2,12.4)   | Metropolitan |
| Total | Busan   | Sasang-gu    | 16.4<br>(15.4,17.4) | 22.3<br>(19.6,25.1) | 17.0<br>(14.7,19.4) | 15.1<br>(12.9,17.3) | 14.0<br>(11.9,16.2) | 13.7<br>(11.5,15.9) | 8.6<br>(4.8,11.2)   | Metropolitan |
| Total | Busan   | Gijang-gun   | 17.9<br>(16.9,18.9) | 23.8<br>(21.1,26.4) | 20.6<br>(18.2,23.1) | 17.3<br>(15.1,19.4) | 15.6<br>(13.5,17.6) | 12.5<br>(10.6,14.3) | 11.3<br>(7.7,14.3)  | Rural        |
| Total | Daegu   | Jung-gu      | 17.0<br>(16.0,18.0) | 25.5<br>(22.8,28.3) | 17.9<br>(15.8,20.1) | 15.4<br>(13.4,17.5) | 13.4<br>(11.6,15.3) | 12.8<br>(10.9,14.7) | 12.7<br>(9.2,15.8)  | Metropolitan |
| Total | Daegu   | Dong-gu      | 18.1<br>(17.1,19.1) | 25.6<br>(22.8,28.4) | 18.3<br>(16.0,20.6) | 17.8<br>(15.6,20.0) | 16.2<br>(14.0,18.4) | 12.9<br>(10.9,14.8) | 12.7<br>(9.4,15.8)  | Metropolitan |
| Total | Daegu   | Seo-gu       | 18.2<br>(17.2,19.2) | 25.3<br>(22.5,28.1) | 18.4<br>(16.1,20.8) | 16.1<br>(14.0,18.3) | 17.3<br>(15.1,19.6) | 13.7<br>(11.7,15.7) | 11.6<br>(5.6,12.2)  | Metropolitan |
| Total | Daegu   | Nam-gu       | 15.8<br>(14.9,16.8) | 22.8<br>(20.2,25.4) | 17.5<br>(15.3,19.8) | 15.0<br>(13.0,17.0) | 12.9<br>(11.0,14.8) | 11.1<br>(9.3,12.9)  | 11.7<br>(9.5,15.7)  | Metropolitan |
| Total | Daegu   | Buk-gu       | 14.7<br>(13.7,15.7) | 22.5<br>(19.7,25.3) | 15.6<br>(13.3,17.8) | 14.9<br>(12.7,17.1) | 10.8<br>(9.0,12.7)  | 10.1<br>(8.3,12.0)  | 12.4<br>(10.5,16.7) | Metropolitan |
| Total | Daegu   | Suseong-gu   | 15.1<br>(14.2,16.1) | 23.7<br>(21.0,26.5) | 16.1<br>(13.8,18.3) | 14.5<br>(12.4,16.5) | 11.5<br>(9.6,13.4)  | 10.3<br>(8.5,12.1)  | 13.4<br>(9.1,15.3)  | Metropolitan |
| Total | Daegu   | Dalseo-gu    | 16.0<br>(14.9,17.0) | 23.6<br>(20.8,26.3) | 18.3<br>(15.8,20.9) | 13.9<br>(11.8,16.1) | 12.9<br>(10.9,15.0) | 11.4<br>(9.4,13.4)  | 12.2<br>(8.9,15.1)  | Metropolitan |
| Total | Daegu   | Dalseong-gun | 17.2<br>(16.2,18.2) | 23.2<br>(20.5,25.9) | 18.3<br>(15.9,20.6) | 16.1<br>(13.9,18.3) | 13.8<br>(11.7,15.8) | 14.9<br>(12.7,17.0) | 8.3<br>(6.9,13.3)   | Rural        |
| Total | Incheon | Jung-gu      | 14.7<br>(13.8,15.6) | 21.2<br>(18.7,23.8) | 14.5<br>(12.5,16.5) | 14.7<br>(12.6,16.7) | 11.7<br>(9.9,13.5)  | 11.5<br>(9.6,13.3)  | 9.7<br>(7.4,14.6)   | Metropolitan |
| Total | Incheon | Dong-gu      | 14.1<br>(13.3,15.0) | 19.9<br>(17.4,22.3) | 14.9<br>(12.9,17.0) | 14.3<br>(12.3,16.3) | 11.1<br>(9.4,12.8)  | 10.9<br>(9.1,12.6)  | 9.0<br>(5.3,11.3)   | Metropolitan |
| Total | Incheon | Nam-gu       | 12.6<br>(11.7,13.4) | 19.0<br>(16.3,21.5) | 12.4<br>(10.4,14.3) | 11.2<br>(9.3,13.0)  | 10.9<br>(9.1,12.7)  | 9.9<br>(8.2,11.7)   | 9.1<br>(5.6,11.4)   | Metropolitan |
| Total | Incheon | Yeonsu-gu    | 13.9<br>(12.9,15.0) | 21.1<br>(18.2,23.9) | 14.5<br>(12.1,16.8) | 12.8<br>(10.6,14.9) | 11.6<br>(9.6,13.7)  | 10.3<br>(8.3,12.3)  | 10.8<br>(6.9,13.3)  | Metropolitan |
| Total | Incheon | Namdong-gu   | 15.0<br>(14.0,16.0) | 21.5<br>(18.7,24.3) | 15.4<br>(13.1,17.8) | 15.1<br>(12.8,17.4) | 10.6<br>(8.7,12.5)  | 12.3<br>(10.3,14.4) | 9.2<br>(7.7,14.3)   | Metropolitan |
| Total | Incheon | Bupyeong-gu  | 16.0<br>(14.9,17.0) | 24.3<br>(21.4,27.3) | 16.0<br>(13.7,18.4) | 15.5<br>(13.2,17.7) | 12.9<br>(10.9,14.9) | 11.8<br>(9.8,13.8)  | 12.5<br>(9.2,16.2)  | Metropolitan |
| Total | Incheon | Gyeyang-gu   | 15.7<br>(14.6,16.8) | 22.3<br>(19.3,25.3) | 17.5<br>(14.8,20.1) | 13.7<br>(11.5,15.9) | 12.9<br>(10.7,15.1) | 12.6<br>(10.4,14.8) | 9.7<br>(6.3,13.1)   | Metropolitan |
| Total | Incheon | Seo-gu       | 16.2<br>(15.1,17.3) | 21.9<br>(19.0,24.9) | 16.2<br>(13.7,18.6) | 15.5<br>(13.0,17.9) | 14.3<br>(12.0,16.6) | 13.5<br>(11.2,15.8) | 8.4<br>(5.5,12.7)   | Metropolitan |
| Total | Incheon | Ganghwa-gun  | 16.3<br>(15.3,17.2) | 22.0<br>(19.5,24.6) | 17.7<br>(15.5,19.9) | 15.4<br>(13.5,17.4) | 12.7<br>(10.9,14.4) | 13.4<br>(11.5,15.4) | 8.6<br>(4.3,10.7)   | Rural        |
| Total | Incheon | Ongjin-gun   | 12.7<br>(11.9,13.6) | 16.5<br>(14.3,18.7) | 12.7<br>(10.9,14.6) | 11.7<br>(9.9,13.5)  | 11.2<br>(9.5,12.9)  | 11.5<br>(9.7,13.3)  | 5.0<br>(3.0,9.8)    | Rural        |
| Total | Gwangju | Dong-gu      | 15.1<br>(14.2,16.0) | 23.4<br>(20.7,26.0) | 16.9<br>(14.8,19.1) | 13.5<br>(11.6,15.4) | 11.8<br>(10.1,13.6) | 10.5<br>(8.8,12.2)  | 12.9<br>(10.3,16.5) | Metropolitan |
| Total | Gwangju | Seo-gu       | 13.8<br>(12.8,14.7) | 19.7<br>(17.2,22.3) | 15.5<br>(13.2,17.8) | 11.9<br>(9.9,13.9)  | 11.7<br>(9.8,13.7)  | 10.5<br>(8.6,12.3)  | 9.2<br>(6.4,12.2)   | Metropolitan |
| Total | Gwangju | Nam-gu       | 15.3<br>(14.4,16.3) | 23.0<br>(20.4,25.7) | 16.5<br>(14.3,18.7) | 14.2<br>(12.3,16.2) | 12.1<br>(10.2,14.0) | 11.4<br>(9.6,13.2)  | 11.6<br>(8.9,15.1)  | Metropolitan |
| Total | Gwangju | Buk-gu       | 15.7<br>(14.7,16.7) | 23.1<br>(20.4,25.8) | 15.3<br>(13.1,17.5) | 15.3<br>(13.1,17.5) | 13.5<br>(11.5,15.6) | 11.5<br>(9.5,13.4)  | 11.6<br>(7.2,13.2)  | Metropolitan |
| Total | Gwangju | Gwangsan-gu  | 15.8<br>(14.7,16.8) | 23.9<br>(20.9,27.0) | 17.2<br>(14.7,19.7) | 14.7<br>(12.4,17.0) | 11.7<br>(9.6,13.8)  | 11.6<br>(9.5,13.8)  | 12.3<br>(8.7,15.5)  | Metropolitan |
| Total | Daejeon | Dong-gu      | 14.9<br>(14.0,15.8) | 25.4<br>(22.6,28.3) | 16.0<br>(13.9,18.1) | 12.0<br>(10.1,13.8) | 11.5<br>(9.7,13.4)  | 10.1<br>(8.4,11.8)  | 15.3<br>(10.7,16.9) | Metropolitan |
| Total | Daejeon | Jung-gu      | 13.3<br>(12.4,14.2) | 20.7<br>(18.2,23.3) | 13.3<br>(11.4,15.3) | 12.6<br>(10.7,14.6) | 11.5<br>(9.7,13.3)  | 8.9<br>(7.3,10.5)   | 11.8<br>(7.8,13.8)  | Metropolitan |
| Total | Daejeon | Seo-gu       | 14.0<br>(13.0,15.0) | 21.2<br>(18.3,24.0) | 15.1<br>(12.8,17.3) | 12.8<br>(10.6,15.0) | 11.7<br>(9.7,13.7)  | 9.7<br>(7.8,11.6)   | 11.5<br>(9.8,15.8)  | Metropolitan |
| Total | Daejeon | Yuseong-gu   | 12.4<br>(11.4,13.4) | 17.3<br>(14.7,19.8) | 15.0<br>(12.6,17.4) | 9.9<br>(8.0,11.8)   | 10.8<br>(8.7,12.9)  | 8.5<br>(6.5,10.4)   | 8.8<br>(5.9,11.7)   | Metropolitan |
| Total | Daejeon | Daedeok-gu   | 13.9<br>(13.0,14.9) | 19.4<br>(16.8,22.0) | 15.7<br>(13.5,17.9) | 12.0<br>(10.0,14.0) | 12.3<br>(10.2,14.3) | 10.4<br>(8.5,12.3)  | 9.0<br>(5.7,13.1)   | Metropolitan |

|       |             |                |                     |                     |                     |                     |                     |                     |                    |              |
|-------|-------------|----------------|---------------------|---------------------|---------------------|---------------------|---------------------|---------------------|--------------------|--------------|
| Total | Ulsan       | Jung-gu        | 15.7<br>(14.7,16.8) | 22.0<br>(19.3,24.7) | 15.4<br>(13.1,17.6) | 13.9<br>(11.7,16.2) | 13.7<br>(11.6,15.8) | 13.7<br>(11.5,15.9) | 8.3<br>(5.7,12.1)  | Metropolitan |
| Total | Ulsan       | Nam-gu         | 13.1<br>(12.1,14.1) | 17.8<br>(14.9,20.7) | 13.6<br>(11.3,15.9) | 12.3<br>(10.0,14.5) | 11.5<br>(9.4,13.6)  | 10.8<br>(8.7,13.0)  | 7.0<br>(4.9,10.7)  | Metropolitan |
| Total | Ulsan       | Dong-gu        | 12.5<br>(11.5,13.5) | 19.6<br>(16.7,22.5) | 14.4<br>(11.9,16.9) | 11.0<br>(8.9,13.1)  | 8.9<br>(7.0,10.8)   | 9.3<br>(7.2,11.4)   | 10.3<br>(7.8,13.4) | Metropolitan |
| Total | Ulsan       | Buk-gu         | 12.3<br>(11.3,13.4) | 15.8<br>(13.1,18.5) | 14.2<br>(11.8,16.6) | 12.6<br>(10.3,15.0) | 10.1<br>(8.0,12.2)  | 8.8<br>(6.8,10.9)   | 7.0<br>(4.3,10.3)  | Metropolitan |
| Total | Ulsan       | Ulju-gun       | 17.4<br>(16.4,18.5) | 25.4<br>(22.6,28.3) | 18.7<br>(16.3,21.1) | 15.3<br>(13.2,17.5) | 13.8<br>(11.8,15.8) | 14.6<br>(12.5,16.7) | 10.8<br>(7.8,14.4) | Rural        |
| Total | Sejong      | Sejong         | 17.0<br>(16.1,18.0) | 24.0<br>(21.4,26.7) | 18.2<br>(16.0,20.4) | 16.9<br>(14.8,19.1) | 14.0<br>(12.1,15.9) | 12.4<br>(10.6,14.3) | 11.6<br>(8.1,14.5) | Metropolitan |
| Total | Gyeonggi-do | Jangan-gu      | 13.6<br>(12.7,14.6) | 18.5<br>(16.0,21.0) | 15.8<br>(13.5,18.0) | 12.4<br>(10.3,14.4) | 11.7<br>(9.7,13.7)  | 9.7<br>(7.8,11.5)   | 8.8<br>(6.1,12.1)  | Metropolitan |
| Total | Gyeonggi-do | Gwonseon-gu    | 14.0<br>(12.9,15.0) | 20.2<br>(17.4,22.9) | 14.1<br>(11.8,16.4) | 13.1<br>(11.0,15.3) | 11.8<br>(9.7,13.9)  | 10.7<br>(8.7,12.8)  | 9.5<br>(5.7,11.7)  | Metropolitan |
| Total | Gyeonggi-do | Paldal-gu      | 14.1<br>(13.2,15.1) | 20.4<br>(17.7,23.0) | 14.7<br>(12.5,16.9) | 12.1<br>(10.1,14.1) | 11.9<br>(9.9,13.9)  | 11.8<br>(9.7,13.8)  | 8.6<br>(5.5,12.5)  | Metropolitan |
| Total | Gyeonggi-do | Yeongtong-gu   | 11.2<br>(10.1,12.2) | 14.9<br>(12.1,17.6) | 10.5<br>(8.2,12.7)  | 9.6<br>(7.4,11.7)   | 10.8<br>(8.5,13.2)  | 10.3<br>(8.0,12.7)  | 4.6<br>(2.3,10.1)  | Metropolitan |
| Total | Gyeonggi-do | Sujeong-gu     | 15.7<br>(14.6,16.7) | 22.0<br>(19.3,24.8) | 16.8<br>(14.5,19.1) | 14.1<br>(11.9,16.3) | 13.6<br>(11.6,15.7) | 11.8<br>(9.8,13.9)  | 10.2<br>(7.8,14.6) | Metropolitan |
| Total | Gyeonggi-do | Jungwon-gu     | 16.6<br>(15.5,17.6) | 24.1<br>(21.2,26.9) | 17.3<br>(15.0,19.7) | 14.6<br>(12.4,16.8) | 13.8<br>(11.6,15.9) | 13.3<br>(11.2,15.4) | 10.8<br>(7.7,14.3) | Metropolitan |
| Total | Gyeonggi-do | Bundang-gu     | 8.1<br>(7.3,8.8)    | 11.0<br>(9.1,13.0)  | 8.2<br>(6.5,9.8)    | 6.7<br>(5.2,8.1)    | 7.5<br>(5.9,9.1)    | 7.0<br>(5.4,8.6)    | 4.0<br>(0.9,6.1)   | Metropolitan |
| Total | Gyeonggi-do | Uijeongbu-si   | 15.2<br>(14.2,16.1) | 23.4<br>(20.6,26.1) | 17.0<br>(14.7,19.3) | 12.7<br>(10.7,14.7) | 11.9<br>(10.0,13.8) | 11.5<br>(9.6,13.3)  | 11.9<br>(8.2,14.6) | Urban        |
| Total | Gyeonggi-do | Manan-gu       | 13.6<br>(12.7,14.6) | 20.1<br>(17.5,22.7) | 14.8<br>(12.6,17.0) | 12.0<br>(10.1,13.9) | 11.2<br>(9.3,13.1)  | 10.6<br>(8.7,12.4)  | 9.5<br>(7.4,13.4)  | Metropolitan |
| Total | Gyeonggi-do | Dongan-gu      | 11.8<br>(10.9,12.7) | 15.8<br>(13.4,18.3) | 12.1<br>(10.0,14.3) | 11.3<br>(9.4,13.2)  | 9.2<br>(7.4,11.0)   | 10.6<br>(8.7,12.6)  | 5.2<br>(0.6,6.4)   | Metropolitan |
| Total | Gyeonggi-do | Wonmi-gu       | 14.1<br>(13.0,15.1) | 19.9<br>(17.1,22.6) | 15.1<br>(12.7,17.6) | 12.2<br>(10.2,14.3) | 12.0<br>(9.9,14.1)  | 11.6<br>(9.5,13.6)  | 8.3<br>(4.6,10.8)  | Metropolitan |
| Total | Gyeonggi-do | Sosa-gu        | 14.2<br>(13.2,15.2) | 20.0<br>(17.3,22.7) | 14.8<br>(12.6,17.0) | 13.3<br>(11.2,15.4) | 12.7<br>(10.6,14.7) | 10.8<br>(8.9,12.7)  | 9.2<br>(7.4,13.6)  | Metropolitan |
| Total | Gyeonggi-do | Ojeong-gu      | 15.2<br>(14.2,16.2) | 23.7<br>(20.8,26.5) | 15.6<br>(13.3,17.8) | 11.7<br>(9.7,13.6)  | 12.1<br>(10.1,14.1) | 13.1<br>(10.9,15.2) | 10.6<br>(6.2,12.8) | Metropolitan |
| Total | Gyeonggi-do | Gwangmyeong-si | 13.9<br>(12.9,14.8) | 18.4<br>(15.8,20.9) | 15.2<br>(13.0,17.4) | 12.2<br>(10.2,14.3) | 10.7<br>(8.8,12.6)  | 13.0<br>(10.8,15.1) | 5.4<br>(5.3,13.1)  | Urban        |
| Total | Gyeonggi-do | Pyeongtaek-si  | 14.9<br>(14.2,15.5) | 22.0<br>(20.1,23.8) | 15.1<br>(13.5,16.6) | 13.4<br>(11.9,14.8) | 12.6<br>(11.2,14.0) | 11.5<br>(10.2,12.8) | 10.5<br>(9.5,13.6) | Urban        |
| Total | Gyeonggi-do | Dongducheon-si | 16.3<br>(15.4,17.3) | 23.8<br>(21.1,26.5) | 17.3<br>(15.0,19.6) | 15.4<br>(13.3,17.5) | 14.0<br>(12.0,16.0) | 11.5<br>(9.7,13.4)  | 12.3<br>(9.0,15.4) | Urban        |
| Total | Gyeonggi-do | Sangnok-gu     | 13.8<br>(12.7,14.8) | 19.9<br>(17.2,22.7) | 14.5<br>(12.1,16.8) | 12.5<br>(10.3,14.7) | 11.4<br>(9.4,13.4)  | 10.7<br>(8.7,12.7)  | 9.2<br>(8.6,14.6)  | Metropolitan |
| Total | Gyeonggi-do | Danwon-gu      | 15.3<br>(14.2,16.4) | 22.6<br>(19.5,25.7) | 15.6<br>(13.1,18.0) | 14.0<br>(11.6,16.3) | 12.6<br>(10.3,14.9) | 12.1<br>(9.8,14.3)  | 10.5<br>(7.0,13.4) | Metropolitan |
| Total | Gyeonggi-do | Deogyang-gu    | 15.4<br>(14.4,16.4) | 23.7<br>(20.9,26.4) | 16.4<br>(14.2,18.7) | 13.1<br>(11.0,15.1) | 12.0<br>(10.1,13.9) | 11.9<br>(9.9,13.9)  | 11.8<br>(6.3,12.5) | Metropolitan |
| Total | Gyeonggi-do | Ilsandong-gu   | 12.5<br>(11.6,13.5) | 16.9<br>(14.4,19.4) | 13.4<br>(11.2,15.5) | 12.9<br>(10.8,14.9) | 11.1<br>(9.2,13.0)  | 8.7<br>(6.9,10.4)   | 8.2<br>(5.6,11.8)  | Metropolitan |
| Total | Gyeonggi-do | Ilsanseo-gu    | 11.7<br>(10.8,12.6) | 17.7<br>(15.2,20.2) | 11.2<br>(9.3,13.2)  | 10.1<br>(8.3,12.0)  | 9.4<br>(7.7,11.1)   | 10.5<br>(8.6,12.4)  | 7.2<br>(2.3,8.1)   | Metropolitan |
| Total | Gyeonggi-do | Gwacheon-si    | 11.9<br>(11.0,12.8) | 16.7<br>(14.3,19.1) | 11.6<br>(9.7,13.5)  | 11.1<br>(9.2,13.0)  | 10.9<br>(9.0,12.8)  | 9.4<br>(7.6,11.1)   | 7.3<br>(3.9,9.7)   | Urban        |
| Total | Gyeonggi-do | Guri-si        | 15.3<br>(14.3,16.4) | 21.4<br>(18.7,24.2) | 15.6<br>(13.3,17.9) | 14.5<br>(12.3,16.8) | 14.5<br>(12.3,16.6) | 10.6<br>(8.7,12.6)  | 10.8<br>(5.4,11.6) | Urban        |
| Total | Gyeonggi-do | Namyangju-si   | 14.8<br>(13.8,15.8) | 19.6<br>(17.0,22.1) | 15.6<br>(13.4,17.9) | 13.3<br>(11.3,15.3) | 12.5<br>(10.5,14.5) | 13.3<br>(11.2,15.4) | 6.3<br>(3.7,10.1)  | Urban        |
| Total | Gyeonggi-do | Osan-si        | 13.9<br>(12.9,15.0) | 17.6<br>(14.9,20.3) | 13.2<br>(10.9,15.6) | 13.3<br>(11.1,15.5) | 14.3<br>(11.9,16.7) | 11.4<br>(9.2,13.6)  | 6.2<br>(1.9,8.3)   | Urban        |
| Total | Gyeonggi-do | Siheung-si     | 14.7<br>(13.6,15.8) | 19.7<br>(16.9,22.5) | 15.8<br>(13.3,18.2) | 12.8<br>(10.6,14.9) | 13.8<br>(11.5,16.1) | 11.5<br>(9.3,13.6)  | 8.2<br>(5.7,13.3)  | Urban        |
| Total | Gyeonggi-do | Gunpo-si       | 14.5<br>(13.5,15.5) | 21.9<br>(19.1,24.7) | 13.5<br>(11.4,15.6) | 12.2<br>(10.2,14.3) | 13.4<br>(11.2,15.5) | 11.9<br>(9.8,13.9)  | 10.0<br>(5.6,11.8) | Urban        |
| Total | Gyeonggi-do | Uiwang-si      | 12.8<br>(11.9,13.7) | 18.2<br>(15.7,20.6) | 13.8<br>(11.6,16.0) | 10.4<br>(8.6,12.3)  | 11.2<br>(9.4,13.1)  | 10.7<br>(8.8,12.6)  | 7.5<br>(5.1,11.1)  | Urban        |
| Total | Gyeonggi-do | Hanam-si       | 14.6<br>(13.7,15.6) | 18.9<br>(16.4,21.4) | 15.8<br>(13.6,18.1) | 13.6<br>(11.5,15.7) | 12.9<br>(11.0,14.9) | 12.4<br>(10.4,14.4) | 6.5<br>(3.7,10.3)  | Urban        |
| Total | Gyeonggi-do | Cheoin-gu      | 13.4<br>(12.5,14.3) | 18.2<br>(15.8,20.6) | 14.4<br>(12.3,16.5) | 12.6<br>(10.7,14.5) | 12.2<br>(10.2,14.1) | 9.8<br>(8.0,11.5)   | 8.4<br>(1.7,8.9)   | Metropolitan |
| Total | Gyeonggi-do | Giheung-gu     | 11.0<br>(10.2,11.9) | 16.2<br>(13.8,18.6) | 10.9<br>(9.0,12.8)  | 10.2<br>(8.4,12.1)  | 10.0<br>(8.1,11.8)  | 8.1<br>(6.4,9.7)    | 8.1<br>(4.5,10.1)  | Metropolitan |

|       |                   |                 |                     |                     |                     |                     |                     |                     |                     |              |
|-------|-------------------|-----------------|---------------------|---------------------|---------------------|---------------------|---------------------|---------------------|---------------------|--------------|
| Total | Gyeonggi-do       | Suji-gu         | 10.0<br>(9.1,10.8)  | 12.0<br>(9.9,14.0)  | 10.1<br>(8.2,11.9)  | 10.4<br>(8.5,12.2)  | 8.4<br>(6.7,10.0)   | 9.2<br>(7.5,11.0)   | 2.8<br>(-0.1,5.5)   | Metropolitan |
| Total | Gyeonggi-do       | Paju-si         | 14.7<br>(13.8,15.7) | 21.7<br>(19.0,24.4) | 15.4<br>(13.3,17.6) | 13.4<br>(11.4,15.4) | 11.6<br>(9.7,13.4)  | 12.0<br>(10.1,13.9) | 9.7<br>(5.4,11.6)   | Urban        |
| Total | Gyeonggi-do       | Icheon-si       | 15.4<br>(14.4,16.3) | 21.3<br>(18.7,23.9) | 16.1<br>(13.9,18.3) | 13.4<br>(11.4,15.5) | 13.5<br>(11.4,15.5) | 12.5<br>(10.5,14.5) | 8.8<br>(6.4,12.6)   | Urban        |
| Total | Gyeonggi-do       | Anseong-si      | 15.3<br>(14.3,16.2) | 20.9<br>(18.4,23.3) | 15.7<br>(13.6,17.9) | 13.5<br>(11.5,15.5) | 13.8<br>(11.8,15.8) | 12.2<br>(10.4,14.1) | 8.7<br>(4.0,11.4)   | Urban        |
| Total | Gyeonggi-do       | Gimpo-si        | 11.9<br>(11.1,12.8) | 15.7<br>(13.4,17.9) | 12.6<br>(10.6,14.6) | 11.2<br>(9.4,13.1)  | 10.8<br>(9.0,12.6)  | 9.5<br>(7.8,11.3)   | 6.2<br>(2.9,8.5)    | Urban        |
| Total | Gyeonggi-do       | Hwaseong-si     | 13.6<br>(12.7,14.6) | 19.5<br>(16.9,22.1) | 14.8<br>(12.5,17.1) | 12.8<br>(10.7,14.9) | 11.9<br>(9.9,13.9)  | 9.4<br>(7.5,11.2)   | 10.1<br>(8.0,13.8)  | Urban        |
| Total | Gyeonggi-do       | Gwangju-si      | 13.2<br>(12.3,14.1) | 17.4<br>(15.0,19.8) | 14.3<br>(12.2,16.4) | 12.5<br>(10.5,14.4) | 10.6<br>(8.7,12.4)  | 11.1<br>(9.2,13.0)  | 6.3<br>(4.2,11.2)   | Urban        |
| Total | Gyeonggi-do       | Yangju-si       | 15.5<br>(14.5,16.5) | 21.6<br>(19.0,24.3) | 15.8<br>(13.6,18.0) | 13.3<br>(11.3,15.3) | 14.7<br>(12.6,16.7) | 12.5<br>(10.5,14.5) | 9.1<br>(6.1,12.3)   | Urban        |
| Total | Gyeonggi-do       | Pocheon-si      | 16.6<br>(15.6,17.6) | 23.8<br>(21.2,26.5) | 17.7<br>(15.5,19.9) | 15.2<br>(13.2,17.3) | 14.1<br>(12.2,16.0) | 12.4<br>(10.6,14.3) | 11.4<br>(6.9,13.3)  | Urban        |
| Total | Gyeonggi-do       | Yeoju-gun       | 16.6<br>(15.6,17.5) | 21.4<br>(19.0,23.9) | 18.4<br>(16.2,20.6) | 15.1<br>(13.1,17.1) | 14.4<br>(12.5,16.4) | 13.8<br>(11.8,15.7) | 7.6<br>(2.9,9.3)    | Urban        |
| Total | Gyeonggi-do       | Yeoncheon-gun   | 15.7<br>(14.8,16.6) | 22.9<br>(20.4,25.5) | 16.5<br>(14.5,18.5) | 15.1<br>(13.1,17.0) | 13.5<br>(11.6,15.3) | 10.6<br>(9.0,12.2)  | 12.3<br>(8.2,14.4)  | Rural        |
| Total | Gyeonggi-do       | Gapyeong-gun    | 14.9<br>(14.0,15.8) | 23.2<br>(20.6,25.8) | 16.6<br>(14.6,18.7) | 13.5<br>(11.7,15.4) | 10.8<br>(9.2,12.5)  | 10.5<br>(8.8,12.1)  | 12.7<br>(9.4,15.6)  | Rural        |
| Total | Gyeonggi-do       | Yangpyeong-gun  | 15.9<br>(15.0,16.8) | 20.4<br>(18.0,22.8) | 18.0<br>(15.8,20.1) | 14.7<br>(12.7,16.6) | 15.0<br>(13.1,17.0) | 11.4<br>(9.6,13.1)  | 9.0<br>(5.8,12.0)   | Rural        |
| Total | Gangwon-do        | Chuncheon-si    | 13.9<br>(13.0,14.8) | 22.4<br>(19.8,25.0) | 15.4<br>(13.3,17.5) | 11.7<br>(9.9,13.5)  | 11.3<br>(9.5,13.1)  | 9.2<br>(7.6,10.8)   | 13.2<br>(9.0,15.8)  | Urban        |
| Total | Gangwon-do        | Wonju-si        | 14.6<br>(13.7,15.6) | 21.7<br>(19.1,24.4) | 17.4<br>(15.1,19.7) | 11.5<br>(9.7,13.4)  | 12.7<br>(10.7,14.6) | 10.0<br>(8.2,11.8)  | 11.7<br>(7.9,14.1)  | Urban        |
| Total | Gangwon-do        | Gangneung-si    | 15.3<br>(14.4,16.2) | 22.6<br>(20.0,25.2) | 16.3<br>(14.2,18.3) | 13.6<br>(11.7,15.4) | 13.2<br>(11.3,15.1) | 11.3<br>(9.5,13.1)  | 11.3<br>(9.3,15.5)  | Urban        |
| Total | Gangwon-do        | Donghae-si      | 15.3<br>(14.3,16.2) | 22.6<br>(20.0,25.2) | 16.5<br>(14.4,18.6) | 14.1<br>(12.1,16.1) | 11.8<br>(10.0,13.6) | 11.6<br>(9.7,13.4)  | 11.0<br>(8.6,14.8)  | Urban        |
| Total | Gangwon-do        | Taebaek-si      | 20.4<br>(19.4,21.5) | 28.4<br>(25.5,31.2) | 22.4<br>(20.0,24.9) | 19.9<br>(17.7,22.2) | 15.9<br>(13.9,18.0) | 15.9<br>(13.5,17.6) | 12.8<br>(10.0,17.0) | Urban        |
| Total | Gangwon-do        | Sokcho-si       | 17.3<br>(16.3,18.3) | 26.1<br>(23.3,28.9) | 17.8<br>(15.6,20.0) | 15.2<br>(13.1,17.2) | 13.3<br>(11.4,15.2) | 14.5<br>(12.4,16.6) | 11.6<br>(8.0,14.6)  | Urban        |
| Total | Gangwon-do        | Samcheok-si     | 17.5<br>(16.5,18.4) | 27.7<br>(24.8,30.6) | 18.3<br>(16.1,20.5) | 16.5<br>(14.5,18.5) | 13.5<br>(11.6,15.4) | 11.9<br>(10.2,13.7) | 15.8<br>(10.8,17.4) | Urban        |
| Total | Gangwon-do        | Hongcheon-gun   | 15.1<br>(14.2,16.0) | 22.4<br>(19.9,24.9) | 16.5<br>(14.4,18.5) | 13.6<br>(11.8,15.4) | 11.3<br>(9.7,13.0)  | 12.2<br>(10.4,14.0) | 10.2<br>(7.9,14.5)  | Rural        |
| Total | Gangwon-do        | Hoengseong-gun  | 17.4<br>(16.5,18.4) | 23.7<br>(21.0,26.3) | 18.8<br>(16.6,21.0) | 17.0<br>(14.9,19.1) | 15.1<br>(13.1,17.1) | 12.6<br>(10.7,14.5) | 11.1<br>(7.6,14.0)  | Rural        |
| Total | Gangwon-do        | Yeongwol-gun    | 18.8<br>(17.8,19.8) | 28.1<br>(25.1,31.0) | 20.6<br>(18.3,22.9) | 15.9<br>(13.9,17.8) | 15.6<br>(13.7,17.6) | 14.2<br>(12.3,16.1) | 13.9<br>(10.3,17.1) | Rural        |
| Total | Gangwon-do        | Pyeongchang-gun | 16.3<br>(15.3,17.2) | 24.2<br>(21.6,26.8) | 17.4<br>(15.4,19.5) | 13.9<br>(12.1,15.8) | 14.4<br>(12.5,16.3) | 11.6<br>(9.8,13.3)  | 12.6<br>(7.9,14.3)  | Rural        |
| Total | Gangwon-do        | Jeongseon-gun   | 19.9<br>(18.9,20.9) | 27.4<br>(24.6,30.2) | 20.7<br>(18.4,22.9) | 20.0<br>(17.7,22.2) | 18.0<br>(15.9,20.2) | 13.7<br>(11.8,15.6) | 13.7<br>(11.7,18.5) | Rural        |
| Total | Gangwon-do        | Cheorwon-gun    | 14.7<br>(13.8,15.6) | 23.5<br>(20.9,26.1) | 15.3<br>(13.4,17.3) | 13.3<br>(11.4,15.1) | 11.5<br>(9.7,13.2)  | 10.1<br>(8.4,11.7)  | 13.4<br>(11.3,17.7) | Rural        |
| Total | Gangwon-do        | Hwacheon-gun    | 15.6<br>(14.6,16.5) | 22.5<br>(19.8,25.2) | 17.0<br>(14.8,19.2) | 13.6<br>(11.7,15.5) | 13.5<br>(11.5,15.4) | 11.6<br>(9.9,13.4)  | 10.9<br>(8.9,15.3)  | Rural        |
| Total | Gangwon-do        | Yanggu-gun      | 16.1<br>(15.2,17.1) | 22.9<br>(20.2,25.5) | 16.8<br>(14.6,19.0) | 14.7<br>(12.8,16.7) | 13.2<br>(11.3,15.1) | 13.3<br>(11.4,15.2) | 9.6<br>(5.9,12.5)   | Rural        |
| Total | Gangwon-do        | Inje-gun        | 15.6<br>(14.7,16.6) | 23.1<br>(20.5,25.7) | 15.5<br>(13.5,17.6) | 14.6<br>(12.7,16.6) | 13.1<br>(11.2,15.0) | 11.6<br>(9.8,13.5)  | 11.5<br>(8.6,15.0)  | Rural        |
| Total | Gangwon-do        | Goseong-gun     | 15.4<br>(14.5,16.3) | 21.3<br>(18.7,23.8) | 17.8<br>(15.5,20.1) | 14.8<br>(12.8,16.8) | 12.7<br>(10.9,14.5) | 10.6<br>(8.9,12.3)  | 10.7<br>(7.9,14.1)  | Rural        |
| Total | Gangwon-do        | Yangyang-gun    | 15.1<br>(14.2,16.0) | 22.6<br>(20.0,25.2) | 17.2<br>(15.1,19.3) | 13.3<br>(11.4,15.2) | 12.9<br>(11.1,14.7) | 9.5<br>(8.0,11.0)   | 13.1<br>(9.7,15.9)  | Rural        |
| Total | Chungcheongbuk-do | Cheongju-si     | 13.8<br>(13.2,14.3) | 20.7<br>(19.1,22.2) | 15.4<br>(14.1,16.8) | 12.1<br>(11.0,13.2) | 11.2<br>(10.2,12.3) | 10.2<br>(9.2,11.2)  | 10.5<br>(8.2,11.8)  | Metropolitan |
| Total | Chungcheongbuk-do | Chungju-si      | 17.5<br>(16.5,18.5) | 25.0<br>(22.3,27.7) | 20.3<br>(18.0,22.6) | 15.4<br>(13.4,17.5) | 13.8<br>(11.9,15.7) | 13.2<br>(11.3,15.2) | 11.8<br>(9.1,15.5)  | Urban        |
| Total | Chungcheongbuk-do | Jecheon-si      | 15.1<br>(14.2,16.0) | 21.9<br>(19.4,24.4) | 15.2<br>(13.2,17.1) | 14.6<br>(12.7,16.6) | 12.6<br>(10.8,14.4) | 11.5<br>(9.7,13.3)  | 10.4<br>(7.7,14.1)  | Urban        |
| Total | Chungcheongbuk-do | Boeun-gun       | 17.9<br>(17.0,18.9) | 26.8<br>(23.9,29.8) | 20.6<br>(18.3,23.0) | 15.2<br>(13.4,17.1) | 14.5<br>(12.5,16.4) | 13.6<br>(11.7,15.5) | 13.2<br>(10.6,17.4) | Rural        |
| Total | Chungcheongbuk-do | Okcheon-gun     | 16.3<br>(15.4,17.2) | 21.2<br>(18.8,23.7) | 18.5<br>(16.4,20.7) | 15.3<br>(13.4,17.3) | 14.3<br>(12.4,16.1) | 12.2<br>(10.3,14.0) | 9.0<br>(5.4,11.8)   | Rural        |
| Total | Chungcheongbuk-do | Yeongdong-gun   | 16.3<br>(15.4,17.2) | 24.9<br>(22.2,27.5) | 16.9<br>(14.8,18.9) | 14.3<br>(12.5,16.1) | 13.1<br>(11.4,14.9) | 12.5<br>(10.7,14.3) | 12.4<br>(8.4,14.8)  | Rural        |

|       |                   |                 |                     |                     |                     |                     |                     |                     |                     |              |
|-------|-------------------|-----------------|---------------------|---------------------|---------------------|---------------------|---------------------|---------------------|---------------------|--------------|
| Total | Chungcheongbuk-do | Jincheon-gun    | 16.8<br>(15.9,17.8) | 23.8<br>(21.1,26.5) | 15.1<br>(13.0,17.2) | 16.8<br>(14.6,18.9) | 13.5<br>(11.6,15.4) | 15.2<br>(13.1,17.2) | 8.6<br>(4.6,11.4)   | Rural        |
| Total | Chungcheongbuk-do | Goesan-gun      | 15.6<br>(14.7,16.5) | 21.2<br>(18.7,23.6) | 15.4<br>(13.4,17.5) | 14.9<br>(12.9,16.9) | 14.1<br>(12.1,16.0) | 12.6<br>(10.8,14.5) | 8.6<br>(6.7,12.9)   | Rural        |
| Total | Chungcheongbuk-do | Eumseong-gun    | 17.5<br>(16.5,18.4) | 25.2<br>(22.4,28.0) | 19.5<br>(17.1,21.8) | 16.8<br>(14.8,18.8) | 13.5<br>(11.7,15.2) | 12.6<br>(10.8,14.4) | 12.6<br>(9.8,16.4)  | Rural        |
| Total | Chungcheongbuk-do | Danyang-gun     | 17.7<br>(16.7,18.6) | 26.9<br>(24.1,29.7) | 16.6<br>(14.4,18.7) | 15.7<br>(13.7,17.7) | 14.3<br>(12.5,16.2) | 15.4<br>(13.3,17.5) | 11.5<br>(6.2,13.0)  | Rural        |
| Total | Chungcheongbuk-do | Jeungpyeong-gun | 14.9<br>(14.1,15.8) | 22.4<br>(19.9,24.9) | 14.8<br>(13.0,16.6) | 14.1<br>(12.3,15.8) | 13.1<br>(11.3,14.8) | 10.4<br>(8.8,12.0)  | 12.0<br>(9.3,15.5)  | Rural        |
| Total | Chungcheongnam-do | Cheonan-si      | 16.0<br>(14.9,17.0) | 23.0<br>(20.0,26.0) | 17.9<br>(15.4,20.4) | 14.5<br>(12.3,16.8) | 13.5<br>(11.3,15.7) | 11.6<br>(9.6,13.7)  | 11.4<br>(8.3,14.7)  | Metropolitan |
| Total | Chungcheongnam-do | Gongju-si       | 17.2<br>(16.2,18.1) | 25.3<br>(22.6,28.0) | 18.0<br>(15.8,20.1) | 16.6<br>(14.5,18.6) | 14.3<br>(12.4,16.1) | 11.9<br>(10.1,13.7) | 13.4<br>(10.3,16.7) | Urban        |
| Total | Chungcheongnam-do | Boryeong-si     | 19.8<br>(18.8,20.8) | 30.1<br>(27.3,33.1) | 22.5<br>(20.0,24.9) | 15.7<br>(13.8,17.6) | 16.9<br>(14.8,19.0) | 14.5<br>(12.5,16.4) | 15.6<br>(11.9,18.9) | Urban        |
| Total | Chungcheongnam-do | Asan-si         | 15.9<br>(14.9,16.9) | 24.3<br>(21.4,27.2) | 16.7<br>(14.4,18.9) | 14.2<br>(12.1,16.3) | 12.8<br>(10.8,14.8) | 11.7<br>(9.8,13.6)  | 12.6<br>(9.3,15.7)  | Urban        |
| Total | Chungcheongnam-do | Seosan-si       | 16.0<br>(15.1,17.0) | 21.8<br>(19.3,24.3) | 17.2<br>(15.1,19.4) | 14.5<br>(12.5,16.5) | 14.3<br>(12.3,16.3) | 12.5<br>(10.6,14.3) | 9.3<br>(6.2,12.4)   | Urban        |
| Total | Chungcheongnam-do | Nonsan-si       | 17.1<br>(16.1,18.0) | 26.1<br>(23.3,28.8) | 17.6<br>(15.6,19.7) | 15.2<br>(13.3,17.2) | 14.1<br>(12.2,16.0) | 12.2<br>(10.4,14.0) | 13.9<br>(10.9,17.7) | Urban        |
| Total | Chungcheongnam-do | Gyeryong-si     | 13.5<br>(12.5,14.5) | 18.7<br>(16.0,21.4) | 15.7<br>(13.3,18.1) | 11.3<br>(9.2,13.4)  | 12.0<br>(9.9,14.1)  | 10.0<br>(8.0,11.9)  | 8.7<br>(4.7,10.7)   | Urban        |
| Total | Chungcheongnam-do | Dangjin-si      | 16.4<br>(15.4,17.3) | 23.6<br>(21.0,26.2) | 16.4<br>(14.3,18.5) | 16.2<br>(14.1,18.4) | 13.8<br>(11.9,15.7) | 12.3<br>(10.4,14.1) | 11.3<br>(6.3,12.7)  | Rural        |
| Total | Chungcheongnam-do | Geumsan-gun     | 16.8<br>(15.9,17.7) | 22.9<br>(20.4,25.5) | 19.7<br>(17.5,21.9) | 15.2<br>(13.4,17.1) | 13.9<br>(12.1,15.7) | 12.1<br>(10.4,13.7) | 10.8<br>(6.9,13.3)  | Rural        |
| Total | Chungcheongnam-do | Buyeo-gun       | 15.8<br>(14.9,16.7) | 22.9<br>(20.3,25.6) | 17.7<br>(15.6,19.8) | 13.6<br>(11.9,15.3) | 14.0<br>(12.2,15.9) | 11.2<br>(9.6,12.9)  | 11.7<br>(7.6,13.8)  | Rural        |
| Total | Chungcheongnam-do | Seocheon-gun    | 17.0<br>(16.1,18.0) | 25.2<br>(22.4,28.0) | 17.0<br>(14.9,19.1) | 15.2<br>(13.3,17.1) | 15.1<br>(13.1,17.0) | 13.1<br>(11.2,15.0) | 12.1<br>(7.4,14.0)  | Rural        |
| Total | Chungcheongnam-do | Cheongyang-gun  | 15.2<br>(14.4,16.1) | 22.8<br>(20.1,25.4) | 16.6<br>(14.6,18.6) | 15.3<br>(13.4,17.2) | 11.9<br>(10.1,13.6) | 9.9<br>(8.4,11.3)   | 12.9<br>(10.8,17.4) | Rural        |
| Total | Chungcheongnam-do | Hongseong-gun   | 16.8<br>(15.9,17.7) | 22.8<br>(20.3,25.4) | 18.1<br>(15.9,20.2) | 15.6<br>(13.6,17.5) | 14.5<br>(12.6,16.5) | 13.1<br>(11.3,14.9) | 9.7<br>(8.0,14.4)   | Rural        |
| Total | Chungcheongnam-do | Yesan-gun       | 15.6<br>(14.8,16.5) | 23.9<br>(21.3,26.6) | 16.9<br>(14.8,18.9) | 13.3<br>(11.5,15.0) | 12.5<br>(10.8,14.2) | 12.3<br>(10.5,14.1) | 11.6<br>(9.0,15.6)  | Rural        |
| Total | Chungcheongnam-do | Tae'an-gun      | 15.9<br>(15.0,16.8) | 20.8<br>(18.4,23.2) | 17.9<br>(15.8,20.1) | 15.6<br>(13.7,17.6) | 13.4<br>(11.6,15.3) | 11.7<br>(10.0,13.5) | 9.1<br>(5.4,11.6)   | Urban        |
| Total | Jeollabuk-do      | Jeonju-si       | 14.0<br>(13.1,15.0) | 21.6<br>(19.0,24.3) | 14.9<br>(12.8,17.1) | 12.5<br>(10.5,14.4) | 11.5<br>(9.7,13.4)  | 10.3<br>(8.5,12.1)  | 11.3<br>(9.9,16.7)  | Metropolitan |
| Total | Jeollabuk-do      | Gunsan-si       | 17.7<br>(16.7,18.7) | 26.2<br>(23.4,29.0) | 17.5<br>(15.3,19.7) | 15.6<br>(13.5,17.7) | 15.9<br>(13.8,18.1) | 13.7<br>(11.8,15.7) | 12.5<br>(10.6,18.6) | Urban        |
| Total | Jeollabuk-do      | Iksan-si        | 18.5<br>(17.4,19.5) | 29.0<br>(26.1,31.9) | 18.4<br>(16.2,20.7) | 17.1<br>(14.9,19.2) | 14.5<br>(12.6,16.5) | 13.4<br>(11.5,15.3) | 15.6<br>(12.9,19.7) | Urban        |
| Total | Jeollabuk-do      | Jeongeup-si     | 19.0<br>(18.0,20.0) | 29.6<br>(26.6,32.5) | 19.0<br>(16.8,21.2) | 17.9<br>(15.8,20.0) | 13.9<br>(12.0,15.7) | 15.0<br>(13.0,17.0) | 14.6<br>(10.5,17.3) | Urban        |
| Total | Jeollabuk-do      | Namwon-si       | 18.4<br>(17.5,19.4) | 25.8<br>(23.1,28.5) | 20.9<br>(18.6,23.2) | 17.1<br>(15.0,19.2) | 13.5<br>(11.8,15.3) | 15.1<br>(13.2,17.0) | 10.7<br>(10.5,18.1) | Urban        |
| Total | Jeollabuk-do      | Gimje-si        | 17.7<br>(16.7,18.7) | 26.4<br>(23.6,29.2) | 17.9<br>(15.8,20.0) | 15.7<br>(13.7,17.6) | 15.7<br>(13.7,17.7) | 13.2<br>(11.3,15.1) | 13.2<br>(6.3,14.7)  | Urban        |
| Total | Jeollabuk-do      | Wanju-gun       | 16.7<br>(15.8,17.6) | 24.3<br>(21.7,27.0) | 19.4<br>(17.2,21.6) | 15.4<br>(13.5,17.3) | 12.2<br>(10.4,13.9) | 12.5<br>(10.8,14.2) | 11.8<br>(8.7,17.3)  | Rural        |
| Total | Jeollabuk-do      | Jinan-gun       | 16.2<br>(15.2,17.1) | 23.0<br>(20.3,25.8) | 19.6<br>(17.3,21.9) | 13.7<br>(12.0,15.4) | 14.3<br>(12.4,16.2) | 10.4<br>(8.8,12.0)  | 12.6<br>(11.8,21.6) | Rural        |
| Total | Jeollabuk-do      | Muju-gun        | 18.3<br>(17.3,19.3) | 25.6<br>(22.8,28.3) | 20.7<br>(18.3,23.0) | 16.7<br>(14.7,18.7) | 14.9<br>(13.0,16.9) | 13.4<br>(11.5,15.3) | 12.2<br>(7.9,14.7)  | Rural        |
| Total | Jeollabuk-do      | Jangsu-gun      | 18.0<br>(17.0,19.0) | 24.6<br>(21.8,27.4) | 19.7<br>(17.4,21.9) | 16.2<br>(14.3,18.2) | 13.9<br>(12.1,15.8) | 16.0<br>(13.9,18.0) | 8.6<br>(5.7,13.5)   | Rural        |
| Total | Jeollabuk-do      | Imsil-gun       | 17.7<br>(16.7,18.7) | 24.2<br>(21.3,27.1) | 17.2<br>(15.2,19.2) | 22.2<br>(19.7,24.6) | 13.8<br>(11.9,15.7) | 11.0<br>(9.5,12.6)  | 13.2<br>(11.1,18.3) | Rural        |
| Total | Jeollabuk-do      | Sunchang-gun    | 17.7<br>(16.7,18.7) | 25.6<br>(22.8,28.3) | 21.3<br>(18.8,23.8) | 15.6<br>(13.8,17.5) | 13.9<br>(12.0,15.9) | 12.0<br>(10.3,13.8) | 13.6<br>(9.7,16.3)  | Rural        |
| Total | Jeollabuk-do      | Gochang-gun     | 21.8<br>(20.7,22.9) | 31.2<br>(28.0,34.3) | 21.9<br>(19.6,24.2) | 19.5<br>(17.2,21.7) | 20.8<br>(18.4,23.2) | 16.2<br>(14.2,18.3) | 15.0<br>(11.3,18.3) | Rural        |
| Total | Jeollabuk-do      | Buan-gun        | 19.5<br>(18.5,20.5) | 30.8<br>(27.7,33.9) | 20.2<br>(17.9,22.5) | 18.3<br>(16.1,20.5) | 12.9<br>(11.2,14.7) | 15.4<br>(13.3,17.4) | 15.4<br>(11.7,19.1) | Rural        |
| Total | Jeollanam-do      | Mokpo-si        | 17.2<br>(16.2,18.2) | 25.6<br>(22.8,28.4) | 19.5<br>(17.1,21.9) | 16.6<br>(14.4,18.7) | 13.7<br>(11.7,15.6) | 10.9<br>(9.1,12.7)  | 14.7<br>(8.9,15.3)  | Urban        |
| Total | Jeollanam-do      | Yeosu-si        | 16.0<br>(15.1,16.9) | 22.7<br>(20.1,25.2) | 15.7<br>(13.7,17.7) | 14.7<br>(12.7,16.7) | 12.5<br>(10.6,14.3) | 14.6<br>(12.6,16.6) | 8.1<br>(4.8,11.2)   | Urban        |
| Total | Jeollanam-do      | Suncheon-si     | 14.8<br>(13.9,15.8) | 21.7<br>(19.1,24.3) | 17.0<br>(14.9,19.2) | 12.4<br>(10.5,14.3) | 12.7<br>(10.8,14.6) | 10.7<br>(9.0,12.4)  | 11.0<br>(10.1,16.3) | Urban        |



|       |                  |                |                     |                     |                     |                     |                     |                     |                     |              |
|-------|------------------|----------------|---------------------|---------------------|---------------------|---------------------|---------------------|---------------------|---------------------|--------------|
| Total | Jeollanam-do     | Naju-si        | 17.6<br>(16.6,18.5) | 28.2<br>(25.4,31.1) | 18.4<br>(16.3,20.6) | 15.4<br>(13.5,17.4) | 13.6<br>(11.8,15.3) | 12.1<br>(10.4,13.7) | 16.1<br>(13.6,20.2) | Urban        |
| Total | Jeollanam-do     | Gwangyang-si   | 14.3<br>(13.3,15.3) | 21.3<br>(18.6,24.0) | 15.6<br>(13.4,17.8) | 13.0<br>(11.0,15.1) | 11.2<br>(9.3,13.1)  | 10.7<br>(8.8,12.5)  | 10.6<br>(6.8,13.0)  | Urban        |
| Total | Jeollanam-do     | Damyang-gun    | 17.4<br>(16.4,18.3) | 25.6<br>(22.9,28.4) | 18.8<br>(16.6,21.0) | 15.2<br>(13.4,17.0) | 13.9<br>(12.1,15.7) | 13.6<br>(11.7,15.5) | 12.0<br>(10.2,16.6) | Rural        |
| Total | Jeollanam-do     | Gokseong-gun   | 16.8<br>(15.9,17.7) | 22.4<br>(19.8,25.0) | 17.3<br>(15.3,19.3) | 17.1<br>(15.0,19.2) | 13.3<br>(11.6,15.0) | 14.0<br>(12.1,15.9) | 8.4<br>(5.9,12.5)   | Rural        |
| Total | Jeollanam-do     | Gurye-gun      | 13.4<br>(12.6,14.2) | 22.1<br>(19.6,24.7) | 15.7<br>(13.7,17.7) | 10.4<br>(9.0,11.9)  | 10.1<br>(8.6,11.6)  | 9.1<br>(7.6,10.7)   | 13.0<br>(10.3,16.5) | Rural        |
| Total | Jeollanam-do     | Goheung-gun    | 15.6<br>(14.7,16.5) | 28.3<br>(25.1,31.6) | 15.4<br>(13.5,17.3) | 14.8<br>(12.9,16.6) | 11.8<br>(10.2,13.5) | 8.2<br>(7.0,9.5)    | 20.1<br>(18.0,24.0) | Rural        |
| Total | Jeollanam-do     | Boseong-gun    | 18.2<br>(17.2,19.1) | 27.8<br>(24.7,30.8) | 21.0<br>(18.6,23.3) | 17.3<br>(15.2,19.3) | 13.7<br>(11.9,15.5) | 11.2<br>(9.8,12.7)  | 16.6<br>(14.1,20.9) | Rural        |
| Total | Jeollanam-do     | Hwasun-gun     | 18.9<br>(17.9,19.9) | 29.2<br>(26.3,32.1) | 18.4<br>(16.3,20.5) | 18.1<br>(16.0,20.3) | 14.3<br>(12.5,16.2) | 14.7<br>(12.8,16.7) | 14.5<br>(11.0,18.0) | Rural        |
| Total | Jeollanam-do     | Jangheung-gun  | 15.9<br>(15.0,16.8) | 26.4<br>(23.2,29.3) | 16.0<br>(14.1,18.0) | 13.7<br>(11.8,15.5) | 11.3<br>(9.8,12.8)  | 12.7<br>(10.9,14.6) | 13.7<br>(9.8,18.0)  | Rural        |
| Total | Jeollanam-do     | Gangjin-gun    | 14.2<br>(13.3,15.1) | 21.7<br>(19.1,24.3) | 15.1<br>(13.1,17.0) | 12.6<br>(10.8,14.4) | 12.2<br>(10.4,13.9) | 9.8<br>(8.2,11.3)   | 11.9<br>(10.8,18.2) | Rural        |
| Total | Jeollanam-do     | Haenam-gun     | 17.9<br>(16.9,18.8) | 25.8<br>(23.0,28.7) | 17.8<br>(15.7,19.8) | 16.4<br>(14.5,18.3) | 15.4<br>(13.4,17.4) | 14.6<br>(12.7,16.5) | 11.2<br>(8.0,15.4)  | Rural        |
| Total | Jeollanam-do     | Yeongam-gun    | 17.5<br>(16.6,18.5) | 25.9<br>(23.2,28.6) | 19.2<br>(17.0,21.4) | 16.1<br>(14.1,18.1) | 15.0<br>(13.0,16.9) | 11.7<br>(10.1,13.4) | 14.2<br>(10.8,17.2) | Rural        |
| Total | Jeollanam-do     | Muan-gun       | 15.2<br>(14.3,16.1) | 20.3<br>(17.9,22.7) | 15.7<br>(13.7,17.6) | 16.0<br>(14.0,18.0) | 11.8<br>(10.2,13.5) | 12.5<br>(10.6,14.3) | 7.8<br>(6.0,12.2)   | Rural        |
| Total | Jeollanam-do     | Hampyeong-gun  | 19.2<br>(18.2,20.2) | 28.6<br>(25.6,31.6) | 19.7<br>(17.5,22.0) | 17.1<br>(15.0,19.3) | 16.3<br>(14.3,18.4) | 14.3<br>(12.3,16.2) | 14.3<br>(11.6,18.4) | Rural        |
| Total | Jeollanam-do     | Yeonggwang-gun | 19.3<br>(18.3,20.3) | 29.0<br>(26.1,31.8) | 21.7<br>(19.4,24.0) | 17.7<br>(15.6,19.8) | 15.1<br>(13.3,16.9) | 13.4<br>(11.6,15.3) | 15.6<br>(13.8,20.6) | Rural        |
| Total | Jeollanam-do     | Jangseong-gun  | 17.2<br>(16.3,18.2) | 26.0<br>(23.2,28.8) | 18.2<br>(16.1,20.4) | 15.0<br>(13.1,16.9) | 15.0<br>(13.1,16.9) | 12.3<br>(10.6,14.1) | 13.7<br>(6.3,12.9)  | Rural        |
| Total | Jeollanam-do     | Wando-gun      | 17.4<br>(16.5,18.4) | 27.4<br>(24.5,30.2) | 19.3<br>(17.2,21.4) | 14.3<br>(12.5,16.2) | 14.8<br>(13.0,16.6) | 11.4<br>(9.7,13.0)  | 16.0<br>(13.8,20.2) | Rural        |
| Total | Jeollanam-do     | Jindo-gun      | 18.5<br>(17.6,19.5) | 28.4<br>(25.4,31.4) | 20.1<br>(17.8,22.3) | 16.7<br>(14.8,18.7) | 14.6<br>(12.8,16.4) | 13.0<br>(11.2,14.9) | 15.4<br>(12.7,19.3) | Rural        |
| Total | Jeollanam-do     | Sinan-gun      | 19.8<br>(18.7,20.8) | 25.9<br>(23.2,28.6) | 23.3<br>(20.8,25.9) | 17.2<br>(15.1,19.3) | 17.5<br>(15.4,19.5) | 14.7<br>(12.7,16.6) | 11.2<br>(11.8,19.4) | Rural        |
| Total | Gyeongsangbuk-do | Nam-gu         | 17.1<br>(16.1,18.1) | 26.5<br>(23.7,29.3) | 17.7<br>(15.4,19.9) | 15.9<br>(13.7,18.1) | 12.6<br>(10.7,14.6) | 12.8<br>(10.8,14.7) | 13.7<br>(10.1,16.7) | Metropolitan |
| Total | Gyeongsangbuk-do | Buk-gu         | 15.5<br>(14.6,16.5) | 23.3<br>(20.6,26.0) | 15.7<br>(13.6,17.8) | 14.2<br>(12.2,16.2) | 12.7<br>(10.8,14.7) | 11.8<br>(9.9,13.7)  | 11.5<br>(8.1,14.5)  | Metropolitan |
| Total | Gyeongsangbuk-do | Gyeongju-si    | 16.9<br>(16.0,17.9) | 24.4<br>(21.8,27.0) | 17.8<br>(15.6,20.0) | 16.3<br>(14.2,18.3) | 13.9<br>(12.1,15.8) | 12.7<br>(10.9,14.5) | 11.7<br>(8.5,14.9)  | Urban        |
| Total | Gyeongsangbuk-do | Gimcheon-si    | 16.2<br>(15.3,17.2) | 22.4<br>(19.9,24.8) | 17.3<br>(15.3,19.4) | 16.1<br>(14.0,18.1) | 12.7<br>(10.9,14.6) | 12.5<br>(10.6,14.3) | 9.9<br>(6.2,12.6)   | Urban        |
| Total | Gyeongsangbuk-do | Andong-si      | 16.9<br>(15.9,17.8) | 25.6<br>(22.9,28.3) | 18.7<br>(16.5,20.9) | 15.8<br>(13.8,17.7) | 12.6<br>(10.8,14.4) | 12.2<br>(10.5,14.0) | 13.4<br>(8.9,15.3)  | Urban        |
| Total | Gyeongsangbuk-do | Gumi-si        | 17.1<br>(16.2,17.9) | 25.7<br>(23.2,28.0) | 18.2<br>(16.2,20.1) | 15.2<br>(13.4,17.0) | 14.3<br>(12.6,16.1) | 13.3<br>(11.8,14.9) | 12.4<br>(8.5,13.1)  | Urban        |
| Total | Gyeongsangbuk-do | Yeongju-si     | 17.5<br>(16.6,18.5) | 26.5<br>(23.7,29.3) | 18.0<br>(15.9,20.1) | 16.9<br>(14.9,19.0) | 14.2<br>(12.3,16.0) | 12.7<br>(10.9,14.4) | 13.8<br>(9.9,16.5)  | Urban        |
| Total | Gyeongsangbuk-do | Yeongcheon-si  | 19.3<br>(18.3,20.3) | 25.4<br>(22.7,28.1) | 22.3<br>(19.9,24.6) | 17.6<br>(15.5,19.7) | 16.3<br>(14.3,18.4) | 15.0<br>(13.0,17.0) | 10.4<br>(6.7,13.5)  | Urban        |
| Total | Gyeongsangbuk-do | Sangju-si      | 17.1<br>(16.2,18.0) | 24.9<br>(22.3,27.6) | 16.7<br>(14.7,18.6) | 15.9<br>(13.9,17.8) | 14.7<br>(12.8,16.5) | 13.3<br>(11.5,15.2) | 11.6<br>(7.5,13.9)  | Urban        |
| Total | Gyeongsangbuk-do | Mungyeong-si   | 17.5<br>(16.6,18.5) | 23.7<br>(21.2,26.3) | 17.3<br>(15.3,19.4) | 17.9<br>(15.8,19.9) | 15.5<br>(13.6,17.5) | 13.4<br>(11.5,15.2) | 10.3<br>(5.3,12.7)  | Urban        |
| Total | Gyeongsangbuk-do | Gyeongsan-si   | 17.1<br>(16.1,18.1) | 24.2<br>(21.5,27.0) | 18.2<br>(15.9,20.4) | 14.1<br>(12.1,16.1) | 15.8<br>(13.7,18.0) | 13.5<br>(11.5,15.4) | 10.7<br>(6.4,12.8)  | Urban        |
| Total | Gyeongsangbuk-do | Gunwi-gun      | 17.1<br>(16.1,18.0) | 24.4<br>(21.6,27.3) | 18.1<br>(16.1,20.2) | 15.6<br>(13.7,17.5) | 14.8<br>(12.8,16.7) | 12.9<br>(11.1,14.7) | 11.5<br>(5.9,12.7)  | Rural        |
| Total | Gyeongsangbuk-do | Uiseong-gun    | 16.4<br>(15.4,17.3) | 22.2<br>(19.6,24.9) | 17.1<br>(15.0,19.1) | 14.2<br>(12.4,16.1) | 15.3<br>(13.2,17.3) | 13.3<br>(11.4,15.3) | 8.9<br>(4.4,10.8)   | Rural        |
| Total | Gyeongsangbuk-do | Cheongsong-gun | 18.9<br>(17.9,19.9) | 28.0<br>(24.9,31.0) | 19.1<br>(17.0,21.2) | 16.5<br>(14.5,18.5) | 15.5<br>(13.6,17.5) | 15.6<br>(13.5,17.7) | 12.4<br>(9.6,16.4)  | Rural        |
| Total | Gyeongsangbuk-do | Yeongyang-gun  | 20.6<br>(19.5,21.6) | 29.5<br>(26.4,32.5) | 22.9<br>(20.4,25.4) | 19.1<br>(16.8,21.3) | 17.1<br>(15.0,19.2) | 14.6<br>(12.7,16.6) | 14.9<br>(11.2,18.2) | Rural        |
| Total | Gyeongsangbuk-do | Yeongdeok-gun  | 17.6<br>(16.6,18.6) | 27.9<br>(24.8,31.0) | 20.8<br>(18.4,23.3) | 14.8<br>(13.0,16.6) | 13.0<br>(11.2,14.8) | 11.4<br>(9.7,13.1)  | 16.5<br>(11.9,18.3) | Rural        |
| Total | Gyeongsangbuk-do | Cheongdo-gun   | 18.2<br>(17.3,19.2) | 25.3<br>(22.5,28.0) | 17.6<br>(15.5,19.7) | 16.0<br>(14.1,17.9) | 16.9<br>(14.8,19.0) | 15.7<br>(13.7,17.8) | 9.6<br>(4.4,11.2)   | Rural        |
| Total | Gyeongsangbuk-do | Goryeong-gun   | 17.9<br>(16.9,18.8) | 23.8<br>(21.1,26.4) | 17.4<br>(15.3,19.4) | 17.2<br>(15.1,19.4) | 15.3<br>(13.3,17.2) | 15.7<br>(13.6,17.8) | 8.1<br>(4.1,10.9)   | Rural        |

|       |                  |                 |                     |                     |                     |                     |                     |                     |                     |              |
|-------|------------------|-----------------|---------------------|---------------------|---------------------|---------------------|---------------------|---------------------|---------------------|--------------|
| Total | Gyeongsangbuk-do | Seongju-gun     | 12.1<br>(11.3,12.9) | 19.8<br>(17.4,22.2) | 13.0<br>(11.2,14.8) | 9.9<br>(8.3,11.4)   | 9.0<br>(7.5,10.4)   | 8.9<br>(7.4,10.4)   | 10.9<br>(7.5,13.3)  | Rural        |
| Total | Gyeongsangbuk-do | Chilgok-gun     | 17.1<br>(16.1,18.1) | 24.3<br>(21.5,27.2) | 17.4<br>(15.0,19.8) | 17.2<br>(14.9,19.5) | 13.1<br>(11.1,15.1) | 13.9<br>(11.9,16.0) | 10.4<br>(6.5,13.1)  | Rural        |
| Total | Gyeongsangbuk-do | Yecheon-gun     | 18.4<br>(17.3,19.4) | 30.1<br>(26.9,33.3) | 18.6<br>(16.4,20.7) | 17.7<br>(15.4,19.9) | 13.8<br>(12.0,15.6) | 11.8<br>(10.1,13.5) | 18.3<br>(11.4,18.2) | Rural        |
| Total | Gyeongsangbuk-do | Bonghwa-gun     | 19.7<br>(18.7,20.8) | 28.0<br>(25.0,31.0) | 19.8<br>(17.5,22.1) | 19.6<br>(17.3,21.9) | 17.0<br>(15.0,19.1) | 14.4<br>(12.4,16.4) | 13.6<br>(9.4,16.4)  | Rural        |
| Total | Gyeongsangbuk-do | Uljin-gun       | 18.3<br>(17.3,19.3) | 27.2<br>(24.4,30.0) | 19.6<br>(17.5,21.8) | 16.4<br>(14.4,18.3) | 15.5<br>(13.5,17.5) | 13.3<br>(11.5,15.0) | 13.9<br>(10.3,17.1) | Rural        |
| Total | Gyeongsangbuk-do | Ulleung-gun     | 15.7<br>(14.8,16.7) | 22.6<br>(19.9,25.2) | 17.7<br>(15.5,19.9) | 14.3<br>(12.3,16.4) | 12.3<br>(10.4,14.1) | 11.7<br>(9.8,13.6)  | 10.9<br>(8.8,15.6)  | Rural        |
| Total | Gyeongsangnam-do | Changwon-si     | 17.5<br>(16.3,18.7) | 23.3<br>(20.1,26.4) | 18.6<br>(15.9,21.4) | 16.9<br>(14.4,19.4) | 15.9<br>(13.4,18.4) | 13.2<br>(10.9,15.5) | 10.1<br>(6.7,13.3)  | Metropolitan |
| Total | Gyeongsangnam-do | Masan-si        | 14.6<br>(13.7,15.5) | 22.1<br>(19.6,24.7) | 14.0<br>(12.0,15.9) | 13.4<br>(11.4,15.3) | 13.7<br>(11.7,15.7) | 10.1<br>(8.4,11.8)  | 12.0<br>(7.4,13.6)  | Metropolitan |
| Total | Gyeongsangnam-do | Jinju-si        | 15.7<br>(14.7,16.6) | 24.1<br>(21.4,26.7) | 15.1<br>(13.0,17.1) | 15.1<br>(13.0,17.1) | 13.0<br>(11.1,14.9) | 11.4<br>(9.6,13.2)  | 12.7<br>(8.8,15.2)  | Urban        |
| Total | Gyeongsangnam-do | Jinhae-si       | 15.8<br>(14.8,16.8) | 22.0<br>(19.3,24.8) | 16.8<br>(14.5,19.0) | 14.9<br>(12.7,17.1) | 13.4<br>(11.4,15.5) | 12.1<br>(10.2,14.1) | 9.9<br>(6.4,12.8)   | Metropolitan |
| Total | Gyeongsangnam-do | Tongyeong-si    | 19.5<br>(18.5,20.6) | 28.1<br>(25.2,31.0) | 20.8<br>(18.4,23.2) | 17.7<br>(15.5,20.0) | 15.3<br>(13.3,17.4) | 16.0<br>(13.9,18.2) | 12.1<br>(8.5,15.3)  | Urban        |
| Total | Gyeongsangnam-do | Sacheon-si      | 16.8<br>(15.9,17.8) | 25.7<br>(22.9,28.4) | 18.6<br>(16.4,20.9) | 13.7<br>(11.8,15.5) | 13.6<br>(11.8,15.5) | 12.9<br>(11.1,14.8) | 12.8<br>(8.5,15.1)  | Urban        |
| Total | Gyeongsangnam-do | Gimhae-si       | 16.6<br>(15.5,17.7) | 23.1<br>(20.1,26.1) | 16.6<br>(14.3,19.0) | 15.2<br>(12.9,17.5) | 13.8<br>(11.6,16.0) | 15.0<br>(12.7,17.2) | 8.1<br>(4.3,10.9)   | Urban        |
| Total | Gyeongsangnam-do | Miryang-si      | 17.4<br>(16.5,18.4) | 26.6<br>(23.9,29.2) | 19.0<br>(16.8,21.2) | 16.8<br>(14.8,18.8) | 12.9<br>(11.2,14.6) | 12.1<br>(10.4,13.8) | 14.5<br>(12.7,19.1) | Urban        |
| Total | Gyeongsangnam-do | Geoje-si        | 16.4<br>(15.3,17.5) | 21.0<br>(18.3,23.8) | 17.3<br>(14.8,19.8) | 15.8<br>(13.4,18.2) | 13.9<br>(11.7,16.1) | 14.1<br>(11.9,16.4) | 6.9<br>(3.3,9.7)    | Urban        |
| Total | Gyeongsangnam-do | Yangsang-si     | 13.6<br>(12.7,14.6) | 20.7<br>(18.1,23.2) | 14.1<br>(11.9,16.3) | 11.9<br>(10.0,13.8) | 11.0<br>(9.1,12.8)  | 10.9<br>(9.0,12.7)  | 9.8<br>(5.1,11.3)   | Urban        |
| Total | Gyeongsangnam-do | Uiryeong-gun    | 17.5<br>(16.5,18.5) | 23.1<br>(20.4,25.8) | 19.4<br>(17.1,21.7) | 15.0<br>(13.1,16.8) | 15.9<br>(13.8,18.0) | 14.6<br>(12.5,16.6) | 8.5<br>(7.6,14.8)   | Rural        |
| Total | Gyeongsangnam-do | Haman-gun       | 15.8<br>(14.9,16.7) | 22.2<br>(19.7,24.6) | 15.9<br>(13.9,17.9) | 15.0<br>(13.2,16.9) | 12.9<br>(11.1,14.6) | 12.9<br>(11.3,14.9) | 9.1<br>(6.3,12.9)   | Rural        |
| Total | Gyeongsangnam-do | Changnyeong-gun | 18.4<br>(17.5,19.4) | 24.8<br>(22.1,27.5) | 19.7<br>(17.5,21.9) | 16.7<br>(14.7,18.7) | 15.4<br>(13.5,17.3) | 15.8<br>(13.7,17.8) | 9.0<br>(5.2,12.0)   | Rural        |
| Total | Gyeongsangnam-do | Goseong-gun     | 15.9<br>(15.0,16.8) | 22.8<br>(20.2,25.4) | 17.0<br>(15.0,19.1) | 15.1<br>(13.2,17.0) | 13.7<br>(11.8,15.5) | 11.1<br>(9.5,12.8)  | 11.7<br>(8.0,14.2)  | Rural        |
| Total | Gyeongsangnam-do | Namhae-gun      | 21.6<br>(20.5,22.7) | 31.0<br>(27.8,34.2) | 24.2<br>(21.6,26.8) | 19.9<br>(17.6,22.2) | 18.1<br>(15.9,20.3) | 15.3<br>(13.2,17.4) | 15.7<br>(11.7,18.9) | Rural        |
| Total | Gyeongsangnam-do | Hadong-gun      | 21.2<br>(20.1,22.3) | 28.8<br>(25.8,31.8) | 22.7<br>(20.3,25.2) | 20.4<br>(18.1,22.7) | 17.3<br>(15.2,19.3) | 17.2<br>(15.0,19.4) | 11.6<br>(5.5,12.7)  | Rural        |
| Total | Gyeongsangnam-do | Sancheong-gun   | 19.4<br>(18.3,20.4) | 27.9<br>(24.9,30.9) | 21.2<br>(18.9,23.6) | 17.1<br>(15.1,19.0) | 16.7<br>(14.6,18.7) | 14.2<br>(12.3,16.2) | 13.7<br>(10.2,17.0) | Rural        |
| Total | Gyeongsangnam-do | Hamyang-gun     | 19.2<br>(18.2,20.2) | 23.5<br>(20.9,26.2) | 22.3<br>(19.8,24.8) | 18.0<br>(15.8,20.1) | 17.1<br>(15.0,19.2) | 15.3<br>(13.3,17.3) | 8.2<br>(5.5,13.7)   | Rural        |
| Total | Gyeongsangnam-do | Geochang-gun    | 17.0<br>(16.0,17.9) | 25.5<br>(22.8,28.1) | 17.3<br>(15.3,19.4) | 16.3<br>(14.3,18.4) | 13.6<br>(11.8,15.4) | 12.3<br>(10.5,14.0) | 13.2<br>(8.4,15.0)  | Rural        |
| Total | Gyeongsangnam-do | Hapcheon-gun    | 19.2<br>(18.1,20.2) | 26.5<br>(23.6,29.5) | 21.8<br>(19.3,24.3) | 18.6<br>(16.5,20.7) | 14.8<br>(13.0,16.7) | 14.7<br>(12.7,16.7) | 11.8<br>(5.9,13.3)  | Rural        |
| Total | Jeju-do          | Jeju-si         | 15.7<br>(15.1,16.2) | 24.4<br>(22.7,26.0) | 17.6<br>(16.2,19.1) | 13.7<br>(12.5,15.0) | 11.7<br>(10.6,12.8) | 11.6<br>(10.6,12.7) | 12.8<br>(10.9,14.7) | Urban        |
| Total | Jeju-do          | Seogwipo-si     | 16.0<br>(15.5,16.6) | 23.2<br>(21.6,24.8) | 16.7<br>(15.4,18.0) | 14.5<br>(13.3,15.7) | 13.2<br>(12.1,14.3) | 13.0<br>(11.9,14.2) | 10.2<br>(7.0,11.0)  | Urban        |
| Men   | Seoul            | Jongno-gu       | 10.0<br>(8.9,11.2)  | 18.1<br>(14.6,21.5) | 10.7<br>(8.1,13.4)  | 9.6<br>(7.0,12.1)   | 6.4<br>(4.4,8.5)    | 5.7<br>(3.8,7.6)    | 12.4<br>(8.5,16.5)  | Metropolitan |
| Men   | Seoul            | Jung-gu         | 11.1<br>(9.9,12.3)  | 20.1<br>(16.3,23.8) | 11.2<br>(8.5,13.9)  | 9.7<br>(7.2,12.2)   | 8.6<br>(6.3,10.9)   | 6.3<br>(4.3,8.3)    | 13.8<br>(8.8,17.4)  | Metropolitan |
| Men   | Seoul            | Yongsan-gu      | 9.5<br>(8.3,10.7)   | 16.8<br>(13.3,20.2) | 6.8<br>(4.6,8.9)    | 9.1<br>(6.6,11.6)   | 7.9<br>(5.5,10.3)   | 6.7<br>(4.6,8.9)    | 10.1<br>(8.1,16.7)  | Metropolitan |
| Men   | Seoul            | Seongdong-gu    | 10.7<br>(9.4,12.0)  | 12.7<br>(9.6,15.8)  | 10.6<br>(7.9,13.2)  | 11.6<br>(8.5,14.7)  | 10.3<br>(7.7,13.0)  | 8.2<br>(5.7,10.6)   | 4.5<br>(-0.1,7.3)   | Metropolitan |
| Men   | Seoul            | Gwangjin-gu     | 9.9<br>(8.6,11.1)   | 13.0<br>(9.7,16.2)  | 12.1<br>(9.1,15.1)  | 9.3<br>(6.5,12.0)   | 8.8<br>(6.2,11.4)   | 6.3<br>(4.0,8.5)    | 6.7<br>(5.9,12.9)   | Metropolitan |
| Men   | Seoul            | Dongdaemun-gu   | 11.0<br>(9.8,12.3)  | 17.4<br>(13.8,20.9) | 11.9<br>(9.1,14.7)  | 9.0<br>(6.5,11.5)   | 8.1<br>(5.7,10.6)   | 8.7<br>(6.1,11.3)   | 8.7<br>(3.7,11.9)   | Metropolitan |
| Men   | Seoul            | Jungnang-gu     | 11.1<br>(9.9,12.4)  | 18.8<br>(15.0,22.5) | 13.2<br>(10.0,16.3) | 8.6<br>(6.1,11.1)   | 9.9<br>(7.2,12.7)   | 5.5<br>(3.3,7.6)    | 13.3<br>(10.3,18.7) | Metropolitan |
| Men   | Seoul            | Seongbuk-gu     | 10.4<br>(9.2,11.6)  | 19.0<br>(15.3,22.7) | 9.8<br>(7.2,12.4)   | 7.3<br>(5.1,9.5)    | 9.0<br>(6.4,11.6)   | 7.5<br>(5.2,9.8)    | 11.5<br>(8.1,16.7)  | Metropolitan |
| Men   | Seoul            | Gangbuk-gu      | 12.0<br>(10.8,13.3) | 17.7<br>(14.2,21.3) | 13.8<br>(10.7,16.8) | 12.4<br>(9.5,15.3)  | 8.4<br>(6.0,10.7)   | 7.7<br>(5.4,10.0)   | 10.0<br>(6.2,15.0)  | Metropolitan |

|     |       |                 |                     |                     |                     |                     |                     |                    |                     |              |
|-----|-------|-----------------|---------------------|---------------------|---------------------|---------------------|---------------------|--------------------|---------------------|--------------|
| Men | Seoul | Dobong-gu       | 11.5<br>(10.2,12.8) | 18.4<br>(14.8,22.1) | 11.2<br>(8.4,14.1)  | 11.7<br>(8.8,14.5)  | 9.0<br>(6.5,11.4)   | 7.7<br>(5.3,10.0)  | 10.7<br>(6.7,15.7)  | Metropolitan |
| Men | Seoul | Nowon-gu        | 11.3<br>(9.9,12.6)  | 21.2<br>(17.1,25.4) | 11.5<br>(8.6,14.3)  | 10.6<br>(7.6,13.6)  | 7.9<br>(5.4,10.5)   | 5.4<br>(3.4,7.5)   | 15.8<br>(9.6,18.0)  | Metropolitan |
| Men | Seoul | Eunpyeong-gu    | 12.0<br>(10.7,13.3) | 18.8<br>(15.1,22.6) | 13.4<br>(10.3,16.4) | 11.4<br>(8.6,14.1)  | 10.3<br>(7.6,13.0)  | 6.0<br>(3.9,8.1)   | 12.8<br>(7.8,16.2)  | Metropolitan |
| Men | Seoul | Seodaemun-gu    | 11.2<br>(9.9,12.4)  | 16.6<br>(13.2,20.1) | 12.9<br>(9.9,15.9)  | 10.6<br>(7.8,13.4)  | 9.6<br>(7.1,12.1)   | 6.1<br>(4.0,8.2)   | 10.5<br>(4.9,13.1)  | Metropolitan |
| Men | Seoul | Mapo-gu         | 9.3<br>(8.1,10.5)   | 13.7<br>(10.4,17.0) | 11.8<br>(8.8,14.9)  | 10.2<br>(7.5,13.0)  | 6.3<br>(4.1,8.4)    | 4.9<br>(3.0,6.9)   | 8.8<br>(2.6,10.8)   | Metropolitan |
| Men | Seoul | Yangcheon-gu    | 11.0<br>(9.6,12.3)  | 20.6<br>(16.4,24.8) | 12.3<br>(9.3,15.3)  | 8.0<br>(5.3,10.6)   | 7.2<br>(4.7,9.7)    | 7.2<br>(4.7,9.7)   | 13.4<br>(6.6,15.4)  | Metropolitan |
| Men | Seoul | Gangseo-gu      | 12.4<br>(11.0,13.8) | 20.4<br>(16.3,24.5) | 14.0<br>(10.8,17.2) | 10.5<br>(7.6,13.4)  | 9.9<br>(7.1,12.7)   | 7.5<br>(5.1,10.0)  | 12.9<br>(5.1,13.5)  | Metropolitan |
| Men | Seoul | Guro-gu         | 11.9<br>(10.5,13.2) | 21.6<br>(17.6,25.7) | 9.9<br>(7.2,12.6)   | 11.0<br>(8.1,13.9)  | 9.3<br>(6.7,11.8)   | 7.7<br>(5.2,10.2)  | 13.9<br>(9.1,17.7)  | Metropolitan |
| Men | Seoul | Geumcheon-gu    | 11.6<br>(10.3,12.9) | 18.0<br>(14.4,21.6) | 11.4<br>(8.6,14.2)  | 11.5<br>(8.7,14.3)  | 7.7<br>(5.4,10.0)   | 9.7<br>(7.1,12.4)  | 8.3<br>(2.7,11.1)   | Metropolitan |
| Men | Seoul | Yeongdeungpo-gu | 11.9<br>(10.6,13.2) | 19.3<br>(15.6,23.1) | 12.0<br>(9.0,14.9)  | 11.0<br>(8.2,13.8)  | 8.9<br>(6.4,11.5)   | 8.3<br>(5.8,10.8)  | 11.0<br>(5.9,14.3)  | Metropolitan |
| Men | Seoul | Dongjak-gu      | 11.6<br>(10.3,12.9) | 17.4<br>(13.7,21.0) | 11.1<br>(8.2,14.0)  | 10.1<br>(7.5,12.7)  | 10.4<br>(7.7,13.1)  | 9.4<br>(6.8,12.1)  | 8.0<br>(2.0,10.4)   | Metropolitan |
| Men | Seoul | Gwanak-gu       | 11.7<br>(10.3,13.0) | 16.3<br>(12.7,19.9) | 13.4<br>(10.1,16.7) | 11.1<br>(8.3,13.9)  | 8.4<br>(5.8,11.0)   | 9.8<br>(6.9,12.6)  | 6.5<br>(5.0,13.2)   | Metropolitan |
| Men | Seoul | Seocho-gu       | 7.5<br>(6.4,8.6)    | 10.9<br>(8.0,13.9)  | 9.2<br>(6.5,11.8)   | 7.0<br>(4.7,9.3)    | 5.1<br>(3.2,7.1)    | 5.3<br>(3.1,7.5)   | 5.6<br>(4.2,11.2)   | Metropolitan |
| Men | Seoul | Gangnam-gu      | 7.8<br>(6.6,8.9)    | 11.6<br>(8.3,15.0)  | 7.4<br>(4.8,9.9)    | 7.7<br>(5.2,10.2)   | 6.5<br>(4.1,8.9)    | 5.9<br>(3.5,8.3)   | 5.7<br>(3.0,10.6)   | Metropolitan |
| Men | Seoul | Songpa-gu       | 7.8<br>(6.6,8.9)    | 12.9<br>(9.6,16.3)  | 8.0<br>(5.3,10.7)   | 6.8<br>(4.3,9.2)    | 7.2<br>(4.8,9.6)    | 4.0<br>(2.2,5.7)   | 8.9<br>(5.9,13.1)   | Metropolitan |
| Men | Seoul | Gangdong-gu     | 11.5<br>(10.1,12.9) | 17.1<br>(13.4,20.8) | 13.5<br>(10.4,16.7) | 9.8<br>(6.9,12.6)   | 8.8<br>(6.1,11.5)   | 8.2<br>(5.4,11.0)  | 8.9<br>(5.9,14.3)   | Metropolitan |
| Men | Busan | Jung-gu         | 12.8<br>(11.5,14.1) | 21.5<br>(17.7,25.4) | 13.3<br>(10.5,16.2) | 13.2<br>(10.2,16.1) | 8.8<br>(6.4,11.1)   | 7.7<br>(5.5,9.9)   | 13.8<br>(10.0,19.0) | Metropolitan |
| Men | Busan | Seo-gu          | 13.5<br>(12.2,14.8) | 23.0<br>(19.1,26.8) | 14.5<br>(11.5,17.4) | 10.2<br>(7.7,12.7)  | 9.8<br>(7.4,12.3)   | 10.0<br>(7.5,12.5) | 9.8<br>(7.6,16.8)   | Metropolitan |
| Men | Busan | Dong-gu         | 16.0<br>(14.6,17.5) | 26.7<br>(22.4,30.9) | 15.3<br>(12.1,18.5) | 13.2<br>(10.3,16.1) | 13.1<br>(10.2,16.0) | 12.2<br>(9.4,15.1) | 14.5<br>(8.8,18.6)  | Metropolitan |
| Men | Busan | Yeongdo-gu      | 16.1<br>(14.7,17.6) | 27.8<br>(23.5,32.1) | 17.3<br>(14.1,20.5) | 13.6<br>(10.6,16.5) | 11.6<br>(9.0,14.2)  | 11.1<br>(8.5,13.7) | 16.7<br>(10.4,20.2) | Metropolitan |
| Men | Busan | Busanjin-gu     | 11.9<br>(10.6,13.1) | 20.0<br>(16.3,23.7) | 14.2<br>(11.2,17.3) | 10.4<br>(7.6,13.2)  | 8.6<br>(6.1,11.0)   | 5.8<br>(3.8,7.9)   | 14.2<br>(9.6,17.8)  | Metropolitan |
| Men | Busan | Dongnae-gu      | 11.3<br>(10.0,12.5) | 15.8<br>(12.6,19.0) | 11.6<br>(8.6,14.5)  | 9.7<br>(7.2,12.3)   | 9.3<br>(6.8,11.8)   | 9.7<br>(7.0,12.3)  | 6.1<br>(4.7,12.7)   | Metropolitan |
| Men | Busan | Nam-gu          | 11.2<br>(9.9,12.4)  | 17.0<br>(13.6,20.4) | 11.8<br>(9.0,14.6)  | 10.2<br>(7.5,12.8)  | 9.0<br>(6.6,11.5)   | 7.9<br>(5.5,10.3)  | 9.1<br>(6.7,14.7)   | Metropolitan |
| Men | Busan | Buk-gu          | 12.1<br>(10.7,13.5) | 20.8<br>(16.9,24.8) | 10.6<br>(7.5,13.6)  | 10.9<br>(8.0,13.7)  | 8.2<br>(5.7,10.7)   | 10.1<br>(7.1,13.0) | 10.7<br>(9.0,17.8)  | Metropolitan |
| Men | Busan | Haeundae-gu     | 11.8<br>(10.5,13.1) | 24.7<br>(20.4,29.0) | 10.9<br>(8.1,13.7)  | 10.1<br>(7.4,12.8)  | 8.6<br>(6.1,11.2)   | 5.3<br>(3.2,7.3)   | 19.4<br>(13.6,22.2) | Metropolitan |
| Men | Busan | Saha-gu         | 12.7<br>(11.4,14.1) | 21.5<br>(17.5,25.5) | 12.7<br>(9.6,15.8)  | 9.7<br>(7.1,12.4)   | 9.8<br>(7.1,12.5)   | 10.1<br>(7.3,13.0) | 11.4<br>(6.7,15.7)  | Metropolitan |
| Men | Busan | Geumjeong-gu    | 10.9<br>(9.6,12.1)  | 20.0<br>(16.2,23.9) | 11.5<br>(8.6,14.3)  | 8.4<br>(6.1,10.7)   | 7.4<br>(5.2,9.7)    | 7.9<br>(5.5,10.3)  | 12.1<br>(10.2,18.4) | Metropolitan |
| Men | Busan | Gangseo-gu      | 14.0<br>(12.7,15.3) | 21.1<br>(17.4,24.8) | 13.4<br>(10.5,16.2) | 13.7<br>(10.7,16.6) | 11.4<br>(8.7,14.2)  | 10.5<br>(7.9,13.2) | 10.6<br>(4.5,13.5)  | Metropolitan |
| Men | Busan | Yeonje-gu       | 12.5<br>(11.1,13.8) | 21.7<br>(17.8,25.6) | 11.1<br>(8.4,13.8)  | 10.3<br>(7.6,13.0)  | 8.5<br>(6.2,10.9)   | 11.1<br>(8.2,14.0) | 10.6<br>(5.2,14.2)  | Metropolitan |
| Men | Busan | Suyeong-gu      | 10.9<br>(9.8,12.1)  | 17.5<br>(14.1,20.8) | 11.1<br>(8.4,13.9)  | 8.2<br>(6.0,10.5)   | 10.2<br>(7.6,12.8)  | 7.8<br>(5.4,10.1)  | 9.7<br>(5.9,14.3)   | Metropolitan |
| Men | Busan | Sasang-gu       | 13.5<br>(12.0,14.9) | 18.8<br>(15.1,22.6) | 12.2<br>(9.2,15.3)  | 12.5<br>(9.4,15.6)  | 12.2<br>(9.2,15.2)  | 11.9<br>(8.8,15.0) | 6.9<br>(1.0,9.8)    | Metropolitan |
| Men | Busan | Gijang-gun      | 15.0<br>(13.5,16.4) | 21.3<br>(17.4,25.1) | 15.7<br>(12.3,19.1) | 15.2<br>(12.0,18.3) | 13.9<br>(10.8,17.0) | 9.2<br>(6.6,11.7)  | 12.1<br>(5.2,14.2)  | Rural        |
| Men | Daegu | Jung-gu         | 15.8<br>(14.4,17.3) | 24.0<br>(19.8,28.1) | 17.7<br>(14.5,21.0) | 14.8<br>(11.7,18.0) | 12.0<br>(9.2,14.7)  | 10.8<br>(8.0,13.5) | 13.2<br>(7.1,16.3)  | Metropolitan |
| Men | Daegu | Dong-gu         | 15.7<br>(14.3,17.2) | 22.8<br>(18.7,26.9) | 18.2<br>(14.8,21.6) | 13.9<br>(10.9,16.8) | 13.5<br>(10.5,16.6) | 10.6<br>(7.9,13.3) | 12.2<br>(7.9,16.9)  | Metropolitan |
| Men | Daegu | Seo-gu          | 15.1<br>(13.7,16.6) | 21.0<br>(17.4,24.8) | 16.6<br>(13.0,20.1) | 13.6<br>(10.5,16.6) | 14.0<br>(10.8,17.2) | 10.4<br>(7.6,13.1) | 10.6<br>(7.0,15.6)  | Metropolitan |
| Men | Daegu | Nam-gu          | 13.1<br>(11.7,14.4) | 21.1<br>(17.2,25.0) | 13.7<br>(10.7,16.8) | 11.6<br>(8.8,14.4)  | 10.4<br>(7.8,12.9)  | 9.0<br>(6.5,11.5)  | 12.1<br>(7.7,16.5)  | Metropolitan |
| Men | Daegu | Buk-gu          | 12.5<br>(11.2,13.9) | 20.8<br>(16.7,24.9) | 13.6<br>(10.3,16.8) | 11.8<br>(8.9,14.7)  | 8.7<br>(6.2,11.3)   | 8.4<br>(5.8,10.9)  | 12.4<br>(10.1,18.5) | Metropolitan |

|     |             |              |                     |                     |                     |                     |                    |                    |                     |              |
|-----|-------------|--------------|---------------------|---------------------|---------------------|---------------------|--------------------|--------------------|---------------------|--------------|
| Men | Daegu       | Suseong-gu   | 11.7<br>(10.4,13.0) | 19.1<br>(15.4,22.8) | 12.1<br>(9.2,15.1)  | 11.0<br>(8.3,13.7)  | 9.0<br>(6.5,11.6)  | 7.3<br>(5.0,9.7)   | 11.8<br>(6.1,14.3)  | Metropolitan |
| Men | Daegu       | Dalseo-gu    | 13.1<br>(11.7,14.5) | 21.7<br>(17.6,25.7) | 16.0<br>(12.3,19.7) | 10.1<br>(7.4,12.9)  | 9.4<br>(6.7,12.2)  | 8.4<br>(5.8,10.9)  | 13.3<br>(7.7,16.5)  | Metropolitan |
| Men | Daegu       | Dalseong-gun | 14.2<br>(12.8,15.6) | 18.1<br>(14.4,21.7) | 16.1<br>(12.6,19.6) | 14.7<br>(11.6,17.8) | 12.2<br>(9.1,15.2) | 9.9<br>(7.2,12.7)  | 8.2<br>(7.9,16.3)   | Rural        |
| Men | Incheon     | Jung-gu      | 12.2<br>(10.9,13.5) | 18.3<br>(14.7,22.0) | 13.5<br>(10.6,16.4) | 12.0<br>(9.1,14.9)  | 9.6<br>(7.1,12.2)  | 7.7<br>(5.4,10.1)  | 10.6<br>(5.7,14.1)  | Metropolitan |
| Men | Incheon     | Dong-gu      | 12.1<br>(10.9,13.4) | 18.6<br>(15.0,22.2) | 12.9<br>(9.9,16.0)  | 13.2<br>(10.3,16.0) | 8.2<br>(5.9,10.5)  | 8.2<br>(5.8,10.5)  | 10.4<br>(5.9,14.1)  | Metropolitan |
| Men | Incheon     | Nam-gu       | 10.3<br>(9.1,11.5)  | 17.6<br>(13.9,21.2) | 8.7<br>(6.1,11.2)   | 8.7<br>(6.3,11.1)   | 8.4<br>(5.9,10.8)  | 8.7<br>(6.2,11.2)  | 8.9<br>(2.4,10.6)   | Metropolitan |
| Men | Incheon     | Yeonsu-gu    | 11.9<br>(10.4,13.4) | 15.8<br>(12.0,19.7) | 12.4<br>(8.9,15.9)  | 10.5<br>(7.4,13.5)  | 10.0<br>(6.9,13.1) | 11.0<br>(7.6,14.3) | 4.8<br>(0.4,9.2)    | Metropolitan |
| Men | Incheon     | Namdong-gu   | 12.2<br>(10.7,13.7) | 18.9<br>(14.8,23.1) | 12.3<br>(8.8,15.7)  | 11.7<br>(8.4,14.9)  | 7.5<br>(4.9,10.1)  | 10.7<br>(7.6,13.8) | 8.2<br>(7.8,16.8)   | Metropolitan |
| Men | Incheon     | Bupyeong-gu  | 14.3<br>(12.8,15.9) | 24.2<br>(19.4,28.8) | 13.8<br>(10.4,17.2) | 13.7<br>(10.5,17.0) | 10.7<br>(7.7,13.6) | 9.8<br>(6.8,12.7)  | 14.4<br>(10.1,19.5) | Metropolitan |
| Men | Incheon     | Gyeyang-gu   | 14.1<br>(12.4,15.8) | 21.2<br>(16.5,25.9) | 14.6<br>(10.7,18.6) | 13.4<br>(9.9,16.9)  | 11.1<br>(7.7,14.5) | 10.8<br>(7.4,14.1) | 10.4<br>(5.2,14.8)  | Metropolitan |
| Men | Incheon     | Seo-gu       | 12.8<br>(11.3,14.4) | 18.8<br>(14.5,23.0) | 11.4<br>(8.2,14.5)  | 12.1<br>(8.8,15.4)  | 11.6<br>(8.3,14.9) | 10.5<br>(7.4,13.6) | 8.3<br>(5.7,14.3)   | Metropolitan |
| Men | Incheon     | Ganghwa-gun  | 13.5<br>(12.2,14.8) | 20.5<br>(16.8,24.2) | 15.9<br>(12.8,18.9) | 10.9<br>(8.5,13.3)  | 9.4<br>(7.1,11.7)  | 10.9<br>(8.3,13.4) | 9.6<br>(3.0,12.2)   | Rural        |
| Men | Incheon     | Ongjin-gun   | 10.8<br>(9.7,12.0)  | 15.5<br>(12.3,18.8) | 9.8<br>(7.4,12.2)   | 10.2<br>(7.6,12.8)  | 9.5<br>(7.1,12.0)  | 9.0<br>(6.6,11.4)  | 6.5<br>(3.6,11.8)   | Rural        |
| Men | Gwangju     | Dong-gu      | 13.0<br>(11.7,14.3) | 21.1<br>(17.3,24.9) | 15.2<br>(12.1,18.4) | 9.9<br>(7.5,12.3)   | 10.4<br>(7.8,13.0) | 8.8<br>(6.3,11.2)  | 12.3<br>(8.5,17.3)  | Metropolitan |
| Men | Gwangju     | Seo-gu       | 10.8<br>(9.4,12.1)  | 15.3<br>(11.9,18.8) | 12.6<br>(9.2,15.9)  | 11.1<br>(8.1,14.0)  | 7.6<br>(5.2,10.0)  | 7.8<br>(5.2,10.4)  | 7.5<br>(5.6,13.0)   | Metropolitan |
| Men | Gwangju     | Nam-gu       | 12.9<br>(11.6,14.2) | 21.3<br>(17.4,25.1) | 15.1<br>(12.0,18.2) | 9.7<br>(7.1,12.3)   | 9.0<br>(6.6,11.4)  | 9.8<br>(7.3,12.4)  | 11.5<br>(7.0,15.8)  | Metropolitan |
| Men | Gwangju     | Buk-gu       | 13.5<br>(12.1,14.9) | 19.3<br>(15.4,23.1) | 13.7<br>(10.6,16.9) | 11.6<br>(8.6,14.6)  | 12.0<br>(8.9,15.0) | 10.9<br>(8.0,13.8) | 8.4<br>(5.0,13.6)   | Metropolitan |
| Men | Gwangju     | Gwangsan-gu  | 12.8<br>(11.2,14.3) | 21.1<br>(16.6,25.5) | 14.9<br>(11.2,18.6) | 11.0<br>(7.8,14.2)  | 8.2<br>(5.4,11.0)  | 8.8<br>(5.8,11.8)  | 12.3<br>(9.1,17.7)  | Metropolitan |
| Men | Daejeon     | Dong-gu      | 12.7<br>(11.3,14.0) | 25.1<br>(20.9,29.3) | 12.2<br>(9.3,15.0)  | 9.2<br>(6.7,11.7)   | 8.1<br>(5.6,10.5)  | 8.9<br>(6.4,11.4)  | 16.2<br>(9.2,18.2)  | Metropolitan |
| Men | Daejeon     | Jung-gu      | 11.3<br>(10.0,12.5) | 18.6<br>(14.9,22.3) | 12.0<br>(9.2,14.9)  | 10.1<br>(7.4,12.9)  | 9.5<br>(7.0,11.9)  | 6.5<br>(4.4,8.7)   | 12.1<br>(6.5,15.1)  | Metropolitan |
| Men | Daejeon     | Seo-gu       | 11.4<br>(10.0,12.8) | 18.7<br>(14.5,22.8) | 13.4<br>(10.3,16.5) | 10.8<br>(7.7,13.9)  | 8.5<br>(5.9,11.2)  | 6.5<br>(4.2,8.8)   | 12.2<br>(8.9,16.9)  | Metropolitan |
| Men | Daejeon     | Yuseong-gu   | 10.4<br>(9.0,11.8)  | 15.5<br>(11.9,19.1) | 12.4<br>(8.9,15.8)  | 8.9<br>(6.1,11.7)   | 7.2<br>(4.5,9.8)   | 7.1<br>(4.3,9.8)   | 8.4<br>(4.0,12.0)   | Metropolitan |
| Men | Daejeon     | Daedeok-gu   | 11.0<br>(9.7,12.4)  | 16.7<br>(13.0,20.5) | 13.0<br>(9.9,16.1)  | 8.8<br>(6.1,11.6)   | 9.4<br>(6.5,12.2)  | 7.2<br>(4.6,9.8)   | 9.5<br>(5.9,14.1)   | Metropolitan |
| Men | Ulsan       | Jung-gu      | 13.9<br>(12.4,15.4) | 20.8<br>(16.8,24.7) | 13.0<br>(9.7,16.4)  | 11.7<br>(8.5,14.9)  | 11.9<br>(8.9,14.8) | 11.9<br>(8.8,15.0) | 8.9<br>(7.1,16.1)   | Metropolitan |
| Men | Ulsan       | Nam-gu       | 10.4<br>(9.0,11.8)  | 13.9<br>(10.1,17.8) | 10.8<br>(7.6,13.9)  | 11.1<br>(7.9,14.2)  | 8.9<br>(5.9,11.9)  | 7.9<br>(5.3,10.4)  | 6.0<br>(2.5,9.9)    | Metropolitan |
| Men | Ulsan       | Dong-gu      | 10.0<br>(8.6,11.4)  | 17.3<br>(13.1,21.4) | 10.5<br>(7.2,13.8)  | 8.8<br>(6.0,11.5)   | 6.6<br>(4.1,9.0)   | 7.6<br>(4.7,10.5)  | 9.7<br>(6.6,14.0)   | Metropolitan |
| Men | Ulsan       | Buk-gu       | 10.3<br>(8.8,11.8)  | 14.4<br>(10.5,18.4) | 11.9<br>(8.3,15.4)  | 9.3<br>(6.0,12.5)   | 7.5<br>(4.6,10.4)  | 8.8<br>(5.5,12.0)  | 5.6<br>(2.6,10.2)   | Metropolitan |
| Men | Ulsan       | Ulju-gun     | 14.9<br>(13.4,16.3) | 23.9<br>(19.6,28.2) | 16.1<br>(12.7,19.6) | 12.6<br>(9.6,15.6)  | 10.0<br>(7.3,12.8) | 12.2<br>(9.2,15.2) | 11.7<br>(5.5,14.9)  | Rural        |
| Men | Sejong      | Sejong       | 15.1<br>(13.7,16.5) | 24.3<br>(20.2,28.4) | 14.8<br>(11.8,17.8) | 15.0<br>(11.9,18.1) | 11.6<br>(8.9,14.2) | 9.9<br>(7.3,12.5)  | 14.4<br>(9.3,18.5)  | Metropolitan |
| Men | Gyeonggi-do | Jangan-gu    | 10.8<br>(9.5,12.2)  | 18.2<br>(14.2,22.2) | 12.5<br>(9.3,15.7)  | 10.0<br>(7.3,12.6)  | 7.2<br>(4.8,9.7)   | 6.3<br>(3.9,8.6)   | 11.9<br>(8.1,16.5)  | Metropolitan |
| Men | Gyeonggi-do | Gwonseon-gu  | 10.7<br>(9.3,12.1)  | 17.4<br>(13.4,21.5) | 9.9<br>(6.9,13.0)   | 10.7<br>(7.7,13.7)  | 8.6<br>(5.9,11.3)  | 6.9<br>(4.3,9.5)   | 10.5<br>(7.0,14.8)  | Metropolitan |
| Men | Gyeonggi-do | Paldal-gu    | 11.0<br>(9.7,12.4)  | 16.2<br>(12.6,19.9) | 11.3<br>(8.4,14.2)  | 8.5<br>(5.9,11.2)   | 9.6<br>(6.9,12.3)  | 9.6<br>(6.8,12.3)  | 6.6<br>(1.2,11.0)   | Metropolitan |
| Men | Gyeonggi-do | Yeongtong-gu | 9.6<br>(8.1,11.2)   | 11.9<br>(8.1,15.7)  | 9.9<br>(6.3,13.5)   | 8.2<br>(5.2,11.1)   | 8.9<br>(5.6,12.1)  | 9.0<br>(5.3,12.6)  | 2.9<br>(-1.1,6.5)   | Metropolitan |
| Men | Gyeonggi-do | Sujeong-gu   | 13.5<br>(12.0,14.9) | 20.4<br>(16.4,24.3) | 14.3<br>(11.0,17.5) | 12.7<br>(9.6,15.9)  | 10.0<br>(7.3,12.6) | 10.1<br>(7.3,12.9) | 10.3<br>(5.9,14.5)  | Metropolitan |
| Men | Gyeonggi-do | Jungwon-gu   | 13.5<br>(12.0,14.9) | 22.9<br>(18.7,27.0) | 13.2<br>(10.1,16.4) | 11.7<br>(8.7,14.8)  | 10.1<br>(7.3,12.9) | 9.7<br>(7.0,12.4)  | 13.2<br>(7.1,16.1)  | Metropolitan |
| Men | Gyeonggi-do | Bundang-gu   | 6.2<br>(5.2,7.2)    | 9.1<br>(6.4,11.8)   | 5.1<br>(3.1,7.1)    | 6.4<br>(4.2,8.6)    | 5.3<br>(3.3,7.4)   | 5.2<br>(3.1,7.3)   | 3.9<br>(-0.3,5.7)   | Metropolitan |
| Men | Gyeonggi-do | Uijeongbu-si | 12.6<br>(11.2,14.0) | 20.0<br>(16.0,24.0) | 13.0<br>(9.8,16.2)  | 10.9<br>(8.0,13.7)  | 9.7<br>(7.1,12.4)  | 9.7<br>(7.0,12.5)  | 10.3<br>(4.6,13.6)  | Urban        |

|     |             |                |                     |                     |                     |                     |                    |                    |                    |              |
|-----|-------------|----------------|---------------------|---------------------|---------------------|---------------------|--------------------|--------------------|--------------------|--------------|
| Men | Gyeonggi-do | Manan-gu       | 10.7<br>(9.4,11.9)  | 17.6<br>(14.0,21.3) | 13.2<br>(10.1,16.3) | 9.1<br>(6.5,11.7)   | 7.2<br>(4.8,9.5)   | 6.3<br>(4.1,8.6)   | 11.3<br>(7.3,15.3) | Metropolitan |
| Men | Gyeonggi-do | Dongan-gu      | 9.2<br>(7.9,10.5)   | 13.7<br>(10.0,17.4) | 8.3<br>(5.4,11.1)   | 8.6<br>(6.0,11.3)   | 6.2<br>(3.9,8.5)   | 9.4<br>(6.5,12.3)  | 4.3<br>(0.1,7.7)   | Metropolitan |
| Men | Gyeonggi-do | Wonmi-gu       | 11.2<br>(9.8,12.7)  | 16.2<br>(12.3,20.0) | 11.5<br>(8.3,14.7)  | 8.5<br>(5.7,11.4)   | 9.8<br>(6.9,12.7)  | 10.3<br>(7.1,13.4) | 5.9<br>(2.2,10.8)  | Metropolitan |
| Men | Gyeonggi-do | Sosa-gu        | 11.7<br>(10.3,13.1) | 17.2<br>(13.3,21.1) | 12.7<br>(9.6,15.8)  | 9.6<br>(6.9,12.4)   | 10.2<br>(7.4,13.1) | 9.2<br>(6.4,12.1)  | 8.0<br>(5.8,14.4)  | Metropolitan |
| Men | Gyeonggi-do | Ojeong-gu      | 12.5<br>(11.1,13.9) | 21.8<br>(17.7,26.0) | 11.4<br>(8.4,14.5)  | 9.7<br>(6.9,12.4)   | 9.8<br>(7.0,12.6)  | 9.8<br>(6.8,12.8)  | 12.0<br>(6.5,15.3) | Metropolitan |
| Men | Gyeonggi-do | Gwangmyeong-si | 11.2<br>(9.9,12.5)  | 13.9<br>(10.4,17.3) | 11.9<br>(8.9,14.9)  | 11.7<br>(8.6,14.7)  | 8.9<br>(6.2,11.6)  | 10.0<br>(7.1,12.9) | 3.9<br>(2.0,10.4)  | Urban        |
| Men | Gyeonggi-do | Pyeongtaek-si  | 12.0<br>(11.1,12.9) | 19.2<br>(16.6,21.8) | 12.5<br>(10.3,14.6) | 10.0<br>(8.1,11.9)  | 9.8<br>(7.9,11.7)  | 8.7<br>(6.9,10.4)  | 10.5<br>(8.5,14.5) | Urban        |
| Men | Gyeonggi-do | Dongducheon-si | 13.2<br>(11.8,14.5) | 19.5<br>(15.8,23.2) | 15.0<br>(11.8,18.2) | 13.6<br>(10.7,16.5) | 9.2<br>(6.7,11.8)  | 8.8<br>(6.4,11.2)  | 10.7<br>(6.9,15.7) | Urban        |
| Men | Gyeonggi-do | Sangnok-gu     | 11.1<br>(9.7,12.5)  | 18.2<br>(14.1,22.2) | 10.0<br>(6.9,13.1)  | 9.0<br>(6.0,11.9)   | 9.5<br>(6.6,12.3)  | 8.6<br>(5.8,11.4)  | 9.6<br>(7.9,16.5)  | Metropolitan |
| Men | Gyeonggi-do | Danwon-gu      | 11.7<br>(10.2,13.2) | 17.9<br>(13.6,22.2) | 12.4<br>(9.1,15.8)  | 10.2<br>(7.1,13.3)  | 9.6<br>(6.5,12.6)  | 8.7<br>(5.7,11.6)  | 9.2<br>(3.5,11.7)  | Metropolitan |
| Men | Gyeonggi-do | Deogyang-gu    | 12.8<br>(11.4,14.1) | 21.8<br>(17.7,25.9) | 13.2<br>(10.2,16.3) | 9.5<br>(6.9,12.2)   | 9.2<br>(6.6,11.8)  | 10.3<br>(7.5,13.2) | 11.5<br>(5.1,13.9) | Metropolitan |
| Men | Gyeonggi-do | Ilsandong-gu   | 9.4<br>(8.2,10.7)   | 13.5<br>(10.0,17.1) | 10.1<br>(7.3,13.0)  | 10.1<br>(7.3,12.9)  | 8.0<br>(5.5,10.5)  | 5.8<br>(3.5,8.2)   | 7.7<br>(4.3,12.1)  | Metropolitan |
| Men | Gyeonggi-do | Ilsanseo-gu    | 9.5<br>(8.3,10.8)   | 15.5<br>(11.9,19.1) | 8.7<br>(5.9,11.4)   | 9.5<br>(6.9,12.1)   | 7.5<br>(5.1,9.9)   | 6.8<br>(4.5,9.1)   | 8.7<br>(2.6,10.6)  | Metropolitan |
| Men | Gyeonggi-do | Gwacheon-si    | 8.8<br>(7.6,9.9)    | 13.3<br>(9.9,16.7)  | 8.4<br>(5.9,10.9)   | 7.6<br>(5.1,10.0)   | 8.9<br>(6.3,11.4)  | 5.8<br>(3.7,7.9)   | 7.5<br>(3.2,10.6)  | Urban        |
| Men | Gyeonggi-do | Guri-si        | 13.2<br>(11.7,14.7) | 19.9<br>(15.8,23.9) | 13.8<br>(10.5,17.1) | 10.7<br>(7.7,13.6)  | 12.5<br>(9.4,15.7) | 9.0<br>(6.2,11.8)  | 10.9<br>(4.4,13.4) | Urban        |
| Men | Gyeonggi-do | Namyangju-si   | 13.1<br>(11.7,14.5) | 18.7<br>(14.9,22.5) | 13.0<br>(9.9,16.1)  | 11.8<br>(8.8,14.8)  | 11.6<br>(8.5,14.6) | 10.5<br>(7.5,13.4) | 8.2<br>(4.0,12.8)  | Urban        |
| Men | Gyeonggi-do | Osan-si        | 11.4<br>(9.9,12.9)  | 15.8<br>(11.8,19.8) | 10.4<br>(7.4,13.5)  | 10.5<br>(7.4,13.6)  | 12.5<br>(9.0,16.0) | 8.2<br>(5.4,10.9)  | 7.6<br>(4.1,12.1)  | Urban        |
| Men | Gyeonggi-do | Siheung-si     | 11.4<br>(9.9,12.9)  | 18.6<br>(14.4,22.8) | 11.9<br>(8.6,15.2)  | 7.6<br>(4.9,10.3)   | 9.8<br>(6.1,12.4)  | 9.8<br>(6.7,12.8)  | 8.8<br>(4.8,13.2)  | Urban        |
| Men | Gyeonggi-do | Gunpo-si       | 11.8<br>(10.4,13.2) | 18.3<br>(14.3,22.3) | 11.0<br>(8.1,13.9)  | 9.2<br>(6.3,12.0)   | 11.4<br>(8.4,14.5) | 9.5<br>(6.7,12.3)  | 8.8<br>(1.4,10.0)  | Urban        |
| Men | Gyeonggi-do | Uiwang-si      | 10.2<br>(8.9,11.4)  | 14.7<br>(11.3,18.1) | 11.6<br>(8.5,14.8)  | 7.2<br>(4.8,9.6)    | 9.6<br>(6.9,12.2)  | 8.3<br>(5.8,10.9)  | 6.4<br>(3.5,11.5)  | Urban        |
| Men | Gyeonggi-do | Hanam-si       | 12.7<br>(11.3,14.1) | 17.9<br>(14.2,21.6) | 13.5<br>(10.2,16.8) | 11.2<br>(8.3,14.1)  | 11.4<br>(8.5,14.3) | 10.1<br>(7.2,13.0) | 7.8<br>(3.7,12.3)  | Urban        |
| Men | Gyeonggi-do | Cheoin-gu      | 10.7<br>(9.5,12.0)  | 14.6<br>(11.3,17.8) | 13.7<br>(10.5,16.8) | 7.8<br>(5.5,10.0)   | 10.7<br>(7.9,13.5) | 7.5<br>(5.2,9.8)   | 7.1<br>(0.5,8.3)   | Metropolitan |
| Men | Gyeonggi-do | Giheung-gu     | 8.4<br>(7.3,9.6)    | 13.7<br>(10.3,17.0) | 8.1<br>(5.6,10.6)   | 7.7<br>(5.3,10.0)   | 7.8<br>(5.3,10.4)  | 5.1<br>(3.2,7.0)   | 8.6<br>(3.4,10.4)  | Metropolitan |
| Men | Gyeonggi-do | Suji-gu        | 7.9<br>(6.8,8.9)    | 10.1<br>(7.3,12.8)  | 9.1<br>(6.5,11.8)   | 7.3<br>(5.1,9.6)    | 6.7<br>(4.5,8.9)   | 6.1<br>(3.9,8.2)   | 4.0<br>(1.3,8.3)   | Metropolitan |
| Men | Gyeonggi-do | Paju-si        | 12.3<br>(11.0,13.7) | 19.3<br>(15.5,23.1) | 13.2<br>(10.1,16.2) | 10.6<br>(7.9,13.4)  | 11.0<br>(8.2,13.8) | 8.1<br>(5.7,10.5)  | 11.2<br>(5.1,13.7) | Urban        |
| Men | Gyeonggi-do | Icheon-si      | 12.5<br>(11.2,13.9) | 16.8<br>(13.3,20.2) | 12.0<br>(9.0,15.0)  | 12.4<br>(9.4,15.3)  | 11.0<br>(8.3,13.7) | 10.5<br>(7.7,13.3) | 6.3<br>(3.4,11.8)  | Urban        |
| Men | Gyeonggi-do | Anseong-si     | 12.2<br>(10.9,13.4) | 18.1<br>(14.7,21.5) | 12.7<br>(9.8,15.7)  | 10.0<br>(7.4,12.6)  | 10.3<br>(7.7,12.9) | 9.4<br>(6.9,11.9)  | 8.7<br>(5.0,13.4)  | Urban        |
| Men | Gyeonggi-do | Gimpo-si       | 10.3<br>(9.1,11.5)  | 15.4<br>(12.1,18.8) | 10.3<br>(7.7,13.0)  | 10.0<br>(7.3,12.6)  | 8.6<br>(6.2,11.0)  | 7.6<br>(5.2,9.9)   | 7.8<br>(4.3,11.9)  | Urban        |
| Men | Gyeonggi-do | Hwaseong-si    | 11.4<br>(10.0,12.7) | 16.6<br>(13.0,20.2) | 13.1<br>(9.8,16.5)  | 10.3<br>(7.4,13.1)  | 8.2<br>(5.6,10.7)  | 9.0<br>(6.2,11.9)  | 7.6<br>(5.2,13.2)  | Urban        |
| Men | Gyeonggi-do | Gwangju-si     | 11.8<br>(10.5,13.1) | 16.0<br>(12.7,19.4) | 12.3<br>(9.3,15.2)  | 10.9<br>(8.2,13.6)  | 10.0<br>(7.3,12.7) | 9.6<br>(7.0,12.3)  | 6.4<br>(2.5,10.7)  | Urban        |
| Men | Gyeonggi-do | Yangju-si      | 13.1<br>(11.7,14.4) | 20.1<br>(16.3,24.0) | 12.0<br>(9.1,14.9)  | 10.3<br>(7.5,13.0)  | 12.0<br>(9.2,14.9) | 11.3<br>(8.3,14.2) | 8.8<br>(3.6,12.2)  | Urban        |
| Men | Gyeonggi-do | Pocheon-si     | 14.0<br>(12.7,15.3) | 23.0<br>(18.9,27.1) | 13.3<br>(10.5,16.1) | 13.2<br>(10.3,16.1) | 10.5<br>(7.9,13.1) | 10.6<br>(8.0,13.3) | 12.4<br>(6.3,15.3) | Urban        |
| Men | Gyeonggi-do | Yeoju-gun      | 13.7<br>(12.4,15.0) | 20.1<br>(16.6,23.6) | 13.9<br>(11.0,16.8) | 11.3<br>(8.7,14.0)  | 12.3<br>(9.6,15.0) | 11.3<br>(8.6,13.9) | 8.8<br>(1.2,10.2)  | Urban        |
| Men | Gyeonggi-do | Yeoncheon-gun  | 13.4<br>(12.1,14.7) | 22.6<br>(18.8,26.4) | 14.4<br>(11.5,17.2) | 11.3<br>(8.9,13.8)  | 10.4<br>(7.9,12.9) | 9.0<br>(6.8,11.2)  | 13.6<br>(6.1,14.9) | Rural        |
| Men | Gyeonggi-do | Gapyeong-gun   | 12.5<br>(11.3,13.7) | 21.5<br>(17.8,25.3) | 13.5<br>(10.7,16.3) | 11.5<br>(9.0,14.0)  | 8.2<br>(6.0,10.3)  | 8.0<br>(5.8,10.1)  | 13.5<br>(7.7,16.3) | Rural        |
| Men | Gyeonggi-do | Yangpyeong-gun | 12.9<br>(11.6,14.1) | 18.3<br>(14.9,21.6) | 15.2<br>(12.2,18.1) | 10.2<br>(7.7,12.6)  | 12.4<br>(9.8,15.0) | 8.1<br>(5.9,10.3)  | 10.2<br>(6.6,15.2) | Rural        |
| Men | Gangwon-do  | Chuncheon-si   | 11.5<br>(10.3,12.8) | 22.5<br>(18.3,26.6) | 12.6<br>(9.7,15.5)  | 8.8<br>(6.3,11.3)   | 8.0<br>(5.7,10.4)  | 7.1<br>(4.9,9.3)   | 15.4<br>(8.6,17.2) | Urban        |

|     |                   |                 |                     |                     |                     |                     |                     |                     |                     |              |
|-----|-------------------|-----------------|---------------------|---------------------|---------------------|---------------------|---------------------|---------------------|---------------------|--------------|
| Men | Gangwon-do        | Wonju-si        | 11.4<br>(10.2,12.7) | 18.4<br>(14.7,22.1) | 12.9<br>(10.0,15.8) | 8.8<br>(6.3,11.4)   | 9.9<br>(7.4,12.5)   | 7.4<br>(5.0,9.7)    | 11.0<br>(5.8,14.2)  | Urban        |
| Men | Gangwon-do        | Gangneung-si    | 13.6<br>(12.2,14.9) | 21.9<br>(17.9,25.9) | 13.4<br>(10.6,16.3) | 12.5<br>(9.8,15.2)  | 11.7<br>(8.9,14.4)  | 8.9<br>(6.4,11.3)   | 13.0<br>(9.8,18.6)  | Urban        |
| Men | Gangwon-do        | Donghae-si      | 12.2<br>(10.9,13.4) | 20.3<br>(16.6,24.0) | 12.4<br>(9.5,15.3)  | 10.7<br>(8.1,13.4)  | 7.6<br>(5.4,9.9)    | 10.0<br>(7.4,12.7)  | 10.3<br>(6.1,14.9)  | Urban        |
| Men | Gangwon-do        | Taebaek-si      | 18.7<br>(17.2,20.2) | 26.1<br>(21.9,30.2) | 21.0<br>(17.4,24.5) | 18.0<br>(14.6,21.4) | 14.3<br>(11.4,17.2) | 14.7<br>(11.7,17.8) | 11.4<br>(6.7,16.5)  | Urban        |
| Men | Gangwon-do        | Sokcho-si       | 14.7<br>(13.2,16.1) | 24.3<br>(20.1,28.5) | 15.6<br>(12.3,18.8) | 13.1<br>(10.2,16.1) | 10.2<br>(7.5,12.8)  | 10.3<br>(7.5,13.1)  | 14.0<br>(8.8,18.4)  | Urban        |
| Men | Gangwon-do        | Samcheok-si     | 15.1<br>(13.7,16.4) | 26.6<br>(22.4,30.8) | 16.2<br>(13.1,19.3) | 12.3<br>(9.6,14.9)  | 11.1<br>(8.5,13.7)  | 9.9<br>(7.5,12.3)   | 16.7<br>(9.3,18.7)  | Urban        |
| Men | Gangwon-do        | Hongcheon-gun   | 12.4<br>(11.2,13.6) | 19.9<br>(16.4,23.3) | 12.2<br>(9.6,14.8)  | 11.2<br>(8.6,13.7)  | 9.3<br>(7.1,11.4)   | 9.4<br>(7.0,11.8)   | 10.5<br>(7.9,16.7)  | Rural        |
| Men | Gangwon-do        | Hoengseong-gun  | 14.3<br>(13.0,15.6) | 19.9<br>(16.5,23.4) | 15.6<br>(12.6,18.5) | 13.8<br>(11.1,16.6) | 12.3<br>(9.7,14.9)  | 10.1<br>(7.6,12.7)  | 9.8<br>(5.3,14.1)   | Rural        |
| Men | Gangwon-do        | Yeongwol-gun    | 15.2<br>(13.9,16.6) | 24.5<br>(20.8,28.5) | 16.3<br>(13.3,19.3) | 12.7<br>(10.0,15.3) | 12.1<br>(9.5,14.7)  | 10.9<br>(8.4,13.4)  | 13.6<br>(9.6,18.6)  | Rural        |
| Men | Gangwon-do        | Pyeongchang-gun | 14.7<br>(13.4,16.1) | 23.6<br>(19.7,27.5) | 16.1<br>(13.0,19.2) | 12.6<br>(10.0,15.3) | 11.7<br>(9.1,14.3)  | 9.9<br>(7.5,12.4)   | 13.7<br>(7.3,16.3)  | Rural        |
| Men | Gangwon-do        | Jeongseon-gun   | 17.8<br>(16.4,19.3) | 25.6<br>(21.6,29.6) | 19.2<br>(15.9,22.5) | 18.0<br>(14.8,21.1) | 14.9<br>(12.0,17.7) | 11.7<br>(9.0,14.4)  | 13.9<br>(11.2,20.6) | Rural        |
| Men | Gangwon-do        | Cheorwon-gun    | 11.9<br>(10.7,13.1) | 22.1<br>(18.4,25.8) | 12.2<br>(9.6,14.8)  | 8.9<br>(6.5,11.3)   | 8.8<br>(6.5,11.2)   | 7.5<br>(5.3,9.6)    | 14.6<br>(9.7,18.3)  | Rural        |
| Men | Gangwon-do        | Hwacheon-gun    | 13.7<br>(12.4,15.1) | 21.5<br>(17.5,25.5) | 14.8<br>(11.8,17.9) | 11.3<br>(8.5,14.1)  | 12.7<br>(9.9,15.6)  | 8.6<br>(6.2,11.0)   | 12.9<br>(8.8,17.2)  | Rural        |
| Men | Gangwon-do        | Yanggu-gun      | 13.8<br>(12.5,15.2) | 22.2<br>(18.2,26.1) | 13.6<br>(10.5,16.7) | 13.2<br>(10.4,16.1) | 11.3<br>(8.5,14.0)  | 9.1<br>(6.6,11.5)   | 13.1<br>(7.5,16.5)  | Rural        |
| Men | Gangwon-do        | Inje-gun        | 13.2<br>(11.9,14.4) | 19.5<br>(15.9,23.0) | 13.7<br>(10.8,16.5) | 13.5<br>(10.6,16.3) | 9.7<br>(7.3,12.1)   | 9.5<br>(7.0,12.0)   | 10.0<br>(5.9,14.5)  | Rural        |
| Men | Gangwon-do        | Goseong-gun     | 13.7<br>(12.4,15.0) | 20.5<br>(16.8,24.2) | 18.1<br>(14.6,21.6) | 13.0<br>(10.1,15.9) | 9.2<br>(6.9,11.5)   | 8.0<br>(5.8,10.3)   | 12.5<br>(8.3,17.1)  | Rural        |
| Men | Gangwon-do        | Yangyang-gun    | 13.3<br>(12.0,14.5) | 22.2<br>(18.4,26.0) | 16.1<br>(13.0,19.2) | 10.0<br>(7.5,12.4)  | 10.5<br>(8.0,13.0)  | 8.0<br>(5.9,10.1)   | 14.2<br>(8.8,17.8)  | Rural        |
| Men | Chungcheongbuk-do | Cheongju-si     | 11.0<br>(10.3,11.8) | 17.4<br>(15.2,19.6) | 12.6<br>(10.8,14.5) | 9.1<br>(7.6,10.7)   | 9.1<br>(7.6,10.5)   | 7.8<br>(6.4,9.2)    | 9.6<br>(7.1,11.9)   | Metropolitan |
| Men | Chungcheongbuk-do | Chungju-si      | 15.1<br>(13.7,16.5) | 23.3<br>(19.4,27.3) | 17.9<br>(14.6,21.2) | 11.5<br>(8.9,14.2)  | 11.8<br>(9.1,14.4)  | 11.2<br>(8.5,13.9)  | 12.1<br>(8.6,17.8)  | Urban        |
| Men | Chungcheongbuk-do | Jecheon-si      | 12.4<br>(11.1,13.6) | 19.7<br>(16.2,23.3) | 12.5<br>(9.7,15.2)  | 10.9<br>(8.3,13.5)  | 9.7<br>(7.3,12.2)   | 9.5<br>(7.0,12.0)   | 10.2<br>(5.9,14.7)  | Urban        |
| Men | Chungcheongbuk-do | Boeun-gun       | 15.0<br>(13.7,16.3) | 24.7<br>(20.7,28.8) | 17.8<br>(14.6,21.1) | 12.1<br>(9.6,14.5)  | 9.8<br>(7.5,12.2)   | 11.8<br>(9.1,14.5)  | 12.9<br>(9.1,18.5)  | Rural        |
| Men | Chungcheongbuk-do | Okcheon-gun     | 13.3<br>(12.0,14.6) | 19.6<br>(16.0,23.1) | 16.1<br>(13.0,19.3) | 11.1<br>(8.6,13.6)  | 11.1<br>(8.6,13.7)  | 8.7<br>(6.3,11.0)   | 10.9<br>(5.0,13.8)  | Rural        |
| Men | Chungcheongbuk-do | Yeongdong-gun   | 13.0<br>(11.8,14.2) | 22.0<br>(18.3,25.7) | 12.9<br>(10.3,15.5) | 10.3<br>(8.0,12.6)  | 10.3<br>(7.8,12.7)  | 9.6<br>(7.3,12.0)   | 12.4<br>(7.2,16.2)  | Rural        |
| Men | Chungcheongbuk-do | Jincheon-gun    | 13.9<br>(12.5,15.2) | 20.7<br>(16.8,24.5) | 11.2<br>(8.5,13.8)  | 14.3<br>(11.2,17.5) | 11.6<br>(8.9,14.3)  | 12.3<br>(9.4,15.2)  | 8.4<br>(2.0,11.2)   | Rural        |
| Men | Chungcheongbuk-do | Goesan-gun      | 11.3<br>(10.1,12.5) | 16.0<br>(12.8,19.2) | 11.2<br>(8.6,13.8)  | 10.9<br>(8.2,13.6)  | 9.6<br>(7.1,12.0)   | 8.9<br>(6.5,11.3)   | 7.1<br>(2.1,10.3)   | Rural        |
| Men | Chungcheongbuk-do | Eumseong-gun    | 14.1<br>(12.8,15.3) | 22.0<br>(18.0,25.9) | 14.8<br>(11.9,17.8) | 14.0<br>(11.4,16.6) | 14.0<br>(7.8,12.5)  | 9.9<br>(7.5,12.3)   | 12.1<br>(7.7,16.5)  | Rural        |
| Men | Chungcheongbuk-do | Danyang-gun     | 14.6<br>(13.2,15.9) | 22.9<br>(19.2,26.7) | 13.3<br>(10.4,16.2) | 13.0<br>(10.2,15.7) | 10.1<br>(7.6,12.5)  | 13.3<br>(10.4,16.2) | 9.6<br>(2.2,11.6)   | Rural        |
| Men | Chungcheongbuk-do | Jeungpyeong-gun | 12.9<br>(11.7,14.1) | 24.0<br>(20.1,28.0) | 12.4<br>(9.9,15.0)  | 11.7<br>(9.3,14.1)  | 10.2<br>(7.8,12.5)  | 6.6<br>(4.7,8.5)    | 17.4<br>(11.9,20.5) | Rural        |
| Men | Chungcheongnam-do | Cheonan-si      | 13.8<br>(12.2,15.3) | 19.8<br>(15.7,23.9) | 16.1<br>(12.4,19.8) | 12.3<br>(9.1,15.5)  | 12.2<br>(9.1,15.4)  | 8.5<br>(5.9,11.1)   | 11.3<br>(8.0,16.6)  | Metropolitan |
| Men | Chungcheongnam-do | Gongju-si       | 14.1<br>(12.8,15.3) | 24.9<br>(21.0,28.9) | 16.1<br>(13.0,19.2) | 12.3<br>(9.6,14.9)  | 9.3<br>(7.1,11.4)   | 7.8<br>(5.7,9.9)    | 17.1<br>(13.0,21.8) | Urban        |
| Men | Chungcheongnam-do | Boryeong-si     | 16.8<br>(15.4,18.2) | 28.3<br>(23.9,32.7) | 18.9<br>(15.6,22.1) | 12.9<br>(10.1,15.7) | 12.7<br>(9.9,15.4)  | 12.1<br>(9.4,14.9)  | 16.2<br>(11.4,21.2) | Urban        |
| Men | Chungcheongnam-do | Asan-si         | 12.5<br>(11.2,13.8) | 21.6<br>(17.5,25.6) | 11.5<br>(8.7,14.4)  | 11.1<br>(8.2,14.0)  | 10.4<br>(7.7,13.1)  | 7.9<br>(5.6,10.3)   | 13.7<br>(7.1,15.3)  | Urban        |
| Men | Chungcheongnam-do | Seosan-si       | 13.4<br>(12.1,14.7) | 20.0<br>(16.4,23.7) | 14.0<br>(11.0,16.9) | 12.4<br>(9.6,15.1)  | 11.4<br>(8.7,14.1)  | 9.1<br>(6.7,11.5)   | 10.9<br>(7.0,15.4)  | Urban        |
| Men | Chungcheongnam-do | Nonsan-si       | 14.6<br>(13.3,15.9) | 24.3<br>(20.4,28.3) | 16.3<br>(13.3,19.4) | 12.1<br>(9.3,14.8)  | 10.6<br>(8.2,13.0)  | 9.4<br>(6.9,11.8)   | 14.9<br>(8.8,17.8)  | Urban        |
| Men | Chungcheongnam-do | Gyeryong-si     | 10.3<br>(8.8,11.7)  | 15.1<br>(11.0,19.1) | 12.1<br>(8.6,15.6)  | 9.8<br>(6.6,13.0)   | 8.4<br>(5.4,11.3)   | 6.2<br>(3.7,8.8)    | 8.9<br>(5.3,12.7)   | Urban        |
| Men | Chungcheongnam-do | Dangjin-si      | 13.4<br>(12.1,14.7) | 21.2<br>(17.5,24.8) | 11.1<br>(8.4,13.8)  | 12.5<br>(9.8,15.3)  | 12.5<br>(9.8,15.3)  | 9.9<br>(7.4,12.4)   | 11.3<br>(5.0,14.0)  | Rural        |
| Men | Chungcheongnam-do | Geumsan-gun     | 14.1<br>(12.9,15.4) | 21.0<br>(17.4,24.6) | 16.9<br>(13.6,20.1) | 12.7<br>(10.1,15.3) | 10.8<br>(8.4,13.2)  | 9.4<br>(7.1,11.7)   | 11.6<br>(6.1,15.1)  | Rural        |

|     |                   |                |                     |                     |                     |                     |                     |                    |                     |              |
|-----|-------------------|----------------|---------------------|---------------------|---------------------|---------------------|---------------------|--------------------|---------------------|--------------|
| Men | Chungcheongnam-do | Buyeo-gun      | 13.5<br>(12.3,14.8) | 23.3<br>(19.2,27.3) | 15.2<br>(12.3,18.2) | 10.3<br>(8.1,12.5)  | 10.6<br>(8.2,13.0)  | 8.8<br>(6.6,10.9)  | 14.5<br>(9.5,18.5)  | Rural        |
| Men | Chungcheongnam-do | Seocheon-gun   | 14.9<br>(13.5,16.3) | 24.0<br>(19.9,28.1) | 16.4<br>(13.3,19.5) | 12.8<br>(10.1,15.6) | 10.0<br>(7.6,12.4)  | 11.9<br>(9.1,14.7) | 12.1<br>(5.8,15.4)  | Rural        |
| Men | Chungcheongnam-do | Cheongyang-gun | 13.2<br>(12.0,14.4) | 23.0<br>(19.1,26.9) | 13.7<br>(11.1,16.4) | 11.6<br>(9.2,13.9)  | 10.1<br>(7.8,12.5)  | 8.1<br>(6.1,10.2)  | 14.9<br>(11.0,19.8) | Rural        |
| Men | Chungcheongnam-do | Hongseong-gun  | 14.7<br>(13.4,16.1) | 23.4<br>(19.6,27.2) | 14.6<br>(11.7,17.5) | 14.0<br>(11.1,16.9) | 11.4<br>(8.8,14.0)  | 10.5<br>(7.9,13.0) | 12.9<br>(8.8,18.0)  | Rural        |
| Men | Chungcheongnam-do | Yesan-gun      | 12.8<br>(11.6,14.0) | 20.9<br>(17.3,24.6) | 12.9<br>(10.2,15.7) | 11.3<br>(8.9,13.8)  | 9.1<br>(6.9,11.3)   | 10.1<br>(7.6,12.5) | 10.8<br>(6.6,15.6)  | Rural        |
| Men | Chungcheongnam-do | Taean-gun      | 13.3<br>(12.0,14.5) | 17.8<br>(14.5,21.1) | 14.7<br>(11.7,17.7) | 12.8<br>(10.2,15.5) | 11.1<br>(8.6,13.7)  | 10.2<br>(7.8,12.6) | 7.6<br>(2.2,11.0)   | Urban        |
| Men | Jeollabuk-do      | Jeonju-si      | 11.4<br>(10.1,12.7) | 18.8<br>(15.0,22.6) | 12.6<br>(9.6,15.6)  | 9.1<br>(6.6,11.7)   | 9.0<br>(6.4,11.6)   | 8.3<br>(5.9,10.7)  | 10.5<br>(6.3,14.9)  | Metropolitan |
| Men | Jeollabuk-do      | Gunsan-si      | 14.6<br>(13.2,16.0) | 22.1<br>(18.2,26.0) | 12.9<br>(9.8,15.9)  | 13.2<br>(10.3,16.2) | 13.1<br>(10.1,16.1) | 12.3<br>(9.4,15.1) | 9.8<br>(5.6,14.8)   | Urban        |
| Men | Jeollabuk-do      | Iksan-si       | 15.2<br>(13.8,16.6) | 25.7<br>(21.5,29.9) | 15.6<br>(12.5,18.7) | 14.3<br>(11.4,17.3) | 10.8<br>(8.1,13.4)  | 10.1<br>(7.6,12.6) | 15.6<br>(12.2,21.6) | Urban        |
| Men | Jeollabuk-do      | Jeongeup-si    | 16.4<br>(14.9,17.8) | 26.2<br>(22.0,30.5) | 18.0<br>(14.7,21.3) | 14.8<br>(11.9,17.7) | 11.5<br>(8.9,14.1)  | 11.8<br>(9.0,14.6) | 14.4<br>(8.2,18.0)  | Urban        |
| Men | Jeollabuk-do      | Namwon-si      | 15.2<br>(13.8,16.5) | 23.7<br>(19.7,27.6) | 18.0<br>(14.7,21.4) | 13.7<br>(10.9,16.6) | 9.8<br>(7.4,12.1)   | 11.0<br>(8.5,13.6) | 12.7<br>(9.5,18.7)  | Urban        |
| Men | Jeollabuk-do      | Gimje-si       | 15.7<br>(14.4,17.1) | 25.7<br>(21.6,29.8) | 15.9<br>(12.9,18.9) | 14.0<br>(11.2,16.9) | 12.9<br>(10.2,15.6) | 10.6<br>(8.0,13.2) | 15.1<br>(9.1,18.7)  | Urban        |
| Men | Jeollabuk-do      | Wanju-gun      | 13.3<br>(12.1,14.5) | 18.9<br>(15.5,22.2) | 17.8<br>(14.5,21.0) | 11.9<br>(9.4,14.3)  | 8.5<br>(6.3,10.7)   | 9.6<br>(7.3,11.9)  | 9.3<br>(6.2,14.8)   | Rural        |
| Men | Jeollabuk-do      | Jinan-gun      | 13.2<br>(11.9,14.4) | 19.9<br>(16.4,23.5) | 15.6<br>(12.5,18.6) | 11.3<br>(8.9,13.8)  | 10.6<br>(8.2,13.0)  | 8.2<br>(6.1,10.3)  | 11.7<br>(7.9,17.1)  | Rural        |
| Men | Jeollabuk-do      | Muju-gun       | 14.2<br>(12.8,15.5) | 23.4<br>(19.4,27.4) | 15.4<br>(12.5,18.4) | 12.8<br>(10.1,15.6) | 10.3<br>(7.9,12.7)  | 8.4<br>(6.1,10.6)  | 15.0<br>(10.2,19.6) | Rural        |
| Men | Jeollabuk-do      | Jangsu-gun     | 15.5<br>(14.2,16.9) | 24.6<br>(20.4,28.7) | 17.0<br>(13.8,20.2) | 13.3<br>(10.5,16.0) | 11.7<br>(9.2,14.2)  | 11.6<br>(9.0,14.2) | 13.0<br>(6.8,16.6)  | Rural        |
| Men | Jeollabuk-do      | Imsil-gun      | 15.1<br>(13.7,16.4) | 23.6<br>(19.4,27.9) | 14.8<br>(12.1,17.5) | 15.2<br>(12.2,18.2) | 13.5<br>(10.8,16.3) | 8.1<br>(6.1,10.2)  | 15.5<br>(13.6,22.6) | Rural        |
| Men | Jeollabuk-do      | Sunchang-gun   | 14.9<br>(13.5,16.3) | 22.6<br>(18.8,26.5) | 19.8<br>(16.2,23.4) | 12.4<br>(9.9,14.9)  | 11.3<br>(8.6,14.0)  | 8.3<br>(6.1,10.4)  | 14.3<br>(11.0,20.4) | Rural        |
| Men | Jeollabuk-do      | Gochang-gun    | 17.9<br>(16.4,19.4) | 29.8<br>(25.1,34.6) | 18.7<br>(15.3,22.1) | 14.8<br>(11.9,17.7) | 16.2<br>(13.0,19.4) | 10.7<br>(8.2,13.1) | 19.1<br>(13.7,23.5) | Rural        |
| Men | Jeollabuk-do      | Buan-gun       | 17.2<br>(15.7,18.6) | 29.1<br>(24.7,33.6) | 19.1<br>(15.5,22.7) | 15.9<br>(12.8,18.9) | 9.8<br>(7.4,12.1)   | 11.5<br>(8.8,14.1) | 17.6<br>(12.4,22.8) | Rural        |
| Men | Jeollanam-do      | Mokpo-si       | 14.0<br>(12.6,15.4) | 24.2<br>(20.0,28.4) | 15.9<br>(12.5,19.3) | 12.5<br>(9.6,15.4)  | 10.4<br>(7.7,13.1)  | 7.3<br>(5.0,9.6)   | 16.9<br>(9.8,18.6)  | Urban        |
| Men | Jeollanam-do      | Yeosu-si       | 13.2<br>(11.9,14.5) | 21.6<br>(17.8,25.4) | 13.5<br>(10.7,16.3) | 9.8<br>(7.3,12.4)   | 10.2<br>(7.6,12.8)  | 11.0<br>(8.2,13.8) | 10.6<br>(5.6,14.6)  | Urban        |
| Men | Jeollanam-do      | Suncheon-si    | 12.2<br>(10.9,13.4) | 20.1<br>(16.4,23.8) | 13.9<br>(10.8,17.0) | 8.8<br>(6.4,11.2)   | 8.1<br>(5.7,10.5)   | 10.0<br>(7.4,12.6) | 10.1<br>(7.3,16.3)  | Urban        |
| Men | Jeollanam-do      | Naju-si        | 14.9<br>(13.6,16.3) | 26.5<br>(22.4,30.7) | 14.5<br>(11.6,17.4) | 13.3<br>(10.5,16.1) | 11.1<br>(8.6,13.5)  | 9.2<br>(6.9,11.5)  | 17.3<br>(13.1,22.5) | Urban        |
| Men | Jeollanam-do      | Gwangyang-si   | 11.2<br>(9.9,12.5)  | 18.0<br>(14.2,21.7) | 12.5<br>(9.4,15.5)  | 9.9<br>(6.9,12.8)   | 7.9<br>(5.4,10.3)   | 8.2<br>(5.5,10.8)  | 9.8<br>(4.2,12.2)   | Urban        |
| Men | Jeollanam-do      | Damyang-gun    | 14.7<br>(13.4,16.0) | 25.7<br>(21.6,29.9) | 15.6<br>(12.5,18.6) | 13.4<br>(10.8,16.0) | 9.5<br>(7.4,11.7)   | 9.6<br>(7.2,12.0)  | 16.1<br>(12.1,21.1) | Rural        |
| Men | Jeollanam-do      | Gokseong-gun   | 14.1<br>(12.8,15.5) | 20.9<br>(17.0,24.8) | 14.9<br>(11.8,17.9) | 13.9<br>(11.0,16.7) | 9.1<br>(6.8,11.3)   | 12.4<br>(9.6,15.3) | 8.5<br>(3.9,13.5)   | Rural        |
| Men | Jeollanam-do      | Gurye-gun      | 11.7<br>(10.5,12.9) | 23.1<br>(19.1,27.1) | 13.8<br>(10.9,16.8) | 7.4<br>(5.5,9.3)    | 9.0<br>(6.7,11.2)   | 5.9<br>(4.1,7.8)   | 17.2<br>(11.2,20.2) | Rural        |
| Men | Jeollanam-do      | Goheung-gun    | 14.4<br>(13.1,15.8) | 30.2<br>(25.3,35.1) | 13.3<br>(10.6,16.0) | 11.8<br>(9.4,14.2)  | 11.1<br>(8.6,13.6)  | 7.0<br>(5.1,8.8)   | 23.2<br>(18.9,28.1) | Rural        |
| Men | Jeollanam-do      | Boseong-gun    | 15.2<br>(13.8,16.6) | 25.5<br>(21.1,29.8) | 19.3<br>(15.9,22.8) | 12.8<br>(10.2,15.3) | 10.4<br>(8.0,12.8)  | 7.8<br>(5.9,9.8)   | 17.7<br>(13.7,23.5) | Rural        |
| Men | Jeollanam-do      | Hwasun-gun     | 15.9<br>(14.5,17.3) | 25.5<br>(21.3,29.6) | 16.0<br>(13.0,19.1) | 15.2<br>(12.2,18.2) | 10.8<br>(8.2,13.4)  | 12.2<br>(9.4,15.0) | 13.3<br>(8.1,18.1)  | Rural        |
| Men | Jeollanam-do      | Jangheung-gun  | 15.2<br>(13.8,16.6) | 29.8<br>(25.0,34.5) | 15.9<br>(12.9,18.9) | 12.5<br>(9.8,15.2)  | 9.4<br>(7.3,11.5)   | 9.4<br>(6.8,11.9)  | 20.4<br>(12.9,22.5) | Rural        |
| Men | Jeollanam-do      | Gangjin-gun    | 12.0<br>(10.8,13.2) | 21.0<br>(17.1,25.0) | 14.7<br>(11.6,17.8) | 10.9<br>(8.4,13.4)  | 9.2<br>(6.8,11.5)   | 4.9<br>(3.4,6.4)   | 16.1<br>(10.8,19.2) | Rural        |
| Men | Jeollanam-do      | Haenam-gun     | 15.6<br>(14.2,17.0) | 26.2<br>(21.8,30.7) | 14.8<br>(11.8,17.7) | 13.6<br>(10.9,16.3) | 12.8<br>(10.0,15.6) | 11.7<br>(9.0,14.5) | 14.5<br>(7.7,17.3)  | Rural        |
| Men | Jeollanam-do      | Yeongam-gun    | 15.0<br>(13.6,16.3) | 24.6<br>(20.7,28.6) | 16.5<br>(13.4,19.6) | 12.2<br>(9.4,14.9)  | 11.6<br>(9.1,14.2)  | 10.3<br>(7.8,12.7) | 14.3<br>(10.3,19.5) | Rural        |
| Men | Jeollanam-do      | Muan-gun       | 13.7<br>(12.4,15.0) | 20.5<br>(16.8,24.1) | 14.4<br>(11.5,17.3) | 13.9<br>(11.1,16.7) | 9.9<br>(7.6,12.2)   | 10.5<br>(7.9,13.1) | 10.0<br>(6.3,15.3)  | Rural        |
| Men | Jeollanam-do      | Hampyeong-gun  | 15.6<br>(14.2,17.0) | 25.5<br>(21.3,29.7) | 16.1<br>(13.0,19.2) | 13.1<br>(10.3,16.0) | 12.9<br>(10.2,15.7) | 10.2<br>(7.8,12.6) | 15.3<br>(9.3,18.7)  | Rural        |

|     |                  |                |                     |                     |                     |                     |                     |                     |                     |              |
|-----|------------------|----------------|---------------------|---------------------|---------------------|---------------------|---------------------|---------------------|---------------------|--------------|
| Men | Jeollanam-do     | Yeonggwang-gun | 15.8<br>(14.5,17.2) | 26.3<br>(22.2,30.4) | 18.7<br>(15.4,22.0) | 15.0<br>(12.0,17.9) | 11.2<br>(8.8,13.7)  | 8.3<br>(6.1,10.4)   | 18.0<br>(14.7,24.1) | Rural        |
| Men | Jeollanam-do     | Jangseong-gun  | 15.3<br>(14.0,16.7) | 25.8<br>(21.6,29.9) | 15.6<br>(12.5,18.8) | 12.8<br>(10.1,15.4) | 12.1<br>(9.5,14.8)  | 10.6<br>(8.1,13.1)  | 15.2<br>(7.2,17.0)  | Rural        |
| Men | Jeollanam-do     | Wando-gun      | 15.7<br>(14.4,17.1) | 28.8<br>(24.4,33.3) | 16.7<br>(13.7,19.7) | 12.0<br>(9.6,14.4)  | 12.6<br>(10.0,15.3) | 8.9<br>(6.6,11.1)   | 19.9<br>(15.4,24.8) | Rural        |
| Men | Jeollanam-do     | Jindo-gun      | 15.4<br>(14.1,16.8) | 26.8<br>(22.4,31.1) | 17.4<br>(14.2,20.6) | 13.1<br>(10.6,15.7) | 9.9<br>(7.7,12.1)   | 9.9<br>(7.5,12.4)   | 16.9<br>(12.3,21.7) | Rural        |
| Men | Jeollanam-do     | Sinan-gun      | 16.7<br>(15.3,18.1) | 24.4<br>(20.5,28.3) | 18.9<br>(15.7,22.1) | 16.3<br>(13.1,19.5) | 12.2<br>(9.7,14.7)  | 11.0<br>(8.4,13.7)  | 13.4<br>(10.5,20.1) | Rural        |
| Men | Gyeongsangbuk-do | Nam-gu         | 13.8<br>(12.4,15.2) | 23.9<br>(19.8,27.9) | 14.8<br>(11.7,17.9) | 12.1<br>(9.0,15.1)  | 9.5<br>(6.7,12.2)   | 8.7<br>(6.3,11.2)   | 15.2<br>(10.9,19.5) | Metropolitan |
| Men | Gyeongsangbuk-do | Buk-gu         | 12.4<br>(11.1,13.7) | 19.0<br>(15.4,22.7) | 12.6<br>(9.8,15.4)  | 11.0<br>(8.2,13.8)  | 9.8<br>(7.2,12.4)   | 9.5<br>(6.9,12.1)   | 9.5<br>(5.9,14.3)   | Metropolitan |
| Men | Gyeongsangbuk-do | Gyeongju-si    | 15.2<br>(13.8,16.6) | 23.5<br>(19.6,27.5) | 15.0<br>(11.9,18.1) | 14.9<br>(12.0,17.9) | 10.9<br>(8.3,13.4)  | 12.0<br>(9.2,14.8)  | 11.5<br>(5.8,15.0)  | Urban        |
| Men | Gyeongsangbuk-do | Gimcheon-si    | 14.8<br>(13.5,16.2) | 22.9<br>(19.2,26.7) | 16.0<br>(12.9,19.1) | 14.2<br>(11.2,17.1) | 10.1<br>(7.6,12.6)  | 10.8<br>(8.2,13.4)  | 12.1<br>(6.6,15.8)  | Urban        |
| Men | Gyeongsangbuk-do | Andong-si      | 14.2<br>(12.9,15.6) | 23.8<br>(19.8,27.7) | 15.2<br>(12.3,18.1) | 13.2<br>(10.4,16.1) | 9.9<br>(7.6,12.3)   | 9.8<br>(7.3,12.2)   | 14.0<br>(8.2,17.0)  | Urban        |
| Men | Gyeongsangbuk-do | Gumi-si        | 14.6<br>(13.4,15.8) | 22.7<br>(19.3,26.1) | 14.6<br>(12.0,17.2) | 14.3<br>(11.6,17.0) | 11.7<br>(9.3,14.1)  | 11.1<br>(8.9,13.4)  | 11.6<br>(6.6,13.2)  | Urban        |
| Men | Gyeongsangbuk-do | Yeongju-si     | 14.8<br>(13.4,16.1) | 26.1<br>(21.8,30.3) | 14.0<br>(11.2,16.9) | 13.9<br>(11.1,16.8) | 11.6<br>(8.9,14.2)  | 8.6<br>(6.4,10.8)   | 17.5<br>(11.7,20.9) | Urban        |
| Men | Gyeongsangbuk-do | Yeongcheon-si  | 16.7<br>(15.2,18.1) | 24.3<br>(20.3,28.3) | 19.6<br>(16.1,23.1) | 14.9<br>(12.1,17.7) | 10.9<br>(8.4,13.4)  | 13.6<br>(10.6,16.5) | 10.7<br>(7.2,17.0)  | Urban        |
| Men | Gyeongsangbuk-do | Sangju-si      | 15.2<br>(13.8,16.5) | 23.4<br>(19.6,27.1) | 14.9<br>(12.1,17.7) | 13.8<br>(11.0,16.5) | 13.3<br>(10.6,15.9) | 10.3<br>(7.8,12.7)  | 13.1<br>(8.6,17.6)  | Urban        |
| Men | Gyeongsangbuk-do | Mungyeong-si   | 15.7<br>(14.4,17.1) | 25.0<br>(21.0,28.9) | 12.5<br>(9.8,15.2)  | 16.2<br>(13.1,19.3) | 12.6<br>(9.9,15.3)  | 12.6<br>(9.7,15.5)  | 12.4<br>(5.8,15.8)  | Urban        |
| Men | Gyeongsangbuk-do | Gyeongsan-si   | 15.3<br>(13.9,16.7) | 23.6<br>(19.6,27.7) | 15.1<br>(12.1,18.2) | 11.9<br>(9.0,14.8)  | 13.6<br>(10.6,16.7) | 12.3<br>(9.4,15.2)  | 11.3<br>(4.1,13.3)  | Urban        |
| Men | Gyeongsangbuk-do | Gunwi-gun      | 14.6<br>(13.3,15.9) | 22.2<br>(18.1,26.3) | 16.6<br>(13.5,19.7) | 13.1<br>(10.5,15.6) | 11.7<br>(9.1,14.2)  | 10.1<br>(7.7,12.5)  | 12.1<br>(5.2,14.6)  | Rural        |
| Men | Gyeongsangbuk-do | Uiseong-gun    | 13.6<br>(12.4,14.9) | 18.5<br>(15.0,22.0) | 15.6<br>(12.6,18.6) | 12.0<br>(9.5,14.5)  | 11.5<br>(8.9,14.2)  | 11.1<br>(8.4,13.7)  | 7.4<br>(3.1,12.3)   | Rural        |
| Men | Gyeongsangbuk-do | Cheongsong-gun | 16.9<br>(15.4,18.4) | 27.8<br>(23.2,32.4) | 16.1<br>(13.2,19.0) | 14.7<br>(11.8,17.6) | 12.3<br>(9.7,14.9)  | 14.0<br>(10.8,17.3) | 13.8<br>(9.2,19.2)  | Rural        |
| Men | Gyeongsangbuk-do | Yeongyang-gun  | 17.3<br>(15.8,18.7) | 24.5<br>(20.6,28.4) | 21.0<br>(17.5,24.5) | 15.3<br>(12.4,18.3) | 13.6<br>(10.8,16.3) | 11.6<br>(8.9,14.3)  | 12.9<br>(11.0,20.6) | Rural        |
| Men | Gyeongsangbuk-do | Yeongdeok-gun  | 16.7<br>(15.2,18.3) | 30.3<br>(25.3,35.3) | 20.3<br>(16.6,23.9) | 12.9<br>(10.1,15.8) | 10.8<br>(8.3,13.3)  | 9.7<br>(7.2,12.2)   | 20.6<br>(12.2,21.8) | Rural        |
| Men | Gyeongsangbuk-do | Cheongdo-gun   | 16.1<br>(14.7,17.6) | 27.9<br>(23.3,32.5) | 14.7<br>(11.8,17.5) | 14.8<br>(11.9,17.7) | 13.1<br>(10.2,15.9) | 10.7<br>(8.1,13.2)  | 17.2<br>(9.5,19.5)  | Rural        |
| Men | Gyeongsangbuk-do | Goryeong-gun   | 14.7<br>(13.3,16.0) | 21.1<br>(17.4,24.8) | 14.2<br>(11.3,17.1) | 14.0<br>(11.1,16.9) | 12.0<br>(9.4,14.6)  | 12.0<br>(9.3,14.8)  | 9.1<br>(3.7,13.3)   | Rural        |
| Men | Gyeongsangbuk-do | Seongju-gun    | 10.4<br>(9.3,11.5)  | 18.8<br>(15.3,22.3) | 10.6<br>(8.2,13.1)  | 7.4<br>(5.3,9.5)    | 7.5<br>(5.9,9.5)    | 7.7<br>(5.7,9.8)    | 11.1<br>(7.8,16.0)  | Rural        |
| Men | Gyeongsangbuk-do | Chilgok-gun    | 14.8<br>(13.3,16.3) | 24.2<br>(20.0,28.4) | 15.5<br>(12.0,18.9) | 13.6<br>(10.6,16.7) | 9.1<br>(6.5,11.6)   | 11.7<br>(8.7,14.7)  | 12.5<br>(7.1,16.3)  | Rural        |
| Men | Gyeongsangbuk-do | Yecheon-gun    | 16.1<br>(14.7,17.6) | 31.0<br>(26.2,35.8) | 15.0<br>(12.1,18.0) | 14.7<br>(11.7,17.6) | 11.3<br>(8.8,13.9)  | 9.4<br>(7.0,11.8)   | 21.6<br>(12.7,22.7) | Rural        |
| Men | Gyeongsangbuk-do | Bonghwa-gun    | 15.9<br>(14.5,17.2) | 23.5<br>(19.7,27.4) | 15.7<br>(12.8,18.6) | 17.3<br>(14.0,20.5) | 10.6<br>(8.3,12.8)  | 12.0<br>(9.2,14.8)  | 11.5<br>(5.3,14.9)  | Rural        |
| Men | Gyeongsangbuk-do | Uljin-gun      | 15.1<br>(13.8,16.5) | 23.2<br>(19.3,27.1) | 15.8<br>(12.7,18.9) | 11.4<br>(9.0,13.8)  | 13.2<br>(10.3,16.0) | 12.5<br>(9.8,15.2)  | 10.7<br>(6.1,16.1)  | Rural        |
| Men | Gyeongsangbuk-do | Ulleung-gun    | 13.1<br>(11.8,14.4) | 21.7<br>(17.9,25.5) | 14.5<br>(11.4,17.6) | 11.3<br>(8.8,13.9)  | 9.1<br>(6.7,11.4)   | 9.4<br>(6.9,11.9)   | 12.3<br>(8.9,18.3)  | Rural        |
| Men | Gyeongsangnam-do | Changwon-si    | 13.6<br>(11.9,15.2) | 18.6<br>(14.2,22.9) | 15.2<br>(11.1,19.4) | 13.4<br>(10.0,16.9) | 11.3<br>(8.0,14.7)  | 9.5<br>(6.2,12.8)   | 9.1<br>(6.0,14.6)   | Metropolitan |
| Men | Gyeongsangnam-do | Masan-si       | 12.6<br>(11.3,13.9) | 19.9<br>(16.2,23.6) | 11.3<br>(8.6,13.9)  | 11.8<br>(9.0,14.5)  | 11.6<br>(8.7,14.5)  | 8.6<br>(6.1,11.1)   | 11.3<br>(6.2,14.8)  | Metropolitan |
| Men | Gyeongsangnam-do | Jinju-si       | 12.8<br>(11.5,14.1) | 22.7<br>(18.6,26.8) | 11.4<br>(8.7,14.2)  | 12.4<br>(9.4,15.3)  | 10.6<br>(7.9,13.3)  | 7.1<br>(4.8,9.4)    | 15.6<br>(10.1,18.9) | Urban        |
| Men | Gyeongsangnam-do | Jinhae-si      | 13.1<br>(11.7,14.5) | 21.5<br>(17.2,25.7) | 13.3<br>(10.3,16.4) | 13.1<br>(9.9,16.3)  | 10.4<br>(7.6,13.1)  | 8.1<br>(5.6,10.6)   | 13.4<br>(7.7,16.5)  | Metropolitan |
| Men | Gyeongsangnam-do | Tongyeong-si   | 16.2<br>(14.7,17.6) | 26.7<br>(22.4,31.1) | 18.3<br>(15.0,21.7) | 14.2<br>(11.1,17.4) | 11.7<br>(8.9,14.5)  | 10.1<br>(7.5,12.8)  | 16.6<br>(11.3,20.5) | Urban        |
| Men | Gyeongsangnam-do | Sacheon-si     | 15.1<br>(13.7,16.5) | 25.8<br>(21.7,30.0) | 15.8<br>(12.4,19.1) | 11.0<br>(8.4,13.5)  | 12.1<br>(9.3,14.9)  | 11.4<br>(8.6,14.2)  | 14.4<br>(8.5,18.1)  | Urban        |
| Men | Gyeongsangnam-do | Gimhae-si      | 13.8<br>(12.2,15.3) | 22.4<br>(17.9,27.0) | 13.9<br>(10.6,17.2) | 11.9<br>(8.6,15.2)  | 10.2<br>(7.4,13.1)  | 11.5<br>(8.2,14.8)  | 10.9<br>(5.6,14.6)  | Urban        |
| Men | Gyeongsangnam-do | Miryang-si     | 14.8<br>(13.4,16.1) | 27.0<br>(22.9,31.1) | 15.9<br>(12.8,18.9) | 12.0<br>(9.4,14.6)  | 8.8<br>(6.6,11.1)   | 10.4<br>(7.9,12.9)  | 16.6<br>(13.6,22.8) | Urban        |



|       |                  |                 |                     |                     |                     |                     |                     |                     |                     |              |
|-------|------------------|-----------------|---------------------|---------------------|---------------------|---------------------|---------------------|---------------------|---------------------|--------------|
| Men   | Gyeongsangnam-do | Geoje-si        | 13.6<br>(12.1,15.2) | 20.3<br>(16.1,24.4) | 12.9<br>(9.5,16.3)  | 12.0<br>(8.7,15.4)  | 10.8<br>(7.8,13.7)  | 12.1<br>(8.9,15.2)  | 8.2<br>(3.9,12.9)   | Urban        |
| Men   | Gyeongsangnam-do | Yangsan-si      | 11.4<br>(10.1,12.7) | 17.3<br>(13.7,20.9) | 12.2<br>(9.1,15.4)  | 9.0<br>(6.5,11.4)   | 9.6<br>(6.8,12.5)   | 9.3<br>(6.6,11.9)   | 8.0<br>(3.4,12.0)   | Urban        |
| Men   | Gyeongsangnam-do | Uiryeong-gun    | 16.1<br>(14.6,17.6) | 22.7<br>(18.5,27.0) | 18.0<br>(14.7,21.3) | 13.0<br>(10.2,15.7) | 15.1<br>(11.8,18.3) | 12.7<br>(9.7,15.7)  | 10.0<br>(8.7,18.9)  | Rural        |
| Men   | Gyeongsangnam-do | Haman-gun       | 13.0<br>(11.7,14.2) | 21.5<br>(17.8,25.2) | 12.8<br>(10.1,15.6) | 11.7<br>(9.1,14.3)  | 10.2<br>(7.8,12.6)  | 8.9<br>(6.6,11.2)   | 12.6<br>(8.4,17.6)  | Rural        |
| Men   | Gyeongsangnam-do | Changnyeong-gun | 15.0<br>(13.7,16.4) | 23.0<br>(19.0,27.0) | 16.6<br>(13.5,19.7) | 13.5<br>(10.7,16.3) | 11.2<br>(8.7,13.7)  | 11.0<br>(8.4,13.6)  | 12.0<br>(7.8,17.4)  | Rural        |
| Men   | Gyeongsangnam-do | Goseong-gun     | 13.3<br>(12.1,14.6) | 24.5<br>(20.4,28.7) | 14.6<br>(11.5,17.6) | 11.3<br>(8.9,13.8)  | 8.8<br>(6.4,11.1)   | 8.2<br>(5.9,10.4)   | 16.3<br>(10.6,19.6) | Rural        |
| Men   | Gyeongsangnam-do | Namhae-gun      | 18.6<br>(17.0,20.1) | 28.3<br>(23.9,32.8) | 21.6<br>(17.8,25.5) | 15.9<br>(12.8,18.9) | 15.5<br>(12.2,18.9) | 11.7<br>(9.0,14.5)  | 16.6<br>(11.5,22.1) | Rural        |
| Men   | Gyeongsangnam-do | Hadong-gun      | 17.7<br>(16.2,19.2) | 25.8<br>(21.5,30.0) | 16.5<br>(13.4,19.6) | 19.3<br>(15.9,22.8) | 14.2<br>(11.2,17.2) | 12.6<br>(9.7,15.4)  | 13.2<br>(5.8,16.0)  | Rural        |
| Men   | Gyeongsangnam-do | Sancheong-gun   | 16.9<br>(15.4,18.3) | 28.1<br>(23.5,32.7) | 18.3<br>(15.0,21.5) | 12.9<br>(10.2,15.6) | 13.7<br>(10.9,16.6) | 11.7<br>(8.9,14.5)  | 16.4<br>(11.7,21.9) | Rural        |
| Men   | Gyeongsangnam-do | Hamyang-gun     | 16.8<br>(15.3,18.3) | 22.2<br>(18.3,26.1) | 21.6<br>(17.9,25.4) | 15.1<br>(12.0,18.2) | 13.9<br>(10.9,16.8) | 11.1<br>(8.6,13.7)  | 11.1<br>(10.3,20.5) | Rural        |
| Men   | Gyeongsangnam-do | Geochang-gun    | 15.0<br>(13.6,16.3) | 25.1<br>(21.0,29.2) | 16.7<br>(13.6,19.9) | 12.7<br>(9.9,15.4)  | 11.3<br>(8.7,13.8)  | 9.5<br>(7.1,11.9)   | 15.6<br>(8.6,18.0)  | Rural        |
| Men   | Gyeongsangnam-do | Hapcheon-gun    | 16.1<br>(14.7,17.5) | 26.4<br>(21.9,30.9) | 18.3<br>(14.9,21.8) | 13.5<br>(10.6,16.3) | 10.2<br>(7.9,12.4)  | 13.0<br>(10.0,16.1) | 13.4<br>(7.3,16.9)  | Rural        |
| Men   | Jeju-do          | Jeju-si         | 14.2<br>(13.3,15.0) | 23.8<br>(21.4,26.3) | 15.3<br>(13.3,17.3) | 12.9<br>(11.0,14.8) | 9.9<br>(8.3,11.5)   | 9.8<br>(8.3,11.3)   | 14.0<br>(11.1,16.5) | Urban        |
| Men   | Jeju-do          | Seogwipo-si     | 15.1<br>(14.2,15.9) | 22.5<br>(20.1,24.9) | 15.5<br>(13.6,17.4) | 13.7<br>(11.9,15.4) | 12.7<br>(11.0,14.4) | 11.6<br>(9.9,13.2)  | 10.9<br>(6.4,12.0)  | Urban        |
| Women | Seoul            | Jongno-gu       | 14.4<br>(13.2,15.6) | 21.7<br>(18.4,25.1) | 14.0<br>(11.4,16.6) | 14.1<br>(11.4,16.8) | 12.3<br>(9.9,14.8)  | 10.2<br>(8.0,12.5)  | 11.5<br>(3.8,12.2)  | Metropolitan |
| Women | Seoul            | Jung-gu         | 15.3<br>(14.1,16.6) | 22.7<br>(19.2,26.3) | 16.8<br>(13.9,19.8) | 14.9<br>(12.2,17.6) | 11.3<br>(8.9,13.7)  | 11.2<br>(8.8,13.6)  | 11.5<br>(7.4,16.0)  | Metropolitan |
| Women | Seoul            | Yongsan-gu      | 11.1<br>(10.0,12.1) | 16.9<br>(13.8,19.9) | 12.1<br>(9.6,14.6)  | 8.6<br>(6.5,10.6)   | 9.1<br>(7.0,11.2)   | 8.9<br>(6.8,11.1)   | 8.0<br>(4.0,11.6)   | Metropolitan |
| Women | Seoul            | Seongdong-gu    | 14.3<br>(13.1,15.6) | 18.9<br>(15.6,22.2) | 17.1<br>(14.0,20.2) | 13.4<br>(10.7,16.0) | 11.6<br>(9.0,14.1)  | 10.6<br>(8.1,13.0)  | 8.3<br>(2.8,10.6)   | Metropolitan |
| Women | Seoul            | Gwangjin-gu     | 14.1<br>(12.8,15.4) | 18.9<br>(15.5,22.3) | 14.6<br>(11.6,17.6) | 13.2<br>(10.3,16.0) | 13.0<br>(10.3,15.7) | 11.1<br>(8.5,13.8)  | 7.8<br>(3.8,12.0)   | Metropolitan |
| Women | Seoul            | Dongdaemun-gu   | 16.1<br>(14.8,17.4) | 19.9<br>(16.6,23.2) | 17.6<br>(14.6,20.6) | 16.5<br>(13.6,19.4) | 15.5<br>(12.6,18.3) | 11.3<br>(8.9,13.7)  | 8.6<br>(5.1,13.3)   | Metropolitan |
| Women | Seoul            | Jungnang-gu     | 14.4<br>(13.2,15.7) | 20.7<br>(17.3,24.1) | 14.9<br>(12.2,17.6) | 13.6<br>(11.0,16.3) | 12.1<br>(9.5,14.6)  | 11.1<br>(8.7,13.6)  | 9.6<br>(4.6,12.6)   | Metropolitan |
| Women | Seoul            | Seongbuk-gu     | 13.0<br>(11.9,14.2) | 18.7<br>(15.5,21.8) | 12.0<br>(9.5,14.5)  | 13.9<br>(11.2,16.5) | 11.6<br>(9.1,14.0)  | 9.3<br>(7.1,11.5)   | 9.4<br>(4.2,12.0)   | Metropolitan |
| Women | Seoul            | Gangbuk-gu      | 15.2<br>(14.0,16.5) | 18.8<br>(15.7,22.0) | 18.5<br>(15.4,21.5) | 13.3<br>(10.7,15.9) | 13.2<br>(10.7,15.8) | 12.4<br>(9.9,14.9)  | 6.4<br>(1.5,9.7)    | Metropolitan |
| Women | Seoul            | Dobong-gu       | 15.5<br>(14.2,16.7) | 20.0<br>(16.7,23.3) | 16.8<br>(13.9,19.7) | 13.9<br>(11.3,16.5) | 12.1<br>(9.6,14.6)  | 14.7<br>(11.9,17.4) | 5.3<br>(1.2,9.6)    | Metropolitan |
| Women | Seoul            | Nowon-gu        | 16.1<br>(14.8,17.4) | 25.4<br>(21.7,29.1) | 18.9<br>(15.8,22.0) | 13.6<br>(10.9,16.3) | 11.6<br>(9.2,14.0)  | 11.0<br>(8.5,13.5)  | 14.4<br>(8.1,16.5)  | Metropolitan |
| Women | Seoul            | Eunpyeong-gu    | 15.9<br>(14.6,17.2) | 22.1<br>(18.7,25.6) | 17.5<br>(14.4,20.6) | 15.2<br>(12.4,17.9) | 12.2<br>(9.7,14.6)  | 12.8<br>(10.2,15.4) | 9.3<br>(4.5,12.7)   | Metropolitan |
| Women | Seoul            | Seodaemun-gu    | 15.5<br>(14.2,16.8) | 22.9<br>(19.4,26.4) | 16.4<br>(13.5,19.4) | 12.8<br>(10.3,15.3) | 15.2<br>(12.4,17.9) | 10.7<br>(8.4,13.0)  | 12.2<br>(8.2,16.4)  | Metropolitan |
| Women | Seoul            | Mapo-gu         | 13.8<br>(12.6,15.0) | 19.1<br>(15.8,22.3) | 17.5<br>(14.3,20.6) | 13.0<br>(10.3,15.7) | 11.0<br>(8.6,13.5)  | 8.6<br>(6.4,10.8)   | 10.5<br>(8.3,16.1)  | Metropolitan |
| Women | Seoul            | Yangcheon-gu    | 15.2<br>(13.9,16.5) | 21.9<br>(18.3,25.4) | 14.3<br>(11.4,17.2) | 13.8<br>(11.1,16.6) | 13.6<br>(10.8,16.3) | 12.8<br>(10.2,15.3) | 9.1<br>(3.1,11.3)   | Metropolitan |
| Women | Seoul            | Gangseo-gu      | 14.6<br>(13.3,15.9) | 20.9<br>(17.4,24.4) | 17.4<br>(14.3,20.6) | 14.0<br>(11.2,16.7) | 10.3<br>(7.9,12.7)  | 10.9<br>(8.5,13.4)  | 10.0<br>(6.9,15.1)  | Metropolitan |
| Women | Seoul            | Guro-gu         | 16.0<br>(14.6,17.3) | 22.1<br>(18.4,25.8) | 16.5<br>(13.5,19.6) | 16.4<br>(13.5,19.4) | 12.6<br>(9.9,15.2)  | 13.0<br>(10.2,15.7) | 9.1<br>(4.3,12.9)   | Metropolitan |
| Women | Seoul            | Geumcheon-gu    | 16.5<br>(15.2,17.8) | 23.2<br>(19.6,26.8) | 18.5<br>(15.3,21.7) | 15.2<br>(12.4,18.0) | 13.3<br>(10.6,16.0) | 12.6<br>(10.0,15.3) | 10.6<br>(3.8,12.4)  | Metropolitan |
| Women | Seoul            | Yeongdeungpo-gu | 15.4<br>(14.1,16.7) | 22.4<br>(18.8,26.0) | 17.0<br>(13.9,20.0) | 13.8<br>(11.1,16.4) | 10.9<br>(8.5,13.4)  | 13.0<br>(10.3,15.8) | 9.4<br>(6.1,14.7)   | Metropolitan |
| Women | Seoul            | Dongjak-gu      | 16.3<br>(14.9,17.6) | 20.1<br>(16.8,23.5) | 17.9<br>(14.8,21.1) | 14.7<br>(11.8,17.6) | 16.8<br>(13.8,19.7) | 12.0<br>(9.4,14.5)  | 8.1<br>(3.3,11.7)   | Metropolitan |
| Women | Seoul            | Gwanak-gu       | 16.1<br>(14.7,17.5) | 20.6<br>(17.0,24.3) | 17.0<br>(13.8,20.2) | 16.9<br>(13.7,20.0) | 13.8<br>(10.9,16.7) | 12.5<br>(9.8,15.2)  | 8.1<br>(3.5,11.7)   | Metropolitan |
| Women | Seoul            | Seocho-gu       | 10.8<br>(9.7,12.0)  | 14.4<br>(11.4,17.4) | 13.6<br>(10.7,16.5) | 10.1<br>(7.7,12.6)  | 8.4<br>(6.2,10.5)   | 8.2<br>(5.9,10.5)   | 6.2<br>(1.9,9.3)    | Metropolitan |
| Women | Seoul            | Gangnam-gu      | 11.1<br>(9.9,12.3)  | 16.9<br>(13.6,20.2) | 12.9<br>(10.1,15.7) | 9.6<br>(7.1,12.0)   | 9.1<br>(6.8,11.3)   | 7.4<br>(5.3,9.5)    | 9.5<br>(6.2,13.6)   | Metropolitan |

|       |         |              |                     |                     |                     |                     |                     |                     |                     |              |
|-------|---------|--------------|---------------------|---------------------|---------------------|---------------------|---------------------|---------------------|---------------------|--------------|
| Women | Seoul   | Songpa-gu    | 11.8<br>(10.6,13.0) | 13.5<br>(10.5,16.4) | 10.7<br>(8.1,13.2)  | 12.4<br>(9.7,15.1)  | 11.4<br>(8.9,13.9)  | 11.0<br>(8.4,13.7)  | 2.5<br>(0.9,8.3)    | Metropolitan |
| Women | Seoul   | Gangdong-gu  | 14.5<br>(13.2,15.8) | 17.8<br>(14.5,21.2) | 17.8<br>(14.6,21.0) | 13.7<br>(10.9,16.4) | 12.2<br>(9.5,15.0)  | 11.0<br>(8.4,13.7)  | 6.8<br>(3.1,11.1)   | Metropolitan |
| Women | Busan   | Jung-gu      | 16.5<br>(15.3,17.8) | 21.2<br>(17.9,24.4) | 19.1<br>(16.2,22.0) | 16.9<br>(14.0,19.7) | 14.2<br>(11.7,16.8) | 11.2<br>(9.0,13.5)  | 10.0<br>(4.3,12.7)  | Metropolitan |
| Women | Busan   | Seo-gu       | 16.0<br>(14.8,17.3) | 24.7<br>(21.2,28.3) | 15.0<br>(12.4,17.7) | 16.1<br>(13.4,18.8) | 13.8<br>(11.4,16.2) | 11.0<br>(8.7,13.2)  | 13.7<br>(7.4,16.2)  | Metropolitan |
| Women | Busan   | Dong-gu      | 20.4<br>(19.0,21.8) | 31.3<br>(27.3,35.3) | 20.9<br>(17.8,24.1) | 18.9<br>(16.1,21.8) | 16.5<br>(13.8,19.2) | 14.7<br>(12.1,17.3) | 16.6<br>(10.8,20.0) | Metropolitan |
| Women | Busan   | Yeongdo-gu   | 19.1<br>(17.8,20.4) | 27.9<br>(24.1,31.6) | 19.8<br>(16.8,22.8) | 18.2<br>(15.4,21.0) | 15.9<br>(13.2,18.6) | 14.2<br>(11.8,16.6) | 13.7<br>(8.4,17.8)  | Metropolitan |
| Women | Busan   | Busanjin-gu  | 17.5<br>(16.2,18.8) | 25.4<br>(21.9,28.9) | 18.1<br>(15.1,21.2) | 15.5<br>(12.8,18.3) | 14.7<br>(12.1,17.3) | 13.9<br>(11.3,16.5) | 11.5<br>(8.4,17.2)  | Metropolitan |
| Women | Busan   | Dongnae-gu   | 15.2<br>(14.0,16.4) | 21.9<br>(18.5,25.2) | 16.0<br>(13.2,18.8) | 13.4<br>(10.8,15.9) | 13.9<br>(11.3,16.5) | 10.6<br>(8.2,13.0)  | 11.3<br>(6.6,14.8)  | Metropolitan |
| Women | Busan   | Nam-gu       | 16.8<br>(15.5,18.1) | 22.1<br>(18.2,25.6) | 18.7<br>(15.7,21.7) | 17.1<br>(14.2,20.0) | 15.0<br>(12.3,17.7) | 11.8<br>(9.3,14.2)  | 10.3<br>(5.9,14.5)  | Metropolitan |
| Women | Busan   | Buk-gu       | 17.0<br>(15.6,18.4) | 25.8<br>(21.9,29.8) | 17.8<br>(14.6,20.9) | 17.8<br>(14.6,21.0) | 11.9<br>(9.4,14.5)  | 12.0<br>(9.4,14.7)  | 13.8<br>(9.9,18.5)  | Metropolitan |
| Women | Busan   | Haeundae-gu  | 16.7<br>(15.4,18.0) | 28.3<br>(24.4,32.1) | 16.9<br>(13.9,19.9) | 13.9<br>(11.3,16.5) | 14.9<br>(12.1,17.7) | 9.9<br>(7.6,12.1)   | 18.4<br>(14.8,23.6) | Metropolitan |
| Women | Busan   | Saha-gu      | 15.8<br>(14.5,17.0) | 23.4<br>(19.7,27.1) | 16.1<br>(13.2,19.0) | 14.4<br>(11.7,17.2) | 12.7<br>(10.1,15.3) | 12.6<br>(10.1,15.2) | 10.8<br>(7.0,15.8)  | Metropolitan |
| Women | Busan   | Geumjeong-gu | 15.0<br>(13.8,16.2) | 22.5<br>(19.0,26.0) | 16.7<br>(13.9,19.6) | 15.9<br>(12.9,18.8) | 12.7<br>(10.3,15.2) | 8.0<br>(6.1,10.0)   | 14.5<br>(8.7,16.9)  | Metropolitan |
| Women | Busan   | Gangseo-gu   | 18.8<br>(17.5,20.2) | 24.3<br>(20.7,27.8) | 22.0<br>(18.7,25.2) | 16.1<br>(13.2,18.9) | 15.8<br>(13.0,18.5) | 16.1<br>(13.3,18.9) | 8.2<br>(4.8,13.8)   | Metropolitan |
| Women | Busan   | Yeonje-gu    | 17.0<br>(15.6,18.3) | 26.7<br>(23.0,30.4) | 17.7<br>(14.6,20.7) | 14.2<br>(11.5,16.9) | 13.1<br>(10.6,15.7) | 13.2<br>(10.5,15.8) | 13.5<br>(9.1,17.9)  | Metropolitan |
| Women | Busan   | Suyeong-gu   | 15.7<br>(14.5,17.0) | 21.7<br>(18.4,25.0) | 17.8<br>(14.9,20.7) | 13.7<br>(11.1,16.3) | 12.9<br>(10.5,15.3) | 12.5<br>(10.1,15.0) | 9.2<br>(4.3,12.9)   | Metropolitan |
| Women | Busan   | Sasang-gu    | 18.7<br>(17.2,20.2) | 25.4<br>(21.4,29.4) | 20.9<br>(17.5,24.4) | 17.2<br>(14.1,20.3) | 15.3<br>(12.4,18.3) | 15.2<br>(12.1,18.2) | 10.2<br>(5.4,14.6)  | Metropolitan |
| Women | Busan   | Gijang-gun   | 19.9<br>(18.5,21.2) | 25.1<br>(21.6,28.7) | 23.9<br>(20.5,27.3) | 18.8<br>(15.8,21.8) | 16.6<br>(13.8,19.4) | 14.8<br>(12.1,17.5) | 10.3<br>(6.7,15.9)  | Rural        |
| Women | Daegu   | Jung-gu      | 17.7<br>(16.4,19.0) | 26.5<br>(22.7,30.2) | 17.9<br>(15.0,20.7) | 15.7<br>(13.0,18.4) | 14.7<br>(12.0,17.3) | 14.2<br>(11.5,16.8) | 12.3<br>(8.5,17.7)  | Metropolitan |
| Women | Daegu   | Dong-gu      | 19.6<br>(18.2,21.0) | 27.2<br>(23.5,31.0) | 18.1<br>(15.1,21.2) | 20.7<br>(17.5,23.8) | 18.0<br>(15.0,21.0) | 14.4<br>(11.8,17.1) | 12.8<br>(8.3,17.3)  | Metropolitan |
| Women | Daegu   | Seo-gu       | 20.4<br>(19.0,21.9) | 28.6<br>(24.6,32.5) | 19.7<br>(16.5,22.8) | 18.3<br>(15.3,21.4) | 19.9<br>(16.7,23.1) | 16.0<br>(13.1,18.8) | 12.6<br>(2.3,11.9)  | Metropolitan |
| Women | Daegu   | Nam-gu       | 17.8<br>(16.5,19.1) | 24.0<br>(20.5,27.5) | 20.5<br>(17.3,23.7) | 17.4<br>(14.6,20.2) | 14.9<br>(12.2,17.7) | 12.6<br>(10.1,15.0) | 11.4<br>(8.8,17.4)  | Metropolitan |
| Women | Daegu   | Buk-gu       | 16.3<br>(14.9,17.6) | 23.5<br>(19.7,27.2) | 16.9<br>(13.8,20.0) | 17.4<br>(14.2,20.6) | 12.4<br>(9.8,15.1)  | 11.4<br>(8.8,13.9)  | 12.1<br>(8.9,17.7)  | Metropolitan |
| Women | Daegu   | Suseong-gu   | 17.8<br>(16.4,19.2) | 27.7<br>(23.7,31.7) | 19.1<br>(15.9,22.3) | 17.2<br>(14.2,20.2) | 13.3<br>(10.6,15.9) | 12.4<br>(9.8,15.0)  | 15.3<br>(10.0,19.0) | Metropolitan |
| Women | Daegu   | Dalseo-gu    | 17.9<br>(16.5,19.4) | 24.6<br>(20.8,28.5) | 19.7<br>(16.3,23.2) | 16.9<br>(13.7,20.1) | 15.3<br>(12.3,18.2) | 13.5<br>(10.6,16.3) | 11.1<br>(7.7,16.5)  | Metropolitan |
| Women | Daegu   | Dalseong-gun | 19.5<br>(18.0,20.9) | 27.5<br>(23.5,31.5) | 19.7<br>(16.5,23.0) | 17.1<br>(14.1,20.1) | 14.7<br>(11.9,17.5) | 18.6<br>(15.4,21.7) | 8.9<br>(3.9,13.5)   | Rural        |
| Women | Incheon | Jung-gu      | 16.5<br>(15.2,17.8) | 23.4<br>(19.8,27.0) | 15.3<br>(12.5,18.1) | 16.5<br>(13.6,19.4) | 13.3<br>(10.8,15.9) | 14.2<br>(11.5,17.0) | 9.2<br>(4.8,13.8)   | Metropolitan |
| Women | Incheon | Dong-gu      | 15.5<br>(14.2,16.7) | 20.8<br>(17.5,24.1) | 16.2<br>(13.4,19.0) | 14.9<br>(12.2,17.6) | 13.1<br>(10.7,15.6) | 12.6<br>(10.1,15.1) | 8.2<br>(3.2,11.8)   | Metropolitan |
| Women | Incheon | Nam-gu       | 14.1<br>(12.9,15.3) | 20.0<br>(16.6,23.4) | 14.9<br>(12.1,17.8) | 13.1<br>(10.5,15.8) | 12.2<br>(9.7,14.6)  | 10.7<br>(8.3,13.0)  | 9.3<br>(5.8,14.0)   | Metropolitan |
| Women | Incheon | Yeonsu-gu    | 15.6<br>(14.2,17.0) | 24.7<br>(20.7,28.7) | 16.0<br>(12.8,19.2) | 14.6<br>(11.6,17.6) | 13.0<br>(10.2,15.8) | 10.0<br>(7.5,12.5)  | 14.7<br>(9.7,17.9)  | Metropolitan |
| Women | Incheon | Namdong-gu   | 16.8<br>(15.4,18.2) | 23.3<br>(19.5,27.0) | 17.5<br>(14.3,20.7) | 17.3<br>(14.2,20.4) | 12.4<br>(9.8,15.1)  | 13.3<br>(10.5,16.0) | 10.0<br>(5.3,13.7)  | Metropolitan |
| Women | Incheon | Bupyeong-gu  | 17.0<br>(15.6,18.4) | 23.9<br>(20.0,27.7) | 17.9<br>(14.7,21.1) | 16.8<br>(13.7,20.0) | 13.9<br>(11.2,16.5) | 13.3<br>(10.6,16.1) | 10.6<br>(6.3,14.9)  | Metropolitan |
| Women | Incheon | Gyeyang-gu   | 16.8<br>(15.4,18.3) | 23.3<br>(19.3,27.3) | 19.4<br>(15.9,22.8) | 14.1<br>(11.1,17.0) | 14.1<br>(11.2,17.0) | 13.9<br>(10.9,16.9) | 9.4<br>(4.5,13.1)   | Metropolitan |
| Women | Incheon | Seo-gu       | 18.8<br>(17.3,20.4) | 24.1<br>(20.0,28.1) | 19.9<br>(16.3,23.5) | 18.3<br>(14.8,21.9) | 16.7<br>(13.5,19.9) | 15.3<br>(12.0,18.5) | 8.8<br>(2.4,12.0)   | Metropolitan |
| Women | Incheon | Ganghwa-gun  | 18.4<br>(17.1,19.8) | 23.3<br>(19.7,26.9) | 19.1<br>(16.0,22.2) | 19.1<br>(16.1,22.2) | 15.2<br>(12.6,17.8) | 15.6<br>(12.8,18.5) | 7.7<br>(2.6,11.6)   | Rural        |
| Women | Incheon | Ongjin-gun   | 13.8<br>(12.6,15.0) | 16.5<br>(13.6,19.4) | 15.1<br>(12.4,17.9) | 12.0<br>(9.6,14.5)  | 12.1<br>(9.8,14.4)  | 13.3<br>(10.6,16.0) | 3.2<br>(0.8,9.8)    | Rural        |
| Women | Gwangju | Dong-gu      | 16.4<br>(15.1,17.6) | 24.9<br>(21.2,28.5) | 17.7<br>(14.8,20.6) | 16.4<br>(13.6,19.2) | 12.5<br>(10.2,14.8) | 11.5<br>(9.2,13.9)  | 13.4<br>(9.4,18.0)  | Metropolitan |

|       |             |                |                     |                     |                     |                     |                     |                     |                    |              |
|-------|-------------|----------------|---------------------|---------------------|---------------------|---------------------|---------------------|---------------------|--------------------|--------------|
| Women | Gwangju     | Seo-gu         | 15.9<br>(14.6,17.3) | 23.1<br>(19.4,26.8) | 17.5<br>(14.3,20.6) | 12.3<br>(9.6,15.0)  | 14.9<br>(12.0,17.8) | 12.4<br>(9.8,15.1)  | 10.7<br>(4.8,13.6) | Metropolitan |
| Women | Gwangju     | Nam-gu         | 17.1<br>(15.8,18.5) | 24.4<br>(20.7,28.1) | 17.6<br>(14.5,20.7) | 17.2<br>(14.4,20.0) | 14.4<br>(11.7,17.1) | 12.3<br>(9.9,14.7)  | 12.1<br>(8.4,17.0) | Metropolitan |
| Women | Gwangju     | Buk-gu         | 17.3<br>(15.9,18.7) | 26.1<br>(22.3,29.9) | 16.4<br>(13.4,19.4) | 18.2<br>(15.1,21.4) | 14.7<br>(11.8,17.5) | 11.6<br>(9.0,14.1)  | 14.5<br>(6.9,15.3) | Metropolitan |
| Women | Gwangju     | Gwangsan-gu    | 17.9<br>(16.4,19.5) | 26.5<br>(22.2,30.9) | 18.8<br>(15.4,22.2) | 17.1<br>(13.8,20.5) | 14.5<br>(11.4,17.5) | 13.2<br>(10.3,16.2) | 13.3<br>(5.6,14.6) | Metropolitan |
| Women | Daejeon     | Dong-gu        | 16.4<br>(15.1,17.7) | 25.3<br>(21.5,29.2) | 18.9<br>(15.8,21.9) | 13.9<br>(11.3,16.6) | 13.9<br>(11.3,16.5) | 10.9<br>(8.6,13.3)  | 14.4<br>(9.4,18.0) | Metropolitan |
| Women | Daejeon     | Jung-gu        | 14.7<br>(13.4,15.9) | 22.2<br>(18.7,25.8) | 14.1<br>(11.5,16.7) | 14.6<br>(11.8,17.3) | 13.0<br>(10.4,15.5) | 10.4<br>(8.1,12.6)  | 11.8<br>(6.9,15.3) | Metropolitan |
| Women | Daejeon     | Seo-gu         | 16.0<br>(14.6,17.4) | 23.2<br>(19.2,27.1) | 16.3<br>(13.2,19.5) | 14.2<br>(11.2,17.2) | 14.3<br>(11.3,17.2) | 12.3<br>(9.5,15.2)  | 10.9<br>(8.6,17.2) | Metropolitan |
| Women | Daejeon     | Yuseong-gu     | 13.7<br>(12.4,15.1) | 18.3<br>(14.7,21.9) | 16.9<br>(13.4,20.3) | 10.9<br>(8.2,13.5)  | 13.0<br>(10.1,16.0) | 9.4<br>(6.7,12.1)   | 8.9<br>(5.6,13.8)  | Metropolitan |
| Women | Daejeon     | Daedeok-gu     | 16.2<br>(14.8,17.5) | 21.4<br>(17.8,25.0) | 17.5<br>(14.4,20.6) | 14.2<br>(11.3,17.0) | 14.5<br>(11.6,17.4) | 13.0<br>(10.2,15.8) | 8.4<br>(3.5,11.9)  | Metropolitan |
| Women | Ulsan       | Jung-gu        | 17.1<br>(15.6,18.5) | 22.9<br>(19.2,26.7) | 17.3<br>(14.1,20.4) | 15.6<br>(12.6,18.7) | 14.7<br>(11.9,17.6) | 15.1<br>(12.0,18.2) | 7.8<br>(2.6,11.4)  | Metropolitan |
| Women | Ulsan       | Nam-gu         | 15.1<br>(13.7,16.6) | 21.2<br>(17.0,25.4) | 15.6<br>(12.4,18.8) | 13.4<br>(10.2,16.5) | 13.3<br>(10.4,16.2) | 13.0<br>(9.8,16.2)  | 8.2<br>(5.2,13.6)  | Metropolitan |
| Women | Ulsan       | Dong-gu        | 14.6<br>(13.1,16.0) | 21.2<br>(17.1,25.3) | 17.4<br>(13.7,21.0) | 13.1<br>(10.0,16.2) | 10.9<br>(8.1,13.7)  | 10.4<br>(7.5,13.3)  | 10.8<br>(6.8,15.2) | Metropolitan |
| Women | Ulsan       | Buk-gu         | 13.8<br>(12.4,15.3) | 16.8<br>(13.0,20.6) | 16.0<br>(12.6,19.4) | 15.4<br>(12.0,18.8) | 12.1<br>(9.1,15.1)  | 8.8<br>(6.2,11.4)   | 8.0<br>(5.5,13.3)  | Metropolitan |
| Women | Ulsan       | Ulju-gun       | 19.1<br>(17.7,20.5) | 26.3<br>(22.4,30.1) | 20.4<br>(17.1,23.6) | 17.4<br>(14.4,20.5) | 16.0<br>(13.2,18.8) | 16.1<br>(13.2,19.0) | 10.2<br>(7.0,16.2) | Rural        |
| Women | Sejong      | Sejong         | 18.3<br>(16.9,19.6) | 23.5<br>(20.0,27.0) | 20.7<br>(17.5,23.9) | 18.1<br>(15.1,21.0) | 15.4<br>(12.7,18.0) | 14.1<br>(11.5,16.6) | 9.4<br>(5.1,13.9)  | Metropolitan |
| Women | Gyeonggi-do | Jangan-gu      | 15.6<br>(14.3,17.0) | 18.6<br>(15.3,21.9) | 18.5<br>(15.2,21.7) | 14.0<br>(11.1,16.9) | 14.7<br>(11.8,17.6) | 12.0<br>(9.3,14.7)  | 6.6<br>(2.5,10.9)  | Metropolitan |
| Women | Gyeonggi-do | Gwonseon-gu    | 16.4<br>(15.0,17.9) | 22.5<br>(18.6,26.4) | 17.5<br>(14.1,20.8) | 15.1<br>(12.0,18.1) | 14.0<br>(11.0,17.0) | 13.3<br>(10.3,16.3) | 9.2<br>(3.0,12.0)  | Metropolitan |
| Women | Gyeonggi-do | Paldal-gu      | 16.4<br>(15.0,17.8) | 23.7<br>(19.9,27.5) | 17.7<br>(14.4,20.9) | 14.4<br>(11.6,17.2) | 13.4<br>(10.7,16.2) | 13.4<br>(10.5,16.3) | 10.3<br>(7.0,16.0) | Metropolitan |
| Women | Gyeonggi-do | Yeongtong-gu   | 12.5<br>(11.0,13.9) | 17.3<br>(13.4,21.3) | 11.0<br>(8.1,13.9)  | 10.4<br>(7.4,13.4)  | 12.5<br>(9.1,15.8)  | 11.5<br>(8.3,14.6)  | 5.8<br>(1.0,9.4)   | Metropolitan |
| Women | Gyeonggi-do | Sujeong-gu     | 17.2<br>(15.8,18.6) | 23.3<br>(19.6,27.1) | 18.7<br>(15.4,21.9) | 15.1<br>(12.1,18.0) | 16.2<br>(13.2,19.2) | 13.0<br>(10.1,15.8) | 10.3<br>(7.2,16.2) | Metropolitan |
| Women | Gyeonggi-do | Jungwon-gu     | 18.9<br>(17.4,20.4) | 24.8<br>(20.9,28.7) | 20.6<br>(17.2,24.1) | 17.1<br>(13.9,20.3) | 16.3<br>(13.3,19.4) | 16.1<br>(12.9,19.2) | 8.7<br>(5.8,15.2)  | Metropolitan |
| Women | Gyeonggi-do | Bundang-gu     | 9.6<br>(8.5,10.6)   | 12.6<br>(9.8,15.3)  | 10.7<br>(8.2,13.3)  | 6.9<br>(4.9,8.9)    | 9.1<br>(6.8,11.4)   | 8.5<br>(6.2,10.8)   | 4.1<br>(0.6,7.4)   | Metropolitan |
| Women | Gyeonggi-do | Uijeongbu-si   | 16.8<br>(15.5,18.1) | 25.5<br>(21.7,29.3) | 19.9<br>(16.6,23.1) | 14.0<br>(11.3,16.6) | 13.3<br>(10.7,15.9) | 12.3<br>(9.8,14.8)  | 13.2<br>(8.8,17.4) | Urban        |
| Women | Gyeonggi-do | Manan-gu       | 15.8<br>(14.4,17.1) | 21.6<br>(18.0,25.2) | 15.8<br>(12.8,18.8) | 14.4<br>(11.6,17.1) | 13.9<br>(11.2,16.7) | 13.6<br>(10.9,16.3) | 8.0<br>(5.4,14.0)  | Metropolitan |
| Women | Gyeonggi-do | Dongan-gu      | 13.6<br>(12.3,14.9) | 17.4<br>(14.1,20.7) | 14.7<br>(11.6,17.7) | 13.4<br>(10.6,16.1) | 11.2<br>(8.6,13.8)  | 11.4<br>(8.8,14.1)  | 6.0<br>(1.2,9.2)   | Metropolitan |
| Women | Gyeonggi-do | Wonmi-gu       | 16.3<br>(14.8,17.7) | 22.4<br>(18.5,26.3) | 18.2<br>(14.6,21.9) | 14.9<br>(12.0,17.9) | 13.8<br>(10.8,16.8) | 12.6<br>(9.7,15.4)  | 9.8<br>(4.0,12.6)  | Metropolitan |
| Women | Gyeonggi-do | Sosa-gu        | 16.0<br>(14.6,17.3) | 21.6<br>(17.9,25.3) | 16.4<br>(13.2,19.5) | 15.7<br>(12.7,18.7) | 14.3<br>(11.5,17.2) | 12.1<br>(9.5,14.7)  | 9.5<br>(5.9,14.7)  | Metropolitan |
| Women | Gyeonggi-do | Ojeong-gu      | 16.9<br>(15.5,18.3) | 25.0<br>(21.0,28.9) | 18.4<br>(15.2,21.6) | 12.9<br>(10.2,15.6) | 13.0<br>(10.3,15.8) | 15.4<br>(12.4,18.5) | 9.6<br>(5.0,14.0)  | Metropolitan |
| Women | Gyeonggi-do | Gwangmyeong-si | 15.8<br>(14.4,17.2) | 22.0<br>(18.2,25.7) | 17.8<br>(14.7,21.0) | 12.5<br>(9.8,15.3)  | 11.9<br>(9.2,14.5)  | 15.1<br>(12.1,18.1) | 6.9<br>(5.0,13.8)  | Urban        |
| Women | Gyeonggi-do | Pyeongtaek-si  | 17.0<br>(16.0,18.0) | 24.2<br>(21.6,26.8) | 16.9<br>(14.8,19.1) | 15.9<br>(13.8,18.0) | 14.7<br>(12.7,16.7) | 13.4<br>(11.6,15.3) | 10.8<br>(8.2,14.6) | Urban        |
| Women | Gyeonggi-do | Dongducheon-si | 18.7<br>(17.3,20.1) | 27.1<br>(23.3,31.0) | 19.2<br>(16.0,22.4) | 16.9<br>(13.9,19.8) | 17.2<br>(14.3,20.2) | 13.4<br>(10.8,16.0) | 13.7<br>(8.4,17.6) | Urban        |
| Women | Gyeonggi-do | Sangnok-gu     | 15.7<br>(14.2,17.1) | 21.3<br>(17.6,25.1) | 17.6<br>(14.2,21.1) | 15.0<br>(11.9,18.0) | 12.6<br>(9.8,15.4)  | 12.0<br>(9.2,14.8)  | 9.3<br>(7.4,15.8)  | Metropolitan |
| Women | Gyeonggi-do | Danwon-gu      | 17.9<br>(16.3,19.4) | 26.3<br>(21.9,30.7) | 17.5<br>(14.1,21.0) | 16.8<br>(13.5,20.2) | 14.7<br>(11.5,18.0) | 14.4<br>(11.2,17.5) | 11.9<br>(7.9,17.1) | Metropolitan |
| Women | Gyeonggi-do | Deogyang-gu    | 17.2<br>(15.9,18.6) | 24.4<br>(20.7,28.2) | 18.9<br>(15.8,22.0) | 15.9<br>(12.9,18.9) | 13.9<br>(11.2,16.6) | 13.0<br>(10.3,15.7) | 11.4<br>(4.7,13.3) | Metropolitan |
| Women | Gyeonggi-do | Ilsandong-gu   | 14.8<br>(13.4,16.1) | 19.2<br>(15.7,22.6) | 15.8<br>(12.7,18.8) | 14.8<br>(11.9,17.7) | 13.4<br>(10.7,16.1) | 10.8<br>(8.3,13.4)  | 8.4<br>(3.6,11.6)  | Metropolitan |
| Women | Gyeonggi-do | Ilsanseo-gu    | 13.4<br>(12.2,14.7) | 19.3<br>(15.9,22.8) | 13.2<br>(10.4,16.0) | 10.5<br>(8.0,13.1)  | 11.0<br>(8.5,13.4)  | 12.9<br>(10.1,15.7) | 6.4<br>(-0.1,8.1)  | Metropolitan |
| Women | Gyeonggi-do | Gwacheon-si    | 14.2<br>(13.0,15.5) | 19.5<br>(16.1,22.9) | 14.1<br>(11.3,16.9) | 13.6<br>(10.9,16.3) | 12.3<br>(9.7,15.0)  | 11.9<br>(9.3,14.5)  | 7.6<br>(2.8,11.2)  | Urban        |

|       |             |                 |                     |                     |                     |                     |                     |                     |                     |              |
|-------|-------------|-----------------|---------------------|---------------------|---------------------|---------------------|---------------------|---------------------|---------------------|--------------|
| Women | Gyeonggi-do | Guri-si         | 16.9<br>(15.5,18.3) | 22.6<br>(19.0,26.3) | 16.8<br>(13.6,19.9) | 17.1<br>(13.9,20.3) | 15.9<br>(12.8,18.9) | 11.8<br>(9.1,14.5)  | 10.8<br>(3.7,12.5)  | Urban        |
| Women | Gyeonggi-do | Namyangju-si    | 16.0<br>(14.7,17.4) | 20.0<br>(16.6,23.3) | 17.6<br>(14.4,20.7) | 14.5<br>(11.8,17.3) | 13.4<br>(10.7,16.1) | 15.3<br>(12.3,18.2) | 4.7<br>(2.1,10.7)   | Urban        |
| Women | Gyeonggi-do | Osan-si         | 15.8<br>(14.3,17.3) | 18.8<br>(15.1,22.5) | 15.5<br>(12.0,19.0) | 15.4<br>(12.2,18.5) | 15.8<br>(12.4,19.1) | 13.8<br>(10.5,17.0) | 5.0<br>(-0.3,8.5)   | Urban        |
| Women | Gyeonggi-do | Siheung-si      | 17.4<br>(15.8,18.9) | 20.6<br>(16.8,24.5) | 18.9<br>(15.5,22.4) | 17.1<br>(13.8,20.4) | 17.4<br>(14.0,20.8) | 12.4<br>(9.4,15.3)  | 8.2<br>(2.3,11.1)   | Urban        |
| Women | Gyeonggi-do | Gunpo-si        | 16.5<br>(15.1,17.9) | 24.7<br>(20.8,28.6) | 15.4<br>(12.4,18.5) | 14.1<br>(11.3,17.0) | 14.5<br>(11.6,17.4) | 13.7<br>(10.7,16.6) | 11.0<br>(6.7,15.5)  | Urban        |
| Women | Gyeonggi-do | Uiwang-si       | 15.0<br>(13.6,16.3) | 21.1<br>(17.5,24.8) | 16.0<br>(12.9,19.1) | 12.6<br>(9.9,15.3)  | 12.5<br>(9.8,15.2)  | 12.8<br>(10.1,15.6) | 8.3<br>(4.3,12.9)   | Urban        |
| Women | Gyeonggi-do | Hanam-si        | 16.0<br>(14.7,17.4) | 19.6<br>(16.2,23.0) | 17.5<br>(14.4,20.7) | 15.4<br>(12.5,18.3) | 13.8<br>(11.1,16.4) | 14.4<br>(11.6,17.2) | 5.2<br>(3.0,11.6)   | Urban        |
| Women | Gyeonggi-do | Cheoin-gu       | 15.5<br>(14.2,16.8) | 21.3<br>(17.8,24.8) | 15.0<br>(12.2,17.9) | 16.8<br>(13.7,19.9) | 13.1<br>(10.5,15.8) | 11.4<br>(8.9,14.0)  | 9.9<br>(1.6,10.0)   | Metropolitan |
| Women | Gyeonggi-do | Giheung-gu      | 13.1<br>(11.8,14.3) | 18.0<br>(14.7,21.4) | 12.9<br>(10.1,15.7) | 12.4<br>(9.6,15.1)  | 11.7<br>(9.0,14.4)  | 10.3<br>(7.8,12.9)  | 7.7<br>(4.0,11.8)   | Metropolitan |
| Women | Gyeonggi-do | Suji-gu         | 11.6<br>(10.4,12.7) | 13.5<br>(10.5,16.4) | 10.5<br>(8.0,12.9)  | 13.0<br>(10.1,15.8) | 9.9<br>(7.4,12.4)   | 11.6<br>(9.0,14.2)  | 1.9<br>(-2.2,5.2)   | Metropolitan |
| Women | Gyeonggi-do | Paju-si         | 16.5<br>(15.1,17.8) | 23.5<br>(19.8,27.2) | 17.1<br>(14.1,20.2) | 15.2<br>(12.4,18.0) | 12.1<br>(9.6,14.6)  | 14.9<br>(12.1,17.7) | 8.6<br>(3.2,12.0)   | Urban        |
| Women | Gyeonggi-do | Icheon-si       | 17.6<br>(16.2,19.0) | 25.0<br>(21.2,28.8) | 19.4<br>(16.2,22.7) | 14.3<br>(11.5,17.1) | 15.3<br>(12.4,18.3) | 13.9<br>(11.1,16.7) | 11.1<br>(6.4,15.4)  | Urban        |
| Women | Gyeonggi-do | Anseong-si      | 17.5<br>(16.1,18.8) | 22.9<br>(19.5,26.3) | 17.9<br>(14.9,20.9) | 16.0<br>(13.2,18.9) | 16.1<br>(13.3,19.0) | 14.4<br>(11.7,17.2) | 8.5<br>(3.8,12.4)   | Urban        |
| Women | Gyeonggi-do | Gimpo-si        | 13.1<br>(11.9,14.3) | 15.6<br>(12.6,18.7) | 14.3<br>(11.4,17.1) | 12.2<br>(9.6,14.8)  | 12.5<br>(9.9,15.1)  | 11.2<br>(8.7,13.7)  | 4.4<br>(-0.5,7.3)   | Urban        |
| Women | Gyeonggi-do | Hwaseong-si     | 15.3<br>(13.9,16.7) | 21.3<br>(17.7,24.9) | 16.3<br>(13.1,19.4) | 14.6<br>(11.6,17.6) | 14.8<br>(11.9,17.8) | 9.5<br>(7.1,12.0)   | 11.8<br>(8.1,16.3)  | Urban        |
| Women | Gyeonggi-do | Gwangju-si      | 14.2<br>(12.9,15.5) | 18.5<br>(15.2,21.9) | 15.6<br>(12.7,18.6) | 13.6<br>(10.8,16.4) | 11.0<br>(8.5,13.4)  | 12.2<br>(9.5,14.9)  | 6.3<br>(2.3,10.7)   | Urban        |
| Women | Gyeonggi-do | Yangju-si       | 17.4<br>(16.0,18.8) | 22.6<br>(18.9,26.3) | 19.1<br>(15.8,22.3) | 15.6<br>(12.7,18.4) | 16.6<br>(13.7,19.4) | 13.7<br>(10.9,16.5) | 8.9<br>(5.3,14.3)   | Urban        |
| Women | Gyeonggi-do | Pocheon-si      | 18.6<br>(17.2,19.9) | 24.5<br>(20.9,28.1) | 21.3<br>(18.0,24.7) | 16.5<br>(13.6,19.4) | 16.8<br>(14.0,19.6) | 13.8<br>(11.2,16.5) | 10.7<br>(4.7,13.7)  | Urban        |
| Women | Gyeonggi-do | Yeoju-gun       | 18.8<br>(17.5,20.2) | 22.4<br>(19.0,25.9) | 22.0<br>(18.7,25.2) | 17.8<br>(14.9,20.8) | 16.0<br>(13.2,18.8) | 15.9<br>(13.1,18.8) | 6.5<br>(1.6,10.4)   | Urban        |
| Women | Gyeonggi-do | Yeoncheon-gun   | 17.4<br>(16.1,18.7) | 23.0<br>(19.6,26.5) | 18.0<br>(15.1,20.8) | 18.3<br>(15.4,21.3) | 16.0<br>(13.3,18.7) | 11.7<br>(9.5,14.0)  | 11.3<br>(7.7,16.5)  | Rural        |
| Women | Gyeonggi-do | Gapyeong-gun    | 16.7<br>(15.5,18.0) | 24.1<br>(20.6,27.6) | 19.0<br>(16.0,22.0) | 15.3<br>(12.6,18.0) | 12.6<br>(10.2,14.9) | 12.4<br>(10.0,14.9) | 11.7<br>(8.4,17.2)  | Rural        |
| Women | Gyeonggi-do | Yangpyeong-gun  | 18.2<br>(16.8,19.5) | 21.6<br>(18.3,24.9) | 20.2<br>(17.1,23.3) | 18.0<br>(15.1,21.0) | 16.9<br>(14.1,19.8) | 13.9<br>(11.3,16.5) | 7.7<br>(2.7,11.5)   | Rural        |
| Women | Gangwon-do  | Chuncheon-si    | 15.5<br>(14.2,16.7) | 22.5<br>(19.0,26.0) | 17.5<br>(14.6,20.5) | 13.8<br>(11.2,16.4) | 13.4<br>(10.9,15.9) | 10.7<br>(8.4,13.0)  | 11.8<br>(7.9,16.3)  | Urban        |
| Women | Gangwon-do  | Wonju-si        | 17.2<br>(15.8,18.6) | 24.0<br>(20.3,27.8) | 21.2<br>(17.8,24.5) | 13.9<br>(11.2,16.6) | 14.9<br>(12.1,17.8) | 12.2<br>(9.6,14.8)  | 11.8<br>(7.0,16.2)  | Urban        |
| Women | Gangwon-do  | Gangneung-si    | 16.5<br>(15.3,17.8) | 22.9<br>(19.5,26.4) | 18.5<br>(15.6,21.4) | 14.3<br>(11.7,16.9) | 14.2<br>(11.6,16.7) | 13.3<br>(10.6,15.9) | 9.6<br>(6.3,15.1)   | Urban        |
| Women | Gangwon-do  | Donghae-si      | 17.5<br>(16.2,18.8) | 24.4<br>(20.8,28.1) | 19.4<br>(16.4,22.3) | 16.5<br>(13.6,19.4) | 14.6<br>(12.0,17.2) | 12.7<br>(10.2,15.2) | 11.7<br>(8.5,17.3)  | Urban        |
| Women | Gangwon-do  | Taebaek-si      | 21.8<br>(20.4,23.3) | 30.2<br>(26.2,34.1) | 23.9<br>(20.4,27.4) | 21.6<br>(18.5,24.8) | 17.3<br>(14.4,20.2) | 16.2<br>(13.4,19.0) | 14.0<br>(10.4,20.2) | Urban        |
| Women | Gangwon-do  | Sokcho-si       | 19.1<br>(17.7,20.5) | 27.1<br>(23.4,30.8) | 19.3<br>(16.2,22.3) | 16.5<br>(13.7,19.2) | 15.5<br>(12.8,18.2) | 17.4<br>(14.5,20.4) | 9.7<br>(4.8,14.0)   | Urban        |
| Women | Gangwon-do  | Samcheok-si     | 19.2<br>(17.8,20.6) | 28.5<br>(24.5,32.4) | 19.5<br>(16.5,22.6) | 19.9<br>(16.8,23.0) | 15.1<br>(12.4,17.8) | 13.6<br>(11.0,16.2) | 14.9<br>(9.8,19.2)  | Urban        |
| Women | Gangwon-do  | Hongcheon-gun   | 17.3<br>(16.0,18.6) | 24.5<br>(20.8,28.2) | 19.9<br>(16.9,23.0) | 15.2<br>(12.7,17.8) | 13.2<br>(10.7,15.7) | 14.4<br>(11.7,17.0) | 10.1<br>(5.4,14.8)  | Rural        |
| Women | Gangwon-do  | Hoengseong-gun  | 20.1<br>(18.6,21.6) | 27.2<br>(23.2,31.2) | 21.5<br>(18.3,24.8) | 19.7<br>(16.5,22.8) | 17.7<br>(14.6,20.8) | 14.6<br>(11.8,17.4) | 12.6<br>(7.4,16.8)  | Rural        |
| Women | Gangwon-do  | Yeongwol-gun    | 21.6<br>(20.1,23.0) | 30.9<br>(26.6,35.2) | 23.9<br>(20.6,27.2) | 18.4<br>(15.5,21.2) | 18.4<br>(15.5,21.3) | 16.6<br>(13.8,19.3) | 14.3<br>(9.0,19.2)  | Rural        |
| Women | Gangwon-do  | Pyeongchang-gun | 17.2<br>(15.9,18.4) | 24.1<br>(20.6,27.6) | 18.1<br>(15.4,20.9) | 14.8<br>(12.2,17.3) | 16.5<br>(13.7,19.3) | 12.5<br>(10.2,14.9) | 11.6<br>(5.8,15.0)  | Rural        |
| Women | Gangwon-do  | Jeongseon-gun   | 21.5<br>(20.0,22.9) | 28.7<br>(24.8,32.6) | 21.7<br>(18.6,24.8) | 21.8<br>(18.5,25.1) | 20.6<br>(17.5,23.7) | 14.8<br>(12.2,17.4) | 13.9<br>(9.3,18.9)  | Rural        |
| Women | Gangwon-do  | Cheorwon-gun    | 16.8<br>(15.5,18.1) | 23.8<br>(20.3,27.4) | 17.9<br>(15.0,20.7) | 16.5<br>(13.7,19.4) | 13.5<br>(11.0,16.1) | 12.2<br>(9.7,14.7)  | 11.6<br>(9.5,18.5)  | Rural        |
| Women | Gangwon-do  | Hwacheon-gun    | 16.7<br>(15.4,18.0) | 22.7<br>(19.0,26.3) | 18.3<br>(15.3,21.3) | 15.1<br>(12.4,17.7) | 13.9<br>(11.2,16.5) | 13.7<br>(11.1,16.3) | 9.0<br>(7.1,16.3)   | Rural        |
| Women | Gangwon-do  | Yanggu-gun      | 17.7<br>(16.4,19.0) | 23.2<br>(19.6,26.7) | 19.2<br>(16.1,22.4) | 15.8<br>(13.2,18.4) | 14.4<br>(11.8,17.0) | 16.3<br>(13.5,19.1) | 6.9<br>(2.4,11.6)   | Rural        |

|       |                   |                 |                     |                     |                     |                     |                     |                     |                     |              |
|-------|-------------------|-----------------|---------------------|---------------------|---------------------|---------------------|---------------------|---------------------|---------------------|--------------|
| Women | Gangwon-do        | Inje-gun        | 17.8<br>(16.4,19.1) | 26.3<br>(22.5,30.1) | 17.2<br>(14.2,20.2) | 15.7<br>(12.9,18.4) | 16.1<br>(13.2,19.0) | 13.5<br>(10.8,16.1) | 12.8<br>(8.3,17.5)  | Rural        |
| Women | Gangwon-do        | Goseong-gun     | 16.7<br>(15.4,18.0) | 22.1<br>(18.5,25.7) | 17.1<br>(14.2,20.0) | 16.1<br>(13.3,18.9) | 15.8<br>(12.9,18.6) | 12.6<br>(10.0,15.1) | 9.5<br>(5.2,13.8)   | Rural        |
| Women | Gangwon-do        | Yangyang-gun    | 16.2<br>(15.0,17.5) | 22.5<br>(19.1,25.9) | 17.8<br>(14.9,20.6) | 15.8<br>(13.1,18.5) | 14.7<br>(12.1,17.3) | 10.6<br>(8.4,12.7)  | 11.9<br>(7.8,16.4)  | Rural        |
| Women | Chungcheongbuk-do | Cheongju-si     | 15.9<br>(15.1,16.6) | 23.4<br>(21.2,25.5) | 17.8<br>(15.9,19.7) | 14.1<br>(12.5,15.7) | 12.9<br>(11.4,14.4) | 12.0<br>(10.5,13.4) | 11.4<br>(8.2,13.2)  | Metropolitan |
| Women | Chungcheongbuk-do | Chungju-si      | 19.3<br>(17.9,20.7) | 26.1<br>(22.5,29.8) | 22.2<br>(18.9,25.4) | 18.8<br>(15.7,21.9) | 15.0<br>(12.3,17.7) | 14.8<br>(12.1,17.6) | 11.3<br>(7.0,16.0)  | Urban        |
| Women | Chungcheongbuk-do | Jecheon-si      | 17.1<br>(15.8,18.4) | 23.5<br>(20.0,27.0) | 17.3<br>(14.5,20.2) | 17.5<br>(14.6,20.3) | 14.6<br>(12.0,17.2) | 13.0<br>(10.4,15.6) | 10.5<br>(6.8,15.8)  | Urban        |
| Women | Chungcheongbuk-do | Boeun-gun       | 20.2<br>(18.8,21.6) | 28.7<br>(24.4,33.0) | 22.6<br>(19.3,26.0) | 17.9<br>(15.1,20.7) | 18.2<br>(15.2,21.3) | 14.6<br>(11.9,17.3) | 14.1<br>(10.3,19.9) | Rural        |
| Women | Chungcheongbuk-do | Okcheon-gun     | 18.3<br>(17.0,19.7) | 22.2<br>(18.8,25.6) | 19.9<br>(16.9,22.8) | 18.6<br>(15.6,21.5) | 16.1<br>(13.5,18.7) | 14.9<br>(12.2,17.6) | 7.3<br>(3.3,12.3)   | Rural        |
| Women | Chungcheongbuk-do | Yeongdong-gun   | 18.8<br>(17.5,20.2) | 27.1<br>(23.3,31.0) | 20.2<br>(17.1,23.2) | 17.2<br>(14.4,19.9) | 15.0<br>(12.5,17.5) | 14.8<br>(12.0,17.5) | 12.3<br>(6.9,16.1)  | Rural        |
| Women | Chungcheongbuk-do | Jincheon-gun    | 19.0<br>(17.6,20.4) | 26.2<br>(22.5,30.0) | 18.5<br>(15.3,21.6) | 18.7<br>(15.7,21.8) | 14.9<br>(12.2,17.6) | 14.9<br>(14.0,19.8) | 9.3<br>(4.6,14.4)   | Rural        |
| Women | Chungcheongbuk-do | Goesan-gun      | 18.9<br>(17.5,20.3) | 25.2<br>(21.5,28.9) | 19.0<br>(15.9,22.1) | 17.9<br>(14.9,20.8) | 17.3<br>(14.5,20.2) | 15.3<br>(12.5,18.1) | 9.9<br>(8.4,17.6)   | Rural        |
| Women | Chungcheongbuk-do | Eumseong-gun    | 20.1<br>(18.6,21.5) | 27.7<br>(23.3,31.6) | 23.6<br>(19.9,27.2) | 19.2<br>(16.2,22.2) | 15.6<br>(13.1,18.1) | 14.5<br>(11.8,17.2) | 13.2<br>(9.4,19.0)  | Rural        |
| Women | Chungcheongbuk-do | Danyang-gun     | 20.1<br>(18.7,21.6) | 30.2<br>(26.2,34.3) | 19.3<br>(16.1,22.4) | 18.0<br>(15.0,21.0) | 17.2<br>(14.5,20.0) | 16.8<br>(13.9,19.7) | 13.4<br>(7.6,17.2)  | Rural        |
| Women | Chungcheongbuk-do | Jeungpyeong-gun | 16.4<br>(15.2,17.6) | 20.4<br>(17.3,23.6) | 16.8<br>(14.2,19.4) | 16.0<br>(13.4,18.5) | 15.3<br>(12.7,18.0) | 13.2<br>(10.7,15.6) | 7.2<br>(4.7,13.3)   | Rural        |
| Women | Chungcheongnam-do | Cheonan-si      | 17.6<br>(16.1,19.1) | 25.3<br>(21.1,29.5) | 19.1<br>(15.6,22.5) | 16.3<br>(13.2,19.4) | 14.1<br>(11.1,17.0) | 14.2<br>(11.2,17.2) | 11.1<br>(5.9,15.3)  | Metropolitan |
| Women | Chungcheongnam-do | Gongju-si       | 19.7<br>(18.3,21.0) | 25.5<br>(21.8,29.2) | 19.0<br>(16.0,21.9) | 20.0<br>(17.0,23.1) | 18.5<br>(15.6,21.5) | 15.3<br>(12.5,18.1) | 10.2<br>(5.2,14.6)  | Urban        |
| Women | Chungcheongnam-do | Boryeong-si     | 22.0<br>(20.5,23.5) | 31.3<br>(27.1,35.5) | 25.6<br>(21.9,29.3) | 17.6<br>(14.9,20.4) | 20.0<br>(16.9,23.1) | 15.9<br>(13.2,18.6) | 15.4<br>(10.1,19.9) | Urban        |
| Women | Chungcheongnam-do | Asan-si         | 18.4<br>(17.0,19.9) | 26.5<br>(22.4,30.6) | 20.3<br>(17.0,23.6) | 16.5<br>(13.5,19.6) | 14.4<br>(11.5,17.2) | 14.5<br>(11.6,17.3) | 12.0<br>(8.6,17.8)  | Urban        |
| Women | Chungcheongnam-do | Seosan-si       | 18.1<br>(16.8,19.5) | 22.9<br>(19.4,26.3) | 20.1<br>(16.9,23.3) | 16.2<br>(13.4,19.1) | 16.6<br>(13.7,19.6) | 15.1<br>(12.4,17.8) | 7.8<br>(3.1,12.3)   | Urban        |
| Women | Chungcheongnam-do | Nonsan-si       | 18.7<br>(17.4,20.0) | 27.2<br>(23.3,31.0) | 18.2<br>(15.6,20.9) | 17.1<br>(14.4,19.8) | 16.9<br>(14.1,19.7) | 13.9<br>(11.4,16.3) | 13.3<br>(8.2,17.2)  | Urban        |
| Women | Chungcheongnam-do | Gyeryong-si     | 15.9<br>(14.4,17.3) | 21.0<br>(17.4,24.7) | 18.2<br>(14.8,21.6) | 12.7<br>(9.9,15.6)  | 14.8<br>(11.8,17.8) | 12.6<br>(9.7,15.4)  | 8.4<br>(2.3,11.1)   | Urban        |
| Women | Chungcheongnam-do | Dangjin-si      | 18.9<br>(17.5,20.3) | 25.7<br>(21.9,29.5) | 20.8<br>(17.5,24.0) | 19.4<br>(16.2,22.6) | 14.7<br>(12.0,17.3) | 14.3<br>(11.6,17.1) | 11.4<br>(4.9,14.1)  | Rural        |
| Women | Chungcheongnam-do | Geumsan-gun     | 18.6<br>(17.3,19.9) | 24.3<br>(20.7,28.0) | 21.2<br>(18.2,24.2) | 17.1<br>(14.5,19.7) | 16.4<br>(13.7,19.1) | 13.8<br>(11.5,16.2) | 10.5<br>(5.4,14.4)  | Rural        |
| Women | Chungcheongnam-do | Buyeo-gun       | 17.4<br>(16.2,18.7) | 22.0<br>(18.5,25.4) | 19.5<br>(16.5,22.5) | 16.3<br>(13.7,18.9) | 16.5<br>(13.8,19.2) | 13.2<br>(10.7,15.7) | 8.8<br>(3.0,11.4)   | Rural        |
| Women | Chungcheongnam-do | Seocheon-gun    | 18.4<br>(17.0,19.7) | 25.7<br>(21.9,29.5) | 17.4<br>(14.5,20.2) | 16.6<br>(13.9,19.3) | 19.0<br>(15.9,22.0) | 13.4<br>(11.0,15.8) | 12.3<br>(6.6,15.4)  | Rural        |
| Women | Chungcheongnam-do | Cheongyang-gun  | 16.9<br>(15.6,18.2) | 22.3<br>(18.8,25.8) | 18.8<br>(15.8,21.8) | 18.8<br>(15.7,21.8) | 13.2<br>(10.7,15.7) | 11.1<br>(9.0,13.3)  | 11.2<br>(7.0,15.6)  | Rural        |
| Women | Chungcheongnam-do | Hongseong-gun   | 18.3<br>(17.0,19.6) | 22.0<br>(18.7,25.3) | 20.9<br>(17.8,24.1) | 16.7<br>(14.0,19.4) | 17.0<br>(14.2,19.8) | 14.9<br>(12.3,17.6) | 7.1<br>(5.0,14.0)   | Rural        |
| Women | Chungcheongnam-do | Yesan-gun       | 17.9<br>(16.6,19.3) | 26.3<br>(22.5,30.2) | 19.9<br>(16.9,23.0) | 14.6<br>(12.2,17.1) | 15.2<br>(12.6,17.8) | 14.3<br>(11.5,17.0) | 12.0<br>(8.7,18.1)  | Rural        |
| Women | Chungcheongnam-do | Tae'an-gun      | 17.9<br>(16.6,19.2) | 23.0<br>(19.6,26.5) | 20.4<br>(17.4,23.5) | 17.9<br>(15.0,20.9) | 15.3<br>(12.6,18.1) | 12.9<br>(10.4,15.4) | 10.1<br>(5.5,14.3)  | Urban        |
| Women | Jeollabuk-do      | Jeonju-si       | 15.8<br>(14.5,17.1) | 23.8<br>(20.1,27.5) | 16.6<br>(13.7,19.6) | 14.7<br>(11.9,17.6) | 13.0<br>(10.4,15.6) | 11.7<br>(9.2,14.2)  | 12.1<br>(9.1,17.5)  | Metropolitan |
| Women | Jeollabuk-do      | Gunsan-si       | 20.1<br>(18.6,21.5) | 29.4<br>(25.4,33.5) | 21.4<br>(18.1,24.6) | 17.3<br>(14.3,20.2) | 18.1<br>(15.0,21.1) | 14.6<br>(11.9,17.2) | 14.8<br>(9.0,18.4)  | Urban        |
| Women | Jeollabuk-do      | Iksan-si        | 20.8<br>(19.4,22.3) | 31.6<br>(27.6,35.6) | 20.8<br>(17.6,24.0) | 19.1<br>(16.0,22.1) | 17.3<br>(14.4,20.2) | 15.7<br>(13.0,18.4) | 15.9<br>(11.0,20.6) | Urban        |
| Women | Jeollabuk-do      | Jeongeup-si     | 20.6<br>(19.2,22.0) | 31.9<br>(27.7,36.0) | 19.1<br>(16.2,22.0) | 20.0<br>(17.0,22.9) | 15.5<br>(12.8,18.1) | 17.0<br>(14.2,19.8) | 14.9<br>(10.0,19.2) | Urban        |
| Women | Jeollabuk-do      | Namwon-si       | 20.7<br>(19.3,22.1) | 27.1<br>(23.4,30.7) | 23.0<br>(19.7,26.3) | 19.4<br>(16.4,22.4) | 16.4<br>(13.8,19.1) | 17.6<br>(14.8,20.3) | 9.5<br>(6.9,16.1)   | Urban        |
| Women | Jeollabuk-do      | Gimje-si        | 19.0<br>(17.7,20.4) | 26.9<br>(23.0,30.8) | 18.9<br>(16.0,21.8) | 16.7<br>(14.0,19.3) | 17.8<br>(14.8,20.8) | 14.9<br>(12.3,17.5) | 12.0<br>(6.4,15.8)  | Urban        |
| Women | Jeollabuk-do      | Wanju-gun       | 19.3<br>(18.0,20.7) | 29.1<br>(25.1,33.1) | 20.2<br>(17.2,23.2) | 18.2<br>(15.4,21.1) | 15.1<br>(12.5,17.8) | 14.6<br>(12.1,17.1) | 14.5<br>(7.7,17.1)  | Rural        |
| Women | Jeollabuk-do      | Jinan-gun       | 18.4<br>(17.0,19.8) | 25.4<br>(21.4,29.5) | 22.5<br>(19.1,26.0) | 15.0<br>(12.7,17.4) | 17.4<br>(14.3,20.4) | 11.8<br>(9.5,14.2)  | 13.6<br>(8.1,17.1)  | Rural        |

|       |                  |                |                     |                     |                     |                     |                     |                     |                     |              |
|-------|------------------|----------------|---------------------|---------------------|---------------------|---------------------|---------------------|---------------------|---------------------|--------------|
| Women | Jeollabuk-do     | Muju-gun       | 21.4<br>(19.9,22.8) | 26.8<br>(23.0,30.7) | 25.1<br>(21.4,28.8) | 19.1<br>(16.3,22.0) | 18.4<br>(15.4,21.3) | 17.1<br>(14.1,20.1) | 9.7<br>(3.2,12.8)   | Rural        |
| Women | Jeollabuk-do     | Jangsu-gun     | 19.8<br>(18.4,21.2) | 24.3<br>(20.6,28.1) | 21.5<br>(18.3,24.7) | 18.4<br>(15.5,21.3) | 15.8<br>(13.1,18.4) | 19.4<br>(16.2,22.6) | 4.9<br>(2.5,11.9)   | Rural        |
| Women | Jeollabuk-do     | Imsil-gun      | 19.5<br>(18.1,20.9) | 23.9<br>(20.0,27.8) | 19.0<br>(16.1,21.9) | 27.3<br>(23.5,31.1) | 13.4<br>(10.9,16.0) | 12.6<br>(10.3,14.9) | 11.3<br>(7.9,16.7)  | Rural        |
| Women | Jeollabuk-do     | Sunchang-gun   | 19.6<br>(18.2,21.0) | 27.5<br>(23.6,31.5) | 21.7<br>(18.3,25.0) | 17.9<br>(15.2,20.6) | 15.5<br>(12.9,18.2) | 14.8<br>(12.1,17.5) | 12.7<br>(6.3,15.5)  | Rural        |
| Women | Jeollabuk-do     | Gochang-gun    | 24.4<br>(22.9,26.0) | 31.4<br>(27.2,35.6) | 23.8<br>(20.6,27.1) | 23.1<br>(19.8,26.5) | 23.8<br>(20.4,27.2) | 20.6<br>(17.3,23.8) | 10.8<br>(5.8,15.4)  | Rural        |
| Women | Jeollabuk-do     | Buan-gun       | 21.1<br>(19.6,22.5) | 32.0<br>(27.6,36.4) | 20.4<br>(17.5,23.3) | 19.9<br>(16.8,23.1) | 15.2<br>(12.6,17.8) | 18.3<br>(15.2,21.3) | 13.7<br>(8.6,18.2)  | Rural        |
| Women | Jeollanam-do     | Mokpo-si       | 19.5<br>(18.1,21.0) | 26.5<br>(22.7,30.3) | 22.0<br>(18.6,25.4) | 19.8<br>(16.6,23.0) | 15.9<br>(13.1,18.7) | 13.4<br>(10.8,16.1) | 13.1<br>(6.0,15.0)  | Urban        |
| Women | Jeollanam-do     | Yeosu-si       | 17.9<br>(16.6,19.3) | 23.3<br>(19.9,26.8) | 17.4<br>(14.5,20.2) | 17.9<br>(15.0,20.7) | 14.1<br>(11.5,16.6) | 17.3<br>(14.4,20.3) | 6.0<br>(1.9,10.9)   | Urban        |
| Women | Jeollanam-do     | Suncheon-si    | 16.7<br>(15.4,18.0) | 22.6<br>(19.0,26.2) | 19.2<br>(16.1,22.2) | 15.2<br>(12.4,18.1) | 15.8<br>(13.0,18.7) | 11.2<br>(8.9,13.6)  | 11.4<br>(9.2,17.8)  | Urban        |
| Women | Jeollanam-do     | Naju-si        | 19.1<br>(17.8,20.4) | 28.8<br>(25.0,32.7) | 21.3<br>(18.1,24.4) | 16.6<br>(14.0,19.2) | 14.9<br>(12.5,17.3) | 13.8<br>(11.4,16.2) | 15.0<br>(11.9,21.1) | Urban        |
| Women | Jeollanam-do     | Gwangyang-si   | 16.8<br>(15.4,18.1) | 24.1<br>(20.2,27.9) | 18.0<br>(14.8,21.2) | 15.5<br>(12.6,18.3) | 14.1<br>(11.2,17.0) | 12.6<br>(9.9,15.2)  | 11.5<br>(6.9,16.1)  | Urban        |
| Women | Jeollanam-do     | Damyang-gun    | 19.2<br>(17.8,20.5) | 24.8<br>(21.1,28.5) | 21.1<br>(18.0,24.3) | 16.4<br>(13.8,19.0) | 17.2<br>(14.5,20.0) | 16.6<br>(13.7,19.5) | 8.2<br>(6.6,15.2)   | Rural        |
| Women | Jeollanam-do     | Gokseong-gun   | 18.3<br>(17.0,19.6) | 23.1<br>(19.6,26.6) | 18.5<br>(15.8,21.2) | 19.4<br>(16.4,22.4) | 16.1<br>(13.5,18.7) | 14.5<br>(12.2,16.9) | 8.6<br>(5.7,14.3)   | Rural        |
| Women | Jeollanam-do     | Gurye-gun      | 14.3<br>(13.2,15.5) | 21.1<br>(17.8,24.5) | 16.7<br>(14.0,19.3) | 12.3<br>(10.2,14.4) | 10.6<br>(8.5,12.6)  | 11.5<br>(9.2,13.8)  | 9.6<br>(7.2,15.6)   | Rural        |
| Women | Jeollanam-do     | Goheung-gun    | 16.2<br>(14.9,17.4) | 26.0<br>(21.8,30.2) | 16.6<br>(14.0,19.1) | 17.4<br>(14.4,20.4) | 11.9<br>(9.9,13.9)  | 8.9<br>(7.2,10.6)   | 17.1<br>(14.2,22.2) | Rural        |
| Women | Jeollanam-do     | Boseong-gun    | 20.1<br>(18.7,21.5) | 29.1<br>(24.9,33.3) | 21.7<br>(18.5,25.0) | 20.8<br>(17.6,24.0) | 16.1<br>(13.5,18.7) | 13.3<br>(11.2,15.4) | 15.8<br>(11.8,21.0) | Rural        |
| Women | Jeollanam-do     | Hwasun-gun     | 20.7<br>(19.4,22.1) | 31.6<br>(27.6,35.7) | 19.9<br>(17.0,22.8) | 20.4<br>(17.3,23.5) | 16.6<br>(14.0,19.2) | 15.8<br>(13.3,18.4) | 15.8<br>(11.6,21.0) | Rural        |
| Women | Jeollanam-do     | Jangheung-gun  | 16.0<br>(14.8,17.1) | 22.4<br>(18.9,25.9) | 16.1<br>(13.5,18.7) | 14.3<br>(11.8,16.7) | 12.5<br>(10.4,14.6) | 14.9<br>(12.2,17.5) | 7.5<br>(2.6,11.0)   | Rural        |
| Women | Jeollanam-do     | Gangjin-gun    | 15.7<br>(14.5,16.9) | 21.7<br>(18.4,25.1) | 14.6<br>(12.1,17.0) | 14.1<br>(11.5,16.6) | 14.7<br>(12.0,17.3) | 13.6<br>(11.0,16.2) | 8.1<br>(1.5,9.7)    | Rural        |
| Women | Jeollanam-do     | Haenam-gun     | 19.1<br>(17.8,20.4) | 24.6<br>(21.0,28.2) | 19.7<br>(16.8,22.5) | 18.2<br>(15.5,20.8) | 17.1<br>(14.3,20.0) | 16.1<br>(13.6,18.7) | 8.5<br>(4.9,14.1)   | Rural        |
| Women | Jeollanam-do     | Yeongam-gun    | 19.3<br>(18.0,20.7) | 26.5<br>(22.8,30.3) | 21.0<br>(17.9,24.2) | 19.2<br>(16.2,22.3) | 17.4<br>(14.6,20.2) | 12.4<br>(10.1,14.7) | 14.1<br>(8.7,17.7)  | Rural        |
| Women | Jeollanam-do     | Muan-gun       | 16.1<br>(14.9,17.3) | 19.6<br>(16.5,22.6) | 16.4<br>(13.7,19.1) | 17.6<br>(14.8,20.3) | 13.3<br>(11.0,15.7) | 13.8<br>(11.2,16.4) | 5.8<br>(3.1,11.5)   | Rural        |
| Women | Jeollanam-do     | Hampyeong-gun  | 21.7<br>(20.2,23.2) | 30.7<br>(26.4,34.9) | 22.2<br>(18.9,25.5) | 19.7<br>(16.5,22.9) | 18.5<br>(15.5,21.6) | 17.3<br>(14.3,20.3) | 13.4<br>(11.2,20.8) | Rural        |
| Women | Jeollanam-do     | Yeonggwang-gun | 21.7<br>(20.3,23.1) | 30.7<br>(26.8,34.7) | 23.5<br>(20.3,26.8) | 19.6<br>(16.6,22.6) | 17.8<br>(15.2,20.4) | 17.4<br>(14.4,20.4) | 13.3<br>(10.5,20.3) | Rural        |
| Women | Jeollanam-do     | Jangseong-gun  | 18.3<br>(17.0,19.6) | 25.9<br>(22.0,29.7) | 19.3<br>(16.3,22.2) | 16.5<br>(13.8,19.1) | 17.0<br>(14.2,19.7) | 13.3<br>(10.9,15.7) | 12.6<br>(3.1,12.1)  | Rural        |
| Women | Jeollanam-do     | Wando-gun      | 18.4<br>(17.1,19.7) | 25.7<br>(22.0,29.4) | 21.2<br>(18.3,24.2) | 16.2<br>(13.6,18.9) | 15.8<br>(13.4,18.2) | 13.0<br>(10.7,15.3) | 12.7<br>(9.5,18.3)  | Rural        |
| Women | Jeollanam-do     | Jindo-gun      | 20.7<br>(19.3,22.1) | 29.2<br>(25.1,33.3) | 21.6<br>(18.4,24.7) | 19.6<br>(16.7,22.6) | 18.0<br>(15.2,20.8) | 15.3<br>(12.6,18.0) | 13.9<br>(10.4,19.6) | Rural        |
| Women | Jeollanam-do     | Sinan-gun      | 22.0<br>(20.5,23.6) | 26.5<br>(22.8,30.3) | 27.7<br>(23.6,31.8) | 17.0<br>(14.3,19.7) | 22.2<br>(18.8,25.7) | 16.9<br>(13.9,19.9) | 9.6<br>(8.8,18.6)   | Rural        |
| Women | Gyeongsangbuk-do | Nam-gu         | 19.7<br>(18.3,21.2) | 28.6<br>(24.7,32.6) | 20.1<br>(16.9,23.3) | 18.7<br>(15.5,21.8) | 15.2<br>(12.3,18.0) | 16.0<br>(13.1,18.9) | 12.6<br>(7.2,16.8)  | Metropolitan |
| Women | Gyeongsangbuk-do | Buk-gu         | 17.9<br>(16.6,19.3) | 26.6<br>(22.7,30.4) | 18.4<br>(15.3,21.5) | 16.4<br>(13.5,19.2) | 15.1<br>(12.3,17.9) | 13.5<br>(10.9,16.2) | 13.1<br>(7.6,16.6)  | Metropolitan |
| Women | Gyeongsangbuk-do | Gyeongju-si    | 17.8<br>(16.6,19.1) | 24.8<br>(21.3,28.4) | 19.6<br>(16.6,22.5) | 16.8<br>(14.0,19.5) | 15.6<br>(13.1,18.0) | 12.8<br>(10.5,15.2) | 12.0<br>(8.6,17.4)  | Urban        |
| Women | Gyeongsangbuk-do | Gimcheon-si    | 17.1<br>(15.8,18.3) | 21.6<br>(18.4,24.8) | 18.0<br>(15.2,20.8) | 17.3<br>(14.5,20.2) | 14.7<br>(12.0,17.3) | 13.5<br>(11.0,16.0) | 8.1<br>(3.5,12.3)   | Urban        |
| Women | Gyeongsangbuk-do | Andong-si      | 18.9<br>(17.5,20.2) | 26.7<br>(23.0,30.3) | 21.8<br>(18.5,25.1) | 17.5<br>(14.8,20.3) | 14.8<br>(12.2,17.5) | 14.0<br>(11.5,16.5) | 12.7<br>(7.1,16.3)  | Urban        |
| Women | Gyeongsangbuk-do | Gumi-si        | 18.7<br>(17.6,19.9) | 27.7<br>(24.4,30.9) | 20.8<br>(18.0,23.6) | 15.7<br>(13.3,18.0) | 16.1<br>(13.7,18.5) | 14.7<br>(12.6,16.8) | 13.0<br>(8.1,14.7)  | Urban        |
| Women | Gyeongsangbuk-do | Yeongju-si     | 19.5<br>(18.1,20.8) | 26.3<br>(22.6,30.0) | 21.0<br>(17.9,24.0) | 18.8<br>(15.9,21.7) | 16.0<br>(13.4,18.6) | 15.7<br>(13.1,18.4) | 10.6<br>(5.8,15.2)  | Urban        |
| Women | Gyeongsangbuk-do | Yeongcheon-si  | 21.0<br>(19.6,22.4) | 25.6<br>(22.0,29.1) | 23.6<br>(20.4,26.8) | 19.7<br>(16.6,22.7) | 20.6<br>(17.5,23.7) | 15.7<br>(12.9,18.4) | 9.9<br>(3.6,12.8)   | Urban        |
| Women | Gyeongsangbuk-do | Sangju-si      | 18.7<br>(17.3,20.0) | 26.3<br>(22.6,30.1) | 17.8<br>(15.0,20.7) | 17.4<br>(14.6,20.2) | 15.8<br>(13.2,18.4) | 15.9<br>(13.0,18.7) | 10.4<br>(3.8,12.8)  | Urban        |

|       |                  |                 |                     |                     |                     |                     |                     |                     |                     |              |
|-------|------------------|-----------------|---------------------|---------------------|---------------------|---------------------|---------------------|---------------------|---------------------|--------------|
| Women | Gyeongsangbuk-do | Mungyeong-si    | 18.7<br>(17.4,20.0) | 22.7<br>(19.3,26.1) | 20.4<br>(17.5,23.4) | 18.8<br>(16.0,21.6) | 17.8<br>(14.9,20.7) | 13.6<br>(11.3,15.9) | 9.1<br>(3.5,12.3)   | Urban        |
| Women | Gyeongsangbuk-do | Gyeongsan-si    | 18.5<br>(17.1,19.9) | 24.7<br>(21.0,28.4) | 20.7<br>(17.5,24.0) | 15.7<br>(12.9,18.5) | 17.3<br>(14.3,20.2) | 14.3<br>(11.6,16.9) | 10.4<br>(5.8,14.8)  | Urban        |
| Women | Gyeongsangbuk-do | Gunwi-gun       | 18.8<br>(17.5,20.2) | 25.9<br>(22.0,29.9) | 18.9<br>(16.1,21.7) | 17.6<br>(14.7,20.4) | 17.1<br>(14.2,19.9) | 14.9<br>(12.2,17.6) | 11.0<br>(4.3,13.7)  | Rural        |
| Women | Gyeongsangbuk-do | Uiseong-gun     | 18.4<br>(17.0,19.8) | 25.3<br>(21.4,29.3) | 18.2<br>(15.3,21.2) | 16.1<br>(13.3,18.9) | 17.9<br>(14.9,20.8) | 14.8<br>(12.0,17.6) | 10.5<br>(3.5,12.5)  | Rural        |
| Women | Gyeongsangbuk-do | Cheongsong-gun  | 20.0<br>(18.6,21.4) | 27.3<br>(23.2,31.3) | 21.4<br>(18.3,24.6) | 17.5<br>(14.8,20.2) | 18.1<br>(15.2,21.0) | 15.9<br>(13.3,18.4) | 11.4<br>(7.1,16.5)  | Rural        |
| Women | Gyeongsangbuk-do | Yeongyang-gun   | 23.2<br>(21.6,24.8) | 34.2<br>(29.4,39.1) | 23.9<br>(20.4,27.3) | 22.1<br>(18.8,25.4) | 19.9<br>(16.7,23.0) | 16.5<br>(13.8,19.1) | 17.7<br>(9.3,19.3)  | Rural        |
| Women | Gyeongsangbuk-do | Yeongdeok-gun   | 17.6<br>(16.3,18.9) | 25.1<br>(21.4,28.8) | 20.9<br>(17.6,24.2) | 15.2<br>(13.0,17.4) | 14.3<br>(11.9,16.8) | 12.2<br>(10.0,14.5) | 12.9<br>(9.1,17.5)  | Rural        |
| Women | Gyeongsangbuk-do | Cheongdo-gun    | 19.3<br>(18.0,20.7) | 22.0<br>(18.8,25.2) | 19.6<br>(16.6,22.7) | 16.4<br>(13.9,18.8) | 19.5<br>(16.3,22.6) | 19.6<br>(16.3,22.8) | 2.4<br>(-2.3,6.7)   | Rural        |
| Women | Gyeongsangbuk-do | Goryeong-gun    | 20.1<br>(18.7,21.5) | 25.6<br>(21.9,29.3) | 19.6<br>(16.6,22.5) | 19.7<br>(16.5,22.8) | 17.5<br>(14.8,20.3) | 18.2<br>(15.1,21.3) | 7.4<br>(1.8,11.0)   | Rural        |
| Women | Gyeongsangbuk-do | Seongju-gun     | 13.3<br>(12.2,14.4) | 20.4<br>(17.0,23.7) | 14.9<br>(12.2,17.5) | 11.5<br>(9.3,13.6)  | 10.0<br>(8.0,12.1)  | 9.8<br>(7.7,12.0)   | 10.6<br>(5.0,13.0)  | Rural        |
| Women | Gyeongsangbuk-do | Chilgok-gun     | 18.5<br>(17.1,19.9) | 23.7<br>(20.0,27.5) | 18.6<br>(15.4,21.9) | 19.6<br>(16.3,22.9) | 15.6<br>(12.7,18.5) | 15.6<br>(12.7,18.5) | 8.1<br>(3.0,12.2)   | Rural        |
| Women | Gyeongsangbuk-do | Yecheon-gun     | 19.8<br>(18.4,21.2) | 28.5<br>(24.4,32.7) | 21.3<br>(18.1,24.4) | 20.4<br>(17.0,23.8) | 15.3<br>(12.8,17.8) | 13.4<br>(11.1,15.7) | 15.1<br>(7.7,16.9)  | Rural        |
| Women | Gyeongsangbuk-do | Bonghwa-gun     | 23.0<br>(21.4,24.6) | 32.2<br>(27.5,37.0) | 23.5<br>(20.0,27.0) | 20.9<br>(17.7,24.0) | 23.0<br>(19.4,26.6) | 15.9<br>(13.2,18.5) | 16.3<br>(10.9,20.7) | Rural        |
| Women | Gyeongsangbuk-do | Uljin-gun       | 20.6<br>(19.2,21.9) | 30.5<br>(26.4,34.5) | 22.3<br>(19.2,25.4) | 20.2<br>(17.3,23.2) | 16.9<br>(14.2,19.7) | 13.4<br>(11.2,15.6) | 17.1<br>(12.0,21.2) | Rural        |
| Women | Gyeongsangbuk-do | Ulleung-gun     | 17.7<br>(16.3,19.1) | 22.4<br>(18.9,25.9) | 20.1<br>(17.0,23.3) | 17.1<br>(14.0,20.2) | 15.1<br>(12.3,18.0) | 13.4<br>(10.7,16.2) | 9.0<br>(6.1,15.5)   | Rural        |
| Women | Gyeongsangnam-do | Changwon-si     | 20.3<br>(18.6,21.9) | 26.5<br>(22.1,31.0) | 20.8<br>(17.1,24.5) | 19.6<br>(16.1,23.2) | 19.1<br>(15.5,22.6) | 16.0<br>(12.7,19.3) | 10.5<br>(4.8,14.2)  | Metropolitan |
| Women | Gyeongsangnam-do | Masan-si        | 15.9<br>(14.6,17.1) | 23.4<br>(20.0,26.9) | 15.8<br>(13.0,18.6) | 14.5<br>(11.8,17.2) | 14.9<br>(12.2,17.6) | 11.2<br>(8.8,13.5)  | 12.2<br>(6.5,15.1)  | Metropolitan |
| Women | Gyeongsangnam-do | Jinju-si        | 17.5<br>(16.2,18.8) | 24.7<br>(21.1,28.2) | 17.8<br>(14.8,20.7) | 16.7<br>(13.9,19.5) | 14.6<br>(12.0,17.2) | 14.3<br>(11.6,17.0) | 10.4<br>(5.9,14.9)  | Urban        |
| Women | Gyeongsangnam-do | Jinhae-si       | 17.6<br>(16.2,19.0) | 22.3<br>(18.7,25.9) | 19.4<br>(16.1,22.6) | 16.1<br>(13.1,19.1) | 15.7<br>(12.8,18.6) | 14.8<br>(12.0,17.7) | 7.5<br>(3.4,12.6)   | Metropolitan |
| Women | Gyeongsangnam-do | Tongyeong-si    | 21.9<br>(20.4,23.3) | 29.0<br>(25.1,32.9) | 22.1<br>(18.8,25.4) | 20.3<br>(17.2,23.5) | 17.9<br>(15.0,20.8) | 20.7<br>(17.4,23.9) | 8.3<br>(3.9,13.7)   | Urban        |
| Women | Gyeongsangnam-do | Sacheon-si      | 17.8<br>(16.5,19.1) | 25.4<br>(21.7,29.1) | 20.3<br>(17.2,23.4) | 15.7<br>(13.1,18.4) | 14.6<br>(12.1,17.2) | 13.5<br>(11.0,15.9) | 11.9<br>(6.4,15.2)  | Urban        |
| Women | Gyeongsangnam-do | Gimhae-si       | 18.5<br>(17.0,20.0) | 23.4<br>(19.5,27.4) | 18.4<br>(15.1,21.7) | 17.4<br>(14.2,20.6) | 16.0<br>(13.0,19.1) | 17.6<br>(14.4,20.8) | 5.8<br>(1.4,10.6)   | Urban        |
| Women | Gyeongsangnam-do | Miryang-si      | 19.1<br>(17.8,20.4) | 25.7<br>(22.3,29.2) | 21.2<br>(18.1,24.3) | 20.3<br>(17.2,23.3) | 15.4<br>(12.9,17.8) | 13.1<br>(10.8,15.4) | 12.6<br>(9.3,18.1)  | Urban        |
| Women | Gyeongsangnam-do | Geoje-si        | 18.5<br>(16.9,20.0) | 21.6<br>(17.9,25.4) | 20.5<br>(16.9,24.2) | 19.0<br>(15.5,22.5) | 16.0<br>(12.7,19.2) | 15.2<br>(12.1,18.2) | 6.4<br>(1.6,10.8)   | Urban        |
| Women | Gyeongsangnam-do | Yangsan-si      | 15.2<br>(13.9,16.5) | 23.1<br>(19.5,26.6) | 15.5<br>(12.4,18.5) | 13.8<br>(11.1,16.6) | 12.1<br>(9.5,14.6)  | 11.8<br>(9.3,14.4)  | 11.3<br>(4.2,13.0)  | Urban        |
| Women | Gyeongsangnam-do | Uiryeong-gun    | 18.0<br>(16.7,19.3) | 22.5<br>(19.1,25.9) | 20.4<br>(17.1,23.7) | 16.2<br>(13.5,18.8) | 15.9<br>(13.3,18.5) | 15.6<br>(12.7,18.5) | 6.9<br>(5.6,14.6)   | Rural        |
| Women | Gyeongsangnam-do | Haman-gun       | 17.6<br>(16.4,18.8) | 22.1<br>(18.9,25.3) | 17.9<br>(15.2,20.7) | 17.5<br>(14.8,20.2) | 14.7<br>(12.2,17.2) | 16.0<br>(13.3,18.7) | 6.1<br>(2.6,11.6)   | Rural        |
| Women | Gyeongsangnam-do | Changnyeong-gun | 20.7<br>(19.3,22.1) | 25.8<br>(22.1,29.4) | 21.9<br>(18.8,24.9) | 18.7<br>(15.8,21.5) | 18.1<br>(15.5,20.8) | 19.3<br>(16.2,22.5) | 6.5<br>(-0.3,9.3)   | Rural        |
| Women | Gyeongsangnam-do | Goseong-gun     | 17.3<br>(16.1,18.6) | 20.5<br>(17.3,23.7) | 18.2<br>(15.5,21.0) | 17.9<br>(15.1,20.8) | 17.2<br>(14.3,20.0) | 12.9<br>(10.5,15.2) | 7.6<br>(3.3,11.9)   | Rural        |
| Women | Gyeongsangnam-do | Namhae-gun      | 23.5<br>(22.0,25.1) | 32.8<br>(28.3,37.4) | 25.8<br>(22.2,29.4) | 22.8<br>(19.4,26.1) | 19.2<br>(16.3,22.1) | 17.7<br>(14.6,20.8) | 15.1<br>(9.8,19.4)  | Rural        |
| Women | Gyeongsangnam-do | Hadong-gun      | 23.5<br>(22.0,25.0) | 30.7<br>(26.4,34.9) | 27.1<br>(23.5,30.8) | 20.6<br>(17.5,23.6) | 18.8<br>(16.1,21.6) | 20.4<br>(17.1,23.7) | 10.3<br>(2.6,12.4)  | Rural        |
| Women | Gyeongsangnam-do | Sancheong-gun   | 20.8<br>(19.4,22.2) | 27.1<br>(23.1,31.1) | 23.6<br>(20.2,27.0) | 19.5<br>(16.7,22.2) | 18.2<br>(15.5,21.0) | 15.6<br>(12.9,18.3) | 11.5<br>(6.8,16.0)  | Rural        |
| Women | Gyeongsangnam-do | Hamyang-gun     | 20.6<br>(19.2,22.0) | 23.7<br>(20.3,27.2) | 22.3<br>(19.0,25.5) | 19.4<br>(16.5,22.3) | 19.2<br>(16.2,22.2) | 18.5<br>(15.4,21.7) | 5.2<br>(0.9,10.3)   | Rural        |
| Women | Gyeongsangnam-do | Geochang-gun    | 18.1<br>(16.8,19.3) | 25.2<br>(21.7,28.7) | 17.2<br>(14.5,19.8) | 19.1<br>(16.2,22.1) | 15.1<br>(12.6,17.6) | 13.9<br>(11.5,16.4) | 11.3<br>(6.2,15.2)  | Rural        |
| Women | Gyeongsangnam-do | Hapcheon-gun    | 21.0<br>(19.6,22.4) | 25.7<br>(21.9,29.6) | 24.5<br>(20.9,28.0) | 21.8<br>(18.6,25.0) | 18.5<br>(15.6,21.5) | 14.7<br>(12.3,17.1) | 11.0<br>(3.8,13.0)  | Rural        |
| Women | Jeju-do          | Jeju-si         | 16.6<br>(15.9,17.4) | 24.3<br>(22.1,26.5) | 19.6<br>(17.6,21.6) | 14.3<br>(12.6,16.0) | 12.7<br>(11.2,14.2) | 12.9<br>(11.4,14.4) | 11.4<br>(9.1,14.3)  | Urban        |
| Women | Jeju-do          | Seogwipo-si     | 16.4<br>(15.6,17.1) | 23.3<br>(21.2,25.4) | 17.3<br>(15.6,19.1) | 14.9<br>(13.3,16.6) | 13.0<br>(11.5,14.4) | 13.8<br>(12.2,15.4) | 9.5<br>(6.1,11.5)   | Urban        |

**Appendix 5.** Mean equivalized household income and its relative ratios and absolute differences among metropolitan, urban, and rural areas: Findings for total study population, those with the lowest and highest income quintiles using the Community Health Survey in South Korea, 2008-2014

| Subjects                           | Measures                      | Metropolitan | Urban  | Rural     |
|------------------------------------|-------------------------------|--------------|--------|-----------|
| Total study population             | Mean equivalized house income | 2119.2       | 1831.9 | 1407.1    |
|                                    | Standard deviation            | 1971.4       | 1826.9 | 1830.1    |
|                                    | Relative ratio                | 1.5          | 1.3    | Reference |
|                                    | Absolute difference           | 712.1        | 424.8  | Reference |
| Those with Lowest income quintile  | Mean equivalized house income | 818.7        | 674.7  | 444.8     |
|                                    | Standard deviation            | 410.5        | 391.8  | 292.2     |
|                                    | Relative ratio                | 1.8          | 1.5    | Reference |
|                                    | Absolute difference           | 373.9        | 229.9  | Reference |
| Those with Highest income quintile | Mean equivalized house income | 4088.0       | 3638.5 | 3036.4    |
|                                    | Standard deviation            | 3496.9       | 3245.4 | 3453.5    |
|                                    | Relative ratio                | 1.3          | 1.2    | Reference |
|                                    | Absolute difference           | 1051.6       | 602.1  | Reference |
